# Supplementary material for: DLPNO-CCSD(T) and DFT study of the acetate-assisted C–H activation of benzaldimine at [RuCl2(p-cymene)]2: the relevance of ligand exchange processes at ruthenium(ii) complexes in polar protic media
Source: Royal Society of Chemistry journal article supplement (doi:10.1039/d4dt00380b), 2024-01-01
Supplement: d4dt00380b1.pdf [file d4dt00380b1.pdf]

## Supplementary Information

### DLPNO-CCSD(T) and DFT study of the acetate-assisted C-H activation of benzaldimine at [RuCl<sub>2</sub>(*p*-cymene)]<sub>2</sub>: relevance of the ligand exchange processes at ruthenium(II) complexes in polar protic media

Vicente Ojea\* and María Ruiz.

Departamento de Química, Facultad de Ciencias, Universidade da Coruña. E-15078 A Coruña, Spain.

### Index

| Contents                                                                                                                                                                                                                               | pages     |
|----------------------------------------------------------------------------------------------------------------------------------------------------------------------------------------------------------------------------------------|-----------|
| 1. Rationale for the selection of methods                                                                                                                                                                                              | S2-S4     |
| 2. Computational methods                                                                                                                                                                                                               | S5-S6     |
| 3. References                                                                                                                                                                                                                          | S7-S10    |
| 4. Additional Chart, Figures, Schemes and Tables                                                                                                                                                                                       | S11-S40   |
| <b>Chart S1.</b> Constrained energy profile for <i>p</i> -cymene dissociation from <b>F<sup>c</sup></b>                                                                                                                                | S15       |
| <b>Figure S1.</b> Evaluation set                                                                                                                                                                                                       | S11       |
| <b>Figure S2.</b> Energy plots at DLPNO-CCSD(T)/CBS(CPCM) level                                                                                                                                                                        | S24       |
| <b>Figure S3.</b> Energy plots at DLPNO-CCSD(T)/CBS(SMD) level                                                                                                                                                                         | S27       |
| <b>Figure S4, S5 and S6.</b> Energy plots from <b>C<sup>1</sup></b> to <b>E</b> in the <i>S</i> <sub>1</sub> -, <i>S</i> <sub>2</sub> -, and <i>S</i> <sub>3</sub> -reaction channels                                                  | S33-S35   |
| <b>Figure S7.</b> Other TS structures from <b>D<sup>+</sup></b> to <b>E<sup>+</sup></b> in the <i>S</i> <sub>2</sub> -reaction channel                                                                                                 | S38       |
| <b>Figure S8a,b.</b> Energy plots for AcO-/Cl- exchange processes in the <i>S</i> <sub>1</sub> - and <i>S</i> <sub>2</sub> -reaction channels                                                                                          | S39-S40   |
| <b>Scheme S1.</b> C-H activation at Ru(II) arene complexes featuring a protic directing-group                                                                                                                                          | S12       |
| <b>Scheme S2.</b> Reaction of ruthenium dimeric precursor ( <b>B<sup>0</sup></b> ) with acetate                                                                                                                                        | S12       |
| <b>Scheme S3.</b> Solvent-assisted dissociation of <i>p</i> -cymene from <b>B<sup>2</sup></b>                                                                                                                                          | S12       |
| <b>Scheme S4a,b.</b> Formation of <b>D<sup>+</sup></b> and IRC pathways from <b>TS(C<sup>1</sup>-D<sup>+</sup>)</b> and <b>TS(C<sup>2</sup>-D<sup>+</sup>)</b>                                                                         | S13-S14   |
| <b>Scheme S4c.</b> Other reaction pathways towards <b>D<sup>+</sup></b>                                                                                                                                                                | S15       |
| <b>Scheme S5a.</b> Formation of <b>F<sup>A</sup></b> and IRC pathways from <b>TS(F-F<sup>A</sup>)</b>                                                                                                                                  | S16       |
| <b>Scheme S5b.</b> Other TS structures towards <b>F<sup>A</sup></b> and <i>cis</i> - <b>F<sup>A</sup></b>                                                                                                                              | S17       |
| <b>Scheme S5c.</b> Solvent-assisted interchange pathways from <b>F<sup>c</sup></b> to <b>F<sup>S</sup></b> or <b>F<sup>A</sup></b>                                                                                                     | S18       |
| <b>Scheme S6.</b> C-H bond activation of neutral diacetate ruthenium intermediate <i>cis</i> - <b>F<sup>A</sup></b>                                                                                                                    | S19       |
| <b>Scheme S7.</b> C-H bond activation of neutral diacetate ruthenium intermediate <b>F<sup>c</sup></b>                                                                                                                                 | S19       |
| <b>Scheme S8.</b> C-H activation of neutral diacetate ruthenium intermediate <b>F<sup>S</sup></b>                                                                                                                                      | S20       |
| <b>Scheme S9.</b> C-H activation of neutral diacetate ruthenium intermediate <b>F<sup>2S</sup></b>                                                                                                                                     | S20       |
| <b>Scheme S10a.</b> Formation of <b>INT(E-H)<sup>+</sup>•S</b> and IRC pathways from <b>TS(E-H)1•S</b>                                                                                                                                 | S21       |
| <b>Scheme S10b.</b> Formation of <b>H•S</b> and IRC pathways from <b>TS(E-H)2•S</b>                                                                                                                                                    | S22       |
| <b>Scheme S10c.</b> Alternative routes for acetate/chloride exchange on cycloruthenates                                                                                                                                                | S23       |
| <b>Scheme S11.</b> Equilibria between solvent, Cl <sup>-</sup> , AcO <sup>-</sup> and HOAc in MeOH solution                                                                                                                            | S25       |
| <b>Scheme S12.</b> Equilibria between <b>B<sup>1</sup>•S<sub>n</sub></b> precursors in MeOH solution                                                                                                                                   | S28       |
| <b>Schemes S13a-c.</b> Formation of <b>D<sup>+</sup></b> and IRC paths from <b>TS(C<sup>1</sup>-D<sup>+</sup>)•S</b> , <b>TS(C<sup>1</sup>-D<sup>+</sup>)•S<sub>2</sub></b> , and <b>TS(C<sup>1</sup>-D<sup>+</sup>)•S<sub>3</sub></b> | S29-S31   |
| <b>Scheme S14.</b> Non-solvated TS structures from <b>D<sup>+</sup></b> to <b>E<sup>+</sup></b> in the <i>S</i> <sub>2</sub> - and <i>S</i> <sub>3</sub> -reaction channels                                                            | S32       |
| <b>Scheme S15a,b.</b> Solvated TS structures from <b>D<sup>+</sup></b> to <b>E<sup>+</sup></b> in the <i>S</i> <sub>2</sub> - and <i>S</i> <sub>3</sub> -reaction channels                                                             | S36-S37   |
| <b>Table S1.</b> Computed bond distances and MUEs                                                                                                                                                                                      | S11       |
| <b>Table S2.</b> Performance of DFT methods against the DLPNO-CCSD(T)/CBS(CPCM) benchmark                                                                                                                                              | S26       |
| 5. Computed cartesian coordinates, lowest frequencies, and energies                                                                                                                                                                    | S41-S183  |
| 6. Cartesian coordinates and energies for IRC calculations on selected TS structures                                                                                                                                                   | S184-S197 |

## Rationale for the selection of methods

**DFT methods.** It would be desirable to have a benchmark of the performance of DFT methods for reproducing the geometry of ruthenium(II) complexes in methanol solution. However, the lack of the experimental data required as reference make such assessment unfeasible. Guided by previous benchmarks for ruthenium complexes,<sup>1</sup> we have assessed in vacuum the performance of 12 DFT methods for reproducing selected distances of the coordination center for a small set of ruthenium(II) complexes (whose structures have been determined by X-ray diffraction analysis) by using an affordable double- $\zeta$  basis set with a pseudopotential for ruthenium. The evaluation set included 3 cycloruthenated complexes derived from Schiff bases (with Cambridge Structural Database (CSD) deposit codes MEJYOR, MEJYUX and ZUGVUU) and the intermediate chloroacetate(*p*-cymene)ruthenium complex **B**<sup>1</sup> (with CSD deposit code OMATUR), as depicted in Figure S1. Among the selected DFT methods, we considered 5 standard functionals not including dispersion (BP86,<sup>2</sup> RevTPSS,<sup>3</sup> B3LYP,<sup>4</sup> PBE0<sup>5</sup> and  $\omega$ B97X,<sup>6</sup> 2 functionals designed to include dispersion effects at an electronic level (M06<sup>7</sup> and MN15<sup>8</sup>) and 7 DFT methods adding dispersion energy corrections in the protocol (BP86-D3(BJ), B3LYP-D3(BJ), PBE0-D3(BJ), TPSS-D3(BJ) and  $\omega$ B97X-D3<sup>9</sup>). With this purpose, the coordinates from the crystal structures were subjected to DFT geometry optimization in the gas phase using the cc-pVDZ-PP[Ru] basis set (see Computational methods for a description) and the computed distances for 12 ruthenium-ligand bonds (Ru-C, Ru-N, Ru-O and Ru-Cl) were compared to the corresponding bond distances determined by X-ray diffraction analysis (see Table S1). The best performances were observed for  $\omega$ B97X-D3 and M06 functionals, which showed the smallest mean unsigned errors (MUE) for the selected interatomic distances (MUEs close to 0.008 Å).<sup>10</sup> BP86, B3LYP, and RevTPSS optimized bond distances also agreed satisfactorily with the reference values (with MUEs lower than 0.01 Å). The largest deviation from experiment were associated to MN15 and PBE0 functionals (MUEs close to of 0.02 Å). Inclusion of the Grimme's model for dispersion correction with the original D3<sup>11</sup> or the Becke-Johnson damping function (D3(BJ))<sup>12</sup> to M06 or B3LYP had small effects on the calculated distances but, going from BP86, PBE0 or RevTPSS to BP86-D3(BJ), PBE0-D3(BJ) and TPSS-D3(BJ), respectively, the agreement between the calculated and the experimental distances was clearly reduced.<sup>13</sup> For  $\omega$ B97X-D3, the best performing functional, the change of the basis set and ruthenium pseudopotential from cc-pVDZ-PP[Ru] to def2-SVP reduced the agreement of the computed distances with the experimental ones (MUE increased from 0.0079 to 0.0113 Å). Thus, among the best performers, we considered the

M06 as the functional of choice, due to its broad success for the estimation stabilities of conformers, binding energies and barrier heights in transition metal chemistry,<sup>14</sup> particularly in the area of ruthenium-based catalysts.<sup>15</sup> Also selected  $\omega$ B97X-D3 as a suitable functional for comparison purposes, due to its accuracy for the evaluation of non-covalent interactions and its performance for the thermodynamic and kinetic estimations according to MOR41<sup>16</sup> and MOBH35<sup>17</sup> benchmark databases.

**Solvation models.** Looking for a compromise between computational cost and accuracy, we have selected the conductor-like polarizable continuum (CPCM) solvation model for performing the geometry optimizations. CPCM model is integrated in all parts of ORCA program, including analytical calculation of Hessians and frequencies. Conversely, analytical Hessians and frequencies are not yet implemented for the solvation model based on density (SMD) and it is necessary to switch to the numerical calculation. It is well known that calculations of numerical frequencies are inherently less accurate and quite more expensive than the analytical ones. This can become a very important limitation for studies challenging many reaction manifolds, where a considerable number of intermediates have to be characterized in multiple conformations. This issue may also become critical for the location of transition state structures, usually requiring several evaluations of the Hessian in the protocol. In addition, we expected small changes in our benchmark energies when switching between SMD and CPCM models for geometry optimization, as structural changes resulting from the use of different DFT methods (and/or basis sets) in geometry optimization has been reported to produce a small impact in the DLPNO-CCSD(T) energies, usually lower than 1 kcal/mol (see reference 40c in the main article). Trying to maintain simplicity and consistency in our computational scheme, we also selected the CPCM solvation model for the final single point energy calculations. Nevertheless, as the SMD solvation model provides a more realistic description of the non-electrostatic solute-solvent interactions and is recommended for the estimation of the solvation energies of charged species, we also performed benchmark energy evaluations with the SMD model and compared them with the results using the CPCM model.

**Refined DFT energy evaluations.** We considered three double-hybrid functionals, B2K-PLYP,<sup>18</sup> B2GP-PLYP<sup>19</sup> and PWPB95<sup>20</sup> (alone and including D3(BJ) or D4 dispersion energy corrections) which were shown to outperform to most of the tested DFT methods in the MOR41 and the MOBH35 databases and were reported as especially suitable for transition metal thermochemistry. We also selected one hybrid GGA and two hybrid meta-GGA DFT methods of lower computational cost with

different schemes for the treatment of the dispersion corrections. Thus, we considered PBE0-D3BJ (with atom-pairwise Grimme's dispersion corrections with a Becke-Johnson damping scheme), wB97M-V<sup>21</sup> (range-separated hybrid with VV10 non-local correlation), and highly parameterized M06-2X<sup>22</sup> (constructed to account for dispersion). The two last were recommended for systems where non-covalent interactions, hydrogen bonds or interactions between ions and aromatic rings may be of relevance,<sup>23</sup> while the two first functionals are among the best hybrid DFT methods according to the MOR41 or MOBH35 benchmark databases.

## Computational methods

Full geometry optimizations for all the molecular structures were performed in the self-consistent reaction field <sup>24</sup> of implicit methanol with two different hybrid functionals, M06 <sup>7</sup> and  $\omega$ B97X-D3 <sup>8</sup>, using the cc-pVDZ-PP[Ru] basis set (see below for a description). Calculations with the M06 method were performed with GAUSSIAN 16 <sup>25</sup> program using the integral equation formalism variant for the polarizable continuum model (IEF-PCM) <sup>26</sup> while those made with the  $\omega$ B97X-D3 method were performed with the ORCA program (version 5.0.3) <sup>27</sup> and the conductor like polarizable continuum model (CPCM).<sup>28</sup> For all the located stationary points different orientations of the *p*-cymene ring were assessed and the lowest energy structures and energies are reported. Vibrational frequencies were calculated analytically at the same level to ensure that each minimum was a true local minimum (only positive frequencies) and that each transition structure had only a single imaginary frequency (negative eigenvalue in the Hessian matrix, associated with the normal mode connecting reactant to product). These calculations were also used to extract thermodynamic corrections. Intrinsic Reaction Coordinates (IRC) <sup>29</sup> were employed to verify the connection of relevant transition structures to the respective minima.

The difference between the Gibbs and electronic energies (G-E) were determined at two different conditions. Since entropic contribution calculated within the ideal gas approximation at 1 atm is likely exaggerating the expected values in the condensed phase, the thermochemical analysis was first performed including a correction for the change in standard state from gas phase at 1 atm to 1 M. To further model the reduction of the translational degrees of freedom at the concentration of liquid solvent, a second thermochemical analysis was performed following the proposal by Martin, Hay and Pratt.<sup>30</sup> With this purpose, the necessary pressure parameter was derived from  $P = (d/M)*RT$  (where *M* and *d* are the molar mass and the density of the solvent, respectively, and *T* is the temperature) by using *M* = 32.04 g/mol and *d* = 787 g/L for liquid methanol. Thus, a second set of entropy corrections was obtained at condensed phase with a pressure parameter of 601 atm to achieve a methanol concentration of 24.56 M. In all calculations a quasi-harmonic-oscillator approximation (qh) was used in which the treatment of the vibrational entropies switches from the standard rigid-rotor-harmonic-oscillator model to a free rotor description for frequencies below 100 cm<sup>-1</sup>, as first proposed by Grimme.<sup>31</sup> All these thermodynamic corrections were calculated at *T* = 298.15 K, by using ORCA or applying the GoodVibes program <sup>32</sup> to the output files generated by GAUSSIAN 16.

Refined energies were obtained from single-point energy calculations with ORCA (version 5.0.3) at the DLPNO-CCSD(T)<sup>33</sup> level of theory, using the accurate iterative (T<sub>1</sub>) algorithm for the perturbative triples correction<sup>34</sup> and the NormalPNO threshold settings,<sup>35</sup> with the energies extrapolated to the complete basis set limit (CBS). SCF energies were extrapolated with the method of Petersson *et al*<sup>36</sup> by using the cc-pVTZ-PP[Ru] and cc-pVQZ-PP[Ru] basis sets, while the correlation energies were extrapolated with the method of Helgaker *et al*<sup>37</sup> by using the cc-pVDZ-PP[Ru] and cc-pVTZ-PP[Ru] basis sets. The optimum values for the parameters required in the CBS extrapolations ( $\alpha(3/4) = 5.46$  and  $\beta(2/3) = 2.46$ ) were taken from the literature.<sup>38</sup> Additional single-point energy evaluations were performed with ORCA (version 4.2.1)<sup>39</sup> using the PWPB95,<sup>20</sup> B2GP-PLYP,<sup>19</sup> B2K-PLYP,<sup>18</sup> wB97M-V,<sup>21</sup> M06-2X<sup>22</sup> and PBE0<sup>5</sup> functionals with the aug-cc-pVTZ-PP[Ru] basis set. The atom-pairwise Grimme's dispersion corrections with either the Becke-Johnson damping scheme (D3BJ)<sup>12</sup> or the 4<sup>th</sup> generation charge dependent scheme (D4)<sup>40</sup> were calculated for the PBE0 and PWP95 functionals using the DFT-D3 (version 3.1) and DFT-D4 (version 2.5) programs, respectively. All the single point energy evaluations were performed with implicit solvation in methanol (by using CPCM or SMD solvation models).<sup>28</sup> Thus, all energies given in text are quasi-harmonic Gibbs energies of solutes in the solution phase, which were calculated by adding the qh-G corrections to the refined single point energies calculated in solution.

With cc-pVDZ-PP[Ru], cc-pVTZ-PP[Ru], cc-pVQZ-PP[Ru] and aug-cc-pVTZ-PP[Ru] basis sets, C, H, Cl, N and O atoms were described with the Dunning's correlation-consistent polarized double-, triple-, quadruple- or augmented triple- $\zeta$  basis sets<sup>41</sup> (cc-pVDZ, cc-pVTZ, cc-pVQZ or aug-cc-pVTZ keywords, respectively), while the inner electrons of Ru were described by the Stuttgart/Cologne fully relativistic effective core potential (ECP28MDF, replacing 28 core electrons) and the outer electrons of Ru were described by the associated double-, triple-, quadruple- or augmented triple- $\zeta$  basis set (ECP28MDF\_VDZ, ECP28MDF\_VTZ, ECP28MDF\_VQZ or ECP28MDF\_AVTZ, using the cc-pVDZ-PP, cc-pVTZ-PP, cc-pVQZ-PP or aug-cc-pVTZ-PP keywords).<sup>42,43</sup>

Calculations in ORCA were performed with "TightSCF" convergence criteria and the default frozen-core approximation for the MP2 part. To speed up the SCF calculations, resolution-of-identity (RI) method<sup>44</sup> was used with def2/J,<sup>45</sup> cc-pVnZ/C and cc-pVnZ-PP/C (where n = D, T or Q) or aug-cc-pVTZ/C and aug-cc-pVTZ-PP/C auxiliary basis sets<sup>46</sup> in conjunction with the RIJCOSX<sup>47</sup> approximation. DFT integration grids with 99 radial and 590 angular points were used in GAUSSIAN 16 ("ultrafine" integration grid) and the equivalent "Grid6" and "GridX6" were used with ORCA 4.2.1.

## References

- 1 (a) J. P. Cerón-Carrasco, J. Ruiz, C. Vicente, C. de Haro, D. Bautista, J. Zúñiga and A. Requena *J. Chem. Theory Comput.* **2017**, *13*, 3898–3910. (b) A. Poater, E. Pump, S. V. C. Vummaleti, and L. Cavallo *J. Chem. Theory Comput.* **2014**, *10*, 4442–4448. (c) Y. Minenkov, A. Singstad, G. Occhipinti, and V. R. Jensen, *Dalton Trans.* **2012**, *41*, 5526–5541. (d) A. D. Kulkarni and D. G. Truhlar *J. Chem. Theory Comput.* **2011**, *7*, 2325–2332.
- 2 (a) A. D. Becke *Phys. Rev. A*, **1988**, *38*, 3098-3100. (b) J. P. Perdew *Phys. Rev. B*, **1986**, *33*, 8822-8824.
- 3 (a) J. P. Perdew, A. Ruzsinsky, G. I. Csonka, L. A. Constantin, and J. Sun, *Phys. Rev. Lett.* **2009**, *103*, 026403. (b) J. P. Perdew, A. Ruzsinsky, G. I. Csonka, L. A. Constantin, and J. Sun, *Phys. Rev. Lett.* **2011**, *106*, 179902.
- 4 P. J. Stephens, F. J. Devlin, C. F. Chabalowski, and M. J. Frisch, *J. Phys. Chem.* **1994**, *98*, 11623-11627.
- 5 C. Adamo and V. Barone *J. Chem. Phys.*, **1999**, *110*, 6158-6170.
- 6 J.-D. Chai and M. Head-Gordon *J. Chem. Phys.* **2008**, *128*, 084106.
- 7 Y. Zhao and D. G. Truhlar, *Theor. Chem. Acc.*, **2008**, *120*, 215-241.
- 8 H. S. Yu, X. He, S. L. Li, and D. G. Truhlar *Chemical Science* **2016**, *7*, 5032-5051.
- 9 S. Dohm, A. Hansen, M. Steinmetz, S. Grimme, and M. P. Checinski. *J. Chem. Theory Comput.* **2018**, *14*, 2596–2608.
- 10 The performance of M06 and wb97BX-D for predicting structural parameters of ruthenium complexes have been previously reported superior to BP86, B3LYP or PBE0 and comparable to that achieved with MP2, see refs. 1(a), 1(b) and 1(d).
- 11 S. Grimme, J. Antony, S. Ehrlich, and H. Krieg *J. Chem. Phys.* **2010**, *132*, 154104S.
- 12 S. Grimme, S. Ehrlich and L. Goerigk *J. Comp. Chem.* **2011**, *32*, 1456-1465.
- 13 The inclusion of dispersion corrections (D3) on the geometry optimizations of ruthenium complexes with either BP86 or B3LYP functionals has been previously reported to give less reproducibility with respect to the experimental data, see ref. 1(b).
- 14 (a) M. S. G. Ahlquist, and P.-O. Norrby *Angew. Chem. Int. Ed.* **2011**, *50*, 11794-11797. (b) B. B. Averkiev, Y. Zhao, and D. G. Truhlar *J. Mol. Catal. A* **2010**, *324*, 80-88. (c) Y. Minenkov, G. Occhipinti, and V. R. Jensen *J. Phys. Chem. A* **2009**, *113*, 11833–11844.
- 15 (a) P. Sliwa, and J. Handzlik *Chem. Phys. Lett.* **2010**, *493*, 273-278. (b) I. C. Stewart, D. Benitez, D. J. O’Leary, E. Tkatchouk, M. W. Day, W. A. Goddard III, and R. H. Grubbs *J. Am. Chem. Soc.* **2009**, *131*, 1931-1938. (c)

- D. Benitez, E. Tkatchouk, and W. A. Goddard III *Organometallics*, **2009**, *28*, 2643-2645. (d) Y. Zhao, and D. G. Truhlar *Acc. Chem. Res.* **2008**, *41*, 157-167.
- 16 S. Dohm, A. Hansen, M. Steinmetz, S. Grimme, and M. P. Checinski. *J. Chem. Theory Comput.* **2018**, *14*, 2596–2608.
- 17 M. A. Iron, and T. Janes, *J. Phys. Chem. A* **2019**, *123*, 3761-3781.
- 18 A. Tarnopolsky, A. Karton, R. Sertchook, D. Vuzman, and J. M. L. Martin *J. Phys. Chem. A* **2008**, *112*, 3–8.
- 19 A. Karton, A. Tarnopolsky, J.-F. Lamère, G. C. Schatz, and J. M. L. Martin *J. Phys. Chem. A* **2008**, *112*, 12868-12886.
- 20 L. Goerigk, and S. J. Grimme, *Chem. Theory Comput.* **2011**, *7*, 291-309.
- 21 (a) N. Mardirossian, and M. Head-Gordon *J. Chem. Phys.* **2016**, *144*, 214110. In ORCA dispersion is included into  $\omega$ B97M-V functional by using the VV10 nonlocal correlation as a non-self-consistent correction to the final SCF energy. See: (b) A. Najibi, and L. Goerigk *J. Chem. Theory Comput.* **2018**, *14*, 5725–5738; (c) O. A. Vydrov, and T. Van Voorhis *J. Chem. Phys.* **2010**, *133*, 244103.
- 22 Y. Zhao, and D. G. Truhlar *Theor. Chem. Acc.* **2008**, *120*, 215-241.
- 23 (a) N. Mardirossian and M. Head-Gordon *Molecular Physics* **2017**, *115*, 2315-2372. (b) A. D. Boese *Chem. Phys. Chem* **2015**, *16*, 978-985. (c) D. Papp, P. Rovó, I. Jáklí, A. G. Császár and A. Perczel *J. Comput. Chem.* **2017**, *38*, 1762-1773.
- 24 (a) V. Dillet, D. Rinaldi, and J. L. Rivail *J. Phys. Chem.* **1994**, *98*, 5034-5039. (b) V. Dillet, D. Rinaldi, J. Bertran, and J. L. Rivail, *J. Chem. Phys.* **1996**, *104*, 9437-9444. (c) For a review on quantum mechanical continuum solvation models, see: J. Tomasi, B. Mennucci, and R. Cammi *Chem. Rev.* **2005**, *105*, 2999-3093.
- 25 Gaussian 16, Revision C.01, M. J. Frisch, G. W. Trucks, H. B. Schlegel, G. E. Scuseria, M. A. Robb, J. R. Cheeseman, G. Scalmani, V. Barone, G. A. Petersson, H. Nakatsuji, X. Li, M. Caricato, A. V. Marenich, J. Bloino, B. G. Janesko, R. Gomperts, B. Mennucci, H. P. Hratchian, J. V. Ortiz, A. F. Izmaylov, J. L. Sonnenberg, D. Williams-Young, F. Ding, F. Lipparini, F. Egidi, J. Goings, B. Peng, A. Petrone, T. Henderson, D. Ranasinghe, V. G. Zakrzewski, J. Gao, N. Rega, G. Zheng, W. Liang, M. Hada, M. Ehara, K. Toyota, R. Fukuda, J. Hasegawa, M. Ishida, T. Nakajima, Y. Honda, O. Kitao, H. Nakai, T. Vreven, K. Throssell, J. A. Montgomery, Jr., J. E. Peralta, F. Ogliaro, M. J. Bearpark, J. J. Heyd, E. N. Brothers, K. N. Kudin, V. N. Staroverov, T. A. Keith, R. Kobayashi, J. Normand, K. Raghavachari, A. P. Rendell, J. C. Burant, S. S. Iyengar, J. Tomasi, M. Cossi, J. M. Millam, M. Klene, C. Adamo, R. Cammi, J. W. Ochterski, R. L. Martin, K. Morokuma, O. Farkas, J. B. Foresman, and D. J. Fox, Gaussian, Inc., Wallingford CT, 2019.



- 26 The IEF-PCM parameters were selected for pure methanol as solvent (dielectric constant of 32.613) and atomic radii from universal force field were used for the solute atomic radii. See: E. Cancès, B. Mennucci, and J. Tomasi, *J. Chem. Phys.* **1997**, *107*, 3032-3041.
- 27 F. Neese *WIREs Comput. Mol. Sci.* **2022**, *12*:e1606 (DOI: 10.1002/wcms.1606).
- 28 (a) V. Barone and M. Cossi *J. Phys. Chem. A*, **1998**, *102*, 1995-2001. (b) A. V. Marenich, C. J. Cramer, and D. G. Truhlar *J. Phys. Chem. B* 2009, **113**, 6378–6396.
- 29 K. Fukui *Acc. Chem. Res.*, 1981, **14**, 363-68.
- 30 R. L. Martin, P. J. Hay, L. R. Pratt. *J. Phys. Chem. A* 1998, **102**, 3565–3573.
- 31 S. Grimme *Chem. Eur. J.* **2012**, *18*, 9955–9964.
- 32 G. Luchini, J. V. Alegre-Requena, I. Funes-Ardoiz, R. S. Paton *F1000Research*, **2020**, *9*, 291.
- 33 (a) C. Riplinger and F. Neese, *J. Chem. Phys.*, **2013**, *138*, 034106. (b) C. Riplinger, P. Pinski, U. Becker, E. F. Valeev and F. Neese *J. Chem. Phys.*, **2016**, *144*, 024109.
- 34 (a) Y. Guo, C. Riplinger, U. Becker, D. G. Liakos, Y. Minenkov, L. Cavallo, and F. Neese *J. Chem. Phys.* **2018**, *148*, 011101. (b) Y. Guo, C. Riplinger, D. G. Liakos, U. Becker, M. Saitow, and F. Neese *J. Chem. Phys.* **2020**, *152*, 024116.
- 35 D. G. Liakos, M. Sparta, M. K. Kesharwani, J. M. L. Martin, and F. Neese, *J. Chem. Theory Comput.* **2015**, *11*, 1525–1539.
- 36 S. J. Zhong, E. C. Barnes, and G. A. Petersson *J. Chem. Phys.* **2008**, *129*, 184116.
- 37 T. Helgaker, W. Klopper, H. Koch, and J. Noga *J. Chem. Phys.* **1997**, *106*, 9639-9646.
- 38 F. Neese, A. Hansen, and D. G. Liakos *J. Chem. Phys.* **2009**, *131*, 064103.
- 39 (a) F. Neese *Computational Molecular Science*, **2012**, *2*, 73-78; (b) Neese, F. *Wiley Interdisciplinary Reviews: Computational Molecular Science*, **2017**, *8*, e1327.
- 40 E. Caldeweyher, S. Ehlert, A. Hansen, H. Neugebauer, S. Spicher, C. Bannwarth, and S. Grimme *J. Chem. Phys.* **2019**, *150*, 154122 (and *ChemRxiv* 2019, DOI: [10.26434/chemrxiv.7430216.v2](https://doi.org/10.26434/chemrxiv.7430216.v2)).
- 41 (a) T. H. Jr. Dunning *J. Chem. Phys.*, **1989**, *90*, 1007-1023; (b) R. A. Kendall, T. H. Jr. Dunning, and R. J. Harrison *J. Chem. Phys.*, **1992**, *96*, 6796-6806; (c) D. E. Woon and T. H. Jr. Dunning *J. Chem. Phys.*, **1993**, *98*, 1358-1371.
- 42 K. A. Peterson, D. Figgen, M. Dolg, and H. Stoll *J. Chem. Phys.* **2007**, *126*, 124101.

- 43 Stuttgart/Cologne effective core potentials for Ru and the associated basis set were obtained from the web of the group (<http://www.tc.uni-koeln.de/PP/index.en.html>) and used in the GAUSSIAN calculations via the GENIECP keyword.
- 44 (a) K. Eichkorn, O. Treutler, H. Öhm, M. Häser, and R. Ahlrichs, *Chem. Phys. Lett.* **1995**, *240*, 283–290. (b) F. Weigend, and M. Häser *Theor. Chem. Acc.* **1997**, *97*, 331-340.
- 45 F. Weigend *Phys. Chem. Chem. Phys.* **2006**, *8*, 1057–1065.
- 46 F. Weigend, A. Kohn, and C. Hattig *J. Chem. Phys.* **2002**, *116*, 3175-3183.
- 47 (a) F. Neese, F. Wennmohs, A. Hansen, and U. Becker *Chem. Phys.* **2009**, *356*, 98-109. (b) R. Izsak, and F. Neese *J. Chem. Phys.* **2011**, *135*, 144105.

**Figure S1.** Structures derived from X-ray diffraction analysis and CSD deposit codes for the evaluation set.

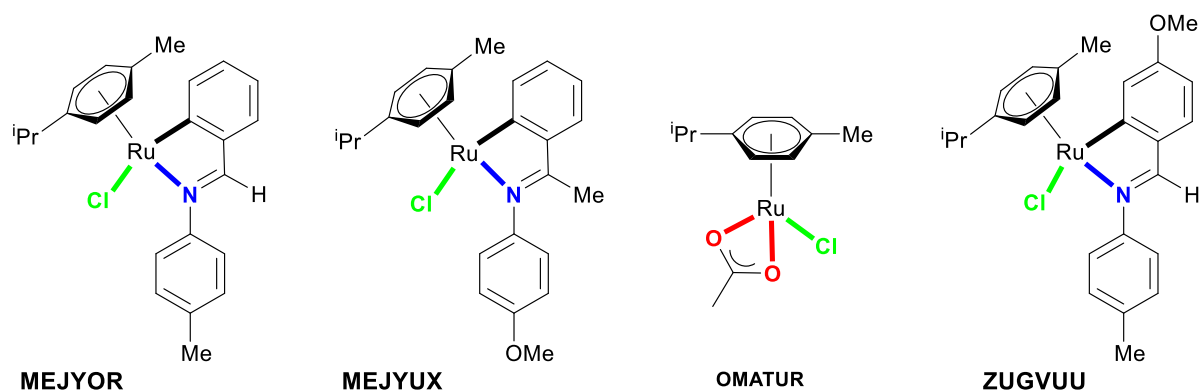

**Table S1.** Computed bond distances at DFT/cc-PVDZ-PP[Ru] levels and mean unsigned errors (MUEs).

| METHOD           | Distances (Å) |        |        |        |        |        |        |        |        |        |        |        | MUE (Å) |
|------------------|---------------|--------|--------|--------|--------|--------|--------|--------|--------|--------|--------|--------|---------|
|                  | MEJYOR        |        |        | MEJYUX |        |        | OMATUR |        |        | ZUGVUU |        |        |         |
|                  | Ru-C          | Ru-N   | Ru-Cl  | Ru-C   | Ru-N   | Ru-Cl  | Ru-O1  | Ru-O2  | Ru-Cl  | Ru-C   | Ru-N   | Ru-Cl  |         |
| X-Ray            | 2.0463        | 2.1115 | 2.4161 | 2.0460 | 2.1160 | 2.4150 | 2.1660 | 2.1510 | 2.3890 | 2.0480 | 2.0966 | 2.4183 |         |
| $\omega$ B97X-D3 | 2.0527        | 2.1033 | 2.4146 | 2.0474 | 2.1033 | 2.4235 | 2.1512 | 2.1463 | 2.3677 | 2.0530 | 2.1043 | 2.4156 | 0.0079  |
| M06              | 2.0543        | 2.1045 | 2.4242 | 2.0498 | 2.1022 | 2.4313 | 2.1620 | 2.1563 | 2.3763 | 2.0565 | 2.1092 | 2.4251 | 0.0084  |
| M06-D3           | 2.0540        | 2.1013 | 2.4244 | 2.0481 | 2.1037 | 2.4307 | 2.1623 | 2.1565 | 2.3762 | 2.0556 | 2.1054 | 2.4255 | 0.0085  |
| BP86             | 2.0420        | 2.0931 | 2.4177 | 2.0370 | 2.0892 | 2.4253 | 2.1560 | 2.1558 | 2.3739 | 2.0384 | 2.0811 | 2.4146 | 0.0088  |
| B3LYP            | 2.0509        | 2.1169 | 2.4286 | 2.0443 | 2.1114 | 2.4365 | 2.1513 | 2.1528 | 2.3881 | 2.0466 | 2.1082 | 2.4257 | 0.0090  |
| RevTPSS          | 2.0454        | 2.0784 | 2.4114 | 2.0459 | 2.0916 | 2.4194 | 2.1451 | 2.1418 | 2.3692 | 2.0512 | 2.0992 | 2.4143 | 0.0092  |
| $\omega$ B97X    | 2.0598        | 2.1227 | 2.4202 | 2.0529 | 2.1197 | 2.4304 | 2.1569 | 2.1513 | 2.3733 | 2.0598 | 2.1247 | 2.4222 | 0.0103  |
| B3LYP-D3BJ       | 2.0394        | 2.0869 | 2.4169 | 2.0364 | 2.0829 | 2.4251 | 2.1557 | 2.1469 | 2.3779 | 2.0339 | 2.0797 | 2.4135 | 0.0111  |
| TPSS-D3BJ        | 2.0454        | 2.0784 | 2.4114 | 2.0432 | 2.0759 | 2.4182 | 2.1478 | 2.1418 | 2.3703 | 2.0470 | 2.0822 | 2.4125 | 0.0155  |
| PBE0             | 2.0353        | 2.0893 | 2.3993 | 2.0300 | 2.0861 | 2.4063 | 2.1345 | 2.1309 | 2.3585 | 2.0369 | 2.0926 | 2.4001 | 0.0183  |
| BP86-D3BJ        | 2.0305        | 2.0631 | 2.4065 | 2.0287 | 2.0615 | 2.4147 | 2.1579 | 2.1531 | 2.3640 | 2.0324 | 2.0684 | 2.4081 | 0.0196  |
| MN15             | 2.0419        | 2.0799 | 2.3945 | 2.0388 | 2.0814 | 2.4000 | 2.1143 | 2.1182 | 2.3583 | 2.0432 | 2.0825 | 2.3951 | 0.0227  |
| PBE0-D3BJ        | 2.0299        | 2.0732 | 2.3946 | 2.0261 | 2.0715 | 2.4015 | 2.1557 | 2.1469 | 2.3779 | 2.0309 | 2.0763 | 2.3954 | 0.0251  |

**Scheme S1.** Routes for C-H activation at Ru(II) arene complexes featuring a protic directing-group. (DG stands for directing-group, X stands for chloro or acetate).

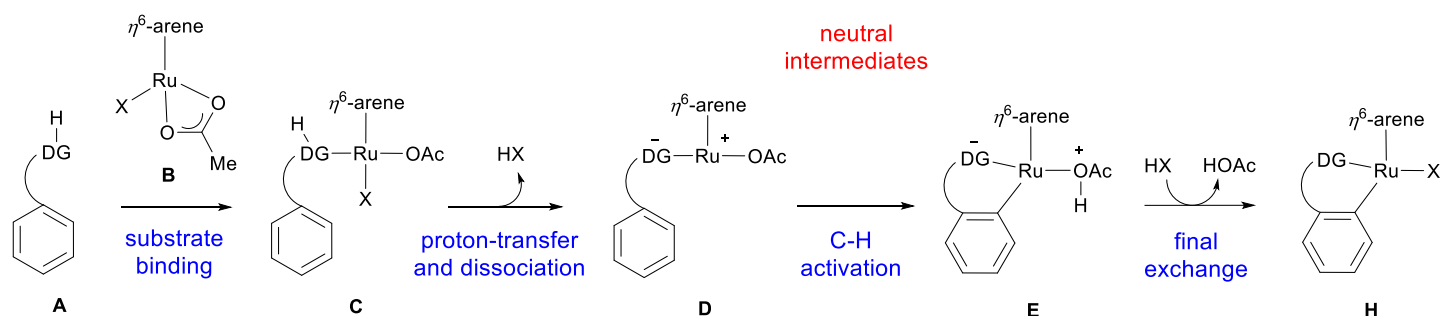

**Scheme S2.** Initial steps for the reaction of ruthenium dimeric precursor ( $B^0$ ) with acetate to form the monomer derivatives  $B^1$  and  $B^2$ . Relative quasi-harmonic free energies (in kcal/mol) calculated at DLPNO-CCSD(T)/CBS(CPCM) level (298 K, 1 M) using the geometries optimized at M06/cc-pVDZ-PP[Ru](IEF-PCM) level in methanol are shown in blue color. The corresponding values calculated at the same level by using the geometries optimized at  $\omega$ B97X-D3/cc-pVDZ-PP[Ru](CPCM) level are shown in red color and between brackets.

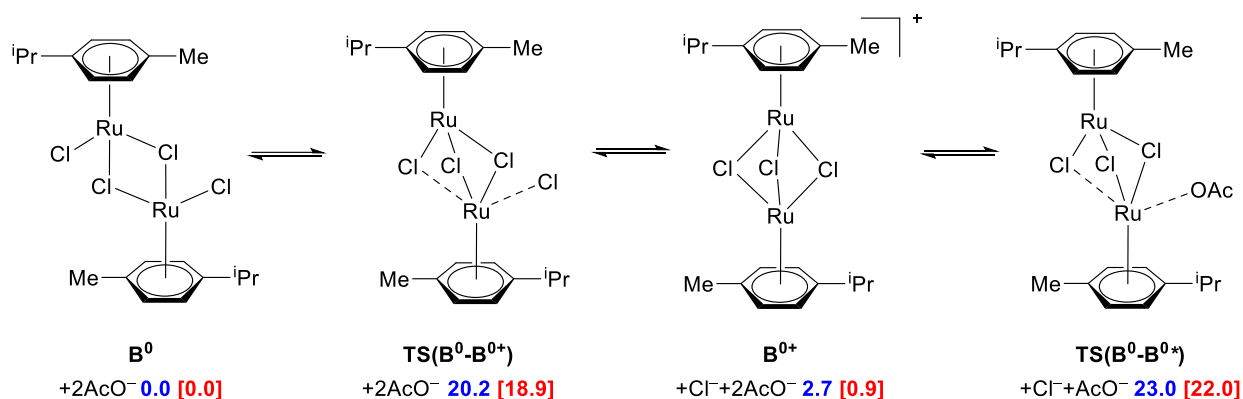

**Scheme S3.** Solvent-assisted dissociation of *p*-cymene from  $B^2$  to form free *p*-cymene and mono-, di- or three-solvated Ru(OAc)<sub>2</sub> complexes. Relative quasi-harmonic free energies (in kcal/mol) calculated at DLPNO-CCSD(T)/CBS(CPCM) level (298 K, 1 M) on the geometries optimized at M06/cc-pVDZ-PP[Ru](IEF-PCM) level in methanol are shown in blue color. The corresponding values calculated at the same level at condensed phase (298 K, 24.6 M) are shown in green color. *S* stands for solvent (MeOH) and *p*-cym for the *p*-cymene ligand.

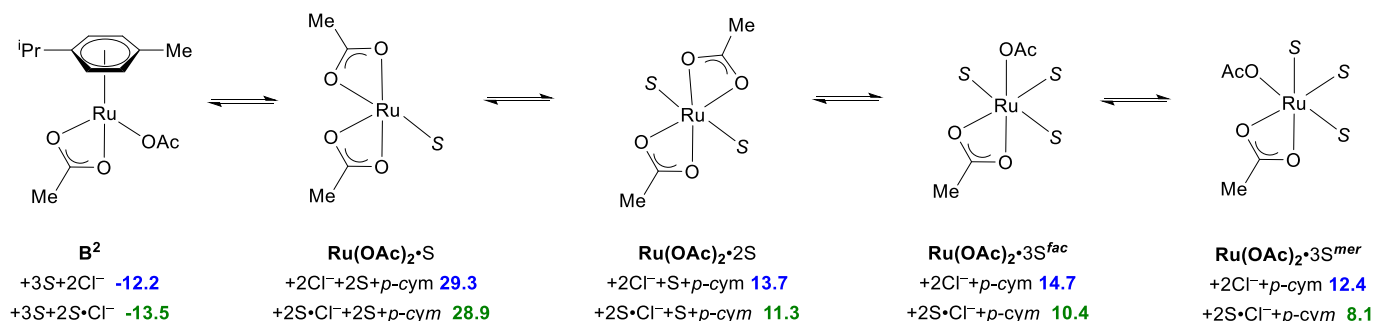

**Scheme S4a.** Formation of key cationic ruthenium intermediate  $D^+$  via transition state structure  $TS(C^1-D^+)$ . (A) Relative quasi-harmonic free energies (in kcal/mol) calculated at DLPNO-CCSD(T)/CBS(CPCM) level (298 K, 1 M) on the geometries optimized at  $\omega$ B97X-D3/cc-pVDZ-PP[Ru](IEF-PCM) level in methanol are shown in red color. The corresponding values calculated at the same level at condensed phase (298 K, 24.6 M) are shown in green color. S stands for solvent (MeOH). (B) 3D CYLview representations for the IRC path calculated at  $\omega$ B97X-D3/cc-pVDZ-PP[Ru](IEF-PCM) level in methanol from  $TS(C^1-D^+)$ , showing relevant distances in Ångstroms.

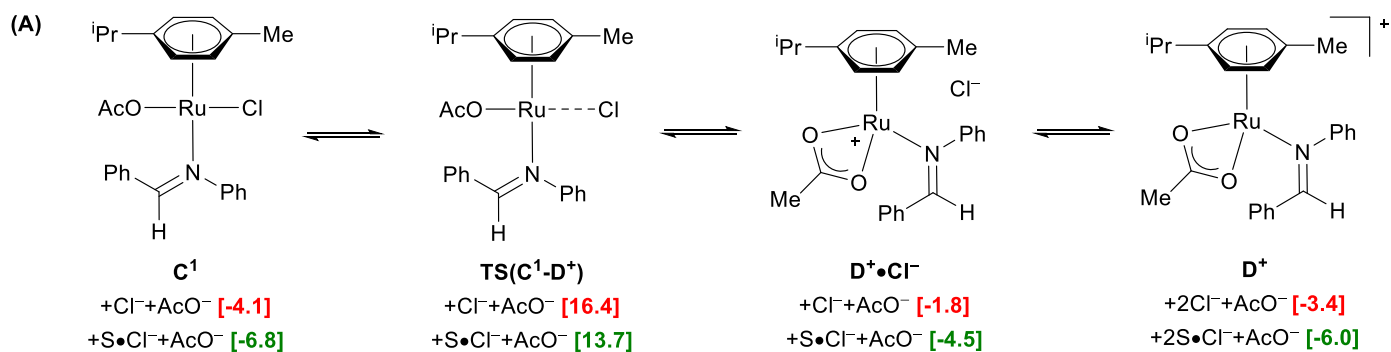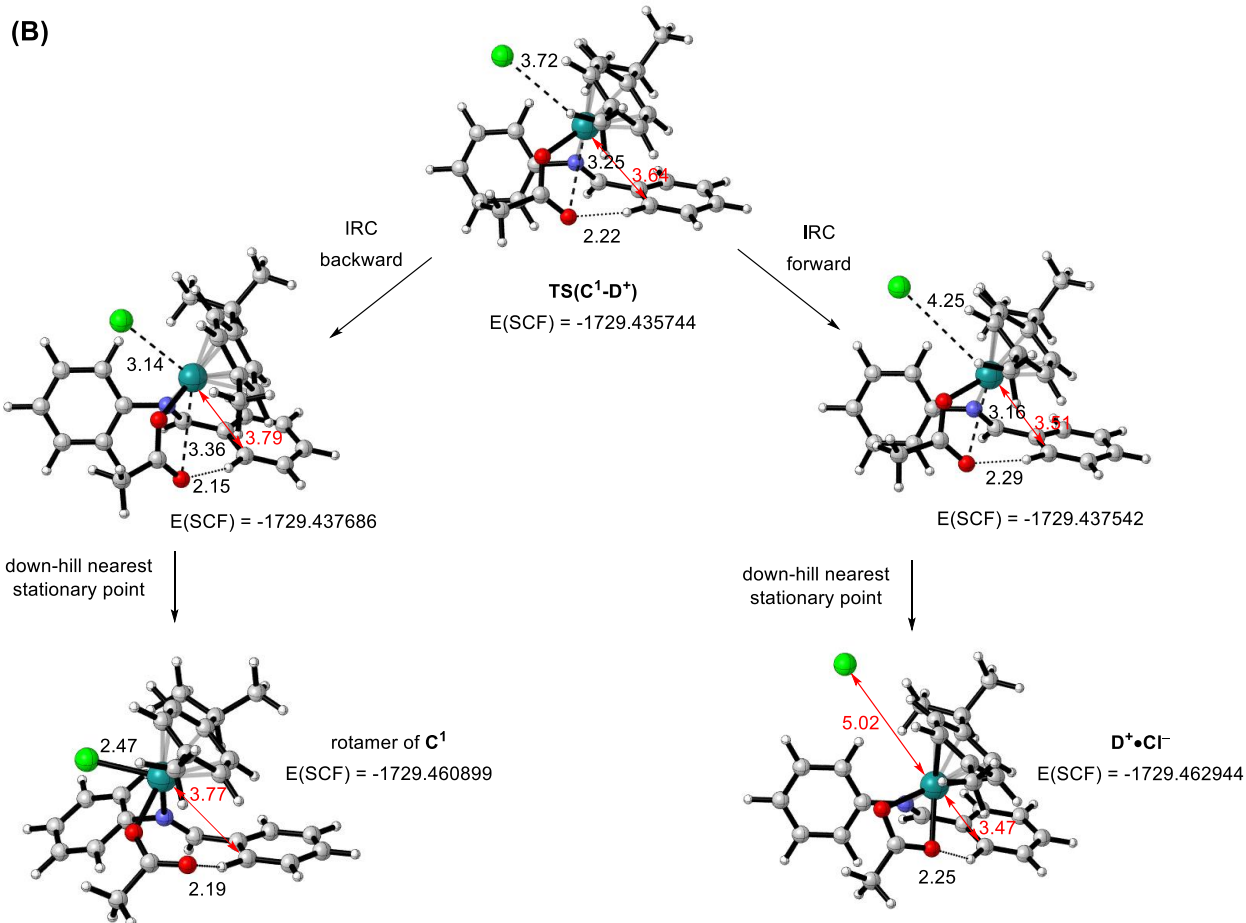

**Scheme S4b.** Formation of key cationic ruthenium intermediate  $D^+$  via transition state structure  $TS(C^2-D^+)$ .

(A) Relative quasi-harmonic free energies (in kcal/mol) calculated at DLPNO-CCSD(T)/CBS(CPCM) level (298 K, 1 M) on the geometries optimized at  $\omega$ B97X-D3/cc-pVDZ-PP[Ru](IEF-PCM) level in methanol are shown in red color. The corresponding values calculated at the same level at condensed phase (298 K, 24.6 M) are shown in green color. S stands for solvent (MeOH). (B) 3D CYLview representations for the IRC path from  $TS(C^2-D^+)$  calculated at  $\omega$ B97X-D3/cc-pVDZ-PP[Ru](IEF-PCM) level in methanol, showing relevant distances in Ångstroms.

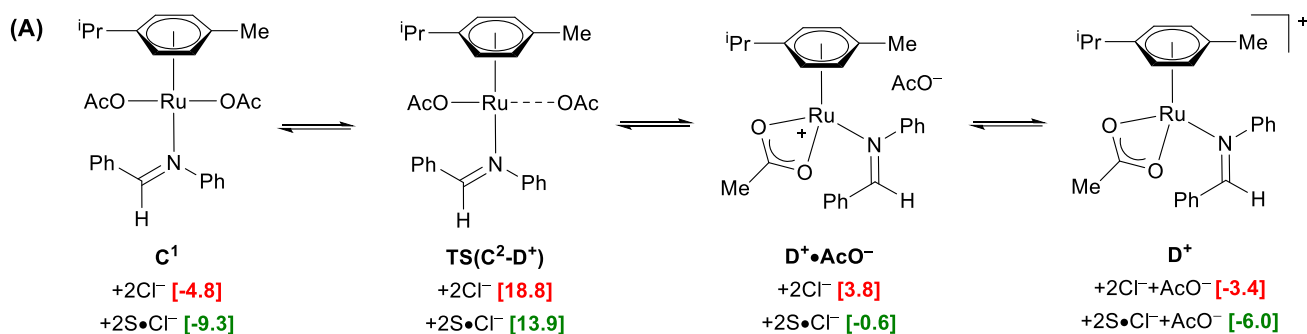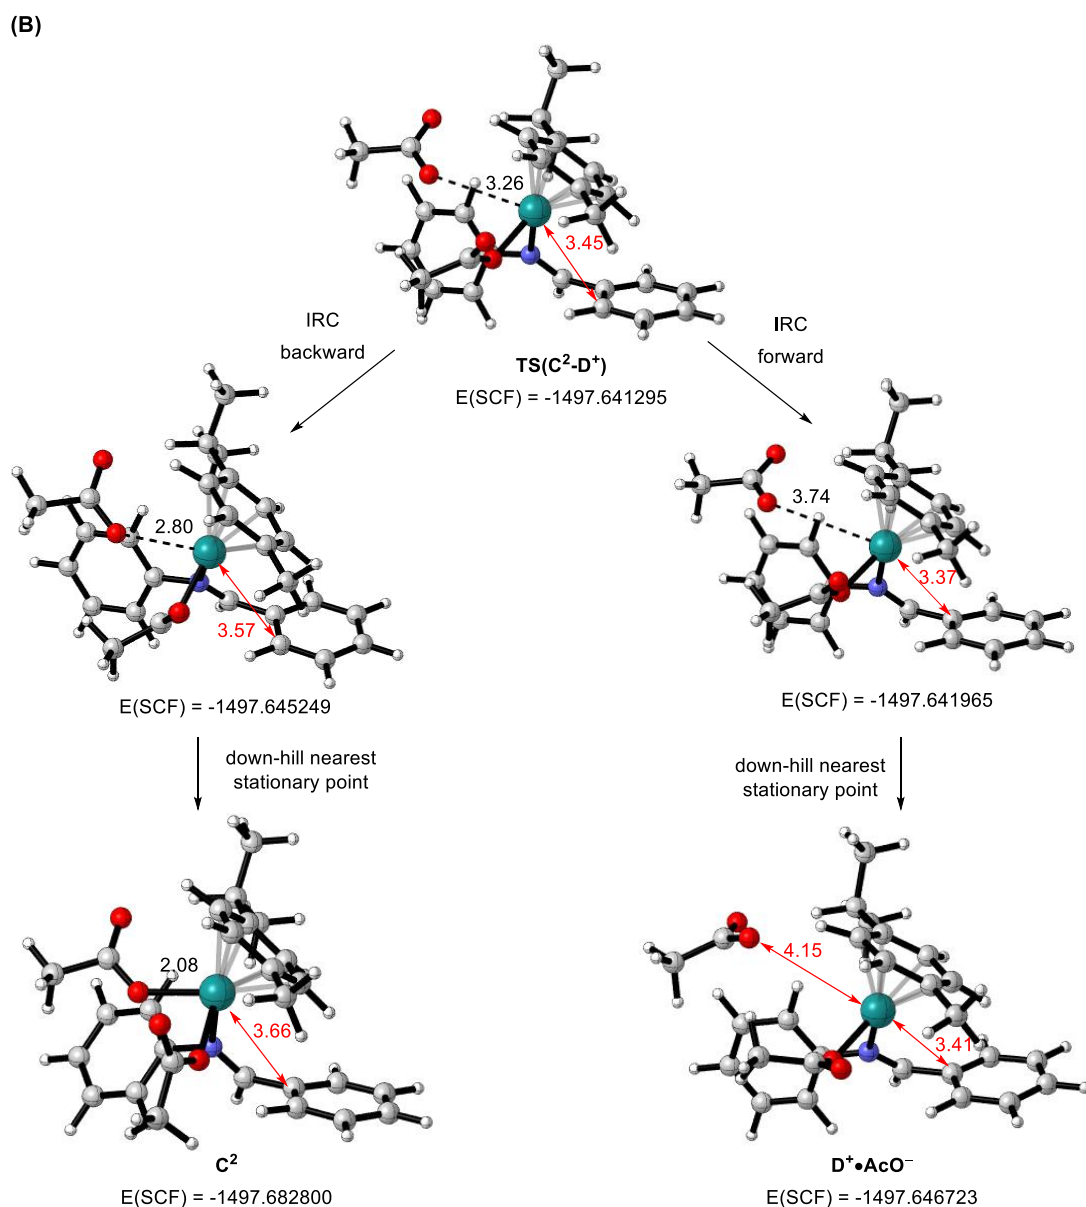

**Scheme S4c.** Reaction pathways towards  $D^+$  involving coordination of the ligand (**A**) to the unsolvated or the solvated cationic precursor ( $B^+$  and  $B^{+S}$ , respectively). Relative quasi-harmonic free energies (in kcal/mol) calculated at DLPNO-CCSD(T)/CBS(CPCM) level (298 K, 1 M) using the geometries optimized at M06/cc-pVDZ-PP[Ru](IEF-PCM) level in methanol are shown in blue color. The corresponding values calculated at the same level in condensed phase (298 K, 24.6 M) are shown in green color. *S* stands for solvent (MeOH).

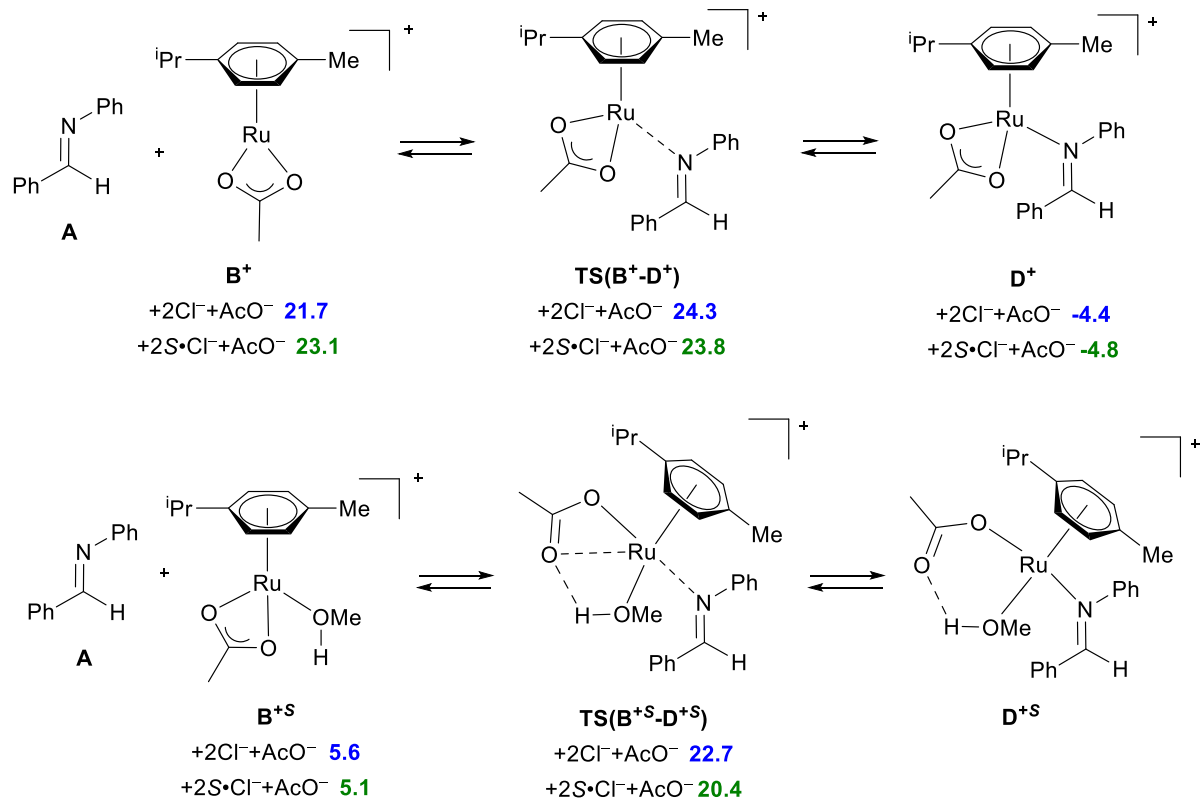

**Chart S1.** Constrained energy profile for *p*-cymene dissociation from  $F^c$  leading to **F**. Relative quasi-harmonic free energies (in kcal/mol) calculated for **TS(F<sup>c</sup>-F)** at DLPNO-CCSD(T)/CBS(CPCM) level (298 K, 1 M) on the geometries optimized at  $\omega$ B97X-D3/cc-pVDZ-PP[Ru](CPCM) level in methanol.

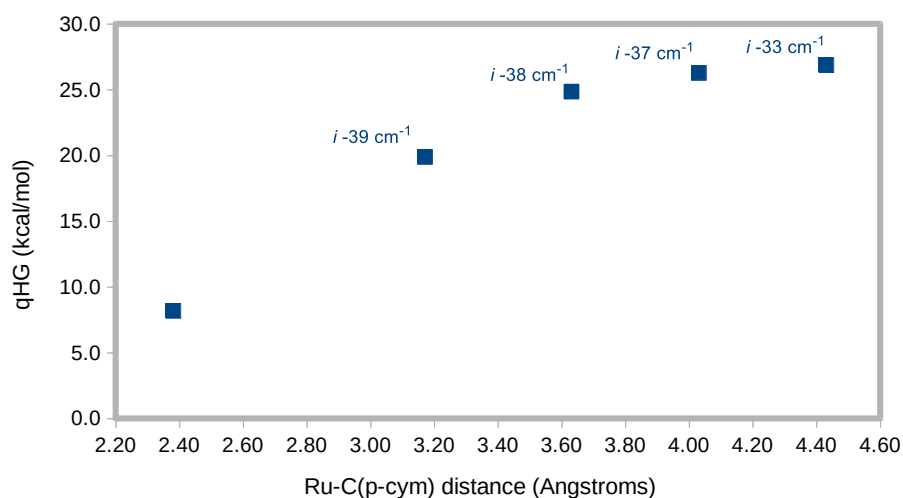

**Scheme S5a.** Transition state structures **TS(F-F<sup>A</sup>)** towards bis-imine intermediate **F<sup>A</sup>**. (A) Relative quasi-harmonic free energies (in kcal/mol) calculated at DLPNO-CCSD(T)/CBS(CPCM) level (298 K, 1 M) using the geometries optimized at M06/cc-pVDZ-PP[Ru](IEF-PCM) level in methanol are shown in blue color. The corresponding values calculated at the same level by using the geometries optimized at  $\omega$ B97X-D3/cc-pVDZ-PP[Ru](CPCM) level are shown in red color and between brackets. (B) 3D CYLview representations for the IRC paths from **TS(F-F<sup>A</sup>)** calculated at  $\omega$ B97X-D3/cc-pVDZ-PP[Ru](IEF-PCM) level in methanol, showing relevant distances in Ångstroms.

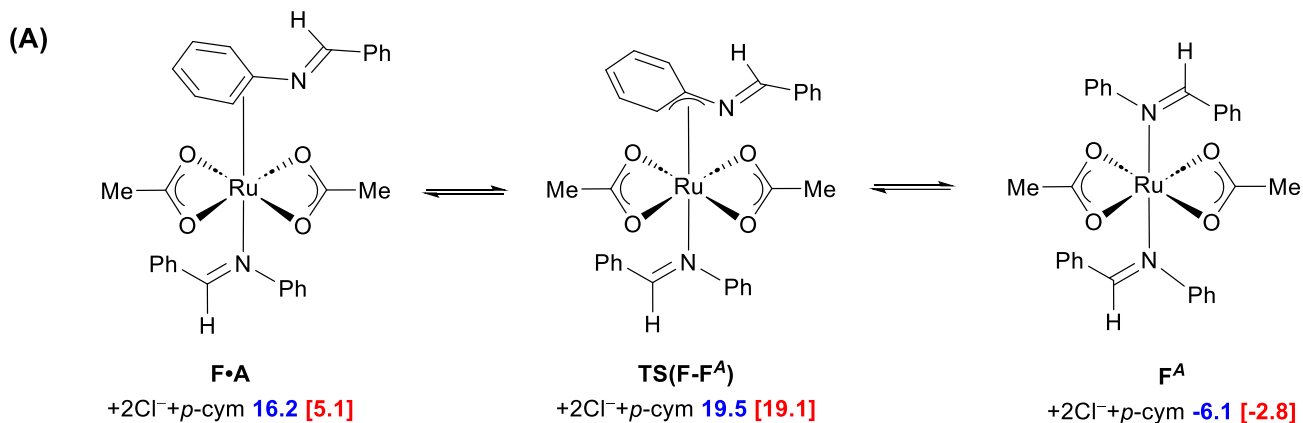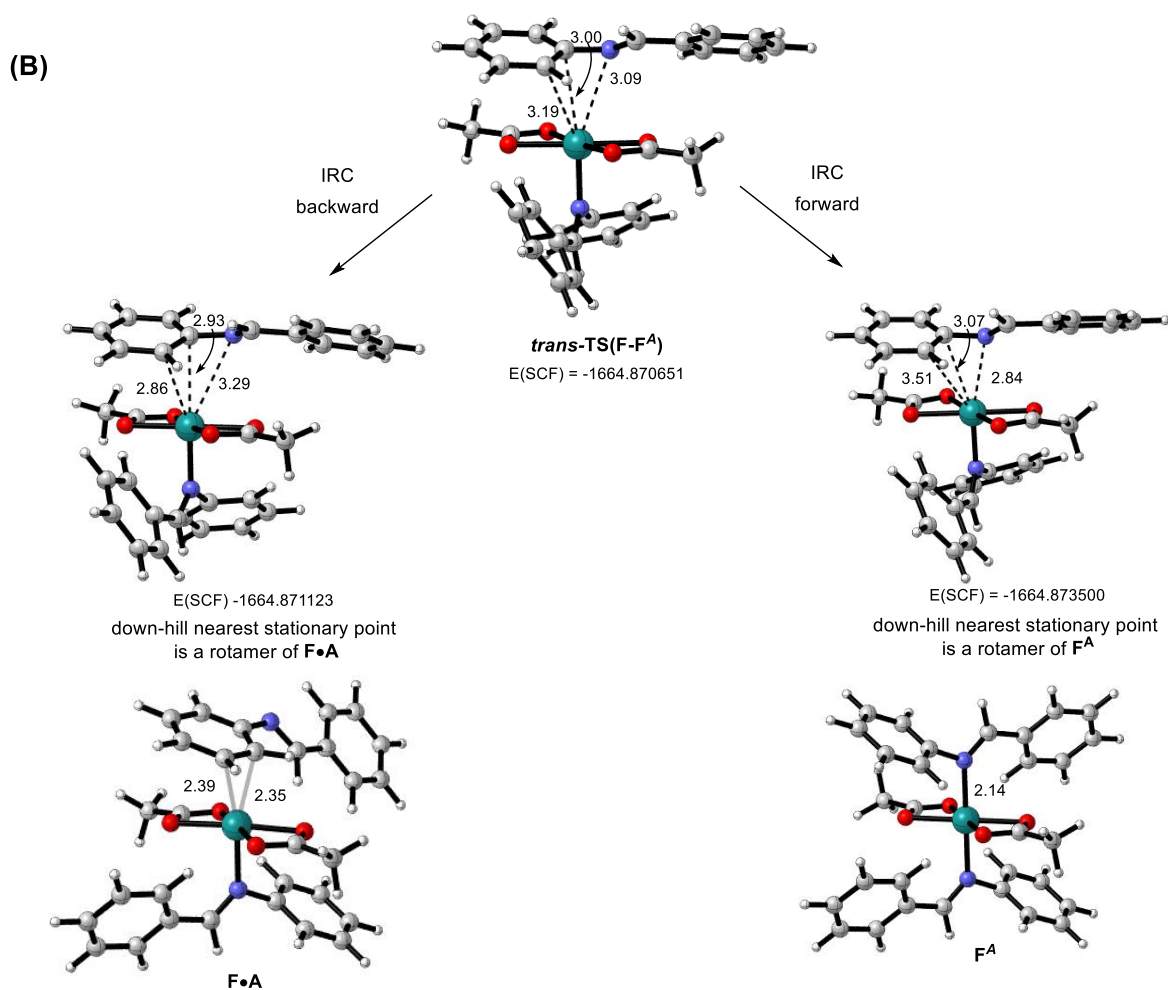



**Scheme S5b.** Alternative transition state structures **TS(F-F<sup>A</sup>)** in the dissociative pathways towards bis-imine intermediates **F<sup>A</sup>** and **cis-F<sup>A</sup>**. Relative quasi-harmonic free energies (in kcal/mol) calculated at DLPNO-CCSD(T)/CBS(CPCM) level (298 K, 1 M) using the geometries optimized at M06/cc-pVDZ-PP[Ru](IEF-PCM) level in methanol are shown in blue color. The corresponding values calculated at the same level by using the geometries optimized at  $\omega$ B97X-D3/cc-pVDZ-PP[Ru](CPCM) level are shown in red color and between brackets.

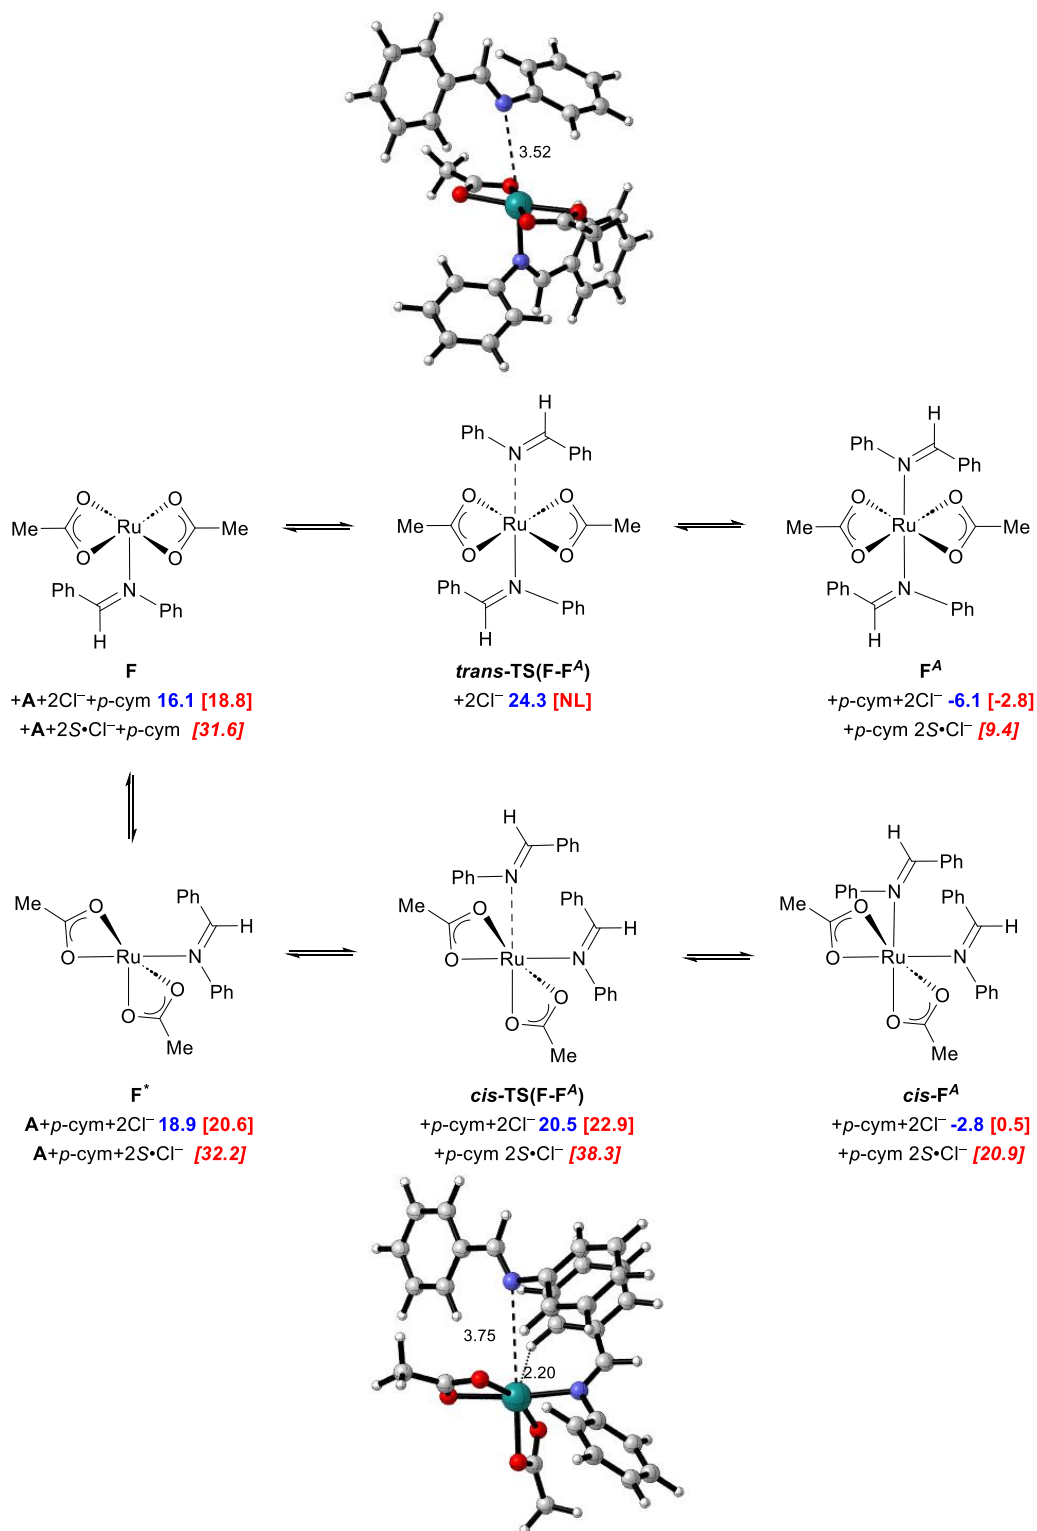

**Scheme S5c.** Solvent-assisted interchange pathways from  $F^c$  to  $F^S$  or  $F^A$ . Relative quasi-harmonic free energies (in kcal/mol) calculated at DLPNO-CCSD(T)/CBS(CPCM) level (298 K, 1 M) on the geometries optimized at M06/cc-pVDZ-PP[Ru](IEF-PCM) level in methanol are shown in blue color. The corresponding values calculated at the same level in condensed phase (298 K, 24.6 M) are shown in green color. *S* stands for solvent (MeOH) and *p-cym* for *p*-cymene.

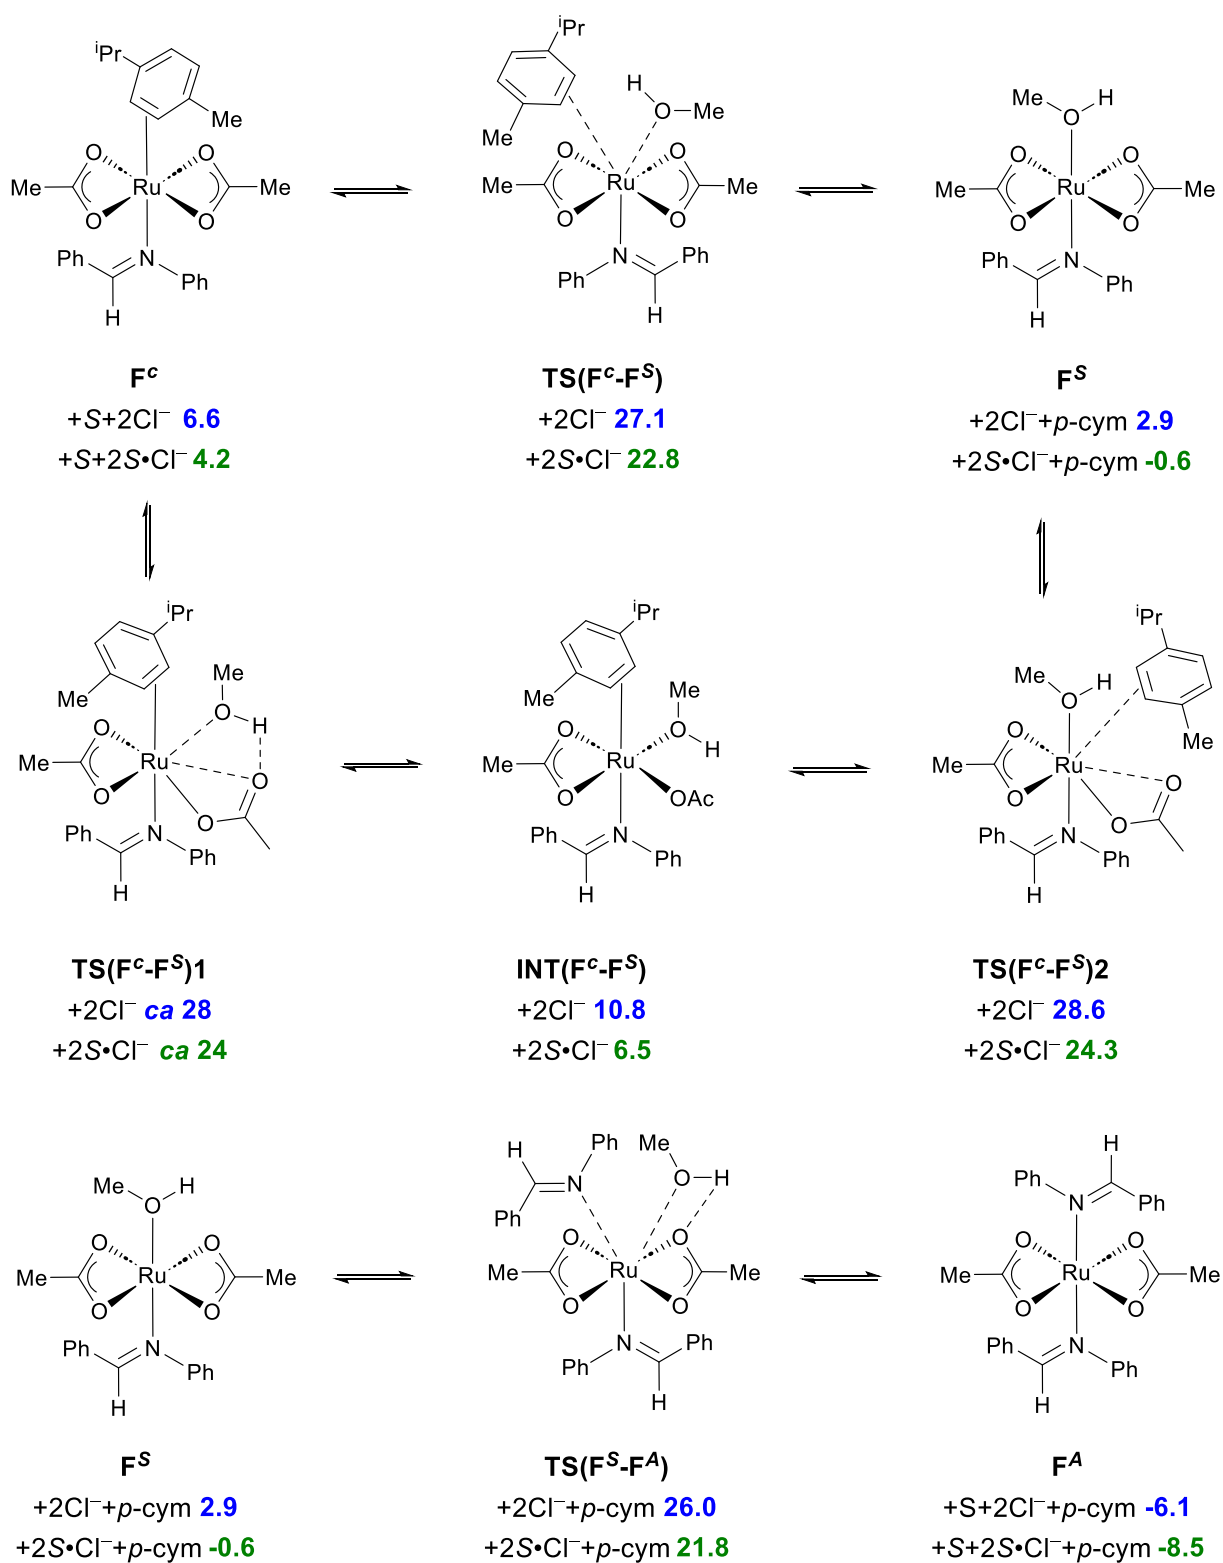

**Scheme S6.** Reaction pathway for the carboxylate-assisted C-H activation of neutral bis-imine diacetate ruthenium intermediates *cis-F<sup>A</sup>*, involving the formation of the agostic intermediate *cis-INT(F<sup>A</sup>-G<sup>A</sup>)* and subsequent intramolecular proton abstraction leading to acetate-ruthenacycle *cis-G<sup>A</sup>*. Relative quasi-harmonic free energies (in kcal/mol) calculated at DLPNO-CCSD(T)/CBS(CPCM) level (298 K, 1 M) using the geometries optimized at M06/cc-pVDZ-PP[Ru](IEF-PCM) level in methanol are shown in blue color while those values calculated by using the geometries optimized at  $\omega$ B97X-D3/cc-pVDZ-PP[Ru](CPCM) level in methanol are shown in red color and brackets. The corresponding values calculated at  $\omega$ B97X-D3/cc-pVDZ-PP[Ru](SMD) level in methanol are shown in brackets and italics. S stands for solvent (MeOH).

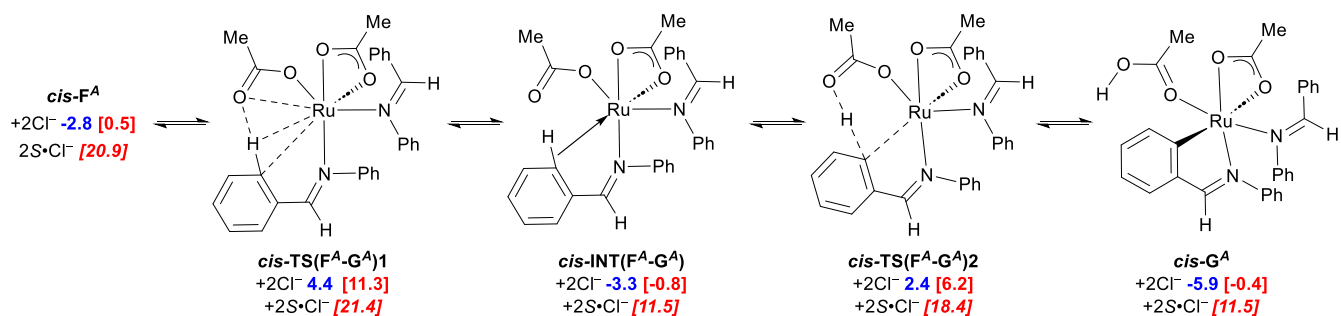

**Scheme S7.** Reaction pathway for the carboxylate-assisted C-H activation of neutral diacetate ruthenium intermediates (*F<sup>c</sup>*), involving the formation of the agostic intermediate (*INT(F<sup>c</sup>-G<sup>c</sup>)*) and subsequent intramolecular proton abstraction leading to acetate-ruthenacycle (*G<sup>c</sup>*). Relative quasi-harmonic free energies (in kcal/mol) calculated at DLPNO-CCSD(T)/CBS(CPCM) level (298 K, 1 M) using the geometries optimized at M06/cc-pVDZ-PP[Ru](IEF-PCM) level in methanol are shown in blue color while those values calculated by using the geometries optimized at  $\omega$ B97X-D3/cc-pVDZ-PP[Ru](CPCM) level in methanol are shown in red color and brackets. The corresponding values calculated at the  $\omega$ B97X-D3/cc-pVDZ-PP[Ru](SMD) level in methanol are shown in italics and brackets. S stands for solvent (MeOH).

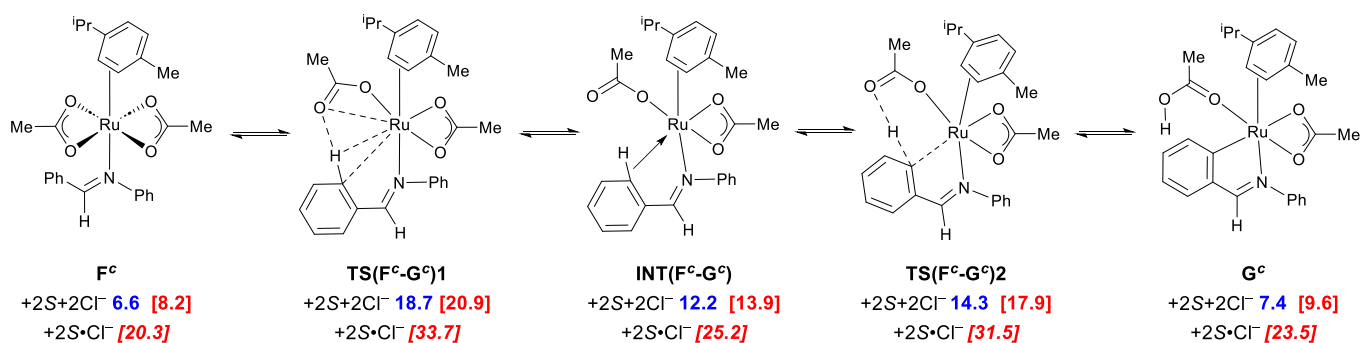

**Scheme S8.** Reaction pathway for carboxylate-assisted C-H activation of neutral monosolvated diacetate ruthenium intermediates ( $F^S$ ), involving the formation of the agostic intermediate ( $INT(F^S-G^S)$ ) and subsequent intramolecular proton abstraction leading to acetate-ruthenacycle ( $G^S$ ). Relative quasi-harmonic free energies (in kcal/mol) calculated at DLPNO-CCSD(T)/CBS(CPCM) level (298 K, 1 M) using the geometries optimized at M06/cc-pVDZ-PP[Ru](IEF-PCM) level in methanol are shown in blue color while those values calculated by using the geometries optimized at  $\omega$ B97X-D3/cc-pVDZ-PP[Ru](CPCM) level in methanol are shown in red color and brackets. The corresponding values calculated at the same levels in condensed phase (298 K, c24 M) are shown in green color. *S* stands for solvent (MeOH).

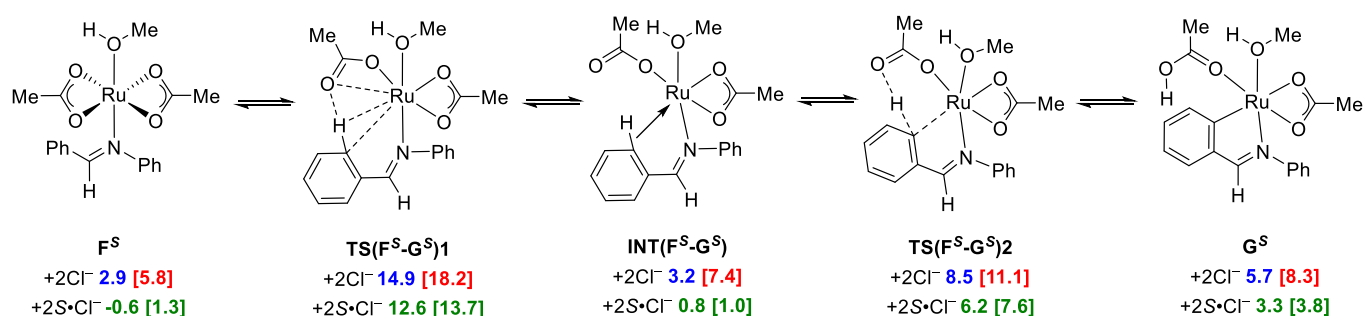

**Scheme S9.** Reaction pathway for carboxylate-assisted C-H activation of neutral disolvated diacetate ruthenium intermediates ( $F^{2S}$ ), involving the formation of the agostic intermediate ( $INT(F^{2S}-G^{2S})$ ) and subsequent intramolecular proton abstraction leading to acetate-ruthenacycle ( $G^{2S}$ ). Relative quasi-harmonic free energies (in kcal/mol) calculated at DLPNO-CCSD(T)/CBS(CPCM) level (298 K, 1 M) using the geometries optimized at M06/cc-pVDZ-PP[Ru](IEF-PCM) level in methanol are shown in blue color. The corresponding values calculated at the same levels in condensed phase (298 K, c 24 M) are shown in green color. *S* stands for solvent (MeOH).

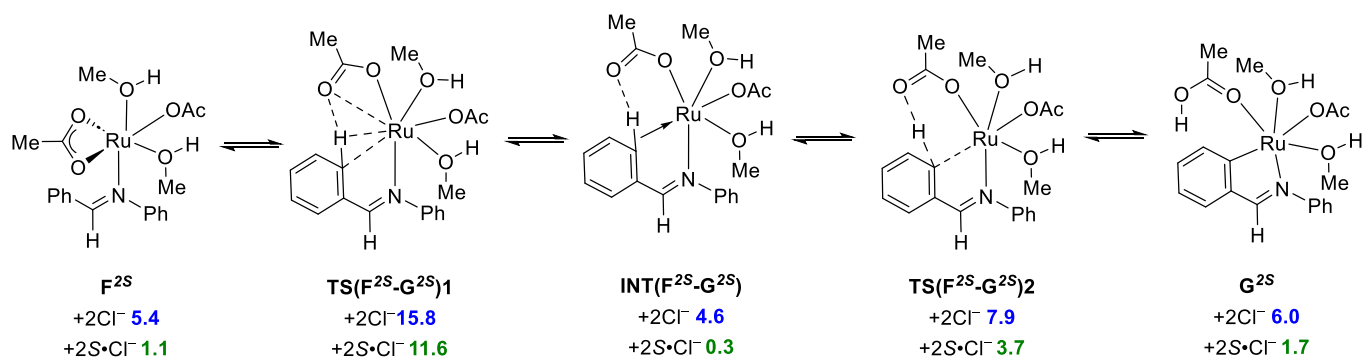

**Scheme S10a.** Formation of cationic ruthenacycle intermediate **INT(E-H)<sup>+</sup>•S** via transition state structure **TS(E-H)1•S**. (A) Relative quasi-harmonic free energies (in kcal/mol) calculated at DLPNO-CCSD(T)/CBS(CPCM) level (298 K, 1 M) on the geometries optimized at  $\omega$ B97X-D3/cc-pVDZ-PP[Ru](IEF-PCM) level in methanol are shown in red color. The corresponding values calculated at the same level at condensed phase (298 K, 24.6 M) are shown in green color. S stands for solvent (MeOH). (B) 3D CYLview representations for the IRC pathways calculated at  $\omega$ B97X-D3/cc-pVDZ-PP[Ru](IEF-PCM) level in methanol from **TS(E-H)1•S**, showing relevant distances in Ångstroms.

(A)

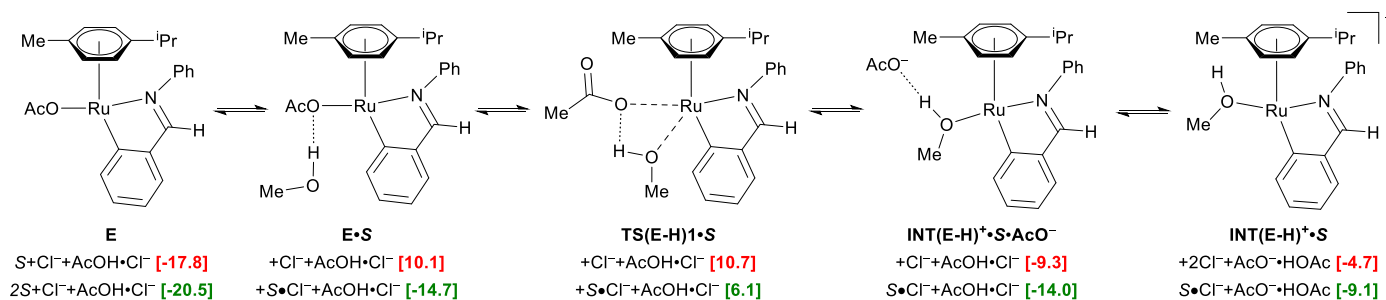

(B)

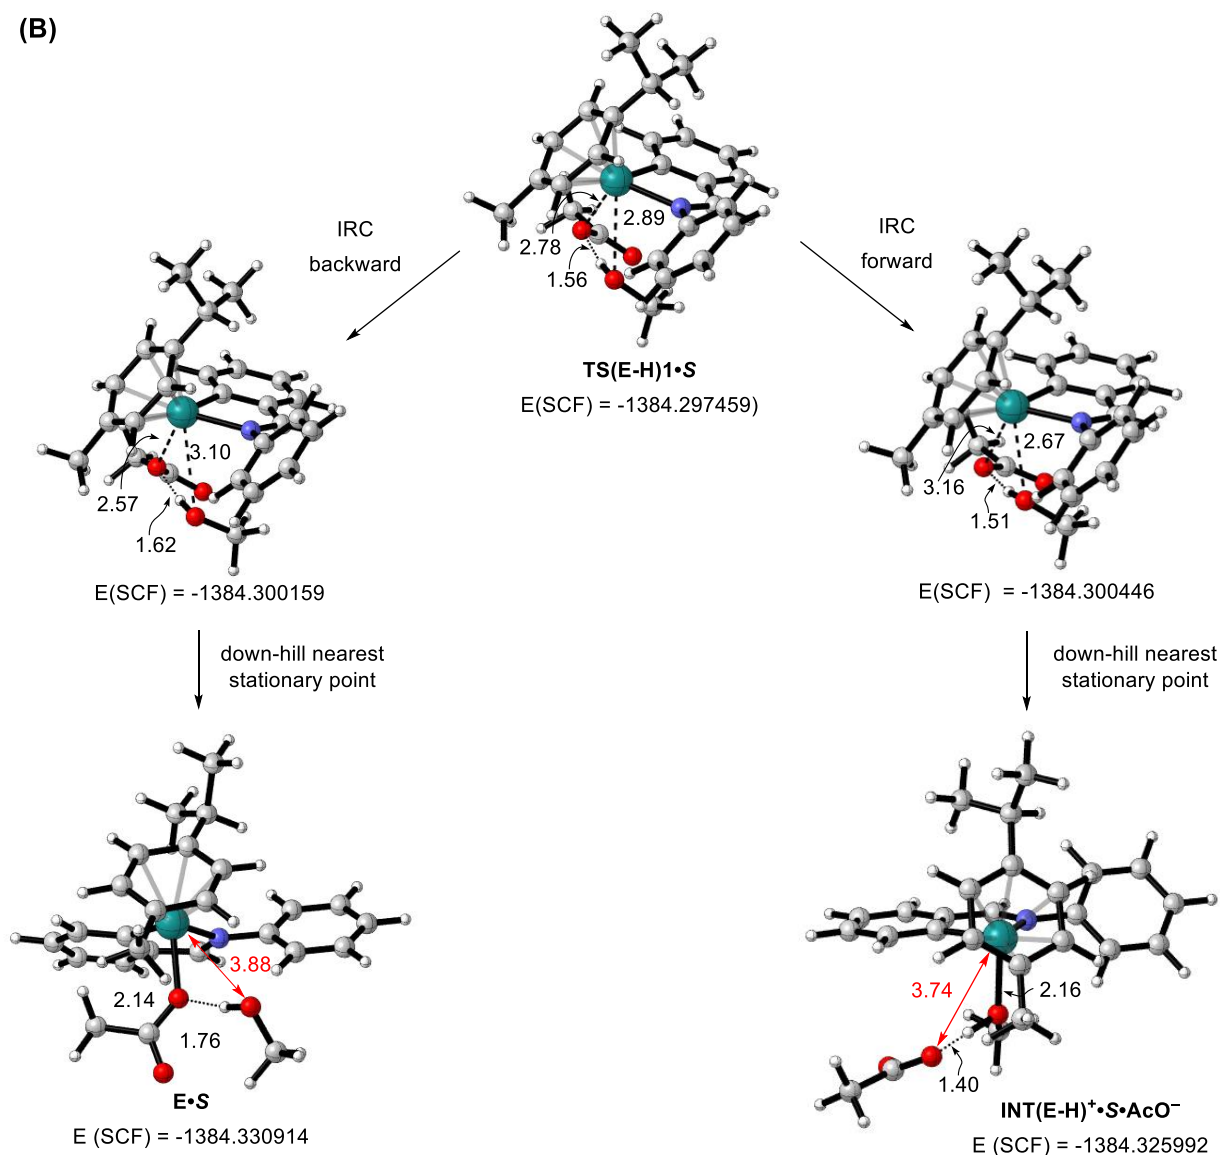

**Scheme S10b.** Formation of chloro ruthenacycle **H•S** via transition state structure **TS(E-H)2•S**. (A) Relative quasi-harmonic free energies (in kcal/mol) calculated at DLPNO-CCSD(T)/CBS(CPCM) level (298 K, 1 M) on the geometries optimized at  $\omega$ B97X-D3/cc-pVDZ-PP[Ru](IEF-PCM) level in methanol are shown in red color. The corresponding values calculated at the same level at condensed phase (298 K, 24.6 M) are shown in green color. S stands for solvent (MeOH). (B) 3D CYLview representations for the IRC pathways calculated at  $\omega$ B97X-D3/cc-pVDZ-PP[Ru](IEF-PCM) level in methanol from **TS(E-H)2•S**, showing relevant distances in Ångstroms.

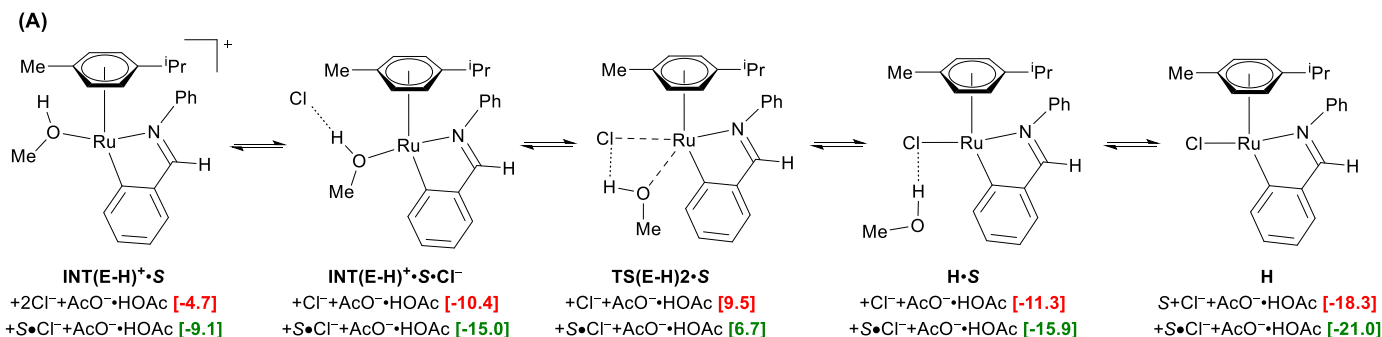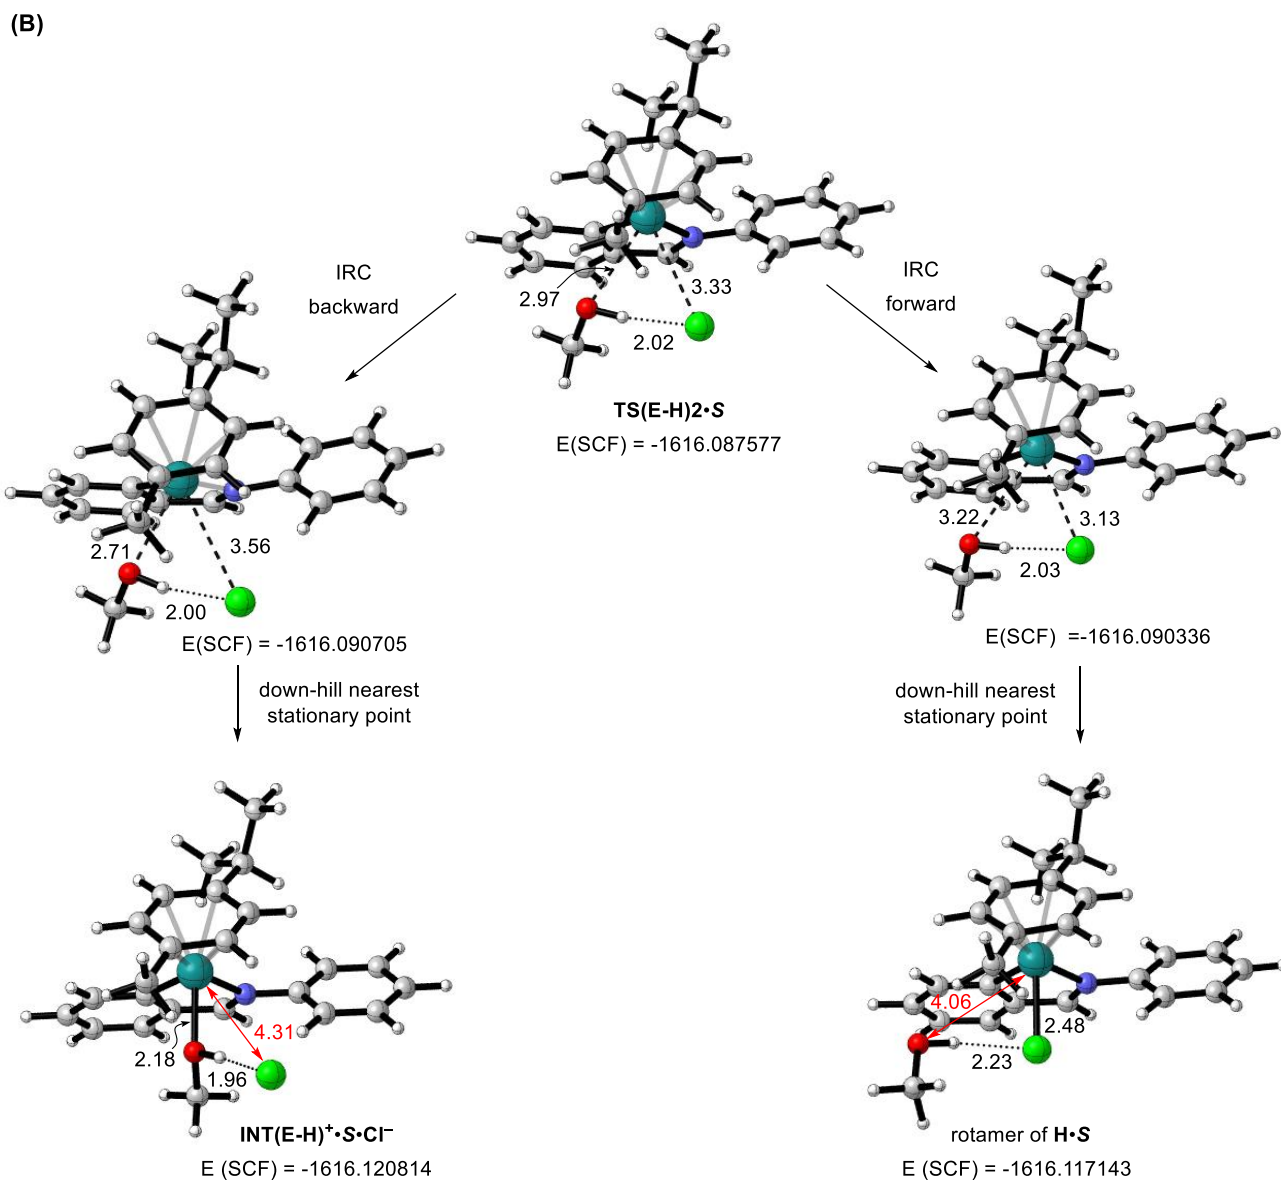

**Scheme S10c.** Direct associative route and dissociative route for acetate/chloride exchange on cycloruthenates. Relative quasi-harmonic free energies (in kcal/mol) calculated at DLPNO-CCSD(T)/CBS(CPCM) level (298 K, 1 M) on the geometries optimized at M06/cc-pVDZ-PP[Ru](IEF-PCM) level in methanol are shown in blue color. The corresponding values calculated at the same level in condensed phase (298 K, c 24 M) are shown in green color. S stands for solvent (MeOH).

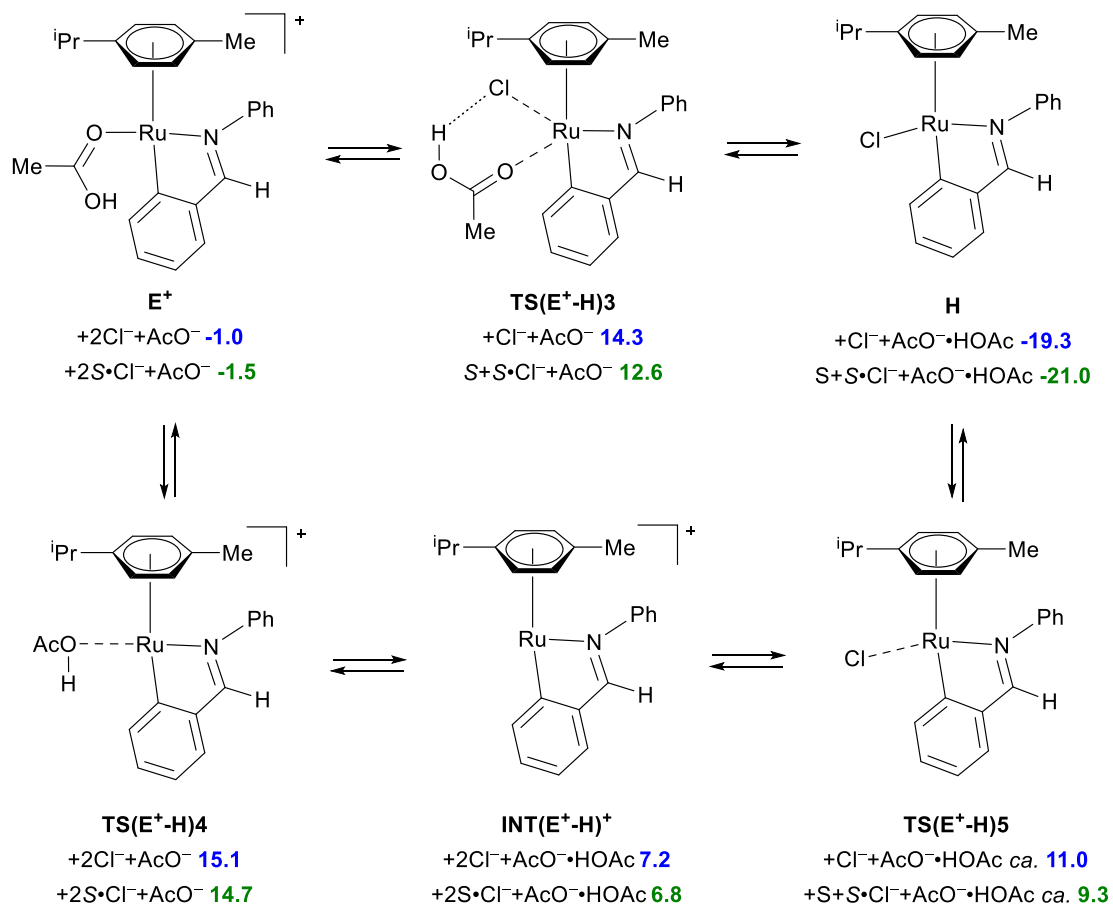

**Figure S2.** Relative quasi-harmonic Gibbs energy plots calculated at DLPNO-CCSD(T)/CBS(CPCM) level in methanol (in kcal/mol). (a) At 298 K and 1 M after geometry optimizations at  $\omega$ B97X-D3/cc-pVDZ-PP[Ru](CPCM) level. (b) At 298 K and c 24 M after geometry optimizations at M06/cc-pVDZ-PP[Ru](IEF-PCM) level, including one or two explicit MeOH molecules to monosolvate the chloride anions. Pre-activation by anion dissociation and ligand exchange processes at ruthenium are shown in black color, C-H activations involving cationic intermediates are shown towards the right in blue color and the corresponding processes involving neutral intermediates are shown towards the left in brown and green colors. The final ligand exchange processes at ruthenacycles are shown towards the right in purple color.

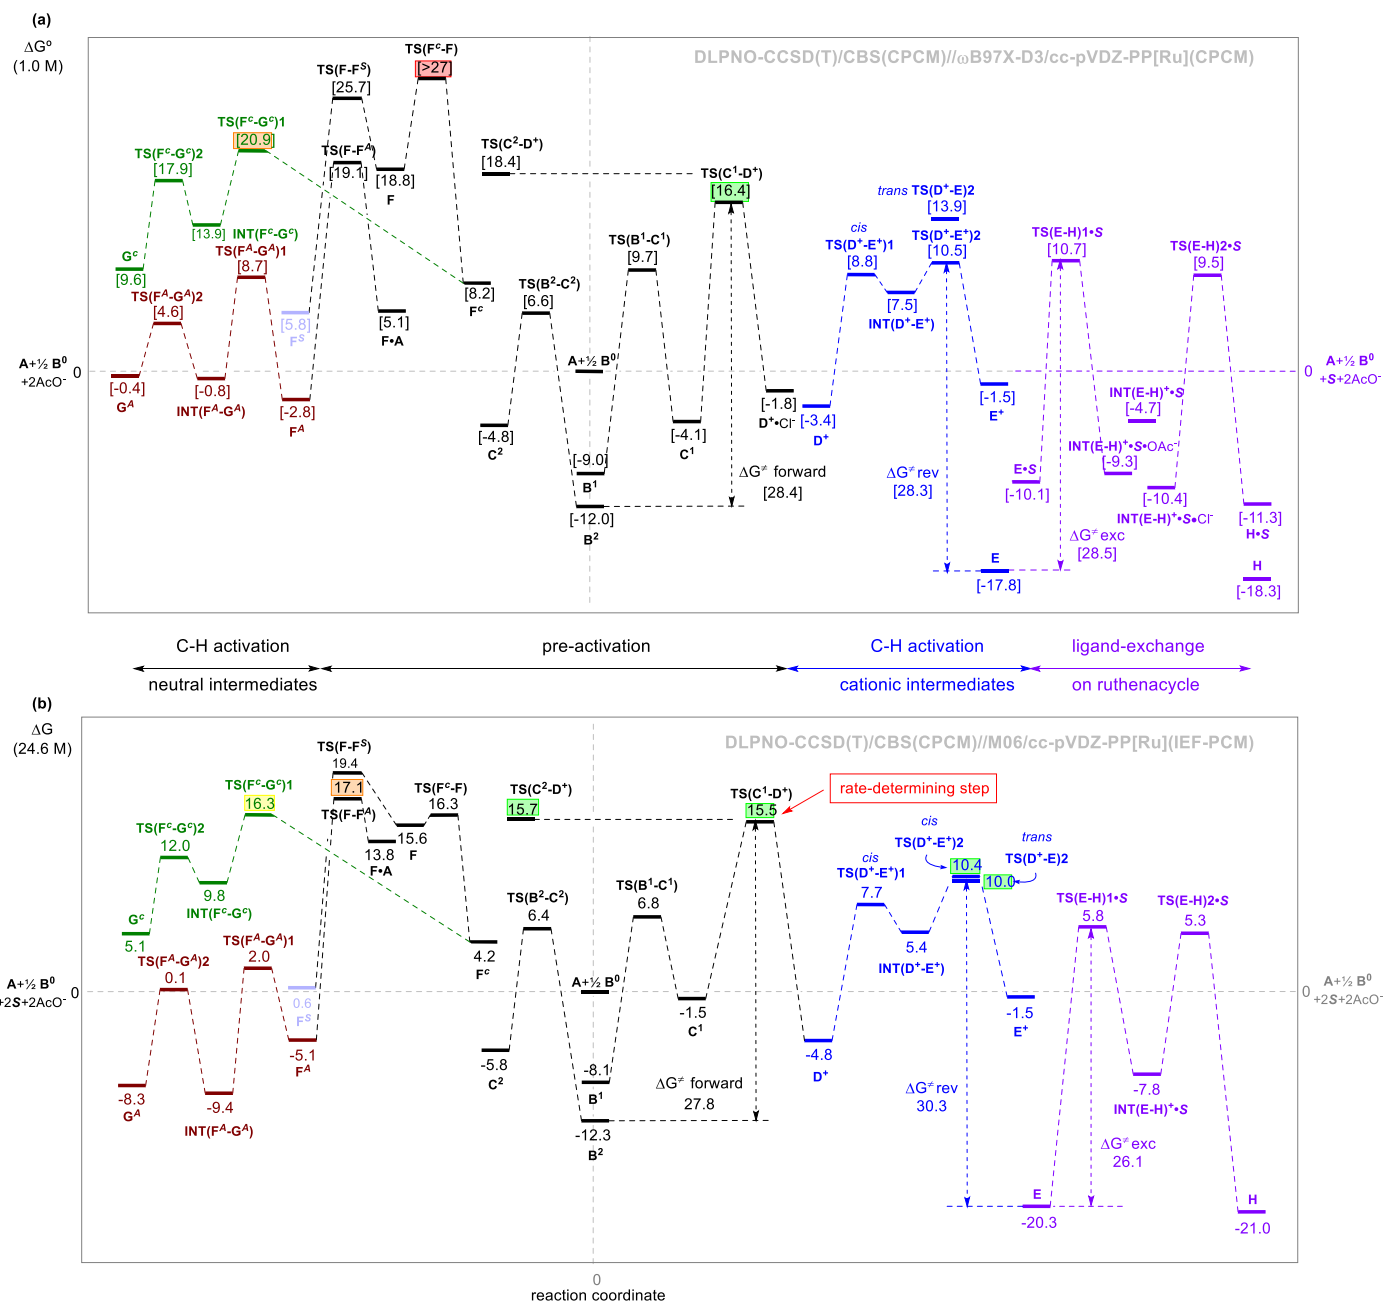



**Scheme S11.** Selected equilibria between solvent, chloride anion, acetate anion and acetic acid in methanol solution. Relative quasi-harmonic free energies (in kcal/mol) calculated at DLPNO-CCSD(T)/CBS(CPCM) level (298 K, 1 M) using the geometries optimized at M06/cc-pVDZ-PP[Ru](IEF-PCM) level in methanol are shown in blue color while those calculated by using the geometries optimized at  $\omega$ B97X-D3/cc-pVDZ-PP[Ru](CPCM) level are shown between brackets in red color. The corresponding values calculated at the same levels in condensed phase (298 K, c 24 M) are shown below in green color. Relative quasi-harmonic free energies (in kcal/mol) calculated at DLPNO-CCSD(T)/CBS(SMD) level are shown in italics.

S stands for solvent (MeOH). Hydrogen bonds are represented by dotted lines.

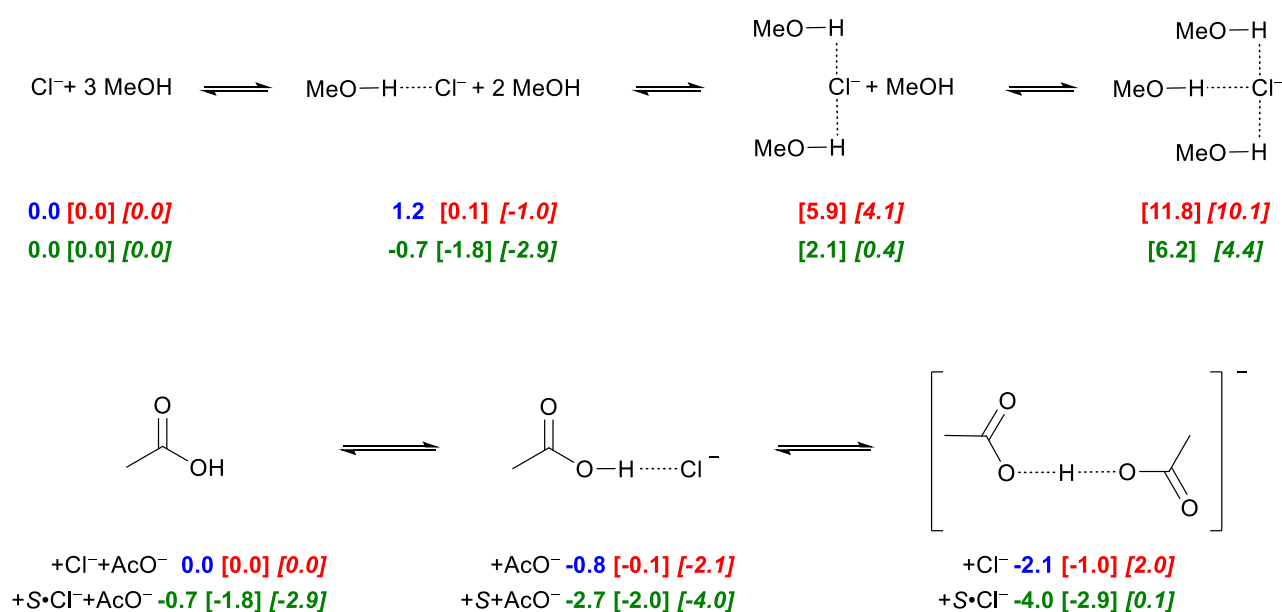

**Table S2.** Relative quasi-harmonic Gibbs energies ( $\Delta G$ ) and barriers heights ( $\Delta G^\ddagger$ ) calculated with DFT/aug-cc-pVTZ-PP[Ru](CPCM) levels for significant intermediates and TS structures as well as mean unsigned errors (MUEs) of the DFT methods relative to the benchmark energies calculated at DLPNO-CCSD(T)/CBS(CPCM) level (at 298 K and  $c = 1$  M). Values calculated on the geometries optimized with the M06 functional are reported first, followed by the corresponding values calculated by using the  $\omega$ B97X-D3 geometries, which are shown in brackets. All values are in kcal/mol.

| entry | structure                                                | benchmark                             | DFT method                            |                                       |                                       |                                       |                                       |                                       |                                       |                                       |
|-------|----------------------------------------------------------|---------------------------------------|---------------------------------------|---------------------------------------|---------------------------------------|---------------------------------------|---------------------------------------|---------------------------------------|---------------------------------------|---------------------------------------|
|       |                                                          |                                       | PBE0-D3(BJ)                           | M06-2X                                | $\omega$ B97M-V                       | B2G-PLYP                              | B2K-PLYP                              | PWPB95                                | PWPB95+D3(BJ)                         | PWPB95+D4                             |
| 1     | <b>B<sup>1</sup></b>                                     | -8.1 [-9.0]                           | -7.4 [-8.2]                           | -8.4 [-8.2]                           | -8.2 [-8.4]                           | -9.9 [-9.2]                           | -9.5 [-8.6]                           | -9.6 [-9.7]                           | -6.7 [-6.8]                           | -8.5 [-8.5]                           |
| 2     | <b>B<sup>2</sup></b>                                     | -12.3 [-12.0]                         | -9.7 [-9.8]                           | 1.9 [-10.8]                           | 1.3 [-11.2]                           | 0.0 [-10.7]                           | 0.5 [-10.3]                           | 0.0 [-10.9]                           | 3.0 [-8.6]                            | 1.0 [-10.6]                           |
| 3     | <b>E</b>                                                 | -18.6 [-17.8]                         | -15.1 [-14.9]                         | -2.8 [-6.9]                           | -9.3 [-13.0]                          | -8.2 [-13.0]                          | -9.4 [-14.2]                          | -5.7 [-9.7]                           | -9.0 [-13.0]                          | -10.0 [-13.9]                         |
| 4     | <b>H</b>                                                 | -19.3 [-18.3]                         | -17.5 [-15.8]                         | -6.9 [-7.4]                           | -11.2 [-12.5]                         | -12.7 [-13.5]                         | -13.2 [-14.7]                         | -9.2 [-9.9]                           | -12.2 [-13.0]                         | -13.0 [-13.7]                         |
| 5     | $\Delta G$ MUE                                           | 0.0 [0.0]                             | 2.2 [2.2]                             | 10.7 [6.0]                            | 7.8 [3.0]                             | 7.8 [2.8]                             | 7.4 [2.3]                             | 9.3 [4.6]                             | 8.4 [3.9]                             | 7.2 [2.6]                             |
| 6     | <b>TS(C<sup>1</sup>-D<sup>+</sup>)</b>                   | 29.0 <sup>b</sup> [28.4] <sup>b</sup> | 30.3 <sup>b</sup> [30.2] <sup>b</sup> | 31.7 <sup>a</sup> [29.3] <sup>b</sup> | 30.5 <sup>a</sup> [29.6] <sup>b</sup> | 38.5 <sup>a</sup> [33.7] <sup>b</sup> | 38.8 <sup>a</sup> [32.4] <sup>b</sup> | 38.1 <sup>a</sup> [35.4] <sup>b</sup> | 31.1 <sup>a</sup> [28.8] <sup>b</sup> | 32.4 <sup>a</sup> [30.4] <sup>b</sup> |
| 7     | <b>TS(F<sup>c</sup>-F)</b>                               | 30.6 <sup>b</sup> [32.9] <sup>b</sup> | 27.4 <sup>b</sup> [35.0] <sup>b</sup> | 25.5 <sup>a</sup> [27.4] <sup>b</sup> | 26.1 <sup>a</sup> [31.3] <sup>b</sup> | 48.0 <sup>a</sup> [43.8] <sup>b</sup> | 50.4 <sup>a</sup> [44.8] <sup>b</sup> | 43.2 <sup>a</sup> [43.1] <sup>b</sup> | 37.0 <sup>a</sup> [40.1] <sup>b</sup> | 36.1 <sup>a</sup> [39.1] <sup>b</sup> |
| 8     | <b>TS(F<sup>c</sup>-F<sup>b</sup>)</b>                   | 33.6 <sup>b</sup> [37.7] <sup>b</sup> | 30.2 <sup>b</sup> [33.7] <sup>b</sup> | 23.8 <sup>a</sup> [21.2] <sup>b</sup> | 30.2 <sup>a</sup> [29.0] <sup>b</sup> | 42.0 <sup>a</sup> [42.0] <sup>b</sup> | 43.1 <sup>a</sup> [43.0] <sup>b</sup> | 41.7 <sup>a</sup> [40.9] <sup>b</sup> | 39.6 <sup>a</sup> [37.9] <sup>b</sup> | 37.5 <sup>a</sup> [37.4] <sup>b</sup> |
| 9     | <b>TS(F<sup>c</sup>-F<sup>a</sup>)</b>                   | 32.4 <sup>b</sup> [34.9] <sup>b</sup> | 29.9 <sup>b</sup> [32.8] <sup>b</sup> | 34.3 <sup>a</sup> [25.2] <sup>b</sup> | 34.5 <sup>a</sup> [28.2] <sup>b</sup> | 57.2 <sup>a</sup> [44.2] <sup>b</sup> | 59.3 <sup>a</sup> [44.4] <sup>b</sup> | 51.5 <sup>a</sup> [43.3] <sup>b</sup> | 44.1 <sup>a</sup> [36.6] <sup>b</sup> | 43.5 <sup>a</sup> [36.1] <sup>b</sup> |
| 10    | <b>TS(D<sup>+</sup>-E<sup>+</sup>)1</b>                  | 20.1 <sup>b</sup> [20.8] <sup>b</sup> | 20.9 <sup>b</sup> [21.5] <sup>b</sup> | 26.1 <sup>a</sup> [24.5] <sup>b</sup> | 21.3 <sup>a</sup> [22.3] <sup>b</sup> | 28.3 <sup>a</sup> [24.1] <sup>b</sup> | 28.4 <sup>a</sup> [23.3] <sup>b</sup> | 28.0 <sup>a</sup> [25.7] <sup>b</sup> | 22.1 <sup>a</sup> [20.6] <sup>b</sup> | 23.8 <sup>a</sup> [22.4] <sup>b</sup> |
| 11    | <b>TS(D<sup>+</sup>-E<sup>+</sup>)2</b>                  | 22.8 <sup>b</sup> [22.5] <sup>b</sup> | 20.5 <sup>b</sup> [19.7] <sup>b</sup> | 32.2 <sup>a</sup> [32.5] <sup>b</sup> | 24.1 <sup>a</sup> [24.8] <sup>b</sup> | 26.6 <sup>a</sup> [24.3] <sup>b</sup> | 26.0 <sup>a</sup> [23.4] <sup>b</sup> | 28.7 <sup>a</sup> [27.7] <sup>b</sup> | 22.2 <sup>a</sup> [22.3] <sup>b</sup> | 24.2 <sup>a</sup> [24.1] <sup>b</sup> |
| 12    | <b>TS(F<sup>c</sup>-G<sup>+</sup>)1</b>                  | 30.6 <sup>b</sup> [32.9] <sup>b</sup> | 29.1 <sup>b</sup> [30.2] <sup>b</sup> | 20.7 <sup>a</sup> [24.4] <sup>b</sup> | 27.4 <sup>a</sup> [26.4] <sup>b</sup> | 49.9 <sup>a</sup> [41.5] <sup>b</sup> | 45.1 <sup>a</sup> [41.2] <sup>b</sup> | 37.4 <sup>b</sup> [41.2] <sup>b</sup> | 37.4 <sup>a</sup> [33.4] <sup>b</sup> | 36.5 <sup>a</sup> [33.1] <sup>b</sup> |
| 13    | <b>TS(F<sup>c</sup>-G<sup>+</sup>)2</b>                  | 26.2 <sup>b</sup> [29.9] <sup>b</sup> | 22.7 <sup>b</sup> [25.9] <sup>b</sup> | 33.4 <sup>a</sup> [26.5] <sup>b</sup> | 27.3 <sup>a</sup> [27.8] <sup>b</sup> | 43.9 <sup>a</sup> [39.0] <sup>b</sup> | 45.4 <sup>a</sup> [38.6] <sup>b</sup> | 41.4 <sup>a</sup> [39.4] <sup>b</sup> | 32.0 <sup>a</sup> [30.9] <sup>b</sup> | 32.0 <sup>a</sup> [30.3] <sup>b</sup> |
| 14    | <b>TS(F<sup>a</sup>-G<sup>+</sup>)1</b>                  | 16.3 <sup>b</sup> [20.7] <sup>b</sup> | 15.2 <sup>b</sup> [17.6] <sup>b</sup> | 27.4 <sup>a</sup> [13.6] <sup>b</sup> | 22.0 <sup>a</sup> [15.7] <sup>b</sup> | 46.8 <sup>a</sup> [31.2] <sup>b</sup> | 49.6 <sup>a</sup> [30.8] <sup>b</sup> | 42.1 <sup>a</sup> [32.7] <sup>b</sup> | 32.6 <sup>a</sup> [22.4] <sup>b</sup> | 31.9 <sup>a</sup> [23.6] <sup>b</sup> |
| 15    | <b>TS(F<sup>a</sup>-G<sup>+</sup>)2</b>                  | 14.3 <sup>b</sup> [16.6] <sup>b</sup> | 10.3 <sup>b</sup> [14.6] <sup>b</sup> | 15.1 <sup>a</sup> [17.9] <sup>b</sup> | 17.2 <sup>a</sup> [16.3] <sup>b</sup> | 23.1 <sup>a</sup> [27.6] <sup>b</sup> | 21.6 <sup>a</sup> [27.2] <sup>b</sup> | 28.1 <sup>a</sup> [30.1] <sup>b</sup> | 18.6 <sup>a</sup> [21.0] <sup>b</sup> | 18.4 <sup>a</sup> [21.1] <sup>b</sup> |
| 16    | <b>TS(F<sup>b</sup>-G<sup>+</sup>)1</b>                  | 26.8 <sup>b</sup> [30.2] <sup>b</sup> | 24.1 <sup>b</sup> [25.6] <sup>b</sup> | 16.2 <sup>a</sup> [14.5] <sup>b</sup> | 23.1 <sup>a</sup> [22.4] <sup>b</sup> | 34.5 <sup>a</sup> [33.7] <sup>b</sup> | 35.2 <sup>a</sup> [34.5] <sup>b</sup> | 36.2 <sup>a</sup> [34.2] <sup>b</sup> | 33.0 <sup>a</sup> [31.0] <sup>b</sup> | 31.2 <sup>a</sup> [30.6] <sup>b</sup> |
| 17    | <b>TS(F<sup>b</sup>-G<sup>+</sup>)2</b>                  | 20.4 <sup>b</sup> [23.1] <sup>b</sup> | 16.1 <sup>b</sup> [18.5] <sup>b</sup> | 19.2 <sup>a</sup> [17.6] <sup>b</sup> | 23.1 <sup>a</sup> [21.2] <sup>b</sup> | 27.6 <sup>a</sup> [26.8] <sup>b</sup> | 28.3 <sup>a</sup> [27.6] <sup>b</sup> | 30.5 <sup>a</sup> [28.9] <sup>b</sup> | 27.2 <sup>a</sup> [26.2] <sup>b</sup> | 25.7 <sup>a</sup> [25.1] <sup>b</sup> |
| 18    | <b>TS(E-H)1</b>                                          | 27.9 <sup>c</sup> [28.5] <sup>c</sup> | 28.2 <sup>c</sup> [28.3] <sup>c</sup> | 31.4 <sup>a</sup> [28.9] <sup>b</sup> | 29.2 <sup>c</sup> [28.2] <sup>c</sup> | 34.0 <sup>a</sup> [32.0] <sup>c</sup> | 32.7 <sup>a</sup> [31.8] <sup>c</sup> | 36.5 <sup>a</sup> [32.7] <sup>b</sup> | 29.6 <sup>c</sup> [29.2] <sup>c</sup> | 29.4 <sup>a</sup> [29.0] <sup>c</sup> |
| 19    | <b>TS(E-H)2</b>                                          | 27.4 <sup>c</sup> [27.3] <sup>c</sup> | 25.7 <sup>c</sup> [26.5] <sup>c</sup> | 26.7 <sup>a</sup> [26.0] <sup>b</sup> | 26.3 <sup>c</sup> [27.3] <sup>c</sup> | 31.7 <sup>a</sup> [30.0] <sup>c</sup> | 30.8 <sup>a</sup> [30.1] <sup>c</sup> | 30.8 <sup>a</sup> [9.6] <sup>b</sup>  | 26.3 <sup>a</sup> [27.3] <sup>b</sup> | 26.3 <sup>a</sup> [27.5] <sup>c</sup> |
| 20    | $\Delta G^\ddagger$ MUE                                  | 0.0 [0.0]                             | 2.3 [2.7]                             | 5.7 [6.8]                             | 2.6 [3.7]                             | 12.4 [5.8]                            | 12.6 [5.8]                            | 11.1 [6.6]                            | 5.6 [1.2]                             | 5.2 [1.3]                             |
| 21    | $\Delta G^\ddagger$ MUE <sub>cationic</sub> <sup>d</sup> | 0.0 [0.0]                             | 1.5 [1.3]                             | 4.6 [3.3]                             | 1.3 [1.1]                             | 6.4 [3.3]                             | 5.9 [2.7]                             | 6.5 [4.7]                             | 1.5 [0.3]                             | 2.2 [1.2]                             |

<sup>a</sup> relative to **B<sup>1</sup>**, <sup>b</sup> relative to **B<sup>2</sup>**, <sup>c</sup> relative to **E**. <sup>d</sup> Considering barrier heights to **TS(C<sup>1</sup>-D<sup>+</sup>)**, **TS(D<sup>+</sup>-E<sup>+</sup>)1**, **TS(D<sup>+</sup>-E<sup>+</sup>)2**, **TS(E-H)<sup>+</sup>1** and **TS(E-H)<sup>+</sup>2**.

**Performance of hybrid DFT methods.** Single point energy evaluations with the selected DFT methods using an augmented polarized triple- $\zeta$  basis set did not allow to reproduce the DLPNO-CCSD(T)/CBS(CPCM) energy results. Calculations with either PBE0-D3(BJ),<sup>5</sup> M06-2X<sup>22</sup> or  $\omega$ B97M-V<sup>21</sup> functionals indicate that reaction pathways involving neutral diacetate intermediates should be kinetically favoured over [or competitive with] those involving the cationic ones. In particular, according to the energy evaluations with the M06-2X functional, the lowest energy barriers for the C-H activation event were located in the pathway involving neutral and solvated intermediates (see entries 16 and 17), the final ligand exchange at ruthenacycle would be the RDS (see entry 18) and the transformation of the monomeric ruthenium precursors to the cycloruthenates should be endergonic (see entries 1-4). Energy evaluations with either  $\omega$ B97M-V or PBE0-D3(BJ) functionals indicate that the pathway involving neutral diacetate intermediates with the *p*-cymene moiety acting as an  $\eta^2$ -ligand should be kinetically favoured or competitive with the pathway involving the cationic intermediates (compare entry 6 with entries 12 and 13). Calculations with  $\omega$ B97M-V functional incorrectly predict the final ligand exchange process at ruthenacycles as the RDS (see entry 18) but provide the best agreement with the benchmark results among the hybrid DFT methods for the activation barriers involving cationic intermediates ( $\Delta G^\ddagger$  MUE<sub>cationic</sub> of ca. 1 kcal/mol, see entry 21). Conversely, energy evaluations with PBE0-D3(BJ) correctly indicate that the ligand exchange processes on the ruthenacycles are faster than the C-H activation events on the neutral intermediates (compare entries 12 and 18). Thus, calculations with the PBE0-D3(BJ) functional does not afford the correct energy gap between the pathways involving cationic and neutral intermediates but show the lowest MUEs among the tested hybrid DFT methods for the thermodynamics of the global process ( $\Delta G$  MUEs of ca. 2 kcal/mol, see entry 5) as well as for the whole set of activation barriers ( $\Delta G^\ddagger$  MUEs below 3 kcal/mol, see entry 20).

**Figure S3.** Relative quasi-harmonic Gibbs energy plots calculated at DLPNO-CCSD(T)/CBS(SMD) level in methanol after geometry optimizations at  $\omega$ B97X-D3/cc-pVDZ-PP[Ru](CPCM) level (in kcal/mol). (a) At 298 K and 1 M. (b) At 298 K and 24 M, including one or two explicit MeOH molecules to monosolvate the chloride anions. Pre-activation by anion dissociation and ligand exchange processes at ruthenium are shown in black color, C-H activations involving cationic intermediates are shown towards the right in blue color and the corresponding processes involving neutral intermediates are shown towards the left in brown and green colors.

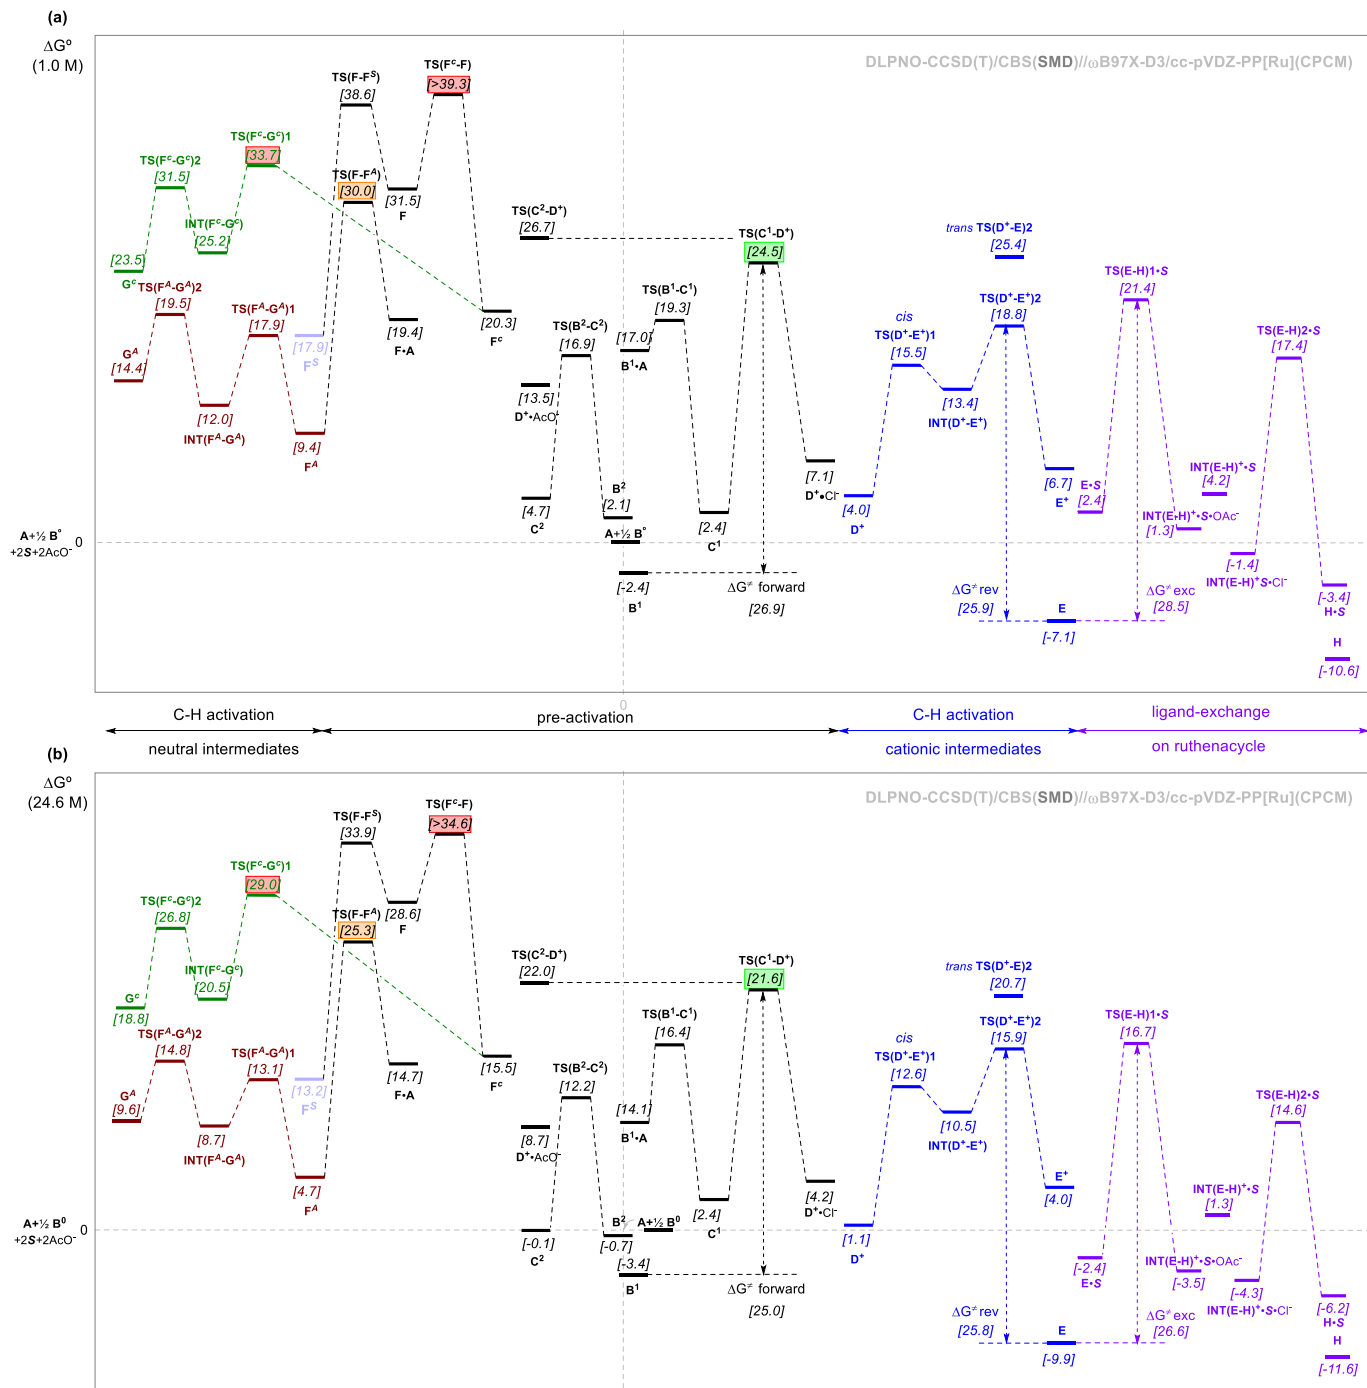

**Scheme S12.** Equilibria between  $B^1 \cdot S_n$  precursors in methanol solution. Relative quasi-harmonic free energies (in kcal/mol) calculated at DLPNO-CCSD(T)/CBS(SMD) level (298 K, 1 M) using the geometries optimized at wB97X-D3/cc-pVDZ-PP[Ru](CPCM) level in methanol are shown in brackets, italics and red colour. *S* stands for solvent (MeOH). Hydrogen bonds are represented by dotted lines.

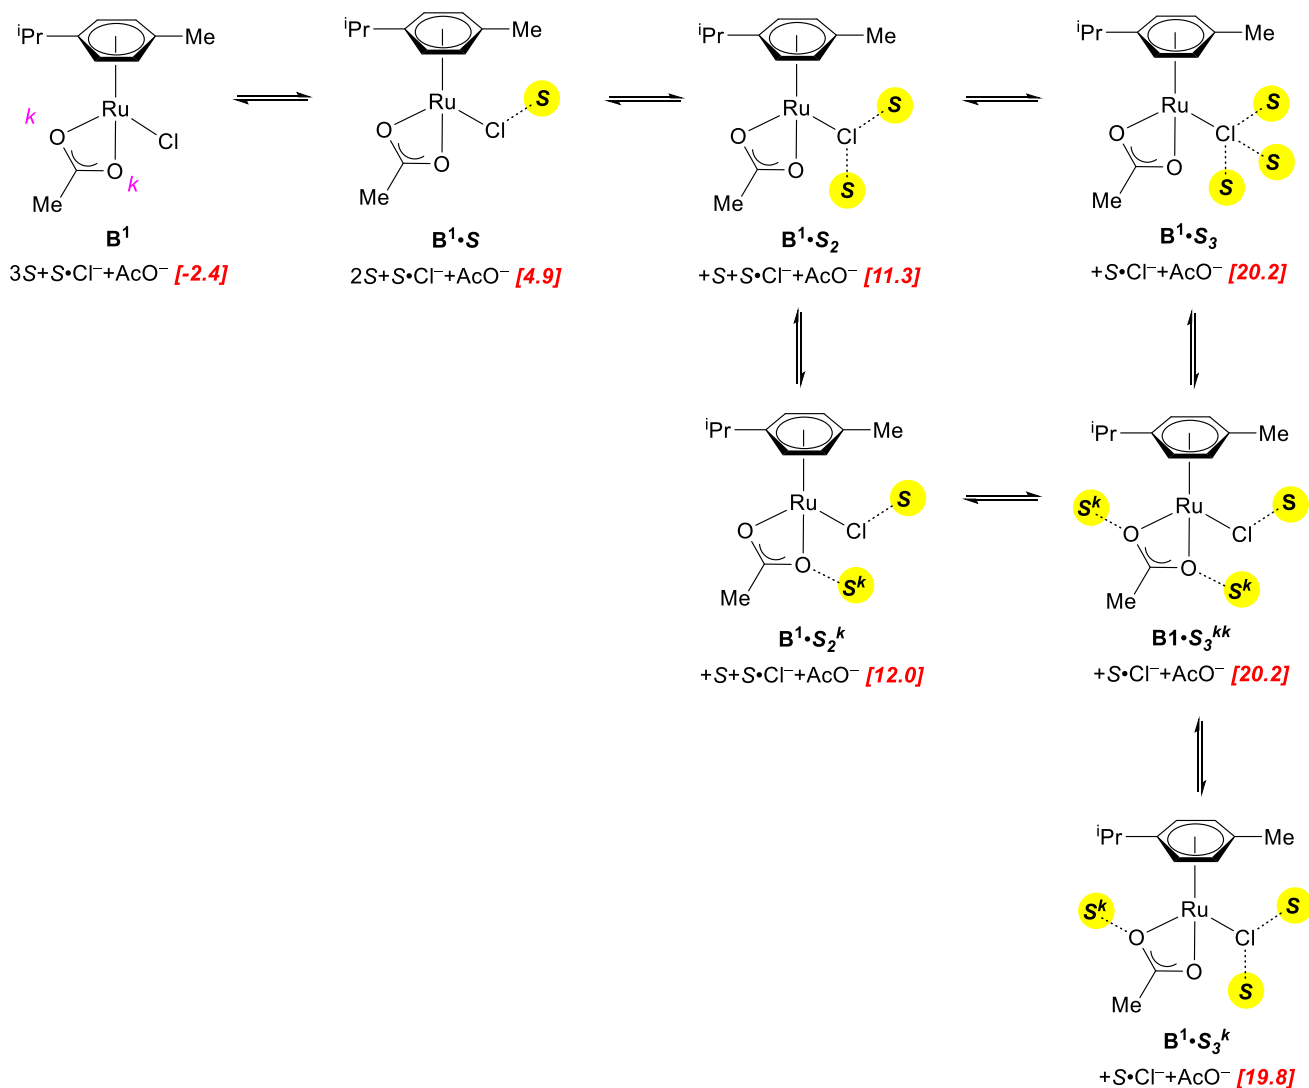

**Scheme S13a.** Formation of key cationic ruthenium intermediate  $D^+$  via transition state structure  $TS(C^1-D^+) \cdot S$ . (A) Relative quasi-harmonic free energies (in kcal/mol) calculated at DLPNO-CCSD(T)/CBS(SMD) level (298 K, 1 M) on the geometries optimized at  $\omega$ B97X-D3/cc-pVDZ-PP[Ru](IEF-PCM) level in methanol are shown in red color.  $S$  stands for solvent (MeOH). (B) 3D CYLview representations for the IRC path calculated at  $\omega$ B97X-D3/cc-pVDZ-PP[Ru](IEF-PCM) level in methanol from  $TS(C^1-D^+) \cdot S$ , showing relevant distances in Ångstroms.

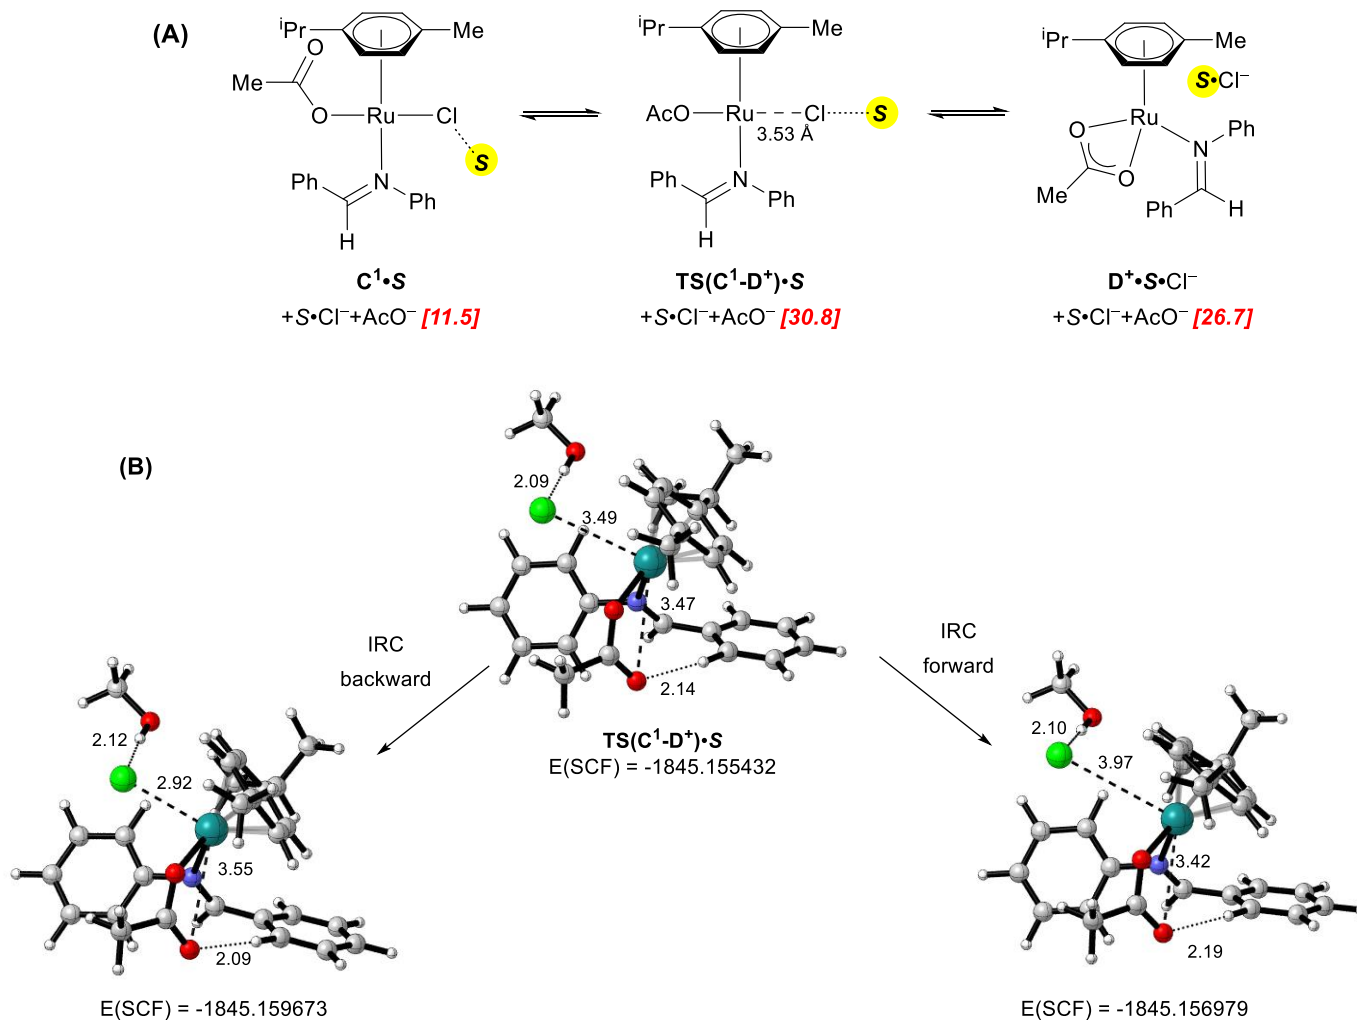

**Scheme S13b.** Formation of key cationic ruthenium intermediate  $D^+$  via transition state structure  $TS(C^1-D^+) \cdot S_2$ .

(A) Relative quasi-harmonic free energies (in kcal/mol) calculated at DLPNO-CCSD(T)/CBS(SMD) level (298 K, 1 M) on the geometries optimized at  $\omega$ B97X-D3/cc-pVDZ-PP[Ru](IEF-PCM) level in methanol are shown in red color. S stands for solvent (MeOH). (B) 3D CYLview representations for the IRC path calculated at  $\omega$ B97X-D3/cc-pVDZ-PP[Ru](IEF-PCM) level in methanol from  $TS(C^1-D^+) \cdot S_2$ , showing relevant distances in Ångstroms.

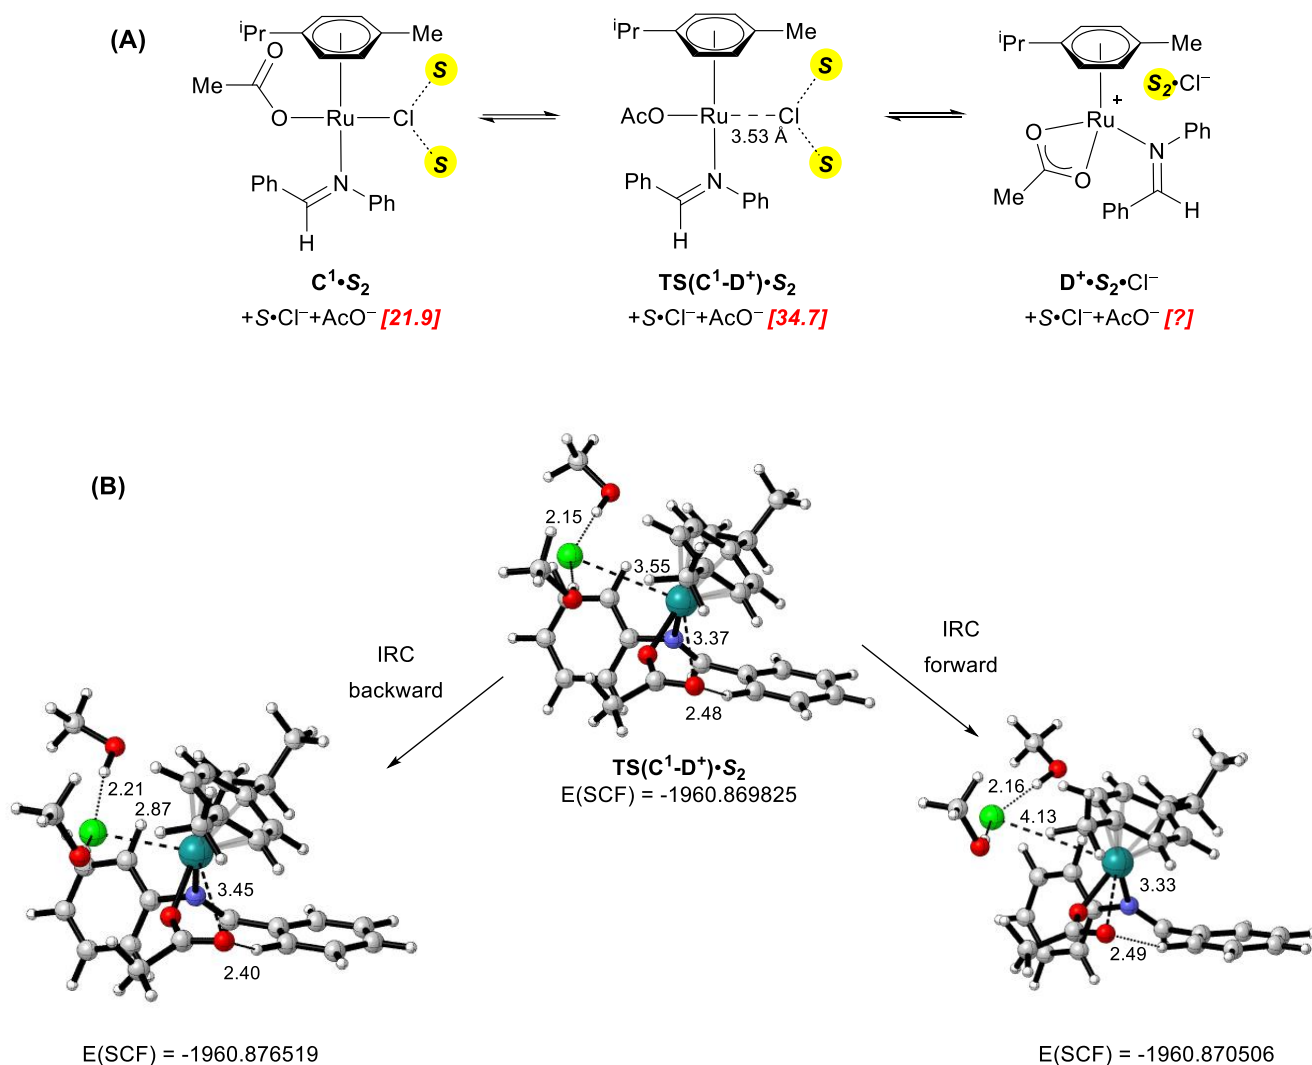

**Scheme S13c.** Formation of key cationic ruthenium intermediate  $D^+$  via transition state structure  $TS(C^1-D^+) \cdot S_3$ . (A) Relative quasi-harmonic free energies (in kcal/mol) calculated at DLPNO-CCSD(T)/CBS(SMD) level (298 K, 1 M) on the geometries optimized at  $\omega$ B97X-D3/cc-pVDZ-PP[Ru](IEF-PCM) level in methanol are shown in red color.  $S$  stands for solvent (MeOH). (B) 3D CYLview representations for the IRC paths calculated at  $\omega$ B97X-D3/cc-pVDZ-PP[Ru](IEF-PCM) level in methanol from  $TS(C^1-D^+) \cdot S_3$  and  $TS(C^1-D^+) \cdot S_3^p$ , showing relevant distances in Ångstroms.

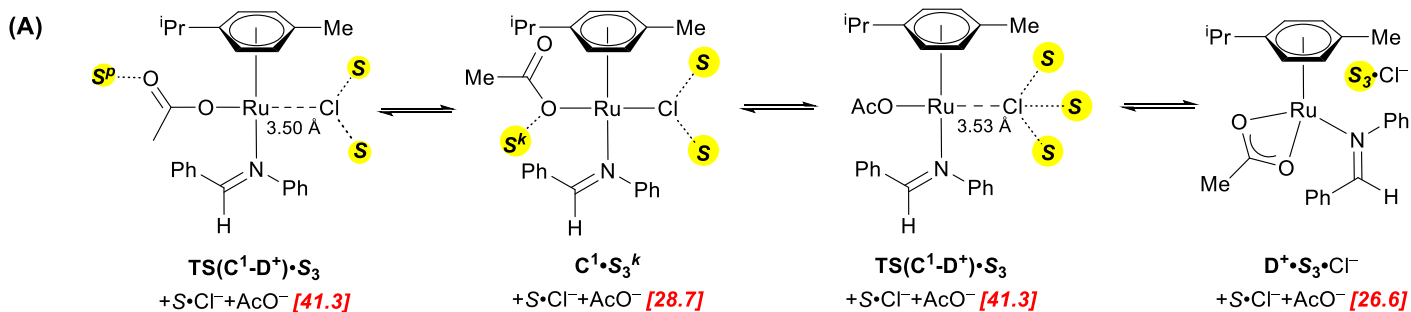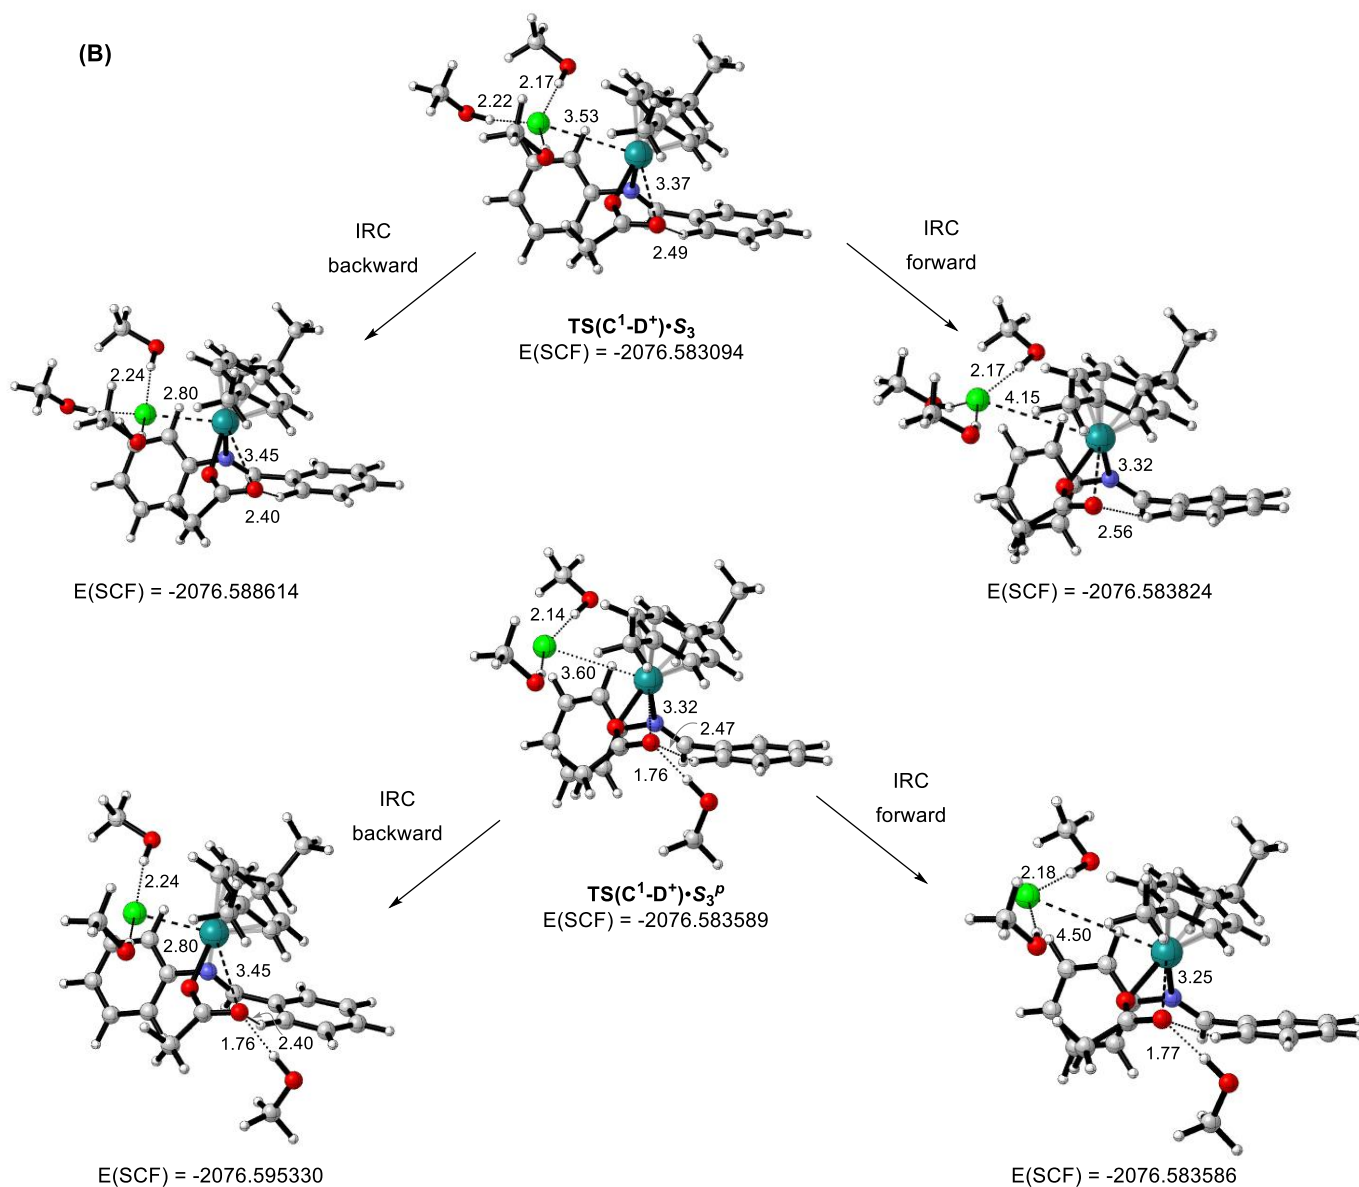

**Scheme S14.** Lowest energy non-solvated TS structures located for the C-H bond activation process from  $D^+$  to  $E^+$  in the  $S_1$ ,  $S_2$ - and  $S_3$ -reaction channels. (A) Relative quasi-harmonic free energies (in kcal/mol) calculated at DLPNO-CCSD(T)/CBS(SMD) level (298 K, 1 M) on the geometries optimized at  $\omega$ B97X-D3/cc-pVDZ-PP[Ru](IEF-PCM) level in methanol are shown in brackets and italics, in red color.  $S$  stands for solvent (MeOH). (B) 3D CYLview representations for the IRC paths calculated at  $\omega$ B97X-D3/cc-pVDZ-PP[Ru](IEF-PCM) level in methanol from *cis*-TS( $D^+$ - $E^+$ )1 and *cis*-TS( $D^+$ - $E^+$ )2, showing relevant distances in Ångstroms.

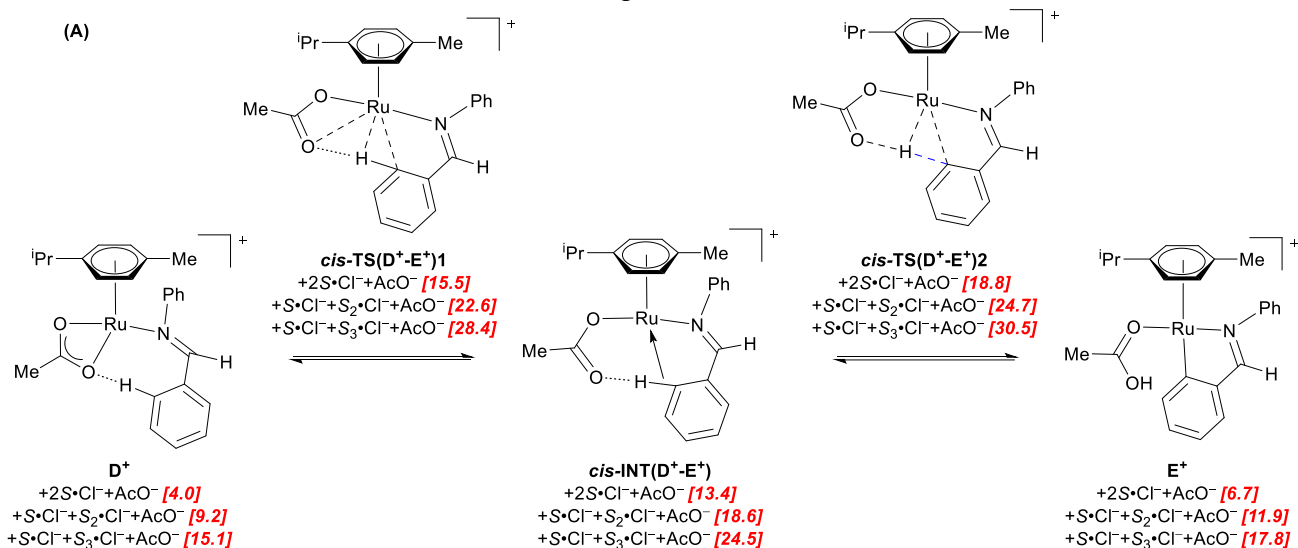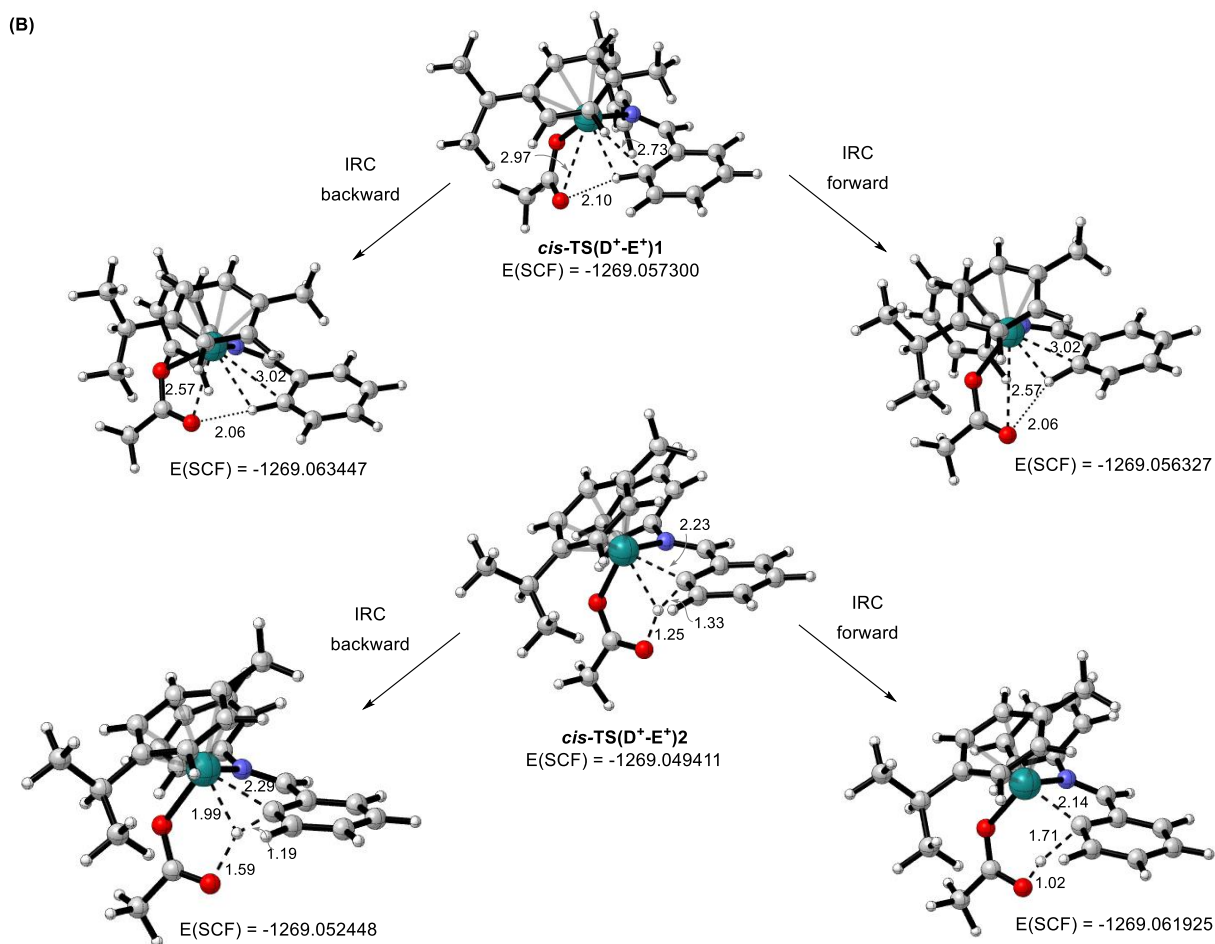



**Figure S4.** Energy plot for chloride dissociation from **C**<sup>1</sup> and subsequent C-H bond activation leading to cycloruthenate **E** in the *S*<sub>1</sub>-reaction channel, calculated at DLPNO-CCSD(T)/CBS(SMD) level in methanol (298 K, 1 M), after geometry optimizations at  $\omega$ B97X-D3/cc-pVDZ-PP[Ru](CPCM) level. Quasi-harmonic Gibbs energies are shown between brackets, in italics and red colour, relative to separated reagents (**A**+½**B**<sup>0</sup>+2AcO<sup>-</sup>) plus two explicit MeOH molecules: one active MeOH molecule (close to the reaction center in any intermediate or transition state, shadowed in yellow) and one stoichiometric MeOH molecule required to monosolvate the chloride anion freed in the formation of the **B**<sup>1</sup>•**S** precursor (bluish, omitted). Characteristic activation energies in the *S*<sub>1</sub>-reaction channel are shown in magenta color. The hydrogen bonds are represented by dotted lines.

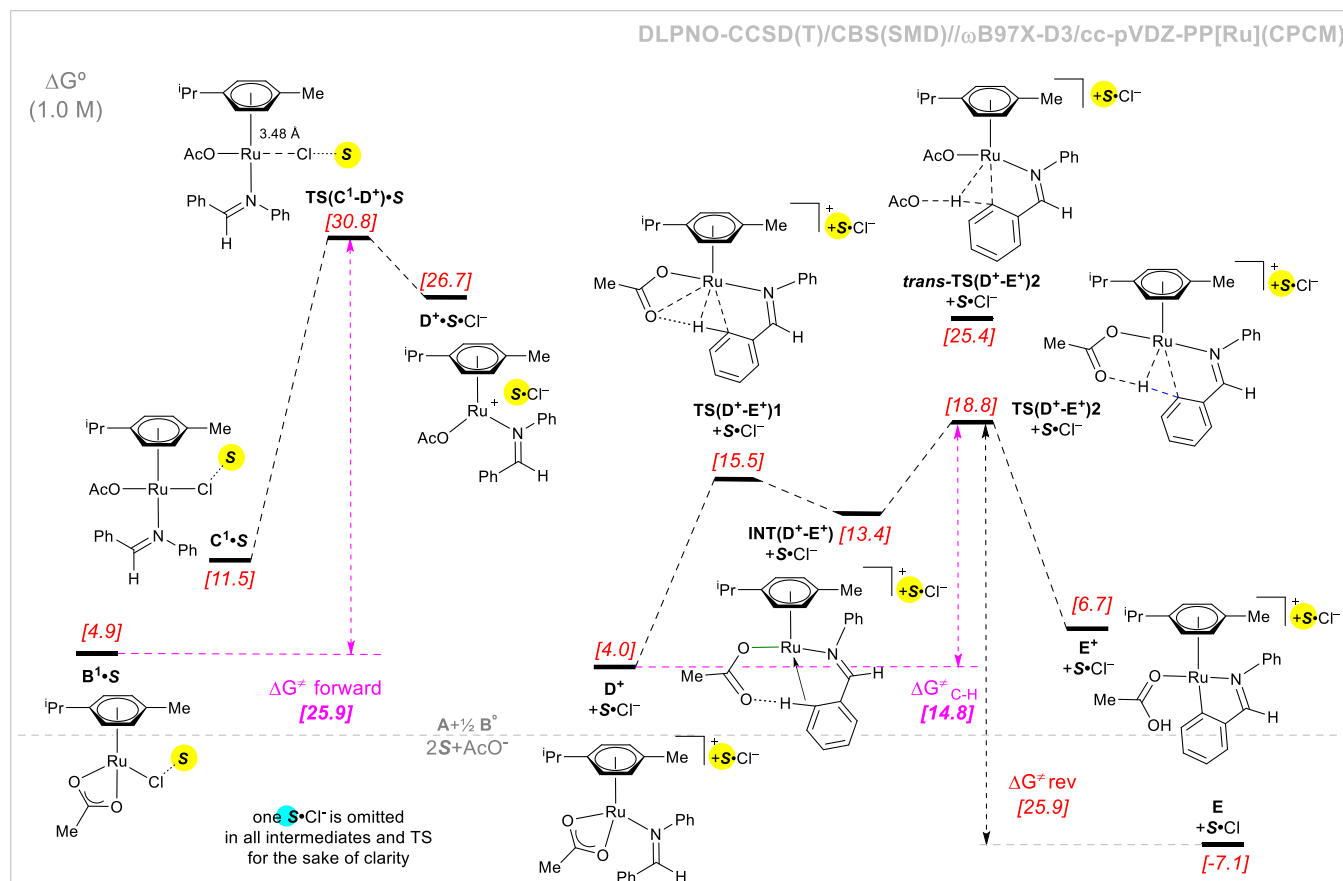

**Figure S5.** Energy plot for chloride dissociation from **C**<sup>1</sup> and subsequent C-H bond activation leading to cycloruthenate **E** in the *S*<sub>2</sub>-reaction channel, calculated at DLPNO-CCSD(T)/CBS(SMD) level in methanol (298 K, 1 M), after geometry optimizations at ωB97X-D3/cc-pVDZ-PP[Ru](CPCM) level. Quasi-harmonic Gibbs energies are shown between brackets, in italics and red colour, relative to separated reagents (**A**+½**B**<sup>0</sup>+2AcO<sup>-</sup>) plus three explicit MeOH molecules: two active MeOH molecule (close to the reaction center in any intermediate or transition state, shadowed in yellow) and one stoichiometric MeOH molecule required to monosolvate the chloride anion freed in the formation of the **B**<sup>1</sup>•**S** precursor (bluish, omitted). Characteristic activation energies in the *S*<sub>2</sub>-reaction channel are shown in green color. The hydrogen bonds are represented by dotted lines.

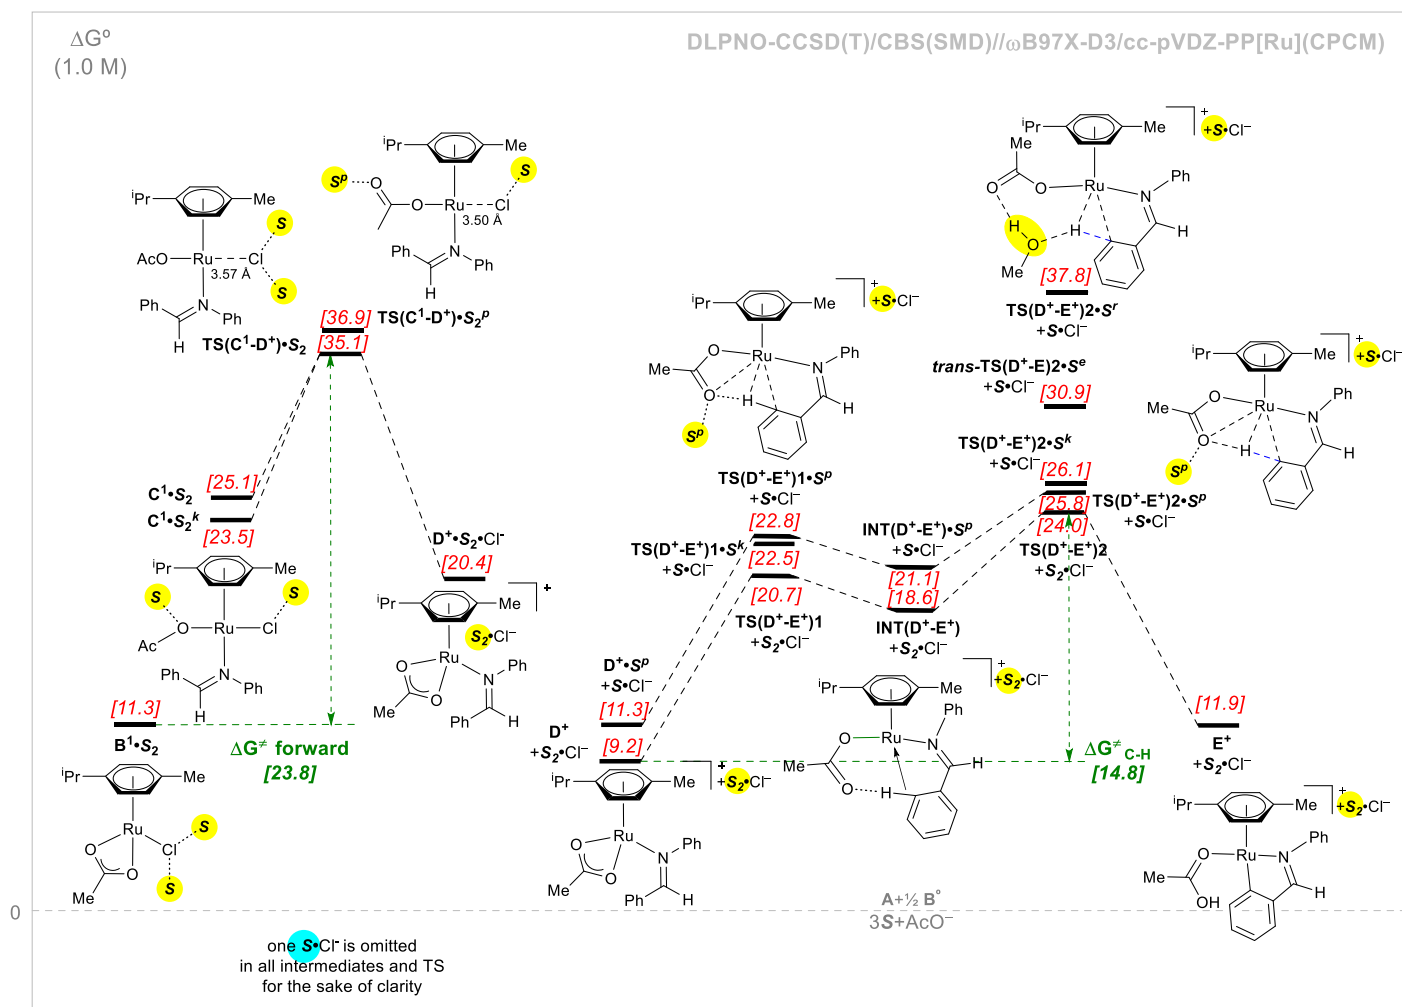

**Figure S6.** Energy plot for chloride dissociation from **C<sup>1</sup>** and subsequent C-H bond activation leading to cycloruthenate **E** in the  $S_3$ -reaction channel calculated at DLPNO-CCSD(T)/CBS(SMD) level in methanol (298 K, 1 M) after geometry optimizations at  $\omega$ B97X-D3/cc-pVDZ-PP[Ru](CPCM) level. Quasi-harmonic Gibbs energies are shown between brackets, in italics and red colour, relative to separated reagents ( $A + \frac{1}{2}B^0 + 2AcO^-$ ) plus four explicit MeOH molecules: three active MeOH molecule (close to the reaction center in any intermediate or transition state, shadowed in yellow) and one stoichiometric MeOH molecule required to monosolvate the chloride anion freed in the formation of the **B<sup>1</sup>•S** precursor (bluish, omitted). Characteristic activation energies in the  $S_3$ -reaction channel are shown in orange color. The hydrogen bonds are represented by dotted lines.

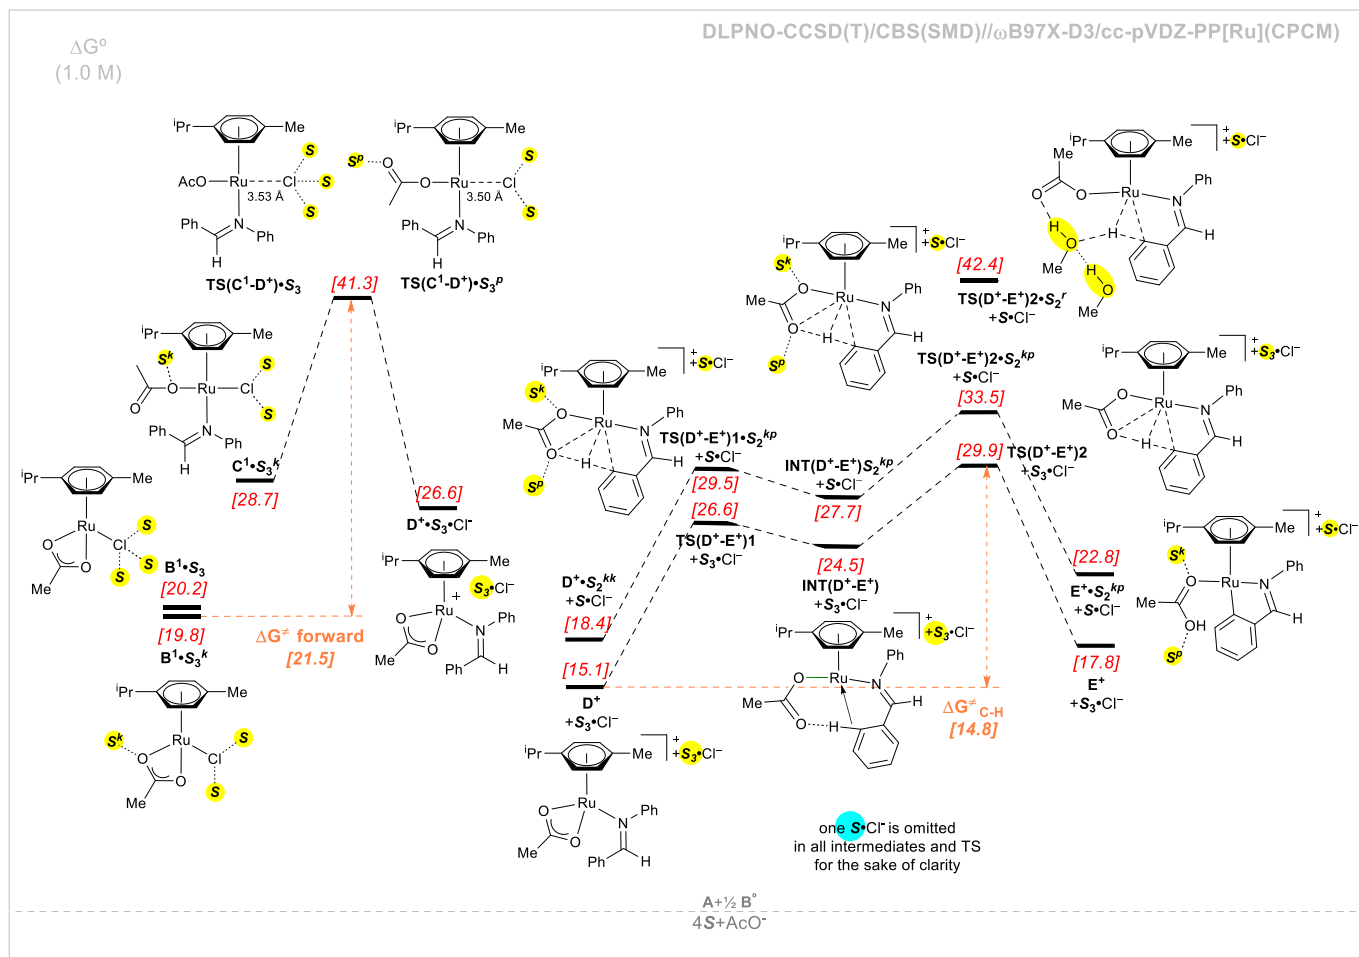

**Scheme S15a.** Lowest energy solvated TS structures located for the C-H bond activation process from  $D^+$  to  $E^+$  in the  $S_2$ -reaction channel. (A) Relative quasi-harmonic free energies (in kcal/mol) calculated at DLPNO-CCSD(T)/CBS(SMD) level (298 K, 1 M) on the geometries optimized at  $\omega$ B97X-D3/cc-pVDZ-PP[Ru](IEF-PCM) level in methanol are shown in brackets and italics, in red color.  $S$  stands for solvent (MeOH). (B) 3D CYLview representations for the IRC paths calculated at  $\omega$ B97X-D3/cc-pVDZ-PP[Ru](IEF-PCM) level in methanol from  $TS(D^+-E^+)1 \cdot S^P$  and  $TS(D^+-E^+)2 \cdot S^P$ , showing relevant distances in Ångstroms.

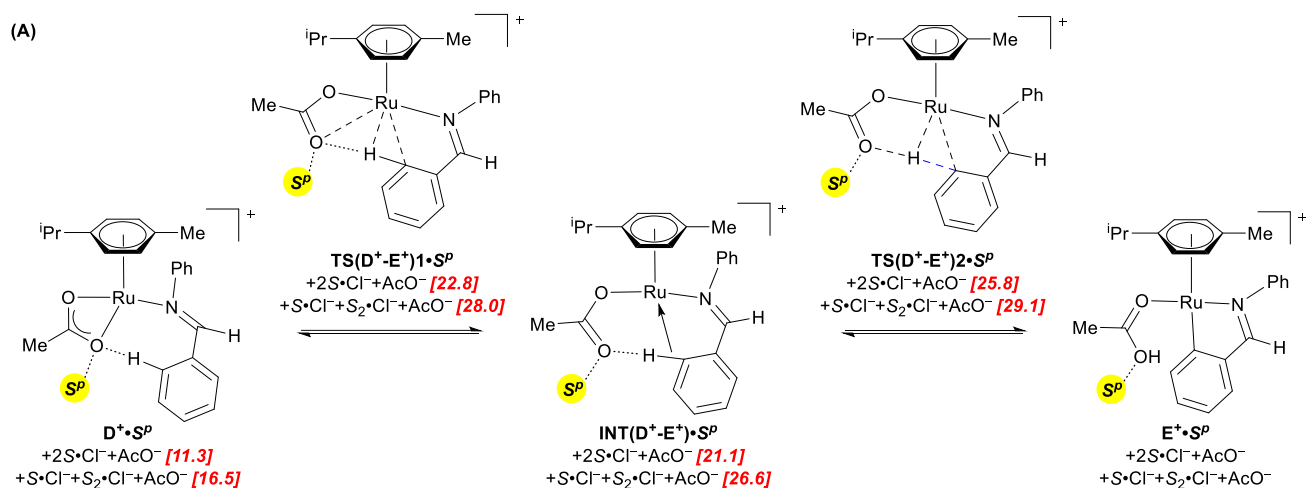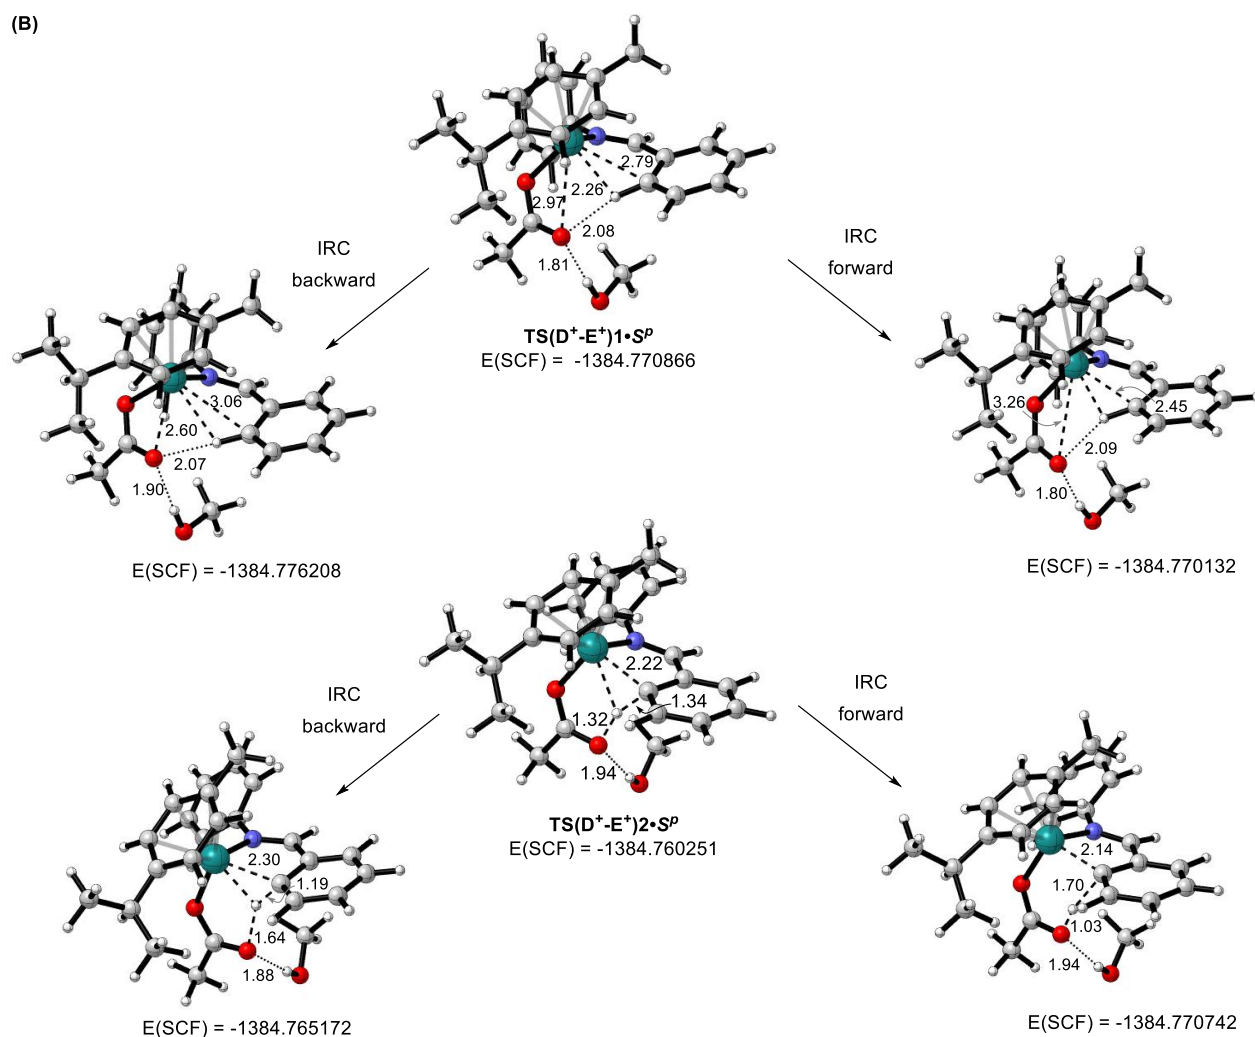

**Scheme S15b.** Lowest energy solvated TS structures located for the C-H bond activation process from  $D^+$  to  $E^+$  in the  $S_3$ -reaction channel. (A) Relative quasi-harmonic free energies (in kcal/mol) calculated at DLPNO-CCSD(T)/CBS(SMD) level (298 K, 1 M) on the geometries optimized at  $\omega$ B97X-D3/cc-pVDZ-PP[Ru](IEF-PCM) level in methanol are shown in brackets and italics, in red color.  $S$  stands for solvent (MeOH). (B) 3D CYLview representations for the IRC paths calculated at  $\omega$ B97X-D3/cc-pVDZ-PP[Ru](IEF-PCM) level in methanol from  $TS(D^+-E^+)1 \cdot S_2^{kp}$  and  $TS(D^+-E^+)2 \cdot S_2^{kp}$ , showing relevant distances in Ångstroms.

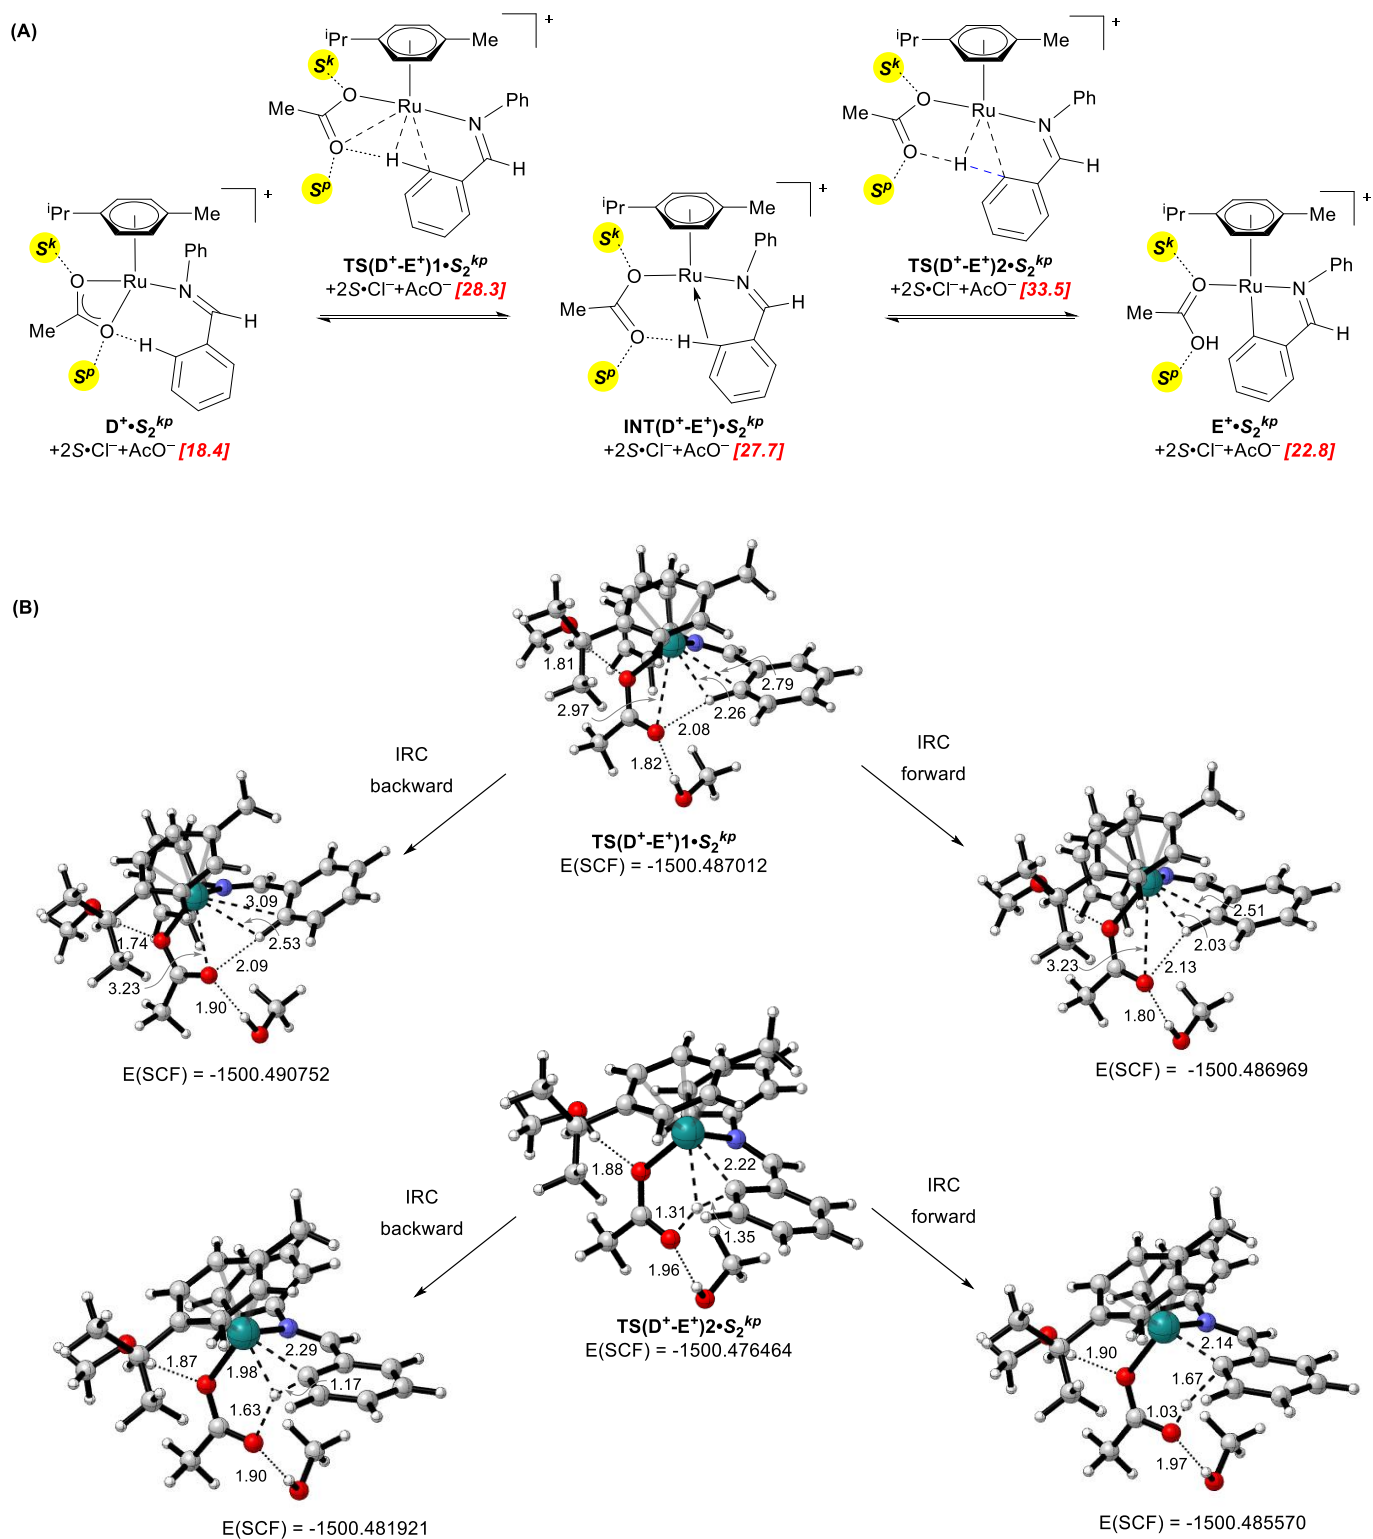

**Figure S7.** Alternative TS structures of higher energy located for the C-H bond activation process from  $D^+$  to  $E^+$  in the  $S_2$ - or  $S_3$ -reaction channel. Relative quasi-harmonic free energies (in kcal/mol) calculated at DLPNO-CCSD(T)/CBS(SMD) level (298 K, 1 M) on the geometries optimized at  $\omega$ B97X-D3/cc-pVDZ-PP[Ru](IEF-PCM) level in methanol are shown in brackets and italics, in red color. Activation barriers with respect to the corresponding lowest energy precursor  $D^+$  in the  $S_2$ - and  $S_3$ -reaction channels are shown in green and orange colour, respectively.  $S$  stands for solvent (MeOH). 3D CYLview representations show relevant distances in Ångstroms.

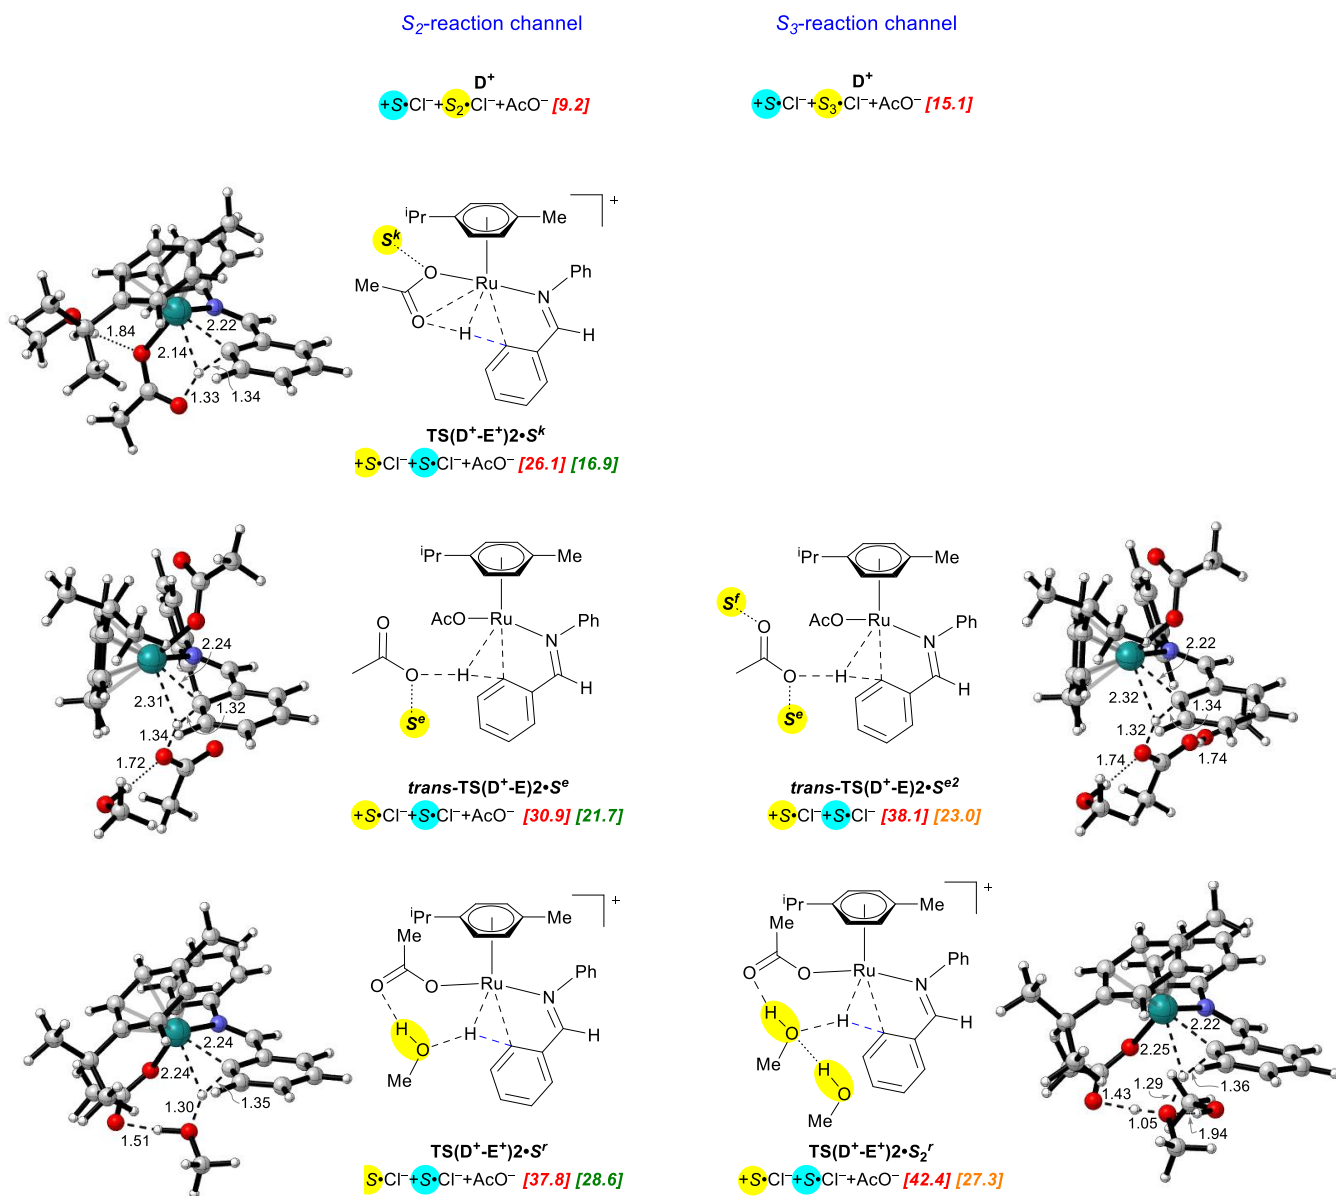

**Figure S8a.** Energy plot for the acetate/chloride exchange on cycloruthenates E and H in the  $S_1$ -reaction channel calculated at DLPNO-CCSD(T)/CBS(SMD) level in methanol (298 K, 1 M) after geometry optimizations at  $\omega$ B97X-D3/cc-pVDZ-PP[Ru](CPCM) level. Quasi-harmonic Gibbs energies are shown between brackets, in italics and red colour, relative to separated reagents ( $A+\frac{1}{2}B^0+2AcO^-$ ) plus three explicit MeOH molecules: two active MeOH molecule (close to the reaction center and shadowed in yellow) and one stoichiometric MeOH molecule required to monosolvate one chloride anion (bluish, omitted). Characteristic activation energies in the  $S_2$ -reaction channel are shown in magenta color. The hydrogen bonds are represented by dotted lines.

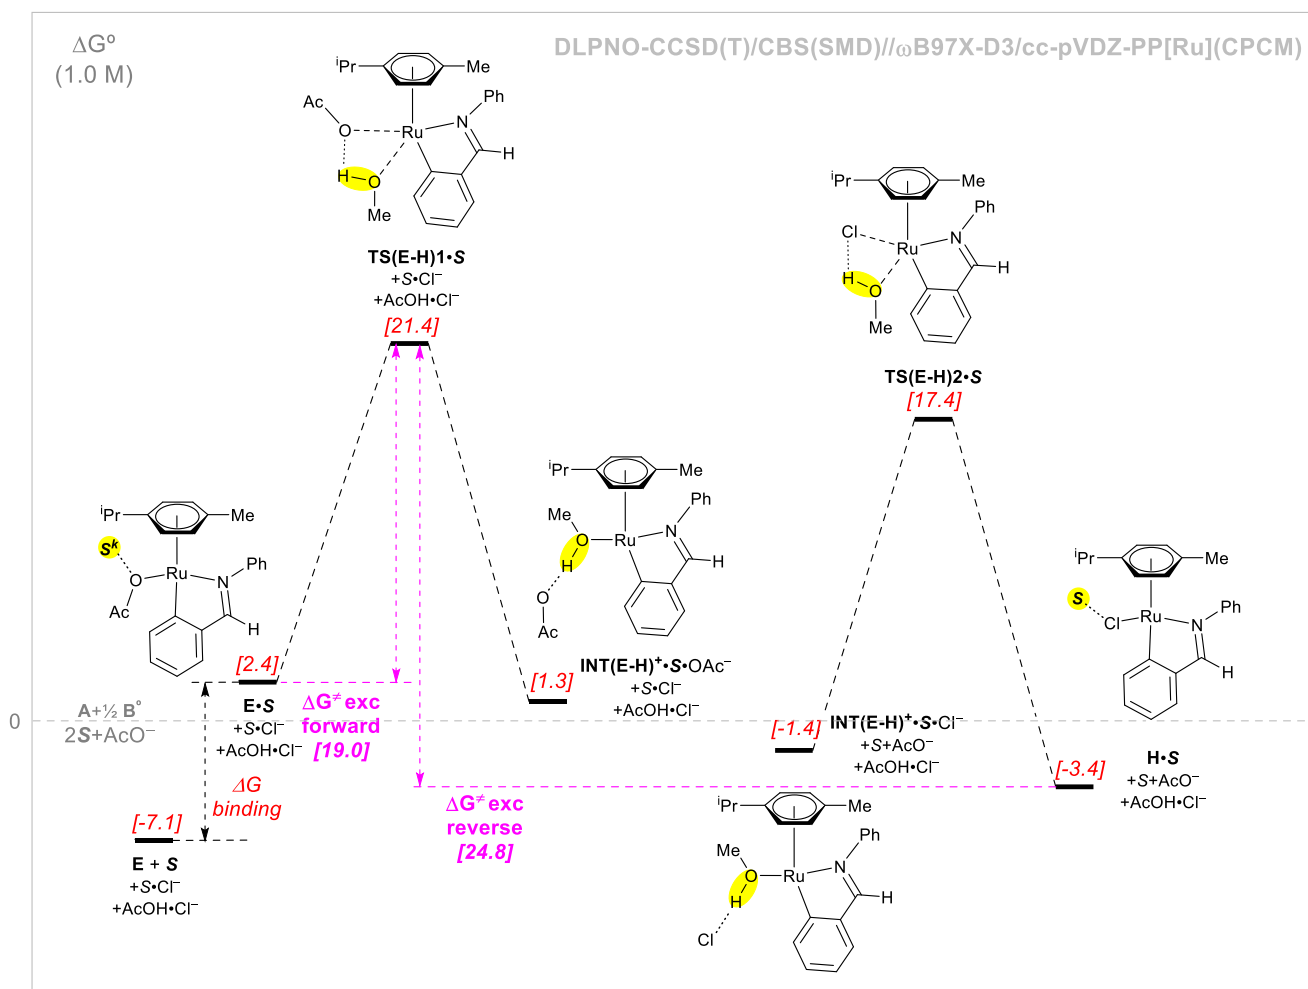

**Figure S8b.** Energy plot for the acetate/chloride exchange on cycloruthenates E and H in the  $S_2$ -reaction channel calculated at DLPNO-CCSD(T)/CBS(SMD) level in methanol (298 K, 1 M) after geometry optimizations at  $\omega$ B97X-D3/cc-pVDZ-PP[Ru](CPCM) level. Quasi-harmonic Gibbs energies are shown between brackets, in italics and red colour, relative to separated reagents ( $A+\frac{1}{2}B^0+2AcO^-$ ) plus three explicit MeOH molecules: two active MeOH molecule (close to the reaction center and shadowed in yellow) and one stoichiometric MeOH molecule required to monosolvate one chloride anion (bluish). Characteristic activation energies in the  $S_2$ -reaction channel are shown in green color. The hydrogen bonds are represented by dotted lines.

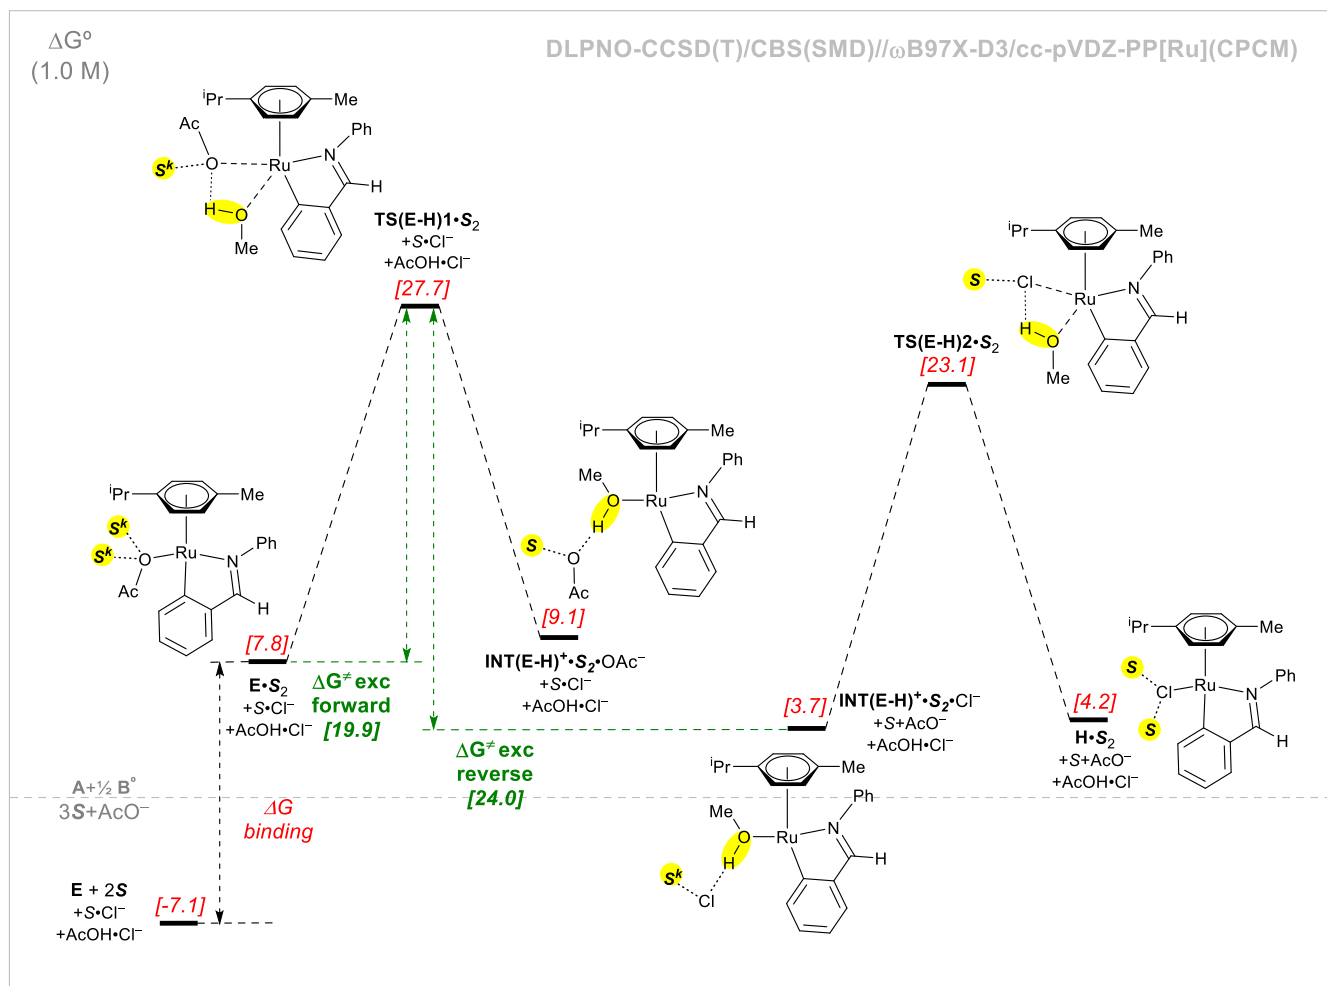



## Computed cartesian coordinates (Å), lowest frequencies (cm<sup>-1</sup>) and energies (a.u.) for all species

Data are tabulated in two columns. The left column includes cartesian coordinates, lowest frequencies and single-point energies calculated using the CPCM solvation model (MeOH) for the stationary points reported in the main text and this supplementary information that were located after geometry optimizations with the M06 functional. The right column includes the corresponding values calculated with either the CPCM or the SMD solvation models (in black and blue colours, respectively) after geometry optimization using the  $\omega$ B97X-D3 functional. DZ, TZ, ATZ, and QZ are used as abbreviations for the basis sets cc-pVDZ-PP[Ru], cc-pVTZ-PP[Ru], aug-cc-pVTZ-PP[Ru] and cc-pVQZ-PP[Ru], respectively, which are described in the computational details.

|                                |             |                                |             |
|--------------------------------|-------------|--------------------------------|-------------|
| <b>A</b>                       |             | <b>A</b>                       |             |
| CPCM (MeOH)                    |             | CPCM (MeOH)                    |             |
| M06 SCF (DZ) =                 | -556.338362 | $\omega$ B97X-D3 SCF (DZ) =    | -556.638383 |
| G (1 atm) =                    | -556.175189 | G (1 atm) =                    | -556.470061 |
| qh-G (1 mol/L) =               | -556.170593 | qh G-E (1 mol/L) =             | 0.173465    |
| qh-G (24.56 mol/L) =           | -556.167571 | qh G-E (24.56 mol/L) =         | 0.176488    |
| Lowest Frequency =             | 36.56       | Lowest Frequency =             | 48.68       |
| HF SCF energy (TZ) =           | -553.323387 | HF SCF energy (TZ) =           | -553.324306 |
| HF SCF energy (QZ) =           | -553.357682 | HF SCF energy (QZ) =           | -553.357973 |
| Correlation energy (DZ) =      | -1.999661   | Correlation energy (DZ) =      | -2.000116   |
| Correlation energy (TZ) =      | -2.396219   | Correlation energy (TZ) =      | -2.396373   |
| DLPNO-CCSD(T1)/CBS =           | -555.995957 | DLPNO-CCSD(T1)/CBS =           | -555.996039 |
| PBE0+D3BJ (ATZ) =              | -556.304776 | PBE0+D3BJ (ATZ) =              | -556.304514 |
| M06-2X (ATZ) =                 | -556.714303 | M06-2X (ATZ) =                 | -556.718671 |
| $\omega$ B97M-V (ATZ) =        | -556.727447 | $\omega$ B97M-V (ATZ) =        | -556.728137 |
| B2GP-PLYP (ATZ) =              | -556.359743 | B2GP-PLYP (ATZ) =              | -556.363482 |
| B2K-PLYP (ATZ) =               | -556.281548 | B2K-PLYP (ATZ) =               | -556.286137 |
| PWPB95 (ATZ) =                 | -556.520809 | PWPB95 (ATZ) =                 | -556.523008 |
| PWPB95+D3BJ (ATZ) =            | -556.532185 | PWPB95+D3BJ (ATZ) =            | -556.534375 |
| PWPB95+D4 (ATZ) =              | -556.542117 | PWPB95+D4 (ATZ) =              | -556.544276 |
| <b>* xyz 0 1</b>               |             | <b>SMD (MeOH)</b>              |             |
| C -0.394341 0.387316 -0.161724 |             | HF SCF energy (TZ) =           | -553.329906 |
| C -1.840318 0.174932 -0.079571 |             | HF SCF energy (QZ) =           | -553.363579 |
| N 0.453965 -0.523584 0.132117  |             | Correlation energy (DZ) =      | -1.999246   |
| C -2.705772 1.213713 -0.443127 |             | Correlation energy (TZ) =      | -2.395775   |
| C -2.376706 -1.046231 0.354561 |             | DLPNO-CCSD(T1)/CBS =           | -556.001210 |
| C 1.824324 -0.227067 0.077109  |             | <b>* xyz 0 1</b>               |             |
| C -4.085024 1.039010 -0.374921 |             | C -0.386124 0.375467 -0.174879 |             |
| C -3.752129 -1.219613 0.421194 |             | C -1.843678 0.168034 -0.088743 |             |
| C 2.363192 0.991249 0.516830   |             | N 0.450527 -0.528907 0.160407  |             |
| C 2.690910 -1.221796 -0.397203 |             | C -2.704062 1.199695 -0.481696 |             |
| C -4.609200 -0.177457 0.057035 |             | C -2.382373 -1.038409 0.381276 |             |
| C 3.736406 1.212433 0.455403   |             | C 1.830004 -0.229600 0.091445  |             |
| C 4.059122 -0.988376 -0.472240 |             | C -4.086241 1.031414 -0.406223 |             |
| C 4.588853 0.230452 -0.046522  |             | C -3.760553 -1.205753 0.454630 |             |
| H -0.079648 1.391490 -0.514115 |             | C 2.367231 0.975191 0.565408   |             |
| H -2.286623 2.166481 -0.781691 |             | C 2.689078 -1.207317 -0.427496 |             |
| H -1.690795 -1.849499 0.634500 |             | C -4.615145 -0.171015 0.061526 |             |
| H -4.753882 1.854605 -0.660000 |             | C 3.741385 1.202940 0.494150   |             |
| H -4.166032 -2.172824 0.759641 |             | C 4.058175 -0.968011 -0.508357 |             |
| H 1.702483 1.753906 0.939370   |             | C 4.590579 0.238354 -0.047627  |             |
| H 2.260788 -2.175233 -0.715723 |             |                                |             |

|   |           |           |           |
|---|-----------|-----------|-----------|
| H | -5.691834 | -0.317348 | 0.111387  |
| H | 4.145159  | 2.161955  | 0.811429  |
| H | 4.720669  | -1.768307 | -0.858475 |
| H | 5.666057  | 0.408472  | -0.092087 |

\*

-----

**AcO<sup>-</sup>**

CPCM (MeOH)  
M06 SCF (DZ) = -228.489667  
G (1 atm) = -228.468780  
qh-G (1 mol/L) = -228.465292  
qh-G (24.56 mol/L) = -228.462270  
Lowest Frequency = 59.09

HF SCF energy (TZ) = -227.428657  
HF SCF energy (QZ) = -227.449100  
Correlation energy (DZ) = -0.677188  
Correlation energy (TZ) = -0.849914  
DLPNO-CCSD(T1)/CBS = -228.407144

PBE0+D3BJ (ATZ) = -228.468326  
M06-2X (ATZ) = -228.635796  
wB97M-V (ATZ) = -228.647626  
B2GP-PLYP (ATZ) = -228.524276  
B2K-PLYP (ATZ) = -228.495969  
PWPB95 (ATZ) = -228.577108  
PWPB95+D3BJ (ATZ) = -228.578246  
PWPB95+D4 (ATZ) = -228.580712

\*xyz -1 1

|   |           |           |           |
|---|-----------|-----------|-----------|
| C | -0.198859 | 0.000241  | -0.003911 |
| C | 1.340779  | -0.053193 | -0.001954 |
| O | -0.699107 | 1.151711  | 0.000733  |
| H | -0.807580 | -1.096130 | 0.000823  |
| H | 1.746985  | 0.581405  | -0.807952 |
| H | 1.724599  | 0.369189  | 0.943297  |
| O | 1.730389  | -1.077525 | -0.112606 |

\*

-----

**AcOH**

CPCM (MeOH)  
M06 SCF (DZ) = -228.978659  
G (1 atm) = -228.944284  
qh-G (1 mol/L) = -228.941066  
qh-G (24.56 mol/L) = -228.938043  
Lowest Frequency = 90.03

HF SCF energy (TZ) = -227.913634  
HF SCF energy (QZ) = -227.931207  
Correlation energy (DZ) = -0.681337

|   |           |           |           |
|---|-----------|-----------|-----------|
| H | -0.060305 | 1.360789  | -0.554875 |
| H | -2.285560 | 2.140822  | -0.848711 |
| H | -1.704232 | -1.837599 | 0.685736  |
| H | -4.751627 | 1.841377  | -0.712370 |
| H | -4.175209 | -2.146796 | 0.822628  |
| H | 1.709549  | 1.723840  | 1.013873  |
| H | 2.262637  | -2.150797 | -0.775340 |
| H | -5.697626 | -0.304522 | 0.122259  |
| H | 4.150283  | 2.142359  | 0.873436  |
| H | 4.716749  | -1.732683 | -0.926706 |
| H | 5.666161  | 0.419805  | -0.100572 |

\*

-----

**AcO<sup>-</sup>**

CPCM (MeOH)  
wB97X-D3 SCF (DZ) = -228.557587  
G (1 atm) = -228.535538  
qh G-E (1 mol/L) = 0.025811  
qh G-E (24.56 mol/L) = 0.028834  
Lowest Frequency = 53.83

HF SCF energy (TZ) = -553.324306  
HF SCF energy (QZ) = -553.357974  
Correlation energy (DZ) = -2.000116  
Correlation energy (TZ) = -2.396373  
DLPNO-CCSD(T1)/CBS = -228.407396

PBE0+D3BJ (ATZ) = -228.468592  
M06-2X (ATZ) = -228.632204  
wB97M-V (ATZ) = -228.644075  
B2GP-PLYP (ATZ) = -228.520688  
B2K-PLYP (ATZ) = -228.492208  
PWPB95 (ATZ) = -228.573373  
PWPB95+D3BJ (ATZ) = -228.574511  
PWPB95+D4 (ATZ) = -228.576973

SMD (MeOH)

HF SCF energy (TZ) = -227.438035  
HF SCF energy (QZ) = -227.458181  
Correlation energy (DZ) = -0.674618  
Correlation energy (TZ) = -0.847594  
DLPNO-CCSD(T1)/CBS = -228.412921

\* xyz -1 1

|   |           |           |           |
|---|-----------|-----------|-----------|
| C | 0.191240  | -0.027724 | 0.075343  |
| C | -1.349267 | -0.025284 | -0.006489 |
| O | 0.772984  | 1.067356  | -0.129474 |
| H | -1.724880 | 0.826127  | -0.592967 |
| H | -1.765214 | 0.057371  | 1.012338  |
| H | -1.724238 | -0.967961 | -0.433330 |
| O | 0.732314  | -1.125085 | 0.364718  |

\*

-----

**AcOH**

CPCM (MeOH)  
wB97X-D3 SCF (DZ) = -229.048486  
G (1 atm) = -229.013388  
qh G-E (1 mol/L) = 0.038591  
qh G-E (24.56 mol/L) = 0.041614  
Lowest Frequency = 137.71

HF SCF energy (TZ) = -227.913954  
HF SCF energy (QZ) = -227.931304  
Correlation energy (DZ) = -0.681429

Correlation energy (TZ) = -0.847263  
DLPNO-CCSD(T1)/CBS = -228.880721

PBE0+D3BJ (ATZ) = -228.940655  
M06-2X (ATZ) = -229.100780  
wB97M-V (ATZ) = -229.111994  
B2GP-PLYP (ATZ) = -228.990109  
B2K-PLYP (ATZ) = -228.962015  
PWPB95 (ATZ) = -229.044860  
PWPB95+D3BJ (ATZ) = -229.046146  
PWPB95+D4 (ATZ) = -229.048126

\*xyz 0 1

C -0.091646 0.121378 0.000044  
C 1.384977 -0.098574 0.000048  
O -0.761256 -1.043537 -0.000029  
O -0.652173 1.192711 -0.000049  
H 1.673179 -0.686235 0.884165  
H 1.673181 -0.686320 -0.884012  
H 1.910037 0.862780 0.000004  
H -1.708948 -0.820446 -0.000086

\*

-----

**AcOH•AcO<sup>-</sup>**

CPCM (MeOH)  
M06 SCF (DZ) = -457.502185  
G (1 atm) = -457.429534  
qh-G (1 mol/L) = -457.425008  
qh-G (24.56 mol/L) = -457.421985  
Lowest Frequency = 46.07

HF SCF energy (TZ) = -455.348140  
HF SCF energy (QZ) = -455.384075  
Correlation energy (DZ) = -1.372378  
Correlation energy (TZ) = -1.712634  
DLPNO-CCSD(T1)/CBS = -457.306359

PBE0+D3BJ (ATZ) = -457.429410  
M06-2X (ATZ) = -457.755001  
wB97M-V (ATZ) = -457.775767  
B2GP-PLYP (ATZ) = -457.529071  
B2K-PLYP (ATZ) = -457.472991  
PWPB95 (ATZ) = -457.635496  
PWPB95+D3BJ (ATZ) = -457.639210  
PWPB95+D4 (ATZ) = -457.644745

\*xyz -1 1

C 1.766740 0.004695 0.156664  
C 3.230807 0.028502 -0.231153  
O 1.060045 -0.825225 -0.533012  
O 1.340189 0.736718 1.054896  
H 3.329893 0.278880 -1.299127  
H 3.668261 -0.974020 -0.102016  
H 3.792593 0.754985 0.370902  
H -0.135225 -0.894021 -0.135839  
C -2.026728 -0.072103 -0.010177  
C -1.417256 1.131572 -0.691416  
O -1.220834 -1.069216 0.210801

Correlation energy (TZ) = -0.847288  
DLPNO-CCSD(T1)/CBS = -228.880737

PBE0+D3BJ (ATZ) = -228.940710  
M06-2X (ATZ) = -229.100081  
wB97M-V (ATZ) = -229.110933  
B2GP-PLYP (ATZ) = -228.989106  
B2K-PLYP (ATZ) = -228.961006  
PWPB95 (ATZ) = -229.043873  
PWPB95+D3BJ (ATZ) = -229.045158  
PWPB95+D4 (ATZ) = -229.047134

SMD (MeOH)

HF SCF energy (TZ) = -227.915396  
HF SCF energy (QZ) = -227.932704  
Correlation energy (DZ) = -0.679753  
Correlation energy (TZ) = -0.845832  
DLPNO-CCSD(T1)/CBS = -228.880798

\*xyz 0 1

C -0.092155 0.119565 0.000210  
C 1.391722 -0.108245 0.000036  
O -0.774773 -1.037263 -0.000071  
O -0.643484 1.196572 -0.000080  
H 1.675918 -0.693158 0.886312  
H 1.675726 -0.693290 -0.886216  
H 1.915794 0.852866 -0.000094  
H -1.718787 -0.808811 -0.000267

\*

-----

**AcOH•AcO<sup>-</sup>**

CPCM (MeOH)  
wB97X-D3 SCF (DZ) = -457.638800  
G (1 atm) = -457.562525  
qh G-E (1 mol/L) = 0.082408  
qh G-E (24.56 mol/L) = 0.085430  
Lowest Frequency = 22.25

HF SCF energy (TZ) = -455.351730  
HF SCF energy (QZ) = -455.387455  
Correlation energy (DZ) = -1.370723  
Correlation energy (TZ) = -1.710766  
DLPNO-CCSD(T1)/CBS = -457.307685

PBE0+D3BJ (ATZ) = -457.430078  
M06-2X (ATZ) = -457.753071  
wB97M-V (ATZ) = -457.773874  
B2GP-PLYP (ATZ) = -457.527279  
B2K-PLYP (ATZ) = -457.471171  
PWPB95 (ATZ) = -457.633672  
PWPB95+D3BJ (ATZ) = -457.637380  
PWPB95+D4 (ATZ) = -457.642810

SMD (MeOH)

HF SCF energy (TZ) = -455.356570  
HF SCF energy (QZ) = -455.391748  
Correlation energy (DZ) = -1.366783  
Correlation energy (TZ) = -1.707262  
DLPNO-CCSD(T1)/CBS = -457.308563

\*xyz -1 1

C 1.805466 0.023444 0.138662  
C 3.284790 0.024529 -0.232315  
O 1.092494 -0.828637 -0.497939  
O 1.386301 0.824622 0.992716

|   |           |           |           |
|---|-----------|-----------|-----------|
| O | -3.209934 | -0.090335 | 0.316653  |
| H | -0.948916 | 0.835032  | -1.643455 |
| H | -0.606041 | 1.525132  | -0.056919 |
| H | -2.177662 | 1.902471  | -0.871762 |

\*

-----

**AcOH•Cl<sup>-</sup>**

CPCM (MeOH)  
M06 SCF (DZ) = -689.348508  
G (1 atm) = -689.318052  
qh-G (1 mol/L) = -689.314583  
qh-G (24.56 mol/L) = -689.311561  
Lowest Frequency = 73.00

HF SCF energy (TZ) = -687.595253  
HF SCF energy (QZ) = -687.618072  
Correlation energy (DZ) = -0.836980  
Correlation energy (TZ) = -1.077866  
DLPNO-CCSD(T1)/CBS = -688.843573

PBE0+D3BJ (ATZ) = -689.199269  
M06-2X (ATZ) = -689.498094  
wB97M-V (ATZ) = -689.499859  
B2GP-PLYP (ATZ) = -689.227255  
B2K-PLYP (ATZ) = -689.168414  
PWPB95 (ATZ) = -689.404594  
PWPB95+D3BJ (ATZ) = -689.406725  
PWPB95+D4 (ATZ) = -689.409408

\*xyz -1 1

|    |           |           |           |
|----|-----------|-----------|-----------|
| O  | -0.470535 | -1.037237 | 0.017412  |
| C  | -1.404213 | -0.091669 | -0.001022 |
| H  | 0.457581  | -0.652676 | 0.017000  |
| C  | -0.910539 | 1.326456  | 0.005780  |
| O  | -2.580474 | -0.391641 | -0.016500 |
| Cl | 2.361626  | -0.020840 | -0.005574 |
| H  | -0.201681 | 1.489151  | -0.820287 |
| H  | -0.349170 | 1.521653  | 0.932846  |
| H  | -1.757795 | 2.018456  | -0.070645 |

\*

-----

**B<sup>0</sup>**

CPCM (MeOH)  
M06 SCF (DZ) = -2808.636857  
G (1 atm) = -2808.270709  
qh-G (1 mol/L) = -2808.261688  
qh-G (24.56 mol/L) = -2808.258666  
Lowest Frequency = 5.95

HF SCF energy (TZ) = -2799.849316

|   |           |           |           |
|---|-----------|-----------|-----------|
| H | 3.395921  | 0.316732  | -1.288115 |
| H | 3.699027  | -0.989934 | -0.133449 |
| H | 3.853620  | 0.720319  | 0.397790  |
| C | -2.068404 | -0.072964 | -0.030663 |
| C | -1.431100 | 1.130627  | -0.684881 |
| O | -1.271180 | -1.088307 | 0.224912  |
| O | -3.256323 | -0.116807 | 0.256624  |
| H | -0.997327 | 0.839765  | -1.653261 |
| H | -0.599363 | 1.478398  | -0.053399 |
| H | -2.177415 | 1.920110  | -0.829933 |
| H | -0.270577 | -0.908830 | -0.071708 |

\*

-----

**AcOH•Cl<sup>-</sup>**

CPCM (MeOH)  
wB97X-D3 SCF (DZ) = -689.432595  
G (1 atm) = -689.401220  
qh G-E (1 mol/L) = 0.035173  
qh G-E (24.56 mol/L) = 0.038196  
Lowest Frequency = 71.1

HF SCF energy (TZ) = -687.595798  
HF SCF energy (QZ) = -687.618431  
Correlation energy (DZ) = -0.836947  
Correlation energy (TZ) = -1.077819  
DLPNO-CCSD(T1)/CBS = -228.880737

PBE0+D3BJ (ATZ) = -689.199438  
M06-2X (ATZ) = -689.496550  
wB97M-V (ATZ) = -689.498487  
B2GP-PLYP (ATZ) = -689.225933  
B2K-PLYP (ATZ) = -689.167088  
PWPB95 (ATZ) = -689.403170  
PWPB95+D3BJ (ATZ) = -689.405290  
PWPB95+D4 (ATZ) = -689.407963

SMD (MeOH)

HF SCF energy (TZ) = -687.591537  
HF SCF energy (QZ) = -687.614395  
Correlation energy (DZ) = -0.835336  
Correlation energy (TZ) = -1.076439  
DLPNO-CCSD(T1)/CBS = -688.841535

\*xyz -1 1

|    |           |           |           |
|----|-----------|-----------|-----------|
| O  | -0.459942 | -1.033698 | 0.012590  |
| C  | -1.396282 | -0.089851 | -0.007965 |
| H  | -0.916266 | 1.339513  | 0.000703  |
| C  | -2.570567 | -0.403696 | -0.032278 |
| O  | 0.463726  | -0.647916 | 0.029352  |
| Cl | -0.276515 | 1.524732  | -0.874446 |
| H  | -0.298795 | 1.522717  | 0.892053  |
| H  | -1.776510 | 2.017858  | -0.009765 |
| H  | 2.375950  | -0.068007 | 0.048767  |

\*

-----

**B<sup>0</sup>**

CPCM (MeOH)  
wB97X-D3 SCF (DZ) = -2809.200467  
G (1 atm) = -2808.820780  
qh G-E (1 mol/L) = 0.391637  
qh G-E (24.56 mol/L) = 0.394660  
Lowest Frequency = 13.84

HF SCF energy (TZ) = -2799.852924

HF SCF energy (QZ) = -2799.913015  
 Correlation energy (DZ) = -4.615789  
 Correlation energy (TZ) = -5.832394  
 DLPNO-CCSD(T1)/CBS = -2806.475507

PBE0+D3BJ (ATZ) = -2808.175246  
 M06-2X (ATZ) = -2809.018282  
 wB97M-V (ATZ) = -2809.060377  
 B2GP-PLYP (ATZ) = -2807.966640  
 B2K-PLYP (ATZ) = -2807.723402  
 PWPB95 (ATZ) = -2808.706555  
 PWPB95+D3BJ (ATZ) = -2808.754580  
 PWPB95+D4 (ATZ) = -2808.757637

\*xyz 0 1

|    |           |           |           |
|----|-----------|-----------|-----------|
| C  | -3.979983 | -0.182404 | 0.126288  |
| C  | -4.877559 | 1.026961  | 0.086793  |
| C  | -3.747759 | -0.930662 | -1.072356 |
| C  | -6.326937 | 0.554249  | 0.186643  |
| C  | -4.561495 | 2.062203  | 1.152489  |
| C  | -3.300562 | -0.607430 | 1.295131  |
| C  | -2.882749 | -2.045176 | -1.086525 |
| C  | -2.439027 | -1.743403 | 1.289248  |
| C  | -2.218850 | -2.482543 | 0.105563  |
| C  | -1.256563 | -3.620634 | 0.078676  |
| Ru | -1.841473 | -0.341596 | -0.263015 |
| Cl | -1.807797 | 1.639823  | -1.688599 |
| H  | -4.725494 | 1.490738  | -0.905324 |
| H  | -4.161008 | -0.561334 | -2.015435 |
| H  | -7.015864 | 1.409816  | 0.108929  |
| H  | -6.506493 | 0.059640  | 1.157046  |
| H  | -6.580318 | -0.162009 | -0.611378 |
| H  | -3.501912 | 2.364641  | 1.127376  |
| H  | -4.794707 | 1.689201  | 2.164581  |
| H  | -5.175992 | 2.961443  | 0.992919  |
| H  | -3.347241 | 0.006205  | 2.198296  |
| H  | -2.641367 | -2.527497 | -2.037601 |
| H  | -1.852269 | -1.978870 | 2.181423  |
| H  | -0.433291 | -3.455078 | 0.789687  |
| H  | -1.779676 | -4.549022 | 0.360914  |
| H  | -0.832270 | -3.760923 | -0.925472 |
| C  | 1.256091  | 3.620505  | -0.077996 |
| C  | 2.218572  | 2.482576  | -0.105134 |
| C  | 2.882703  | 2.045034  | 1.086749  |
| C  | 2.438680  | 1.743743  | -1.289026 |
| C  | 3.747879  | 0.930648  | 1.072172  |
| C  | 3.300331  | 0.607871  | -1.295296 |
| C  | 3.980004  | 0.182666  | -0.126662 |
| C  | 4.877610  | -1.026699 | -0.087465 |
| C  | 6.326998  | -0.554016 | -0.187212 |
| C  | 4.561508  | -2.061702 | -1.153383 |
| Ru | 1.841536  | 0.341483  | 0.263069  |
| Cl | 1.808062  | -1.639798 | 1.688784  |
| H  | 0.432045  | 3.454218  | -0.787957 |
| H  | 1.778698  | 4.548759  | -0.361611 |
| H  | 0.832933  | 3.761532  | 0.926524  |
| H  | 2.641431  | 2.527114  | 2.037975  |
| H  | 1.851826  | 1.979417  | -2.181084 |
| H  | 4.161310  | 0.561158  | 2.015109  |
| H  | 3.346926  | -0.005557 | -2.198605 |
| H  | 4.725532  | -1.490701 | 0.904546  |
| H  | 7.015901  | -1.409613 | -0.109624 |
| H  | 6.506585  | -0.059255 | -1.157531 |
| H  | 6.580396  | 0.162105  | 0.610927  |
| H  | 3.501947  | -2.364221 | -1.128230 |
| H  | 4.794581  | -1.688432 | -2.165407 |

HF SCF energy (QZ) = -2799.915306  
 Correlation energy (DZ) = -4.614899  
 Correlation energy (TZ) = -5.831790  
 DLPNO-CCSD(T1)/CBS = -2806.476966

PBE0+D3BJ (ATZ) = -2808.176306  
 M06-2X (ATZ) = -2809.026902  
 wB97M-V (ATZ) = -2809.067874  
 B2GP-PLYP (ATZ) = -2807.978585  
 B2K-PLYP (ATZ) = -2807.736773  
 PWPB95 (ATZ) = -2808.716045  
 PWPB95+D3BJ (ATZ) = -2808.763972  
 PWPB95+D4 (ATZ) = -2808.766988

SMD (MeOH)

HF SCF energy (TZ) = -2799.859088  
 HF SCF energy (QZ) = -2799.921684  
 Correlation energy (DZ) = -4.616808  
 Correlation energy (TZ) = -5.833040  
 DLPNO-CCSD(T1)/CBS = -2806.484273

\*xyz 0 1

|    |           |           |           |
|----|-----------|-----------|-----------|
| C  | -3.980964 | -0.183264 | 0.108095  |
| C  | -4.899958 | 1.019639  | 0.077352  |
| C  | -3.742396 | -0.926117 | -1.093786 |
| C  | -6.343814 | 0.528619  | 0.247331  |
| C  | -4.545411 | 2.094584  | 1.101893  |
| C  | -3.305470 | -0.609022 | 1.274776  |
| C  | -2.875776 | -2.036282 | -1.112076 |
| C  | -2.440439 | -1.744715 | 1.266187  |
| C  | -2.216020 | -2.476893 | 0.082344  |
| C  | -1.270285 | -3.639736 | 0.056840  |
| Ru | -1.840228 | -0.338460 | -0.276725 |
| Cl | -1.824303 | 1.640503  | -1.704224 |
| H  | -4.797822 | 1.458347  | -0.928489 |
| H  | -4.159823 | -0.562768 | -2.034440 |
| H  | -7.045420 | 1.371505  | 0.160950  |
| H  | -6.482325 | 0.065758  | 1.237941  |
| H  | -6.609085 | -0.216479 | -0.518110 |
| H  | -3.496851 | 2.413869  | 1.002742  |
| H  | -4.709023 | 1.747271  | 2.134340  |
| H  | -5.186095 | 2.975137  | 0.948655  |
| H  | -3.367467 | -0.011629 | 2.184865  |
| H  | -2.645068 | -2.519681 | -2.062619 |
| H  | -1.871195 | -1.990597 | 2.163847  |
| H  | -0.479372 | -3.519669 | 0.808914  |
| H  | -1.834578 | -4.557532 | 0.283367  |
| H  | -0.808787 | -3.753528 | -0.932162 |
| C  | 1.269807  | 3.639564  | -0.055947 |
| C  | 2.215708  | 2.476863  | -0.081846 |
| C  | 2.875848  | 2.036153  | 1.112321  |
| C  | 2.439901  | 1.744916  | -1.265880 |
| C  | 3.742598  | 0.926095  | 1.093614  |
| C  | 3.305066  | 0.609337  | -1.274877 |
| C  | 3.980923  | 0.183455  | -0.108445 |
| C  | 4.900041  | -1.019366 | -0.078132 |
| C  | 6.343831  | -0.528184 | -0.248190 |
| C  | 4.545464  | -2.094076 | -1.102910 |
| Ru | 1.840290  | 0.338328  | 0.276968  |
| Cl | 1.824897  | -1.640597 | 1.704508  |
| H  | 0.478490  | 3.519247  | -0.807555 |
| H  | 1.833833  | 4.557410  | -0.282934 |
| H  | 0.808851  | 3.753424  | 0.933299  |
| H  | 2.645352  | 2.519377  | 2.063005  |
| H  | 1.870373  | 1.990869  | -2.163341 |
| H  | 4.160313  | 0.562643  | 2.034099  |

|    |           |           |           |
|----|-----------|-----------|-----------|
| H  | 5.176078  | -2.960945 | -0.994104 |
| Cl | 0.362668  | -0.927698 | -1.310703 |
| Cl | -0.362604 | 0.927185  | 1.311020  |

\*

-----

|    |           |           |           |
|----|-----------|-----------|-----------|
| H  | 3.366873  | 0.012094  | -2.185078 |
| H  | 4.798074  | -1.458337 | 0.927613  |
| H  | 7.045519  | -1.371032 | -0.162103 |
| H  | 6.482165  | -0.065083 | -1.238712 |
| H  | 6.609148  | 0.216759  | 0.517387  |
| H  | 3.496938  | -2.413477 | -1.003754 |
| H  | 4.708939  | -1.746471 | -2.135280 |
| H  | 5.186232  | -2.974619 | -0.949976 |
| Cl | 0.363924  | -0.918606 | -1.296608 |
| Cl | -0.363854 | 0.918166  | 1.297086  |

\*

-----

**B<sup>0+</sup>**

CPCM (MeOH)

M06 SCF (DZ) = -2348.247695

G (1 atm) = -2347.877346

qh-G (1 mol/L) = -2347.869537

qh-G (24.56 mol/L) = -2347.866515

Lowest Frequency = 9.36

HF SCF energy (TZ) = -2340.165822

HF SCF energy (QZ) = -2340.226362

Correlation energy (DZ) = -4.447875

Correlation energy (TZ) = -5.594326

DLPNO-CCSD(T1)/CBS = -2346.508841

\*xyz 1 1

|   |           |           |           |
|---|-----------|-----------|-----------|
| C | -3.502385 | 0.254739  | 0.617285  |
| C | -3.760145 | 1.428306  | 1.527066  |
| C | -3.527928 | 0.350723  | -0.794771 |
| C | -5.210933 | 1.350599  | 2.001668  |
| C | -3.457995 | 2.776471  | 0.895494  |
| H | -3.099837 | 1.293989  | 2.404403  |
| C | -3.161117 | -1.015493 | 1.185029  |
| C | -3.223086 | -0.772639 | -1.618275 |
| H | -3.667755 | 1.324816  | -1.269315 |
| H | -5.428588 | 0.394344  | 2.503261  |
| H | -5.902010 | 1.453844  | 1.147588  |
| H | -5.422423 | 2.165126  | 2.711324  |
| H | -2.434062 | 2.822753  | 0.490073  |
| H | -4.166331 | 3.011540  | 0.083042  |
| H | -3.561071 | 3.570874  | 1.649989  |
| C | -2.859843 | -2.128668 | 0.373648  |
| H | -3.023572 | -1.090984 | 2.267845  |
| C | -2.889249 | -2.027781 | -1.053988 |
| H | -3.144695 | -0.637433 | -2.700005 |
| H | -2.497667 | -3.050096 | 0.836737  |
| C | -2.486593 | -3.177360 | -1.912627 |
| H | -1.780849 | -3.839477 | -1.391607 |
| H | -3.379766 | -3.770789 | -2.167022 |
| H | -2.030697 | -2.832709 | -2.851686 |
| C | 2.415056  | 3.410269  | -1.450320 |
| C | 2.855468  | 2.137498  | -0.812243 |
| H | 1.714768  | 3.958283  | -0.803962 |
| H | 3.293260  | 4.053721  | -1.621555 |
| H | 1.938129  | 3.226796  | -2.423407 |
| C | 3.168116  | 0.986507  | -1.603971 |
| C | 2.887921  | 1.996660  | 0.596563  |
| C | 3.503555  | -0.240967 | -0.996553 |
| H | 3.042724  | 1.034059  | -2.688691 |
| C | 3.228044  | 0.753756  | 1.206776  |
| H | 2.547677  | 2.825230  | 1.222831  |
| C | 3.541282  | -0.386279 | 0.428141  |
| H | 3.629687  | -1.129338 | -1.622807 |
| H | 3.129771  | 0.658795  | 2.290715  |

|    |           |           |           |
|----|-----------|-----------|-----------|
| C  | 3.847419  | -1.734142 | 1.028715  |
| C  | 3.239134  | -1.948284 | 2.404109  |
| C  | 5.365584  | -1.906734 | 1.060246  |
| H  | 3.425942  | -2.486745 | 0.336133  |
| H  | 2.152456  | -1.763780 | 2.408024  |
| H  | 3.707099  | -1.295448 | 3.160401  |
| H  | 3.409257  | -2.986279 | 2.727392  |
| H  | 5.812062  | -1.797835 | 0.059234  |
| H  | 5.825531  | -1.154477 | 1.723782  |
| H  | 5.626617  | -2.904678 | 1.444614  |
| Ru | -1.612802 | -0.459377 | -0.212343 |
| Ru | 1.618094  | 0.438583  | -0.197214 |
| Cl | 0.491634  | -1.767211 | -0.506300 |
| Cl | -0.169318 | 0.607659  | 1.525297  |
| Cl | -0.309514 | 1.113537  | -1.630690 |

\*

**B<sup>1</sup>**

CPCM (MeOH)

|                      |              |
|----------------------|--------------|
| M06 SCF (DZ) =       | -1172.476173 |
| G (1 atm) =          | -1172.257738 |
| qh-G (1 mol/L) =     | -1172.252182 |
| qh-G (24.56 mol/L) = | -1172.249159 |
| Lowest Frequency =   | 25.86        |

|                           |              |
|---------------------------|--------------|
| HF SCF energy (TZ) =      | -1167.702638 |
| HF SCF energy (QZ) =      | -1167.747545 |
| Correlation energy (DZ) = | -2.822811    |
| Correlation energy (TZ) = | -3.530360    |
| DLPNO-CCSD(T1)/CBS =      | -1171.704881 |

|                     |              |
|---------------------|--------------|
| PBE0+D3BJ (ATZ) =   | -1172.319333 |
| M06-2X (ATZ) =      | -1172.770100 |
| wB97M-V (ATZ) =     | -1172.811090 |
| B2GP-PLYP (ATZ) =   | -1172.293525 |
| B2K-PLYP (ATZ) =    | -1172.174040 |
| PWPB95 (ATZ) =      | -1172.592978 |
| PWPB95+D3BJ (ATZ) = | -1172.613533 |
| PWPB95+D4 (ATZ) =   | -1172.620329 |

\*xyz 0 1

|    |           |           |           |
|----|-----------|-----------|-----------|
| Ru | -0.311540 | 0.101584  | -0.145732 |
| O  | -2.486014 | 0.033521  | -0.233320 |
| O  | -1.402935 | -1.272948 | 1.120033  |
| C  | -2.508442 | -0.922740 | 0.601180  |
| Cl | -0.382311 | -1.674273 | -1.788724 |
| C  | -3.772745 | -1.636495 | 0.926884  |
| H  | -4.635420 | -0.966263 | 0.822473  |
| H  | -3.895780 | -2.466166 | 0.213006  |
| H  | -3.731248 | -2.059948 | 1.938425  |
| C  | 0.432742  | 1.888845  | -1.115186 |
| C  | 1.463212  | 0.925996  | -1.080470 |
| C  | -0.256863 | 2.255775  | 0.084021  |
| H  | 0.091151  | 2.285226  | -2.074352 |
| C  | 1.840242  | 0.268325  | 0.125851  |
| H  | 1.885378  | 0.568879  | -2.024676 |
| C  | -1.430656 | 3.173665  | 0.029401  |
| C  | 0.144552  | 1.653557  | 1.305118  |
| C  | 2.890728  | -0.813767 | 0.099053  |
| C  | 1.156553  | 0.656219  | 1.312925  |
| H  | -1.092424 | 4.219448  | 0.110263  |
| H  | -1.968641 | 3.066709  | -0.923919 |
| H  | -2.129183 | 2.975533  | 0.854708  |
| H  | -0.417583 | 1.862015  | 2.218741  |
| C  | 2.664151  | -1.909235 | 1.128558  |

**B<sup>1</sup>**

CPCM (MeOH)

|                        |              |
|------------------------|--------------|
| wB97X-D3 SCF (DZ) =    | -1172.815540 |
| G (1 atm) =            | -1172.590581 |
| qh G-E (1 mol/L) =     | 0.231997     |
| qh G-E (24.56 mol/L) = | 0.235020     |
| Lowest Frequency =     | 20.60        |

|                           |              |
|---------------------------|--------------|
| HF SCF energy (TZ) =      | -1167.704129 |
| HF SCF energy (QZ) =      | -1167.748386 |
| Correlation energy (DZ) = | -2.822992    |
| Correlation energy (TZ) = | -3.530291    |
| DLPNO-CCSD(T1)/CBS =      | -1171.705313 |

|                     |              |
|---------------------|--------------|
| PBE0+D3BJ (ATZ) =   | -1172.319786 |
| M06-2X (ATZ) =      | -1172.770408 |
| wB97M-V (ATZ) =     | -1172.811106 |
| B2GP-PLYP (ATZ) =   | -1172.294430 |
| B2K-PLYP (ATZ) =    | -1172.175112 |
| PWPB95 (ATZ) =      | -1172.593761 |
| PWPB95+D3BJ (ATZ) = | -1172.614183 |
| PWPB95+D4 (ATZ) =   | -1172.620961 |

SMD (MeOH)

|                           |              |
|---------------------------|--------------|
| HF SCF energy (TZ) =      | -1167.711868 |
| HF SCF energy (QZ) =      | -1167.756064 |
| Correlation energy (DZ) = | -2.819917    |
| Correlation energy (TZ) = | -3.527579    |
| DLPNO-CCSD(T1)/CBS =      | -1171.710473 |

\*xyz 0 1

|    |           |           |           |
|----|-----------|-----------|-----------|
| Ru | -0.346583 | 0.147443  | 0.086890  |
| C  | 1.568222  | 0.780919  | 0.863672  |
| C  | 1.046074  | 0.550593  | -1.501694 |
| C  | 1.777998  | 0.097788  | -0.353684 |
| C  | 0.639418  | 1.860142  | 0.958552  |
| C  | 0.133461  | 1.619897  | -1.415660 |
| C  | -0.099946 | 2.285161  | -0.168180 |
| Cl | -1.031679 | -0.810646 | 2.206065  |
| C  | 2.699058  | -1.098478 | -0.481161 |
| C  | -1.152022 | 3.349230  | -0.056244 |
| C  | 4.071826  | -0.608281 | -0.958479 |
| C  | 2.806733  | -1.931523 | 0.794458  |
| H  | 2.030560  | 0.412371  | 1.779167  |
| H  | 1.116470  | -0.012310 | -2.434591 |
| H  | 0.423383  | 2.292907  | 1.936097  |
| H  | -0.483141 | 1.869373  | -2.280878 |
| H  | 2.268979  | -1.737108 | -1.270891 |

|   |          |           |           |
|---|----------|-----------|-----------|
| C | 4.265306 | -0.171495 | 0.268678  |
| H | 2.837451 | -1.268924 | -0.907682 |
| H | 1.332041 | 0.101864  | 2.238934  |
| H | 2.812770 | -1.539318 | 2.157519  |
| H | 3.388471 | -2.723799 | 0.974397  |
| H | 1.650021 | -2.335642 | 1.056331  |
| H | 4.455689 | 0.593039  | -0.501579 |
| H | 5.059664 | -0.931409 | 0.201446  |
| H | 4.343622 | 0.315231  | 1.256699  |

\*

-----

|   |           |           |           |
|---|-----------|-----------|-----------|
| H | -2.004238 | 3.129427  | -0.713382 |
| H | -0.724893 | 4.315171  | -0.366304 |
| H | -1.510444 | 3.443535  | 0.976948  |
| H | 3.994698  | -0.057044 | -1.907979 |
| H | 4.525730  | 0.061495  | -0.210265 |
| H | 4.749718  | -1.460882 | -1.112357 |
| H | 1.814984  | -2.239805 | 1.159406  |
| H | 3.317831  | -1.382480 | 1.601233  |
| H | 3.394819  | -2.838936 | 0.594110  |
| O | -1.055871 | -1.706453 | -0.760533 |
| O | -2.416234 | -0.044964 | -0.476662 |
| C | -2.245157 | -1.261161 | -0.804495 |
| C | -3.396460 | -2.137988 | -1.173035 |
| H | -3.064837 | -2.958379 | -1.820186 |
| H | -3.806872 | -2.565576 | -0.245425 |
| H | -4.184195 | -1.552028 | -1.661679 |

\*

-----

### B<sup>1</sup>•S

CPCM (MeOH)

|                        |              |
|------------------------|--------------|
| wB97X-D3 SCF (DZ) =    | -1288.528756 |
| G (1 atm) =            | -1288.256036 |
| qh G-E (1 mol/L) =     | 0.282591     |
| qh G-E (24.56 mol/L) = | 0.285614     |
| Lowest Frequency =     | 20.65        |

SMD (MeOH)

|                           |              |
|---------------------------|--------------|
| HF SCF energy (TZ) =      | -1282.806174 |
| HF SCF energy (QZ) =      | -1282.858935 |
| Correlation energy (DZ) = | -3.200154    |
| Correlation energy (TZ) = | -3.999607    |
| DLPNO-CCSD(T1)/CBS =      | -1287.341590 |

\*xyz 0 1

|    |           |           |           |
|----|-----------|-----------|-----------|
| Ru | -0.356535 | -0.090226 | 0.151894  |
| C  | 1.063583  | 0.577137  | -1.321776 |
| C  | 0.144163  | 1.616063  | -1.074126 |
| C  | 1.779169  | -0.061304 | -0.254490 |
| H  | 1.153869  | 0.179245  | -2.334536 |
| C  | 0.611092  | 1.452880  | 1.314674  |
| C  | 1.546417  | 0.405732  | 1.057352  |
| C  | -0.110232 | 2.062889  | 0.263728  |
| O  | -2.437629 | -0.176259 | -0.402580 |
| O  | -1.080009 | -1.744825 | -1.024222 |
| Cl | -1.029590 | -1.426882 | 2.074247  |
| H  | -0.456092 | 2.008859  | -1.896538 |
| C  | 2.718093  | -1.213767 | -0.555055 |
| H  | 0.375291  | 1.713811  | 2.347209  |
| H  | 1.973557  | -0.127263 | 1.909790  |
| C  | -1.167727 | 3.091979  | 0.536613  |
| C  | -2.270219 | -1.302116 | -0.968432 |
| H  | 0.912712  | -1.616581 | 3.203199  |
| C  | 2.617935  | -2.363554 | 0.447689  |
| C  | 4.147765  | -0.666940 | -0.652205 |
| H  | 2.429644  | -1.599087 | -1.546946 |
| H  | -1.999409 | 2.999194  | -0.174575 |
| H  | -0.731773 | 4.096204  | 0.422067  |
| H  | -1.555618 | 2.997710  | 1.559216  |
| C  | -3.423242 | -2.090639 | -1.498222 |
| O  | 1.746106  | -1.484474 | 3.690478  |
| H  | 1.592434  | -2.760349 | 0.497368  |
| H  | 2.910342  | -2.055040 | 1.463091  |
| H  | 3.286889  | -3.181035 | 0.140354  |
| H  | 4.218041  | 0.144831  | -1.392362 |
| H  | 4.479245  | -0.272250 | 0.322030  |



|   |           |           |           |
|---|-----------|-----------|-----------|
| H | 4.842403  | -1.465679 | -0.952286 |
| H | -4.210291 | -1.419211 | -1.862390 |
| H | -3.833580 | -2.690159 | -0.671347 |
| H | -3.092391 | -2.768879 | -2.293436 |
| C | 1.445858  | -0.653113 | 4.796707  |
| H | 0.707261  | -1.115781 | 5.475394  |
| H | 2.376892  | -0.494700 | 5.359727  |
| H | 1.059519  | 0.334659  | 4.485551  |

\*

-----

**B<sup>1</sup>•S<sub>2</sub>**

CPCM (MeOH)

|                        |              |
|------------------------|--------------|
| wB97X-D3 SCF (DZ) =    | -1404.241013 |
| G (1 atm) =            | -1403.920305 |
| qh G-E (1 mol/L) =     | 0.333096     |
| qh G-E (24.56 mol/L) = | 0.336119     |
| Lowest Frequency =     | 13.2         |

SMD (MeOH)

|                           |              |
|---------------------------|--------------|
| HF SCF energy (TZ) =      | -1397.892595 |
| HF SCF energy (QZ) =      | -1397.961126 |
| Correlation energy (DZ) = | -3.580848    |
| Correlation energy (TZ) = | -4.471754    |
| DLPNO-CCSD(T1)/CBS =      | -1402.974118 |

\*xyz 0 1

|    |           |           |           |
|----|-----------|-----------|-----------|
| Ru | -0.366441 | -0.184297 | 0.175564  |
| C  | 1.047215  | 0.542356  | -1.262415 |
| C  | 0.091487  | 1.553378  | -1.020550 |
| C  | 1.778403  | -0.080157 | -0.199466 |
| C  | 0.539617  | 1.374921  | 1.374388  |
| C  | 1.512836  | 0.369488  | 1.113821  |
| C  | -0.195501 | 1.967777  | 0.317671  |
| Cl | -0.867971 | -1.788300 | 1.956200  |
| C  | 2.768759  | -1.186162 | -0.507243 |
| C  | -1.306554 | 2.932804  | 0.608721  |
| C  | 2.794195  | -2.296381 | 0.542674  |
| C  | 4.155953  | -0.562490 | -0.706045 |
| H  | 1.155640  | 0.151516  | -2.276572 |
| H  | -0.509120 | 1.935735  | -1.847231 |
| H  | 0.276210  | 1.611694  | 2.405748  |
| H  | 1.944353  | -0.149876 | 1.972901  |
| H  | 2.450862  | -1.629857 | -1.465485 |
| H  | -2.075677 | 2.896421  | -0.173857 |
| H  | -0.897206 | 3.954052  | 0.643326  |
| H  | -1.763001 | 2.702437  | 1.580564  |
| H  | 3.155546  | -1.934299 | 1.517922  |
| H  | 1.793844  | -2.730835 | 0.690252  |
| H  | 3.473035  | -3.097982 | 0.216050  |
| H  | 4.139960  | 0.212054  | -1.488017 |
| H  | 4.509173  | -0.098025 | 0.229035  |
| H  | 4.882852  | -1.333667 | -1.001860 |
| O  | -2.489565 | -0.233345 | -0.180741 |
| O  | -1.191244 | -1.677974 | -1.138893 |
| C  | -2.373051 | -1.268889 | -0.909210 |
| C  | -3.569683 | -1.997276 | -1.427199 |
| H  | -4.403909 | -1.302280 | -1.580371 |
| H  | -3.868381 | -2.739909 | -0.671661 |
| H  | -3.325891 | -2.523793 | -2.357509 |
| O  | -1.818100 | 0.936132  | 3.443571  |
| C  | -2.800657 | 0.630751  | 4.416940  |
| H  | -1.564065 | 0.100347  | 3.014657  |
| H  | -2.411290 | -0.044180 | 5.199974  |
| H  | -3.101262 | 1.573676  | 4.895312  |
| H  | -3.698171 | 0.168259  | 3.970365  |

|   |          |           |          |
|---|----------|-----------|----------|
| O | 1.725180 | -1.383332 | 3.815836 |
| C | 1.088933 | -0.693661 | 4.878989 |
| H | 1.015724 | -1.738462 | 3.253268 |
| H | 0.634505 | -1.390251 | 5.607187 |
| H | 0.302135 | -0.008599 | 4.518290 |
| H | 1.853467 | -0.102116 | 5.403225 |

\*

**B<sup>1</sup>•S<sub>3</sub><sup>k</sup>**

CPCM (MeOH)  
wB97X-D3 SCF (DZ) = -1519.950272  
G (1 atm) = -1519.580256  
qh G-E (1 mol/L) = 0.383935  
qh G-E (24.56 mol/L) = 0.386958  
Lowest Frequency = 11.81

SMD (MeOH)  
HF SCF energy (TZ) = -1512.996941  
HF SCF energy (QZ) = -1513.065938  
Correlation energy (DZ) = -3.960078  
Correlation energy (TZ) = -4.942582  
DLPNO-CCSD(T1)/CBS = -1518.603423

\*xyz 0 1

|    |           |           |           |
|----|-----------|-----------|-----------|
| Ru | -0.188594 | -0.789463 | 0.187138  |
| Cl | -0.717069 | -2.117012 | 2.173247  |
| C  | 1.086188  | 0.129704  | -1.290081 |
| C  | -0.054683 | 0.934204  | -1.103970 |
| C  | 1.892282  | -0.289566 | -0.180005 |
| C  | -0.441449 | 1.367129  | 0.206884  |
| C  | 3.061363  | -1.224907 | -0.419151 |
| C  | 1.526231  | 0.163663  | 1.106150  |
| C  | -1.716116 | 2.128587  | 0.426551  |
| C  | 0.373915  | 0.984080  | 1.295214  |
| C  | 3.209090  | -2.304011 | 0.653168  |
| C  | 4.336879  | -0.385144 | -0.561991 |
| H  | 1.290506  | -0.298952 | -2.272892 |
| H  | -0.709015 | 1.139083  | -1.953232 |
| H  | 2.865339  | -1.721028 | -1.383529 |
| H  | 2.034526  | -0.219766 | 1.993509  |
| H  | -2.102452 | 1.938869  | 1.436623  |
| H  | -1.518210 | 3.206123  | 0.319264  |
| H  | -2.475236 | 1.846175  | -0.315339 |
| H  | 0.040700  | 1.216143  | 2.308101  |
| H  | 2.288957  | -2.901005 | 0.748096  |
| H  | 3.441610  | -1.877621 | 1.641356  |
| H  | 4.030497  | -2.983763 | 0.382395  |
| H  | 4.231995  | 0.372222  | -1.353914 |
| H  | 4.568538  | 0.135024  | 0.381682  |
| H  | 5.190955  | -1.030419 | -0.816396 |
| O  | -0.404008 | -2.663341 | -0.871691 |
| C  | -1.667710 | -2.502871 | -0.968488 |
| O  | -2.136559 | -1.416969 | -0.515414 |
| C  | -2.546961 | -3.559164 | -1.550125 |
| H  | -3.026227 | -4.099809 | -0.719925 |
| H  | -1.958991 | -4.266659 | -2.145873 |
| H  | -3.335513 | -3.099342 | -2.158880 |
| O  | 1.186582  | -2.536958 | -3.169734 |
| C  | 0.169863  | -2.217762 | -4.100779 |
| H  | 0.734766  | -2.760793 | -2.337274 |
| H  | -0.472956 | -1.387497 | -3.751303 |
| H  | -0.478818 | -3.084254 | -4.324247 |
| H  | 0.654034  | -1.902876 | -5.036471 |
| O  | 1.960756  | -1.419366 | 3.854455  |
| C  | 1.311517  | -0.750103 | 4.922798  |

|   |           |           |          |
|---|-----------|-----------|----------|
| H | 1.263943  | -1.864759 | 3.343160 |
| H | 0.441277  | -0.166315 | 4.576634 |
| H | 0.969186  | -1.454674 | 5.702628 |
| H | 2.036713  | -0.060460 | 5.378435 |
| O | -1.777630 | 0.611489  | 3.546438 |
| C | -2.602177 | 0.405151  | 4.679446 |
| H | -1.544392 | -0.261347 | 3.182875 |
| H | -3.534039 | -0.127995 | 4.422788 |
| H | -2.080964 | -0.160439 | 5.472122 |
| H | -2.869451 | 1.392833  | 5.080794 |

\*

-----

**B<sup>2</sup>**

CPCM (MeOH)  
M06 SCF (DZ) = -940,635305  
G (1 atm) = -940,373415  
qh-G (1 mol/L) = -940.366041  
qh-G (24.56 mol/L) = -940.363018  
Lowest Frequency = 21.03

HF SCF energy (TZ) = -935.468517  
HF SCF energy (QZ) = -935.526669  
Correlation energy (DZ) = -3.350250  
Correlation energy (TZ) = -4.157441  
DLPNO-CCSD(T1)/CBS = -940.173303

PBE0+D3BJ (ATZ) = -940.551862  
M06-2X (ATZ) = -941.010042  
wB97M-V (ATZ) = -941.072758  
B2GP-PLYP (ATZ) = -940.581115  
B2K-PLYP (ATZ) = -940.464109  
PWPB95 (ATZ) = -940.810085  
PWPB95+D3BJ (ATZ) = -940.832472  
PWPB95+D4 (ATZ) = -940.842162

\*xyz 0 1

|    |           |           |           |
|----|-----------|-----------|-----------|
| Ru | 0.214373  | -0.365967 | 0.082209  |
| O  | 1.376043  | 1.342619  | 0.077095  |
| O  | 2.146656  | -1.242665 | -0.404348 |
| C  | 1.206978  | 2.413165  | 0.797767  |
| O  | 0.913201  | -0.393663 | -1.981526 |
| C  | 2.015410  | -0.912055 | -1.623232 |
| C  | 2.224727  | 3.485672  | 0.481207  |
| O  | 0.339071  | 2.586314  | 1.649421  |
| C  | 3.130223  | -1.095510 | -2.593963 |
| H  | 2.139831  | 3.779555  | -0.576234 |
| H  | 3.242959  | 3.092600  | 0.621551  |
| H  | 2.075570  | 4.365340  | 1.120141  |
| H  | 3.758960  | -1.948191 | -2.307185 |
| H  | 3.757103  | -0.190266 | -2.582337 |
| H  | 2.741481  | -1.227913 | -3.611735 |
| C  | -0.309492 | -1.536549 | 1.832600  |
| C  | 0.650205  | -2.167935 | 2.785462  |
| C  | -0.722793 | -2.237121 | 0.655148  |
| C  | -0.752003 | -0.203137 | 2.008662  |
| H  | 1.362042  | -2.818462 | 2.255434  |
| H  | 1.212294  | -1.408011 | 3.346676  |
| H  | 0.104913  | -2.792777 | 3.511506  |
| C  | -1.513691 | -1.598931 | -0.319036 |
| H  | -0.315899 | -3.231741 | 0.453860  |
| C  | -1.562795 | 0.435977  | 1.025636  |
| H  | -0.370157 | 0.388082  | 2.842804  |
| C  | -1.933207 | -0.237299 | -0.160806 |
| H  | -1.708760 | -2.107579 | -1.268073 |

**B<sup>2</sup>**

CPCM (MeOH)  
wB97X-D3 SCF (DZ) = -941.0299423  
G (1 atm) = -940.757828  
qh G-E (1 mol/L) = 0.280123  
qh G-E (24.56 mol/L) = 0.283146  
Lowest Frequency = 19.75

HF SCF energy (TZ) = -935.469371  
HF SCF energy (QZ) = -935.526746  
Correlation energy (DZ) = -3.350462  
Correlation energy (TZ) = -4.158334  
DLPNO-CCSD(T1)/CBS = -940.174436

PBE0+D3BJ (ATZ) = -940.552845  
M06-2X (ATZ) = -941.030346  
wB97M-V (ATZ) = -941.091302  
B2GP-PLYP (ATZ) = -940.599092  
B2K-PLYP (ATZ) = -940.482673  
PWPB95 (ATZ) = -940.827888  
PWPB95+D3BJ (ATZ) = -940.850396  
PWPB95+D4 (ATZ) = -940.860118

SMD (MeOH)

HF SCF energy (TZ) = -935.481707  
HF SCF energy (QZ) = -935.538799  
Correlation energy (DZ) = -3.350462  
Correlation energy (TZ) = -4.153262  
DLPNO-CCSD(T1)/CBS = -940.178368

\*xyz 0 1

|    |           |           |           |
|----|-----------|-----------|-----------|
| Ru | -0.159670 | -0.465898 | 0.070185  |
| O  | -1.089071 | 1.303978  | -0.441674 |
| C  | -1.197181 | 2.355218  | 0.315303  |
| C  | -1.876669 | 3.518272  | -0.382168 |
| O  | -0.805104 | 2.444508  | 1.478814  |
| C  | 1.685338  | -1.460198 | -0.364682 |
| C  | 0.992142  | -2.236262 | 0.595996  |
| C  | 1.966179  | -0.074842 | -0.168073 |
| C  | 0.496819  | -1.620158 | 1.776293  |
| C  | 2.710750  | 0.711956  | -1.229719 |
| C  | 1.507609  | 0.508028  | 1.042257  |
| C  | -0.364016 | -2.384170 | 2.738408  |
| C  | 0.776268  | -0.238684 | 1.997138  |
| C  | 2.189496  | 2.137987  | -1.407182 |
| C  | 4.209690  | 0.692408  | -0.906045 |
| H  | -1.278249 | 3.822262  | -1.253888 |
| H  | -2.862359 | 3.204980  | -0.755125 |
| H  | -1.988782 | 4.367333  | 0.302341  |
| H  | 1.931336  | -1.912477 | -1.328239 |
| H  | 0.734347  | -3.272065 | 0.371963  |
| H  | 2.557838  | 0.173233  | -2.179809 |

|   |           |           |           |
|---|-----------|-----------|-----------|
| H | -1.756087 | 1.502677  | 1.138391  |
| C | -2.673240 | 0.439215  | -1.287546 |
| C | -2.407693 | 1.932991  | -1.378788 |
| C | -4.164755 | 0.146455  | -1.144161 |
| H | -2.313150 | -0.034410 | -2.221182 |
| H | -2.846715 | 2.476156  | -0.524666 |
| H | -2.867053 | 2.341803  | -2.291829 |
| H | -1.327486 | 2.153472  | -1.408847 |
| H | -4.727578 | 0.582755  | -1.984170 |
| H | -4.368099 | -0.936271 | -1.121337 |
| H | -4.553574 | 0.585235  | -0.208795 |

\*

-----

|   |           |           |           |
|---|-----------|-----------|-----------|
| H | 1.587538  | 1.584378  | 1.189354  |
| H | -0.888890 | -3.205792 | 2.234017  |
| H | 0.272524  | -2.812657 | 3.527730  |
| H | -1.100802 | -1.723236 | 3.213803  |
| H | 0.342744  | 0.271096  | 2.856396  |
| H | 2.695440  | 2.616546  | -2.258729 |
| H | 2.386615  | 2.758311  | -0.518373 |
| H | 1.106013  | 2.143855  | -1.596846 |
| H | 4.590308  | -0.337491 | -0.828475 |
| H | 4.406607  | 1.202263  | 0.051199  |
| H | 4.778861  | 1.210908  | -1.692263 |
| O | -1.172210 | -1.067354 | -1.737409 |
| O | -2.201216 | -1.154664 | 0.169631  |
| C | -2.248929 | -1.272007 | -1.095844 |
| C | -3.527765 | -1.605744 | -1.794963 |
| H | -4.055760 | -2.400232 | -1.252137 |
| H | -4.166242 | -0.709822 | -1.794898 |
| H | -3.335064 | -1.910275 | -2.829839 |

\*

-----

**B<sup>+5</sup>**

CPCM (MeOH)  
M06 SCF (DZ) = -827.752645  
G (1 atm) = -827.483550  
qh-G (1 mol/L) = -827.477717  
qh-G (24.56 mol/L) = -827.474695  
Lowest Frequency = 26.9

HF SCF energy (TZ) = -823.112478  
HF SCF energy (QZ) = -823.162218  
Correlation energy (DZ) = -3.031128  
Correlation energy (TZ) = -3.758015  
DLPNO-CCSD(T1)/CBS = -827.359966

\*xyz 1 1

|    |           |           |           |
|----|-----------|-----------|-----------|
| Ru | -0.282944 | 0.107309  | 0.054845  |
| O  | -0.398289 | -1.700224 | 1.285547  |
| O  | -2.435718 | 0.043577  | 0.156909  |
| C  | -1.022051 | -1.637695 | 2.578310  |
| H  | -0.764050 | -2.449670 | 0.786684  |
| O  | -1.362518 | -1.128488 | -1.315693 |
| C  | -2.478203 | -0.807255 | -0.786188 |
| H  | -0.891829 | -2.598066 | 3.095260  |
| H  | -2.090460 | -1.391759 | 2.487647  |
| H  | -0.506814 | -0.848747 | 3.141090  |
| C  | -3.750519 | -1.432408 | -1.223532 |
| H  | -3.709484 | -1.679274 | -2.291838 |
| H  | -3.889976 | -2.369738 | -0.662504 |
| H  | -4.599345 | -0.772186 | -1.007686 |
| C  | 1.298600  | 0.741056  | -1.255548 |
| C  | 1.896115  | 0.233544  | -0.073692 |
| C  | 0.292323  | 1.747200  | -1.210772 |
| H  | 1.515845  | 0.265306  | -2.215436 |
| C  | 2.901316  | -0.890577 | -0.079446 |
| C  | 1.457495  | 0.790526  | 1.164029  |
| C  | -0.153193 | 2.271275  | 0.031645  |
| H  | -0.218395 | 2.040836  | -2.130738 |
| C  | 4.303657  | -0.290654 | -0.152169 |
| C  | 2.672765  | -1.905901 | -1.187989 |
| H  | 2.792658  | -1.407460 | 0.892655  |
| C  | 0.459887  | 1.784408  | 1.227430  |
| H  | 1.813040  | 0.338357  | 2.095766  |
| C  | -1.307465 | 3.210347  | 0.099247  |
| H  | 5.064897  | -1.084551 | -0.104154 |
| H  | 4.439607  | 0.255187  | -1.101905 |

**B<sup>+5</sup>**

CPCM (MeOH)  
wB97X-D3 SCF (DZ) = -828.127823  
G (1 atm) = -827.851006  
qh G-E (1 mol/L) = 0.285196  
qh G-E (24.56 mol/L) = 0.288219  
Lowest Frequency = 20.03

HF SCF energy (TZ) = -823.113678  
HF SCF energy (QZ) = -823.162529  
Correlation energy (DZ) = -3.032013  
Correlation energy (TZ) = -3.758868  
DLPNO-CCSD(T1)/CBS = -827.360843

\*xyz 1 1

|    |           |           |           |
|----|-----------|-----------|-----------|
| Ru | -0.293098 | 0.108331  | 0.054829  |
| C  | 1.291425  | 0.739160  | -1.244220 |
| C  | 1.881881  | 0.224726  | -0.063243 |
| C  | 0.290254  | 1.751923  | -1.202251 |
| C  | 2.909328  | -0.889707 | -0.074103 |
| C  | 1.436513  | 0.777777  | 1.175058  |
| C  | -0.159889 | 2.270415  | 0.038103  |
| C  | 2.663204  | -1.936673 | -1.159974 |
| C  | 4.308428  | -0.272538 | -0.189672 |
| C  | 0.440517  | 1.773254  | 1.237091  |
| C  | -1.295547 | 3.244575  | 0.105308  |
| H  | 1.519451  | 0.277915  | -2.206403 |
| H  | -0.203284 | 2.058039  | -2.125363 |
| H  | 2.832010  | -1.388790 | 0.906012  |
| H  | 1.790830  | 0.331924  | 2.107333  |
| H  | 2.790843  | -1.517263 | -2.170352 |
| H  | 1.651750  | -2.365632 | -1.088687 |
| H  | 3.388586  | -2.756262 | -1.052736 |
| H  | 4.490433  | 0.463565  | 0.608044  |
| H  | 4.428335  | 0.236807  | -1.159690 |
| H  | 5.078001  | -1.055069 | -0.115523 |
| H  | 0.062262  | 2.098101  | 2.207258  |
| H  | -1.888043 | 3.091718  | 1.016827  |
| H  | -0.885322 | 4.265699  | 0.129950  |
| H  | -1.948885 | 3.154137  | -0.771889 |
| O  | -0.410578 | -1.677510 | 1.273559  |
| C  | -1.038747 | -1.646549 | 2.571009  |
| H  | -0.748418 | -2.437424 | 0.773362  |
| H  | -0.910373 | -2.624063 | 3.053455  |
| H  | -2.105255 | -1.399923 | 2.476522  |

|   |           |           |           |
|---|-----------|-----------|-----------|
| H | 4.489189  | 0.413598  | 0.674458  |
| H | 2.869449  | -1.474734 | -2.184172 |
| H | 1.643288  | -2.302269 | -1.179347 |
| H | 3.363632  | -2.753678 | -1.064886 |
| H | 0.073314  | 2.103242  | 2.198496  |
| H | -0.937652 | 4.248332  | 0.105277  |
| H | -1.889190 | 3.054267  | 1.018969  |
| H | -1.970348 | 3.089276  | -0.768894 |

\*

|   |           |           |           |
|---|-----------|-----------|-----------|
| H | -0.521634 | -0.874886 | 3.152542  |
| O | -2.431646 | 0.054937  | 0.138631  |
| O | -1.351840 | -1.119200 | -1.320328 |
| C | -2.472730 | -0.805310 | -0.797277 |
| C | -3.744028 | -1.452669 | -1.226161 |
| H | -3.708550 | -1.685498 | -2.297062 |
| H | -3.847610 | -2.396429 | -0.669340 |
| H | -4.599940 | -0.809297 | -0.992941 |

\*

**B<sup>+</sup>**

CPCM (MeOH)  
M06 SCF (DZ) = -712.059019  
G (1 atm) = -711.839522  
qh-G (1 mol/L) = -711.833928  
qh-G (24.56 mol/L) = -711.830906  
Lowest Frequency = 31.68

HF SCF energy (TZ) = -707.989428  
HF SCF energy (QZ) = -708.030943  
Correlation energy (DZ) = -2.640219  
Correlation energy (TZ) = -3.277254  
DLPNO-CCSD(T1)/CBS = -711.692947

\*xyz 1 1

|    |           |           |           |
|----|-----------|-----------|-----------|
| C  | 1.856771  | 0.185481  | 0.195250  |
| C  | 2.948108  | -0.843480 | 0.353594  |
| C  | 1.195670  | 0.703063  | 1.334720  |
| C  | 2.794588  | -2.041713 | -0.573771 |
| C  | 4.294483  | -0.150383 | 0.152609  |
| H  | 2.892728  | -1.203547 | 1.396480  |
| C  | 1.419156  | 0.605468  | -1.094947 |
| C  | 0.073211  | 1.556501  | 1.191583  |
| H  | 1.464230  | 0.329623  | 2.325669  |
| H  | 1.819224  | -2.541260 | -0.450812 |
| H  | 2.909516  | -1.761251 | -1.634003 |
| H  | 3.579513  | -2.780553 | -0.351109 |
| H  | 4.423892  | 0.696257  | 0.844681  |
| H  | 4.387929  | 0.232173  | -0.878186 |
| H  | 5.115427  | -0.863508 | 0.323711  |
| C  | 0.321200  | 1.477178  | -1.236940 |
| H  | 1.856632  | 0.159337  | -1.990738 |
| C  | -0.395280 | 1.960011  | -0.097560 |
| H  | -0.516238 | 1.820745  | 2.073867  |
| H  | -0.075706 | 1.678870  | -2.235402 |
| C  | -1.642883 | 2.760081  | -0.250281 |
| H  | -2.337937 | 2.568926  | 0.580356  |
| H  | -1.398027 | 3.834478  | -0.245354 |
| H  | -2.145497 | 2.530934  | -1.200622 |
| C  | -2.648247 | -1.067651 | 0.046264  |
| C  | -3.975729 | -1.724213 | 0.051923  |
| O  | -1.984039 | -0.875951 | 1.116926  |
| O  | -2.094645 | -0.686820 | -1.037491 |
| H  | -4.438172 | -1.657271 | 1.043755  |
| H  | -3.840648 | -2.786707 | -0.203315 |
| H  | -4.622926 | -1.276066 | -0.712936 |
| Ru | -0.315699 | -0.159115 | 0.005541  |

\*

**B<sup>+</sup>**

CPCM (MeOH)  
wB97X-D3 SCF (DZ) = -712.379781  
G (1 atm) = -712.153891  
qh G-E (1 mol/L) = 0.232811  
qh G-E (24.56 mol/L) = 0.235833  
Lowest Frequency = 26.5

HF SCF energy (TZ) = -707.992095  
HF SCF energy (QZ) = -708.032931  
Correlation energy (DZ) = -2.642375  
Correlation energy (TZ) = -3.278904  
DLPNO-CCSD(T1)/CBS = -711.696086

\* xyz 1 1

|    |           |           |           |
|----|-----------|-----------|-----------|
| Ru | -0.364091 | 0.011551  | 0.009573  |
| C  | 0.075120  | 1.706566  | 1.221705  |
| C  | 1.149061  | 0.798491  | 1.373787  |
| C  | -0.353026 | 2.140698  | -0.071181 |
| C  | 1.795467  | 0.255410  | 0.238088  |
| C  | -1.540769 | 3.039417  | -0.229428 |
| C  | 0.357645  | 1.645234  | -1.207331 |
| C  | 2.834129  | -0.840043 | 0.386913  |
| C  | 1.398054  | 0.712151  | -1.056763 |
| C  | 2.473528  | -2.098366 | -0.407506 |
| C  | 4.206709  | -0.282143 | -0.005717 |
| H  | -0.507165 | 1.998850  | 2.097602  |
| H  | 1.386772  | 0.409524  | 2.365020  |
| H  | -2.260697 | 2.889206  | 0.585548  |
| H  | -1.195718 | 4.084394  | -0.197512 |
| H  | -2.038532 | 2.870785  | -1.192700 |
| H  | -0.001934 | 1.887414  | -2.208980 |
| H  | 2.859983  | -1.106759 | 1.454971  |
| H  | 1.829144  | 0.256031  | -1.949078 |
| H  | 2.435352  | -1.907061 | -1.491196 |
| H  | 1.500963  | -2.508786 | -0.089907 |
| H  | 3.233048  | -2.874399 | -0.233537 |
| H  | 4.462017  | 0.606340  | 0.590943  |
| H  | 4.232540  | -0.002699 | -1.071015 |
| H  | 4.980747  | -1.044650 | 0.164351  |
| O  | -2.009465 | -0.691885 | -1.063205 |
| O  | -1.878685 | -0.965904 | 1.080789  |
| C  | -2.502407 | -1.221097 | -0.005611 |
| C  | -3.698576 | -2.098548 | -0.045746 |
| H  | -4.417407 | -1.716564 | -0.780572 |
| H  | -3.371751 | -3.097549 | -0.372149 |
| H  | -4.150664 | -2.174139 | 0.948928  |

\*

**C<sup>1</sup>**

CPCM (MeOH)  
M06 SCF (DZ) = -1728.818310  
G (1 atm) = -1728.412044

**C<sup>1</sup>**

CPCM (•)  
wB97X-D3 SCF (DZ) = -1729.467635  
G (1 atm) = -1729.049089

qh-G (1 mol/L) = -1728.403452  
qh-G (24.56 mol/L) = -1728.400429  
Lowest Frequency = 27.97

HF SCF energy (TZ) = -1720.997419  
HF SCF energy (QZ) = -1721.076143  
Correlation energy (DZ) = -4.857403  
Correlation energy (TZ) = -5.963957  
DLPNO-CCSD(T1)/CBS = -1727.710420

\*xyz 0 1

|    |           |           |           |
|----|-----------|-----------|-----------|
| Ru | 0.636253  | 0.047423  | -0.212816 |
| N  | -1.450700 | 0.792678  | 0.004808  |
| O  | 0.193609  | -0.578618 | 1.741197  |
| C  | -2.578685 | 0.167408  | 0.086345  |
| C  | -1.596782 | 2.220973  | 0.065173  |
| Cl | 1.390545  | 2.087102  | 0.929026  |
| C  | 1.020132  | -1.136202 | 2.571135  |
| C  | -2.884189 | -1.263074 | 0.085041  |
| H  | -3.484045 | 0.799209  | 0.106456  |
| C  | -1.318979 | 3.004861  | -1.052541 |
| C  | -2.024718 | 2.814736  | 1.251527  |
| C  | 0.367681  | -1.469408 | 3.895514  |
| O  | 2.202634  | -1.394032 | 2.358634  |
| C  | -2.058429 | -2.272109 | 0.601298  |
| C  | -4.129391 | -1.612323 | -0.465538 |
| C  | -1.465593 | 4.386230  | -0.978384 |
| H  | -0.986847 | 2.529666  | -1.978523 |
| C  | -2.157800 | 4.199295  | 1.323142  |
| H  | -2.223341 | 2.183299  | 2.122491  |
| H  | 0.005159  | -0.548967 | 4.377934  |
| H  | -0.512319 | -2.111461 | 3.731342  |
| H  | 1.076277  | -1.977568 | 4.562209  |
| C  | -2.459774 | -3.601424 | 0.525223  |
| H  | -1.121649 | -1.991595 | 1.086231  |
| C  | -4.512994 | -2.944146 | -0.563215 |
| H  | -4.792504 | 0.825015  | -0.836989 |
| C  | -1.877112 | 4.988740  | 0.210396  |
| H  | -1.254989 | 4.997797  | -1.859230 |
| H  | -2.481688 | 4.662382  | 2.258543  |
| C  | -3.674638 | -3.942457 | -0.069501 |
| H  | -1.817736 | -4.382299 | 0.940421  |
| H  | -5.473789 | -3.203499 | -1.013350 |
| H  | -1.980586 | 6.074979  | 0.267266  |
| H  | -3.977506 | -4.990619 | -0.132182 |
| C  | 1.682513  | -1.779202 | -0.716915 |
| C  | 0.455281  | -1.778207 | -1.425240 |
| C  | 2.622242  | -0.719361 | -0.835958 |
| H  | 1.893145  | -2.582841 | -0.005390 |
| C  | 0.102852  | -0.670579 | -2.241432 |
| H  | -0.255480 | -2.596958 | -1.295330 |
| C  | 3.976022  | -0.836642 | -0.182366 |
| C  | 2.235534  | 0.389765  | -1.639193 |
| C  | -1.203285 | -0.639204 | -2.962632 |
| C  | 1.009952  | 0.421002  | -2.340948 |
| C  | 4.633526  | 0.495355  | 0.135046  |
| C  | 4.867360  | -1.676730 | -1.097059 |
| H  | 3.809773  | -1.380660 | 0.761274  |
| H  | 2.863329  | 1.283960  | -1.648968 |
| H  | -1.616782 | 0.378807  | -3.017339 |
| H  | -1.048453 | -0.986808 | -3.997215 |
| H  | -1.943837 | -1.303798 | -2.494616 |
| H  | 0.733994  | 1.308752  | -2.914869 |
| H  | 5.568255  | 0.326342  | 0.692671  |
| H  | 4.905175  | 1.044435  | -0.784188 |
| H  | 3.974661  | 1.139474  | 0.738359  |

qh G-E (1 mol/L) = 0.430843  
qh G-E (24.56 mol/L) = 0.433865  
Lowest Frequency = 6.17

HF SCF energy (TZ) = -1721.003333  
HF SCF energy (QZ) = -1721.080680  
Correlation energy (DZ) = -4.861072  
Correlation energy (TZ) = -5.968019  
DLPNO-CCSD(T1)/CBS = -1727.718833

SMD (MeOH)

HF SCF energy (TZ) = -1721.017284  
HF SCF energy (QZ) = -1721.094556  
Correlation energy (DZ) = -4.858180  
Correlation energy (TZ) = -5.965578  
DLPNO-CCSD(T1)/CBS = -1727.730510

\* xyz 0 1

|    |           |           |           |
|----|-----------|-----------|-----------|
| Ru | -0.491575 | -0.272451 | -0.150400 |
| O  | 0.649009  | -1.856105 | 0.561571  |
| C  | 1.127647  | -2.866717 | -0.092924 |
| C  | 1.925272  | -3.811496 | 0.787482  |
| O  | 0.996508  | -3.083379 | -1.300071 |
| C  | -1.585365 | -1.591739 | -1.469457 |
| C  | -0.661763 | -0.830887 | -2.246018 |
| C  | -2.510973 | -0.975806 | -0.603229 |
| C  | -0.664602 | 0.579240  | -2.184704 |
| C  | -3.470405 | -1.756980 | 0.271287  |
| C  | -2.491574 | 0.457612  | -0.542970 |
| C  | 0.307825  | 1.389971  | -2.988982 |
| C  | -1.610657 | 1.221120  | -1.328193 |
| C  | -2.955018 | -3.145117 | 0.647390  |
| C  | -4.836105 | -1.829973 | -0.422929 |
| H  | 2.807956  | -3.280682 | 1.174854  |
| H  | 1.322103  | -4.123303 | 1.652227  |
| H  | 2.247909  | -4.691839 | 0.218531  |
| H  | -1.474964 | -2.674685 | -1.470293 |
| H  | 0.097506  | -1.352484 | -2.824570 |
| H  | -3.584398 | -1.172077 | 1.198772  |
| H  | -3.123995 | 0.968027  | 0.186352  |
| H  | 1.181310  | 0.792785  | -3.280032 |
| H  | -0.193955 | 1.734550  | -3.906256 |
| H  | 0.642707  | 2.278839  | -2.438882 |
| H  | -1.605108 | 2.306149  | -1.232047 |
| H  | -1.946455 | -3.091716 | 1.084879  |
| H  | -2.918331 | -3.816259 | -0.225666 |
| H  | -3.628067 | -3.604207 | 1.386334  |
| H  | -5.226807 | -0.826149 | -0.649792 |
| H  | -4.762581 | -2.388727 | -1.370126 |
| H  | -5.566126 | -2.342873 | 0.221212  |
| N  | 1.339625  | 0.885676  | 0.242743  |
| C  | 1.520172  | 2.154256  | 0.356332  |
| C  | 2.565374  | 0.127170  | 0.340666  |
| C  | 0.505385  | 3.225765  | 0.335269  |
| C  | 3.207410  | 0.018520  | 1.572840  |
| C  | 3.105234  | -0.473554 | -0.795131 |
| C  | 0.787720  | 4.344609  | -0.461086 |
| C  | -0.670518 | 3.192815  | 1.093747  |
| C  | 4.401504  | -0.697021 | 1.667086  |
| C  | 4.300629  | -1.180690 | -0.694630 |
| C  | -0.131104 | 5.386664  | -0.557667 |
| C  | -1.572090 | 4.251948  | 1.016844  |
| C  | 4.952148  | -1.296223 | 0.535040  |
| C  | -1.314076 | 5.339822  | 0.181085  |
| H  | 2.558253  | 2.508706  | 0.439824  |
| H  | 2.761055  | 0.483536  | 2.454512  |

|   |          |           |           |
|---|----------|-----------|-----------|
| H | 4.433964 | -2.670805 | -1.294301 |
| H | 5.015010 | -1.172741 | -2.068881 |
| H | 5.859011 | -1.822123 | -0.639195 |

\*

-----

|    |           |           |           |
|----|-----------|-----------|-----------|
| H  | 2.584198  | -0.394528 | -1.749969 |
| H  | 1.724208  | 4.386906  | -1.023372 |
| H  | -0.875241 | 2.334442  | 1.735476  |
| H  | 4.901203  | -0.784589 | 2.634222  |
| H  | 4.724658  | -1.647239 | -1.586241 |
| H  | 0.083789  | 6.241909  | -1.201437 |
| H  | -2.488059 | 4.223779  | 1.610729  |
| H  | 5.886766  | -1.856057 | 0.609160  |
| H  | -2.031605 | 6.160601  | 0.114156  |
| Cl | -0.943294 | -0.066027 | 2.273529  |

\*

-----  
**C<sup>1</sup>.S**

CPCM (\*)

|                        |              |
|------------------------|--------------|
| wB97X-D3 SCF (DZ) =    | -1845.178202 |
| G (1 atm) =            | -1844.709891 |
| qh G-E (1 mol/L) =     | 0.482187     |
| qh G-E (24.56 mol/L) = | 0.485210     |
| Lowest Frequency =     | 24.22        |

SMD (MeOH)

|                           |              |
|---------------------------|--------------|
| HF SCF energy (TZ) =      | -1836.108217 |
| HF SCF energy (QZ) =      | -1836.193420 |
| Correlation energy (DZ) = | -5.237851    |
| Correlation energy (TZ) = | -6.437681    |
| DLPNO-CCSD(T1)/CBS =      | -1843.357878 |

\* xyz 0 1

|    |           |           |           |
|----|-----------|-----------|-----------|
| Ru | -0.424199 | 0.699243  | 0.675256  |
| C  | 1.955395  | -1.963114 | 0.064484  |
| C  | -0.223217 | 2.445225  | 2.000889  |
| C  | 1.673482  | 1.246731  | 0.965771  |
| H  | 1.159531  | 1.187377  | 3.081067  |
| O  | -0.550974 | -0.416729 | 3.829049  |
| N  | -0.742456 | -0.678261 | -1.019670 |
| Cl | -2.863875 | 0.620591  | 1.106221  |
| O  | -0.459260 | -1.126321 | 1.689594  |
| C  | 1.424810  | -1.910449 | -1.230244 |
| C  | 3.297236  | -2.287728 | 0.249507  |
| C  | 0.915750  | 1.621920  | 2.112496  |
| H  | 1.301821  | -1.762373 | 0.913167  |
| C  | -1.037414 | 2.828929  | 3.200657  |
| C  | -0.607454 | 2.858945  | 0.686195  |
| C  | 1.312891  | 1.700771  | -0.324476 |
| H  | 2.528631  | 0.579563  | 1.079081  |
| C  | -0.539450 | -1.302486 | 2.973112  |
| C  | -2.040406 | -0.622882 | -1.650443 |
| C  | 0.035379  | -1.552329 | -1.559575 |
| H  | -3.236732 | 2.286787  | -0.324153 |
| C  | 2.241725  | -2.231000 | -2.326488 |
| C  | 4.118764  | -2.552670 | -0.847263 |
| H  | 3.704936  | -2.332772 | 1.261755  |
| H  | -0.958540 | 2.054147  | 3.973112  |
| H  | -0.666237 | 3.782712  | 3.606169  |
| H  | -2.093193 | 2.956299  | 2.927030  |
| C  | 0.139941  | 2.504137  | -0.451427 |
| H  | -1.550728 | 3.389984  | 0.543337  |
| C  | 2.216019  | 1.391151  | -1.502920 |
| C  | -0.619927 | -2.768765 | 3.359900  |
| C  | -2.425666 | 0.518043  | -2.350683 |
| C  | -2.898838 | -1.718828 | -1.558604 |
| H  | -0.354682 | -2.077835 | -2.443712 |
| C  | 3.588156  | -2.528426 | -2.138084 |
| H  | 1.820215  | -2.222102 | -3.335028 |
| H  | 5.172984  | -2.794813 | -0.694872 |
| H  | -0.213757 | 2.815341  | -1.433609 |

|   |           |           |           |
|---|-----------|-----------|-----------|
| C | 1.524657  | 1.403920  | -2.864418 |
| C | 3.370514  | 2.405342  | -1.472295 |
| H | 2.643412  | 0.391966  | -1.329988 |
| H | -1.524502 | -3.216424 | 2.922532  |
| H | 0.245206  | -3.312078 | 2.951569  |
| H | -0.645570 | -2.880299 | 4.450577  |
| C | -3.676639 | 0.560285  | -2.961854 |
| H | -1.753698 | 1.373742  | -2.410923 |
| C | -4.152031 | -1.667466 | -2.167340 |
| H | -2.589475 | -2.599167 | -0.990743 |
| H | 4.222162  | -2.751260 | -2.998506 |
| H | 2.234527  | 1.077491  | -3.638540 |
| H | 1.182982  | 2.415245  | -3.136471 |
| H | 0.656645  | 0.731118  | -2.897704 |
| H | 3.925111  | 2.356985  | -0.523365 |
| H | 2.991698  | 3.432681  | -1.597532 |
| H | 4.074008  | 2.197676  | -2.292325 |
| C | -4.544940 | -0.528329 | -2.870030 |
| H | -3.974421 | 1.456693  | -3.509617 |
| H | -4.825484 | -2.523468 | -2.086108 |
| H | -5.527833 | -0.487541 | -3.344247 |
| C | -4.755042 | 3.403843  | -0.761922 |
| H | -4.919303 | 4.381128  | -1.238915 |
| H | -5.334453 | 2.647119  | -1.322447 |
| H | -5.154449 | 3.451824  | 0.267349  |
| O | -3.367925 | 3.135089  | -0.787699 |

\*

-----  
**C<sup>1</sup>•S<sub>2</sub><sup>k</sup>**

CPCM (•)

|                        |              |
|------------------------|--------------|
| wB97X-D3 SCF (DZ) =    | -1960.885805 |
| G (1 atm) =            | -1960.370133 |
| qh G-E (1 mol/L) =     | 0.532066     |
| qh G-E (24.56 mol/L) = | 0.535089     |
| Lowest Frequency =     | 15.12        |

SMD (MeOH)

|                           |              |
|---------------------------|--------------|
| HF SCF energy (TZ) =      | -1951.195822 |
| HF SCF energy (QZ) =      | -1951.288869 |
| Correlation energy (DZ) = | -5.618718    |
| Correlation energy (TZ) = | -6.909659    |
| DLPNO-CCSD(T1)/CBS =      | -1958.980907 |

\* xyz 0 1

|    |           |           |           |
|----|-----------|-----------|-----------|
| Ru | -0.557464 | 0.823896  | 0.730230  |
| C  | 1.195944  | 0.994842  | 2.016669  |
| C  | 1.642302  | 1.046063  | 0.686886  |
| C  | 0.185955  | 1.896722  | 2.482855  |
| H  | 1.559780  | 0.206890  | 2.673718  |
| C  | 0.085141  | 2.840015  | 0.188963  |
| C  | -0.346893 | 2.810607  | 1.552076  |
| C  | 1.096719  | 1.969296  | -0.258910 |
| C  | 1.833312  | -2.124346 | 0.272611  |
| O  | 0.153079  | -1.703902 | 2.913779  |
| Cl | -2.910190 | 1.521111  | 0.353121  |
| N  | -0.801505 | -0.730423 | -0.842059 |
| O  | -1.546152 | -0.631508 | 1.892065  |
| H  | 2.398092  | 0.337325  | 0.353656  |
| C  | -0.330238 | 1.817221  | 3.889960  |
| H  | -0.429937 | 3.495998  | -0.515540 |
| H  | -1.188131 | 3.437019  | 1.850134  |
| C  | 1.688688  | 2.043250  | -1.655095 |
| C  | 1.460474  | -1.737905 | -1.018204 |
| C  | 3.177012  | -2.359125 | 0.559923  |
| H  | 1.083051  | -2.211962 | 1.060795  |
| C  | -1.045523 | -1.537753 | 2.678763  |



|   |           |           |           |
|---|-----------|-----------|-----------|
| H | -2.881551 | 0.237252  | 2.885702  |
| H | -2.435171 | 2.714128  | -1.396454 |
| C | -2.135066 | -0.905433 | -1.381914 |
| C | 0.044191  | -1.533979 | -1.381127 |
| H | -0.160165 | 0.815276  | 4.305639  |
| H | 0.204382  | 2.545848  | 4.518075  |
| H | -1.405620 | 2.034150  | 3.930304  |
| C | 0.670321  | 1.988899  | -2.790540 |
| C | 2.552723  | 3.310047  | -1.730282 |
| H | 2.358465  | 1.174352  | -1.754768 |
| C | 2.427515  | -1.626404 | -2.025140 |
| C | 4.147598  | -2.200032 | -0.430003 |
| H | 3.466915  | -2.658416 | 1.569520  |
| C | -2.099266 | -2.411617 | 3.330722  |
| O | -3.412524 | 0.595060  | 3.624091  |
| O | -2.265956 | 3.354196  | -2.114412 |
| C | -2.584136 | -0.109963 | -2.433892 |
| C | -2.950071 | -1.897410 | -0.841952 |
| H | -0.313015 | -2.156152 | -2.215988 |
| H | 1.184019  | 2.131414  | -3.753208 |
| H | -0.107875 | 2.760731  | -2.697031 |
| H | 0.170355  | 1.011024  | -2.821157 |
| H | 3.285383  | 3.345870  | -0.909460 |
| H | 1.926644  | 4.215055  | -1.670411 |
| H | 3.102799  | 3.337060  | -2.682758 |
| C | 3.771840  | -1.832608 | -1.723576 |
| H | 2.127370  | -1.355411 | -3.040790 |
| H | 5.200564  | -2.372806 | -0.196499 |
| H | -2.729404 | -1.780374 | 3.974270  |
| H | -2.750208 | -2.855033 | 2.563460  |
| H | -1.629228 | -3.201664 | 3.927931  |
| C | -4.774586 | 0.443752  | 3.284114  |
| C | -3.510911 | 3.937171  | -2.444518 |
| C | -3.862490 | -0.313976 | -2.948604 |
| H | -1.951336 | 0.686652  | -2.826155 |
| C | -4.232251 | -2.089064 | -1.356424 |
| H | -2.578898 | -2.504382 | -0.014604 |
| H | 4.527224  | -1.716699 | -2.503410 |
| H | -5.378032 | 0.863701  | 4.102868  |
| H | -5.059464 | -0.618728 | 3.165057  |
| H | -5.034431 | 0.975600  | 2.351803  |
| H | -3.975160 | 4.447918  | -1.581704 |
| H | -4.229230 | 3.191520  | -2.831502 |
| H | -3.336649 | 4.684638  | -3.231981 |
| C | -4.691673 | -1.299577 | -2.410330 |
| H | -4.213912 | 0.308860  | -3.774203 |
| H | -4.872375 | -2.865306 | -0.931202 |
| H | -5.695091 | -1.452442 | -2.813503 |

\*

-----  
**C<sup>1</sup>•S<sub>3</sub><sup>k</sup>**

CPCM (•)

wB97X-D3 SCF (DZ) = -2076.597612

G (1 atm) = -2076.032783

qh G-E (1 mol/L) = 0.583262

qh G-E (24.56 mol/L) = 0.586285

Lowest Frequency = 6.17

SMD (MeOH)

HF SCF energy (TZ) = -2066.290698

HF SCF energy (QZ) = -2066.392366

Correlation energy (DZ) = -6.001391

Correlation energy (TZ) = -7.385115

DLPNO-CCSD(T1)/CBS = -2074.616675

\* xyz 0 1

|    |           |           |           |
|----|-----------|-----------|-----------|
| Ru | -0.611784 | 0.719781  | 0.682513  |
| C  | 1.177297  | 0.506031  | 1.931660  |
| C  | 1.584422  | 0.922692  | 0.646369  |
| C  | 0.199330  | 1.255304  | 2.649274  |
| H  | 1.579948  | -0.411609 | 2.358026  |
| C  | -0.352496 | 2.397589  | 2.023718  |
| C  | 0.050341  | 2.779379  | 0.711823  |
| C  | 1.030090  | 2.058299  | -0.005732 |
| Cl | -2.690235 | 1.723849  | -0.203572 |
| C  | 1.936294  | -2.188397 | 0.126255  |
| N  | -0.760776 | -0.868084 | -0.904868 |
| O  | -0.654336 | -2.256508 | 2.125252  |
| O  | -1.988280 | -0.502205 | 1.681194  |
| H  | 2.317592  | 0.326458  | 0.107549  |
| C  | -0.289039 | 0.809592  | 3.994753  |
| H  | -1.161873 | 2.939237  | 2.513634  |
| H  | -0.478093 | 3.601650  | 0.227695  |
| C  | 1.504103  | 2.465197  | -1.388245 |
| H  | -2.595710 | 2.494216  | -2.311309 |
| H  | -4.770358 | 0.916988  | -0.071187 |
| H  | -3.146258 | 0.595051  | 2.618240  |
| C  | 1.577130  | -1.659922 | -1.118429 |
| C  | 3.285588  | -2.326247 | 0.448417  |
| H  | 1.151116  | -2.453607 | 0.839320  |
| C  | -2.079226 | -1.250278 | -1.379389 |
| C  | 0.149077  | -1.570449 | -1.480006 |
| C  | -1.731547 | -1.664663 | 2.205494  |
| H  | -1.362260 | 1.015335  | 4.106618  |
| H  | 0.261154  | 1.363120  | 4.771094  |
| H  | -0.107472 | -0.262885 | 4.140794  |
| C  | 0.360901  | 2.672418  | -2.380316 |
| C  | 2.394143  | 3.707880  | -1.270691 |
| H  | 2.126241  | 1.633823  | -1.758505 |
| O  | -2.837628 | 2.676738  | -3.235724 |
| O  | -5.717480 | 0.739867  | 0.061240  |
| O  | -3.642725 | 0.965239  | 3.375588  |
| C  | 2.558822  | -1.313198 | -2.052513 |
| C  | 4.268791  | -1.933261 | -0.461365 |
| H  | 3.570747  | -2.732138 | 1.421407  |
| C  | -2.719616 | -0.553493 | -2.401220 |
| C  | -2.654569 | -2.399744 | -0.837441 |
| H  | -0.163054 | -2.225466 | -2.307709 |
| C  | -2.915577 | -2.272505 | 2.928553  |
| H  | 0.762924  | 2.942403  | -3.368170 |
| H  | -0.317520 | 3.481116  | -2.065963 |
| H  | -0.233123 | 1.753489  | -2.490273 |
| H  | 3.225673  | 3.538894  | -0.569559 |
| H  | 1.813383  | 4.572877  | -0.910733 |
| H  | 2.819545  | 3.968229  | -2.251514 |
| C  | -4.247295 | 2.799068  | -3.257816 |
| C  | -5.822533 | -0.410401 | 0.878790  |
| C  | -4.280094 | 2.166097  | 2.985882  |
| C  | 3.905254  | -1.428245 | -1.711560 |
| H  | 2.268046  | -0.928647 | -3.033166 |
| H  | 5.324742  | -2.028851 | -0.199099 |
| C  | -3.949972 | -1.011827 | -2.871200 |
| H  | -2.278148 | 0.348652  | -2.824155 |
| C  | -3.886404 | -2.848983 | -1.310916 |
| H  | -2.121915 | -2.944511 | -0.055448 |
| H  | -3.690474 | -2.525843 | 2.188669  |
| H  | -3.352330 | -1.541337 | 3.622797  |
| H  | -2.614073 | -3.180259 | 3.464183  |
| H  | -4.591682 | 3.740553  | -2.791071 |
| H  | -4.748236 | 1.959423  | -2.743156 |
| H  | -4.571666 | 2.800292  | -4.308975 |
| H  | -6.885073 | -0.550393 | 1.127589  |

|   |           |           |           |
|---|-----------|-----------|-----------|
| H | -5.467824 | -1.321394 | 0.364117  |
| H | -5.258628 | -0.305022 | 1.822421  |
| H | -4.909853 | 2.029755  | 2.090418  |
| H | -3.557749 | 2.975731  | 2.774426  |
| H | -4.921022 | 2.491113  | 3.819061  |
| H | 4.673799  | -1.129064 | -2.427125 |
| C | -4.539438 | -2.153874 | -2.328239 |
| H | -4.450604 | -0.467440 | -3.674844 |
| H | -4.330884 | -3.750654 | -0.883816 |
| H | -5.504268 | -2.503720 | -2.701510 |

\*

-----

### C<sup>2</sup>

CPCM (MeOH)  
M06 SCF (DZ) = -1496.983119  
G (1 atm) = -1496.530667  
qh-G (1 mol/L) = -1496.521466  
qh-G (24.56 mol/L) = -1496.518444  
Lowest Frequency = 25.86

HF SCF energy (TZ) = -1488.763330  
HF SCF energy (QZ) = -1488.854520  
Correlation energy (DZ) = -5.389370  
Correlation energy (TZ) = -6.596748  
DLPNO-CCSD(T1)/CBS = -1496.184258

### \*xyz 0 1

|    |           |           |           |
|----|-----------|-----------|-----------|
| Ru | 0.320991  | -0.469503 | -0.242077 |
| N  | -0.957556 | 1.327198  | -0.016557 |
| O  | -0.287920 | -0.651802 | 1.769634  |
| C  | -2.234328 | 1.461275  | 0.119920  |
| C  | -0.257005 | 2.582483  | 0.015037  |
| O  | 1.722639  | 0.745385  | 0.726763  |
| C  | 0.126244  | -1.542643 | 2.615185  |
| C  | -3.290326 | 0.450146  | 0.160087  |
| H  | -2.618366 | 2.495962  | 0.157273  |
| C  | 0.329244  | 3.084153  | -1.143644 |
| C  | -0.200543 | 3.308869  | 1.204938  |
| C  | 2.715386  | 1.377141  | 0.182431  |
| C  | -0.527649 | -1.396229 | 3.973232  |
| O  | 0.945598  | -2.433040 | 2.395259  |
| C  | -3.157929 | -0.828812 | 0.718018  |
| C  | -4.523003 | 0.834878  | -0.393011 |
| C  | 0.962921  | 4.323133  | -1.113094 |
| H  | 0.281414  | 2.501192  | -2.066331 |
| C  | 0.444079  | 4.542821  | 1.231313  |
| H  | -0.654439 | 2.888459  | 2.107225  |
| C  | 3.526657  | 2.153561  | 1.197443  |
| O  | 3.016379  | 1.388602  | -1.011347 |
| H  | -0.322063 | -0.397151 | 4.386611  |
| H  | -1.621596 | -1.480488 | 3.872521  |
| H  | -0.163341 | -2.164007 | 4.668060  |
| C  | -4.228514 | -1.715844 | 0.673574  |
| H  | -2.218332 | -1.098341 | 1.204929  |
| C  | -5.579615 | -0.065176 | -0.459697 |
| H  | -4.639988 | 1.846074  | -0.794803 |
| C  | 1.025836  | 5.054247  | 0.072189  |
| H  | 1.412914  | 4.719365  | -2.026737 |
| H  | 0.489977  | 5.108034  | 2.165707  |
| H  | 3.933206  | 1.466817  | 1.956897  |
| H  | 2.874934  | 2.868657  | 1.724143  |
| H  | 4.350218  | 2.692295  | 0.710328  |
| C  | -5.430545 | -1.346217 | 0.070129  |
| H  | -4.124692 | -2.708639 | 1.118770  |
| H  | -6.525679 | 0.236507  | -0.914739 |

### C<sup>2</sup>

CPCM (MeOH)  
wB97X-D3 SCF (DZ) = -1497.681977  
G (1 atm) = -1488.855528  
qh G-E (1 mol/L) = 0.479444  
qh G-E (24.56 mol/L) = 0.482467  
Lowest Frequency = 18.67

HF SCF energy (TZ) = -1488.765614  
HF SCF energy (QZ) = -1721.080680  
Correlation energy (DZ) = -5.389729  
Correlation energy (TZ) = -6.596892  
DLPNO-CCSD(T1)/CBS = -1496.184899

### SMD (MeOH)

HF SCF energy (TZ) = -1488.787156  
HF SCF energy (QZ) = -1488.876681  
Correlation energy (DZ) = -5.383091  
Correlation energy (TZ) = -6.591581  
DLPNO-CCSD(T1)/CBS = -1496.201400

### \* xyz 0 1

|    |           |           |           |
|----|-----------|-----------|-----------|
| Ru | 0.136219  | -0.758217 | 0.020059  |
| C  | 2.048087  | -1.250239 | 0.993316  |
| C  | 1.253531  | -0.453492 | 1.852451  |
| C  | 1.513771  | -2.430096 | 0.416686  |
| C  | -0.064887 | -0.824382 | 2.231036  |
| C  | 2.323064  | -3.228499 | -0.561704 |
| C  | 0.180694  | -2.801294 | 0.742255  |
| C  | -0.902678 | -0.030845 | 3.217045  |
| C  | -0.583663 | -2.003074 | 1.632768  |
| C  | -0.333604 | 1.353592  | 3.523891  |
| C  | -1.064663 | -0.842355 | 4.509358  |
| H  | 3.047944  | -0.917978 | 0.718431  |
| H  | 1.663638  | 0.498633  | 2.190867  |
| H  | 3.053644  | -2.590374 | -1.076381 |
| H  | 2.872735  | -4.010837 | -0.016120 |
| H  | 1.671288  | -3.700726 | -1.305652 |
| H  | -0.278503 | -3.658500 | 0.252226  |
| H  | -1.894058 | 0.076049  | 2.749603  |
| H  | -1.635511 | -2.241548 | 1.786483  |
| H  | -0.132209 | 1.935862  | 2.611746  |
| H  | 0.608332  | 1.284731  | 4.091572  |
| H  | -1.047382 | 1.924592  | 4.135734  |
| H  | -1.529307 | -1.821423 | 4.318415  |
| H  | -0.086827 | -1.016086 | 4.987980  |
| H  | -1.701705 | -0.298359 | 5.223305  |
| N  | 0.209176  | 1.395796  | -0.427505 |
| C  | 1.251560  | 2.143496  | -0.494035 |
| C  | -1.021287 | 2.091398  | -0.717390 |
| C  | 2.658447  | 1.695487  | -0.412414 |
| C  | -1.978773 | 2.293613  | 0.274607  |
| C  | -1.234829 | 2.567490  | -2.011315 |

|   |           |           |           |
|---|-----------|-----------|-----------|
| H | 1.528928  | 6.024061  | 0.092270  |
| H | -6.262470 | -2.053823 | 0.030231  |
| C | 0.232425  | -2.606564 | -0.589483 |
| C | -0.860499 | -2.018801 | -1.274258 |
| C | 1.572160  | -2.189607 | -0.812898 |
| H | 0.040563  | -3.340943 | 0.196718  |
| C | -0.644370 | -0.945019 | -2.174772 |
| H | -1.881144 | -2.336788 | -1.052146 |
| C | 2.731425  | -2.886215 | -0.144051 |
| C | 1.768234  | -1.122452 | -1.733442 |
| C | -1.787291 | -0.277779 | -2.866140 |
| C | 0.690427  | -0.501656 | -2.399756 |
| C | 3.312776  | -3.899861 | -1.127666 |
| C | 3.806673  | -1.938373 | 0.364837  |
| H | 2.312669  | -3.419011 | 0.724519  |
| H | 2.757218  | -0.675894 | -1.841072 |
| H | -1.856138 | -0.659782 | -3.897884 |
| H | -2.745200 | -0.483828 | -2.366557 |
| H | -1.641892 | 0.811576  | -2.931339 |
| H | 0.878464  | 0.361229  | -3.043098 |
| H | 2.547911  | -4.610483 | -1.481252 |
| H | 3.733886  | -3.389385 | -2.012265 |
| H | 4.123977  | -4.477498 | -0.655945 |
| H | 4.607335  | -2.512356 | 0.858312  |
| H | 3.393940  | -1.220194 | 1.089877  |
| H | 4.276310  | -1.365765 | -0.453938 |

\*

-----

|   |           |           |           |
|---|-----------|-----------|-----------|
| C | 3.504031  | 2.267093  | 0.545473  |
| C | 3.168123  | 0.775828  | -1.336351 |
| C | -3.142897 | 2.995805  | -0.026975 |
| C | -2.408028 | 3.260860  | -2.309376 |
| C | 4.841069  | 1.879519  | 0.611866  |
| C | 4.513588  | 0.417844  | -1.285731 |
| C | -3.362220 | 3.481877  | -1.317389 |
| C | 5.347859  | 0.957567  | -0.305939 |
| H | 1.101193  | 3.223603  | -0.640973 |
| H | -1.818508 | 1.891156  | 1.273529  |
| H | -0.484693 | 2.380573  | -2.782895 |
| H | 3.109881  | 3.001627  | 1.252419  |
| H | 2.493683  | 0.327145  | -2.067668 |
| H | -3.889532 | 3.156425  | 0.753546  |
| H | -2.572627 | 3.628724  | -3.324355 |
| H | 5.492797  | 2.307230  | 1.376461  |
| H | 4.908589  | -0.298570 | -2.009364 |
| H | -4.279036 | 4.027762  | -1.549577 |
| H | 6.399007  | 0.664088  | -0.261142 |
| O | 0.614924  | -0.832590 | -2.017587 |
| C | 0.268545  | -1.772967 | -2.873096 |
| C | 0.560838  | -1.428225 | -4.287986 |
| O | -0.244514 | -2.852896 | -2.532924 |
| H | 1.616228  | -1.140602 | -4.402624 |
| H | -0.049242 | -0.562208 | -4.585921 |
| H | 0.333709  | -2.277851 | -4.943355 |
| O | -1.754999 | -0.617156 | -0.832729 |
| C | -2.924038 | -0.609571 | -0.282249 |
| C | -4.047100 | -0.469729 | -1.294925 |
| O | -3.168484 | -0.681575 | 0.926163  |
| H | -3.950478 | -1.236011 | -2.077442 |
| H | -3.964072 | 0.513402  | -1.783122 |
| H | -5.025661 | -0.551867 | -0.806493 |

\*

-----

**para-cymene (p-cym)**

CPCM (MeOH)

|                      |             |
|----------------------|-------------|
| M06 SCF (DZ) =       | -389.193220 |
| G (1 atm) =          | -389.020377 |
| qh-G (1 mol/L) =     | -389.015737 |
| qh-G (24.56 mol/L) = | -389.012715 |
| Lowest Frequency =   | 31.73       |

|                           |             |
|---------------------------|-------------|
| HF SCF energy (TZ) =      | -386.974197 |
| HF SCF energy (QZ) =      | -386.998301 |
| Correlation energy (DZ) = | -1.508015   |
| Correlation energy (TZ) = | -1.800727   |
| DLPNO-CCSD(T1)/CBS =      | -388.977333 |

|                     |             |
|---------------------|-------------|
| PBE0+D3BJ (ATZ) =   | -389.186660 |
| M06-2X (ATZ) =      | -389.457186 |
| wB97M-V (ATZ) =     | -389.444198 |
| B2GP-PLYP (ATZ) =   | -389.207334 |
| B2K-PLYP (ATZ) =    | -389.154270 |
| PWPB95 (ATZ) =      | -389.317116 |
| PWPB95+D3BJ (ATZ) = | -389.326375 |
| PWPB95+D4 (ATZ) =   | -389.334867 |

\*xyz 0 1

|   |           |           |           |
|---|-----------|-----------|-----------|
| C | -0.628170 | -0.225827 | 0.003036  |
| C | -2.132314 | -0.384330 | 0.005275  |
| C | -0.027731 | 1.040804  | -0.006322 |
| C | -2.760720 | 0.199631  | -1.256087 |
| C | -2.760439 | 0.224525  | 1.254888  |
| H | -2.339927 | -1.471067 | 0.016079  |

**para-cymene (p-cym)**

CPCM (MeOH)

|                        |             |
|------------------------|-------------|
| wB97X-D3 SCF (DZ) =    | -389.431305 |
| G (1 atm) =            | -389.253700 |
| qh G-E (1 mol/L) =     | 0.182803    |
| qh G-E (24.56 mol/L) = | 0.185825    |
| Lowest Frequency =     | 36.43       |

|                           |             |
|---------------------------|-------------|
| HF SCF energy (TZ) =      | -386.975127 |
| HF SCF energy (QZ) =      | -386.998766 |
| Correlation energy (DZ) = | -1.508306   |
| Correlation energy (TZ) = | -1.800653   |
| DLPNO-CCSD(T1)/CBS =      | -388.977370 |

|                     |             |
|---------------------|-------------|
| PBE0+D3BJ (ATZ) =   | -389.186613 |
| M06-2X (ATZ) =      | -389.466654 |
| wB97M-V (ATZ) =     | -389.451952 |
| B2GP-PLYP (ATZ) =   | -389.214804 |
| B2K-PLYP (ATZ) =    | -389.162007 |
| PWPB95 (ATZ) =      | -389.324827 |
| PWPB95+D3BJ (ATZ) = | -389.334065 |
| PWPB95+D4 (ATZ) =   | -389.342511 |

SMD (MeOH)

|                           |             |
|---------------------------|-------------|
| HF SCF energy (TZ) =      | -386.979465 |
| HF SCF energy (QZ) =      | -387.003112 |
| Correlation energy (DZ) = | -1.507867   |
| Correlation energy (TZ) = | -1.800419   |
| DLPNO-CCSD(T1)/CBS =      | -388.981605 |

|   |           |           |           |
|---|-----------|-----------|-----------|
| C | 0.213192  | -1.339444 | 0.006534  |
| C | 1.355204  | 1.180155  | -0.011036 |
| H | -0.653475 | 1.939944  | -0.012515 |
| H | -2.330501 | -0.247921 | -2.166557 |
| H | -2.601138 | 1.290677  | -1.310258 |
| H | -3.849163 | 0.024286  | -1.269448 |
| H | -2.329343 | -0.204054 | 2.174017  |
| H | -2.602266 | 1.316628  | 1.286986  |
| H | -3.848679 | 0.048348  | 1.272343  |
| C | 1.601232  | -1.199899 | 0.001913  |
| H | -0.227789 | -2.342283 | 0.010903  |
| C | 2.198704  | 0.061688  | -0.005128 |
| H | 1.798157  | 2.182172  | -0.021060 |
| H | 2.234730  | -2.093323 | 0.002630  |
| C | 3.688445  | 0.228621  | 0.004341  |
| H | 4.019276  | 0.933995  | -0.775114 |
| H | 4.040302  | 0.635433  | 0.967590  |
| H | 4.205406  | -0.728368 | -0.160093 |

\*

-----

#### Cl<sup>-</sup>

CPCM (MeOH)  
M06 SCF (DZ) = -460.353686  
G (1 atm) = -460.368709  
qh-G (1 mol/L) = -460.365690  
qh-G (24.56 mol/L) = -460.362667

HF SCF energy (TZ) = -459.681515  
HF SCF energy (QZ) = -459.687835  
Correlation energy (DZ) = -0.147832  
Correlation energy (TZ) = -0.220866  
DLPNO-CCSD(T1)/CBS = -459.953281

PBE0+D3BJ (ATZ) = -460.248399  
M06-2X (ATZ) = -460.388310  
wB97M-V (ATZ) = -460.379750  
B2GP-PLYP (ATZ) = -460.229838  
B2K-PLYP (ATZ) = -460.198810  
PWPB95 (ATZ) = -460.352737  
PWPB95+D3BJ (ATZ) = -460.352737  
PWPB95+D4 (ATZ) = -460.352737

-----

#### cis-D<sup>+</sup>

CPCM (MeOH)  
M06 SCF (DZ) = -1268.445316  
G (1 atm) = -1268.037024  
qh-G (1 mol/L) = -1268.028571  
qh-G (24.56 mol/L) = -1268.025549  
Lowest Frequency = 25.86

#### \*xyz 0 1

|   |           |           |           |
|---|-----------|-----------|-----------|
| C | -0.626276 | -0.220788 | 0.008254  |
| C | -2.137970 | -0.381134 | 0.008070  |
| C | -0.024994 | 1.046470  | 0.002921  |
| C | -2.764924 | 0.194954  | -1.266768 |
| C | -2.773089 | 0.229730  | 1.262352  |
| C | 0.214652  | -1.336116 | 0.007127  |
| C | 1.359781  | 1.186010  | -0.003798 |
| C | 1.604840  | -1.196684 | -0.000086 |
| C | 2.203047  | 0.065451  | -0.005001 |
| C | 3.702659  | 0.226225  | -0.000929 |
| H | -2.342939 | -1.465222 | 0.022066  |
| H | -0.648301 | 1.945419  | 0.001551  |
| H | -2.327498 | -0.262526 | -2.167572 |
| H | -2.608571 | 1.284279  | -1.330871 |
| H | -3.850846 | 0.011525  | -1.283164 |
| H | -2.343021 | -0.203670 | 2.178465  |
| H | -2.616711 | 1.320303  | 1.298249  |
| H | -3.859268 | 0.047680  | 1.275513  |
| H | -0.224675 | -2.338061 | 0.009344  |
| H | 1.798976  | 2.187989  | -0.010368 |
| H | 2.234742  | -2.091053 | -0.003667 |
| H | 4.029955  | 0.931060  | -0.780124 |
| H | 4.055538  | 0.623082  | 0.964464  |
| H | 4.207887  | -0.734534 | -0.173111 |

\*

-----

#### Cl<sup>-</sup>

CPCM (MeOH)  
wB97X-D3 SCF (DZ) = -460.370458  
G (1 atm) = -460.385500  
qh G-E (1 mol/L) = -0.012024  
qh G-E (24.56 mol/L) = -0.009001

HF SCF energy (TZ) = -459.681518  
HF SCF energy (QZ) = -459.687834  
Correlation energy (DZ) = -0.147832  
Correlation energy (TZ) = -0.220866  
DLPNO-CCSD(T1)/CBS = -459.953279

PBE0+D3BJ (ATZ) = -460.248393  
M06-2X (ATZ) = -460.386666  
wB97M-V (ATZ) = -460.378604  
B2GP-PLYP (ATZ) = -460.228600  
B2K-PLYP (ATZ) = -460.197558  
PWPB95 (ATZ) = -460.351461  
PWPB95+D3BJ (ATZ) = -460.351461  
PWPB95+D4 (ATZ) = -460.351461

#### SMD (MeOH)

HF SCF energy (TZ) = -459.672863  
HF SCF energy (QZ) = -459.680069  
Correlation energy (DZ) = -0.147804  
Correlation energy (TZ) = -0.220905  
DLPNO-CCSD(T1)/CBS = -459.945862

-----

#### cis-D<sup>+</sup>

CPCM (MeOH)  
wB97X-D3 SCF (DZ) = -1269.080679  
G (1 atm) = -1268.659844  
qh G-E (1 mol/L) = 0.433455  
qh G-E (24.56 mol/L) = 0.436478  
Lowest Frequency = 13.86

HF SCF energy (TZ) = -1261.330526  
 HF SCF energy (QZ) = -1261.405053  
 Correlation energy (DZ) = -4.687907  
 Correlation energy (TZ) = -5.722333  
 DLPNO-CCSD(T1)/CBS = -1267.754294

HF SCF energy (TZ) = -1261.332736  
 HF SCF energy (QZ) = -1261.406018  
 Correlation energy (DZ) = -4.688373  
 Correlation energy (TZ) = -5.722636  
 DLPNO-CCSD(T1)/CBS = -1267.755092

\*xyz 1 1

|    |           |           |           |
|----|-----------|-----------|-----------|
| Ru | 0.423619  | -0.465018 | 0.255641  |
| N  | -1.450391 | 0.600011  | 0.005791  |
| O  | 0.365800  | -0.609511 | -1.903810 |
| C  | -1.619531 | 1.858253  | -0.238941 |
| C  | -2.655476 | -0.170478 | 0.132286  |
| O  | -0.617365 | -2.098198 | -0.678451 |
| C  | -0.355075 | -1.656374 | -1.841479 |
| C  | -0.580901 | 2.836531  | -0.545611 |
| H  | -2.649154 | 2.250115  | -0.184031 |
| C  | -2.894034 | -0.922141 | 1.282802  |
| C  | -3.575306 | -0.181583 | -0.917693 |
| C  | -0.875936 | -2.330939 | -3.056811 |
| C  | 0.496233  | 2.554129  | -1.397883 |
| C  | -0.700357 | 4.111659  | 0.026245  |
| C  | -4.064706 | -1.663264 | 1.390664  |
| H  | -2.161604 | -0.920772 | 2.093331  |
| C  | -4.740760 | -0.937447 | -0.807242 |
| H  | -3.360839 | 0.384457  | -1.829110 |
| H  | -0.511134 | -3.368506 | -3.080517 |
| H  | -1.974071 | -2.373212 | -3.004335 |
| H  | -0.562661 | -1.805135 | -3.966022 |
| C  | 1.462281  | 3.525972  | -1.633175 |
| H  | 0.554282  | 1.583203  | -1.895446 |
| C  | 0.286499  | 5.067329  | -0.187336 |
| H  | -1.560940 | 4.339821  | 0.662193  |
| C  | -4.989993 | -1.675522 | 0.346450  |
| H  | -4.254271 | -2.239805 | 2.298884  |
| H  | -5.454670 | -0.949467 | -1.634073 |
| C  | 1.370117  | 4.773145  | -1.014268 |
| H  | 2.293895  | 3.310125  | -2.308114 |
| H  | 0.204472  | 6.049503  | 0.282994  |
| H  | -5.903797 | -2.267888 | 0.431790  |
| H  | 2.139045  | 5.528475  | -1.193230 |
| C  | 2.423516  | 0.302674  | 0.441815  |
| C  | 1.603341  | 1.047882  | 1.315971  |
| C  | 2.499466  | -1.125175 | 0.502357  |
| H  | 2.949326  | 0.824553  | -0.364983 |
| C  | 0.784218  | 0.388414  | 2.278308  |
| H  | 1.534858  | 2.132632  | 1.201411  |
| C  | 3.367038  | -1.862815 | -0.486385 |
| C  | 1.675868  | -1.765236 | 1.455022  |
| C  | -0.135421 | 1.173316  | 3.151251  |
| C  | 0.823271  | -1.024415 | 2.325812  |
| C  | 2.943186  | -3.302465 | -0.723702 |
| C  | 4.817682  | -1.788779 | -0.012886 |
| H  | 3.284221  | -1.309157 | -1.441304 |
| H  | 1.593857  | -2.854592 | 1.454720  |
| H  | -0.515659 | 2.068446  | 2.637243  |
| H  | 0.419493  | 1.517366  | 4.038945  |
| H  | -0.983621 | 0.569904  | 3.503536  |
| H  | 0.144649  | -1.561119 | 2.993169  |
| H  | 1.881939  | -3.386929 | -1.009399 |
| H  | 3.107293  | -3.924264 | 0.172942  |
| H  | 3.547332  | -3.739659 | -1.532828 |
| H  | 5.156220  | -0.748425 | 0.115699  |
| H  | 4.933232  | -2.306961 | 0.954487  |
| H  | 5.482998  | -2.276334 | -0.741998 |

\*

SMD (MeOH)

HF SCF energy (TZ) = -1261.350107  
 HF SCF energy (QZ) = -1261.423275  
 Correlation energy (DZ) = -4.684345  
 Correlation energy (TZ) = -5.719272  
 DLPNO-CCSD(T1)/CBS = -1267.769338

\* xyz 1 1

|    |           |           |           |
|----|-----------|-----------|-----------|
| Ru | 0.416169  | -0.464418 | 0.253769  |
| C  | 2.374808  | 0.396774  | 0.455566  |
| C  | 1.526718  | 1.050227  | 1.369428  |
| C  | 2.522891  | -1.029805 | 0.447711  |
| C  | 0.750416  | 0.301450  | 2.307139  |
| C  | 3.436300  | -1.676512 | -0.574923 |
| C  | 1.747480  | -1.757650 | 1.372729  |
| C  | -0.184065 | 1.006263  | 3.244784  |
| C  | 0.860406  | -1.105423 | 2.284481  |
| C  | 3.063404  | -3.118163 | -0.913582 |
| C  | 4.883200  | -1.575153 | -0.074465 |
| H  | 2.872966  | 0.985213  | -0.318178 |
| H  | 1.403355  | 2.131926  | 1.309941  |
| H  | 3.347238  | -1.071737 | -1.492889 |
| H  | 1.734221  | -2.847190 | 1.330997  |
| H  | -0.702073 | 1.834930  | 2.742775  |
| H  | 0.405221  | 1.430342  | 4.071805  |
| H  | -0.924468 | 0.317333  | 3.670154  |
| H  | 0.218202  | -1.709056 | 2.927355  |
| H  | 2.009328  | -3.210619 | -1.216281 |
| H  | 3.237857  | -3.793801 | -0.061328 |
| H  | 3.687174  | -3.472925 | -1.746670 |
| H  | 5.168321  | -0.531733 | 0.128197  |
| H  | 5.012139  | -2.152717 | 0.854815  |
| H  | 5.575331  | -1.977959 | -0.828538 |
| N  | -1.448736 | 0.604548  | 0.029461  |
| C  | -1.626542 | 1.858159  | -0.206542 |
| C  | -2.658276 | -0.173159 | 0.142905  |
| C  | -0.575111 | 2.841255  | -0.509956 |
| C  | -2.937091 | 0.877075  | 1.314133  |
| C  | -3.529449 | -0.235710 | -0.945321 |
| C  | 0.444862  | 2.574964  | -1.432837 |
| C  | -0.639533 | 4.090696  | 0.120664  |
| C  | -4.104377 | -1.631226 | 1.398314  |
| C  | -4.692066 | -1.001367 | -0.855854 |
| C  | 1.415878  | 3.539874  | -1.686949 |
| C  | 0.348870  | 5.042034  | -0.118795 |
| C  | -4.982683 | -1.698953 | 0.314776  |
| C  | 1.378598  | 4.765611  | -1.019806 |
| H  | -2.655466 | 2.243865  | -0.169623 |
| H  | -2.249508 | -0.829551 | 2.158899  |
| H  | -3.284327 | 0.298191  | -1.866318 |
| H  | 0.463444  | 1.620108  | -1.959780 |
| H  | -1.453527 | 4.306614  | 0.816985  |
| H  | -4.327731 | -2.173362 | 2.319329  |
| H  | -5.368186 | -1.053180 | -1.711649 |
| H  | 2.205585  | 3.332186  | -2.411890 |
| H  | 0.309836  | 6.006331  | 0.391259  |
| H  | -5.891900 | -2.299603 | 0.383274  |
| H  | 2.148052  | 5.515754  | -1.214819 |
| O  | 0.341770  | -0.601512 | -1.889619 |

```

-----
O   -0.623104   -2.096054   -0.663330
C   -0.374954   -1.652360   -1.829222
C   -0.905969   -2.325625   -3.049146
H   -0.496369   -3.344304   -3.101445
H   -1.998701   -2.405906   -2.965085
H   -0.634440   -1.766481   -3.950821

```

\*

**D<sup>+</sup>•Cl<sup>-</sup>**

```

-----
CPCM (MeOH)
wB97X-D3 SCF (DZ) =      -1729.462944
G (1 atm) =              -1729.044486
qh G-E (1 mol/L) =       0.432279
qh G-E (24.56 mol/L) =   0.435301
Lowest Frequency =       5.55

```

```

HF SCF energy (TZ) =      -1721.009192
HF SCF energy (QZ) =      -1721.087232
Correlation energy (DZ) =  -4.847640
Correlation energy (TZ) =  -5.955552
DLPNO-CCSD(T1)/CBS =     -1727.713691

```

**SMD (MeOH)**

```

HF SCF energy (TZ) =      -1721.017651
HF SCF energy (QZ) =      -1721.096022
Correlation energy (DZ) =  -4.843942
Correlation energy (TZ) =  -5.952405
DLPNO-CCSD(T1)/CBS =     -1727.719755

```

**\*xyz 0 1**

```

Ru   0.014848   0.273348   0.929553
C    1.699592   1.008311   2.037271
C    2.063189   1.016245   0.669428
C    0.537878   1.684441   2.509015
C    1.258410   1.683651  -0.293826
C    0.143879   1.647081   3.957526
C   -0.268828   2.315658   1.528507
C    1.720466   1.714057  -1.737506
C    0.070566   2.317565   0.146630
C    0.608612   1.712790  -2.782191
C    2.620375   2.950115  -1.892526
H    2.282074   0.398744   2.731520
H    2.942440   0.459950   0.343895
H    0.497218   0.722941   4.434215
H    0.598033   2.499800   4.484166
H   -0.946206   1.714418   4.070288
H   -1.235613   2.728938   1.824752
H    2.346359   0.820669  -1.890600
H   -0.634874   2.773640  -0.556436
H    0.004222   0.796322  -2.736680
H   -0.067919   2.574101  -2.670048
H    1.055528   1.767426  -3.785615
H    3.444646   2.945145  -1.163576
H    2.038160   3.874554  -1.749295
H    3.055507   2.971471  -2.902484
C    2.327097  -2.256999   0.372367
N   -0.319186  -1.082504  -0.729020
C    1.964177  -1.967496  -0.948973
C    3.671328  -2.408045   0.702888
C   -1.670329  -1.205250  -1.218282
C    0.557773  -1.796844  -1.345686
C    2.949625  -1.876198  -1.940793
C    4.655298  -2.259939  -0.276097
C   -2.411982  -0.064537  -1.529428
C   -2.241352  -2.473499  -1.342541

```

|    |           |           |           |
|----|-----------|-----------|-----------|
| C  | 4.293931  | -1.998092 | -1.598788 |
| C  | -3.713838 | -0.201389 | -2.000809 |
| C  | -3.551951 | -2.600116 | -1.804475 |
| C  | -4.289124 | -1.466399 | -2.139677 |
| H  | 1.554295  | -2.374093 | 1.133406  |
| H  | 3.951347  | -2.637816 | 1.732801  |
| H  | 0.242070  | -2.321680 | -2.258534 |
| H  | 2.661627  | -1.682366 | -2.977289 |
| H  | 5.709524  | -2.363088 | -0.010088 |
| H  | -1.988422 | 0.933669  | -1.403677 |
| H  | -1.668441 | -3.357889 | -1.054526 |
| H  | 5.061557  | -1.895505 | -2.368190 |
| H  | -4.282842 | 0.696256  | -2.252092 |
| H  | -3.996623 | -3.593382 | -1.893402 |
| H  | -5.315177 | -1.565651 | -2.499723 |
| O  | -0.268754 | -1.502707 | 2.122397  |
| O  | -1.961431 | -0.292505 | 1.537718  |
| C  | -1.531613 | -1.339467 | 2.114893  |
| C  | -2.456737 | -2.350321 | 2.704031  |
| H  | -3.436743 | -1.902979 | 2.903683  |
| H  | -2.577983 | -3.164453 | 1.973502  |
| H  | -2.024938 | -2.770644 | 3.620455  |
| Cl | -2.739596 | 3.681531  | -1.519154 |

\*

-----  
**D<sup>+</sup>•S•Cl<sup>-</sup>**

CPCM (MeOH)

wB97X-D3 SCF (DZ) = -1845.159347

G (1 atm) = -1844.694124

qh G-E (1 mol/L) = 0.482086

qh G-E (24.56 mol/L) = 0.485109

Lowest Frequency = 17.43

SMD (MeOH)

HF SCF energy (TZ) = -1836.096877

HF SCF energy (QZ) = -1836.182869

Correlation energy (DZ) = -5.221944

Correlation energy (TZ) = -6.423430

DLPNO-CCSD(T1)/CBS = -1843.334281

\*xyz 0 1

|    |           |           |           |
|----|-----------|-----------|-----------|
| Ru | 0.008581  | 0.468864  | 0.697069  |
| C  | 2.212555  | -2.068766 | 0.379846  |
| C  | 0.557135  | 1.888262  | 2.273002  |
| C  | 2.027568  | 1.207310  | 0.391074  |
| H  | 2.291863  | 0.577091  | 2.451614  |
| O  | -0.807520 | -2.697978 | 1.663021  |
| N  | -0.336351 | -1.017516 | -0.839199 |
| Cl | -3.899135 | 2.475356  | 1.403895  |
| O  | -1.252314 | -0.514883 | 1.894512  |
| C  | 1.929019  | -1.876939 | -0.979806 |
| C  | 3.537345  | -2.159100 | 0.801020  |
| C  | 1.695143  | 1.191408  | 1.774259  |
| H  | 1.385356  | -2.177410 | 1.087953  |
| C  | 0.182674  | 1.831613  | 3.723621  |
| C  | -0.277877 | 2.508340  | 1.317476  |
| C  | 1.216437  | 1.874383  | -0.557508 |
| H  | 2.884932  | 0.626157  | 0.048309  |
| C  | -1.595610 | -1.786675 | 1.878876  |
| C  | -1.711696 | -1.178007 | -1.228178 |
| C  | 0.536179  | -1.757763 | -1.428621 |
| H  | -3.088374 | 2.994436  | -0.461703 |
| C  | 2.968472  | -1.820574 | -1.916914 |
| C  | 4.574602  | -2.048298 | -0.126522 |
| H  | 3.760079  | -2.314858 | 1.858455  |



|   |           |           |           |
|---|-----------|-----------|-----------|
| H | 0.514029  | 0.888790  | 4.178808  |
| H | 0.672835  | 2.661123  | 4.255089  |
| H | -0.902813 | 1.932875  | 3.851653  |
| C | 0.033251  | 2.484868  | -0.076192 |
| H | -1.254820 | 2.897233  | 1.620392  |
| C | 1.606459  | 1.875567  | -2.022233 |
| C | -3.057420 | -2.014786 | 2.171706  |
| C | -2.521464 | -0.052097 | -1.388736 |
| C | -2.252881 | -2.460315 | -1.369043 |
| H | 0.225234  | -2.347192 | -2.302383 |
| C | 4.290510  | -1.882828 | -1.484440 |
| H | 2.739287  | -1.698309 | -2.978381 |
| H | 5.612775  | -2.106438 | 0.207760  |
| H | -0.708402 | 2.895864  | -0.767319 |
| C | 0.425374  | 1.835282  | -2.989729 |
| C | 2.490516  | 3.106568  | -2.267174 |
| H | 2.222117  | 0.976230  | -2.187162 |
| H | -3.328781 | -1.531960 | 3.121092  |
| H | -3.654122 | -1.538872 | 1.377972  |
| H | -3.281157 | -3.086826 | 2.213473  |
| C | -3.866646 | -0.211131 | -1.713494 |
| H | -2.124968 | 0.958758  | -1.272198 |
| C | -3.598518 | -2.608740 | -1.698381 |
| H | -1.631651 | -3.337865 | -1.180429 |
| H | 5.103420  | -1.809111 | -2.209372 |
| H | 0.800389  | 1.816286  | -4.023255 |
| H | -0.222881 | 2.719464  | -2.887679 |
| H | -0.192905 | 0.938299  | -2.840897 |
| H | 3.363351  | 3.113700  | -1.596983 |
| H | 1.919865  | 4.034035  | -2.098095 |
| H | 2.853496  | 3.110749  | -3.305525 |
| C | -4.408633 | -1.486421 | -1.872058 |
| H | -4.491903 | 0.675824  | -1.832756 |
| H | -4.017849 | -3.611586 | -1.801011 |
| H | -5.465413 | -1.606601 | -2.118984 |
| C | -3.624895 | 3.848358  | -2.141168 |
| H | -3.156855 | 4.060879  | -3.113426 |
| H | -4.509087 | 3.210087  | -2.318314 |
| H | -3.969757 | 4.804963  | -1.708825 |
| O | -2.664260 | 3.211902  | -1.324638 |

\*

-----  
**D<sup>+</sup>•S<sub>2</sub>•Cl<sup>-</sup>**

CPCM (MeOH)

wB97X-D3 SCF (DZ) = -1960.896867

G (1 atm) = -1960.381693

qh G-E (1 mol/L) = 0.533708

qh G-E (24.56 mol/L) = 0.536730

Lowest Frequency = 10.86

SMD (MeOH)

HF SCF energy (TZ) = -1951.211649

HF SCF energy (QZ) = -1951.305265

Correlation energy (DZ) = -5.606170

Correlation energy (TZ) = -6.899144

DLPNO-CCSD(T1)/CBS = -1958.988147

\*xyz 0 1

|    |           |          |          |
|----|-----------|----------|----------|
| Ru | -0.198173 | 0.029951 | 0.850560 |
|----|-----------|----------|----------|

|   |          |          |          |
|---|----------|----------|----------|
| C | 1.361857 | 0.789684 | 2.111406 |
|---|----------|----------|----------|

|   |          |          |          |
|---|----------|----------|----------|
| C | 1.756136 | 1.016113 | 0.770224 |
|---|----------|----------|----------|

|   |          |          |          |
|---|----------|----------|----------|
| C | 0.120018 | 1.268378 | 2.618151 |
|---|----------|----------|----------|

|   |          |          |          |
|---|----------|----------|----------|
| H | 1.988631 | 0.157609 | 2.744437 |
|---|----------|----------|----------|

|   |           |          |          |
|---|-----------|----------|----------|
| C | -0.357296 | 2.154387 | 0.341844 |
|---|-----------|----------|----------|

|   |           |          |          |
|---|-----------|----------|----------|
| C | -0.731692 | 1.930490 | 1.696174 |
|---|-----------|----------|----------|

|    |           |           |            |
|----|-----------|-----------|------------|
| C  | 0.904292  | 1.713219  | -0.129496  |
| C  | 2.391843  | -2.139292 | 0.029266   |
| O  | -0.284047 | -1.901937 | 1.803270   |
| Cl | -4.915404 | 2.024426  | 0.704828   |
| N  | -0.353006 | -1.124003 | -0.983429  |
| O  | -2.102300 | -0.837320 | 1.323813   |
| H  | 2.699485  | 0.604783  | 0.410139   |
| C  | -0.315655 | 0.995567  | 4.029627   |
| H  | -1.077492 | 2.619331  | -0.335453  |
| H  | -1.749682 | 2.166244  | 2.018178   |
| C  | 1.388092  | 1.976613  | -1.541905  |
| C  | 2.014776  | -1.734991 | -1.257851  |
| C  | 3.741630  | -2.204773 | 0.365649   |
| H  | 1.626403  | -2.412495 | 0.757185   |
| C  | -1.557277 | -1.887531 | 1.784955   |
| H  | -3.965638 | 1.865326  | 2.593790   |
| H  | -3.488732 | 2.717191  | -0.684732  |
| C  | -1.677539 | -1.333351 | -1.514925  |
| C  | 0.602680  | -1.657081 | -1.663161  |
| H  | 0.035383  | 0.010015  | 4.365214   |
| H  | 0.115095  | 1.756068  | 4.698811   |
| H  | -1.409762 | 1.047955  | 4.105467   |
| C  | 0.297166  | 2.000858  | -2.609117  |
| C  | 2.162421  | 3.303566  | -1.510827  |
| H  | 2.102656  | 1.175258  | -1.788909  |
| C  | 2.996181  | -1.440123 | -2.213601  |
| C  | 4.716043  | -1.858354 | -0.572076  |
| H  | 4.033676  | -2.525011 | 1.367798   |
| C  | -2.364386 | -3.060143 | 2.230369   |
| O  | -3.492115 | 1.933675  | 3.450663   |
| O  | -2.832549 | 3.023557  | -1.349901  |
| C  | -2.542425 | -0.254374 | -1.703445  |
| C  | -2.099439 | -2.634268 | -1.799193  |
| H  | 0.355339  | -2.090622 | -2.642784  |
| H  | 0.749229  | 2.226598  | -3.586005  |
| H  | -0.465102 | 2.767928  | -2.404779  |
| H  | -0.212955 | 1.031421  | -2.693686  |
| H  | 2.973383  | 3.280918  | -0.767355  |
| H  | 1.489858  | 4.139939  | -1.261005  |
| H  | 2.606138  | 3.502669  | -2.497482  |
| C  | 4.343199  | -1.478372 | -1.862701  |
| H  | 2.699225  | -1.156073 | -3.226530  |
| H  | 5.773175  | -1.898709 | -0.300297  |
| H  | -3.334219 | -2.727808 | 2.619080   |
| H  | -2.541652 | -3.702179 | 1.353851   |
| H  | -1.818317 | -3.637800 | 2.985233   |
| C  | -3.690491 | 3.251457  | 3.921567   |
| C  | -3.539148 | 3.639882  | -2.406228  |
| C  | -3.819599 | -0.482332 | -2.207503  |
| H  | -2.239818 | 0.764845  | -1.457482  |
| C  | -3.384373 | -2.852937 | -2.296897  |
| H  | -1.430727 | -3.476190 | -1.605366  |
| H  | 5.104796  | -1.220845 | -2.601269  |
| H  | -3.123483 | 3.366709  | 4.857343   |
| H  | -4.754159 | 3.461870  | 4.135810   |
| H  | -3.326501 | 4.011310  | 3.205572   |
| H  | -4.092036 | 4.535438  | -2.069768  |
| H  | -4.256128 | 2.949768  | -2.886246  |
| H  | -2.807214 | 3.953647  | -3.164965  |
| C  | -4.245716 | -1.777970 | -2.506698  |
| H  | -4.492164 | 0.365922  | -2.350902  |
| H  | -3.711381 | -3.872611 | -2.510855  |
| H  | -5.253321 | -1.949103 | -2.891267* |

-----  
D<sup>+</sup>•S<sub>3</sub>•Cl<sup>-</sup>

CPCM (MeOH)  
wB97X-D3 SCF (DZ) = -2076.607611  
G (1 atm) = -2076.044296  
qh G-E (1 mol/L) = 0.583816  
qh G-E (24.56 mol/L) = 0.586838  
Lowest Frequency = 13.43

SMD (MeOH)  
HF SCF energy (TZ) = -2066.307633  
HF SCF energy (QZ) = -2066.408936  
Correlation energy (DZ) = -5.987585  
Correlation energy (TZ) = -7.372184  
DLPNO-CCSD(T1)/CBS = -2074.620713

\*xyz 0 1  
Ru -0.115128 0.277583 0.793867  
C 1.503978 1.240674 1.828986  
C 1.821730 1.252727 0.450956  
C 0.280185 1.779177 2.324937  
H 2.175003 0.723822 2.518670  
C -0.628650 2.282707 1.360675  
C -0.328446 2.294224 -0.031727  
C 0.908578 1.789220 -0.499123  
Cl -4.408528 2.369403 1.188703  
C 2.441046 -1.983853 0.287587  
N -0.324754 -1.173959 -0.808750  
O -0.198967 -1.432462 2.114416  
O -2.005704 -0.475777 1.419952  
H 2.752108 0.798506 0.109088  
C -0.082330 1.714419 3.781044  
H -1.637393 2.567192 1.674055  
H -1.091598 2.642009 -0.731604  
C 1.306689 1.826259 -1.961558  
H -3.416412 2.685775 -0.692054  
H -5.625729 1.569365 -0.451769  
H -3.527267 1.051814 2.873222  
C 2.038302 -1.803412 -1.042056  
C 3.796543 -1.980370 0.605897  
H 1.690984 -2.137048 1.065377  
C -1.663622 -1.482383 -1.248746  
C 0.617363 -1.803008 -1.422203  
C -1.472220 -1.393811 2.115857  
H -1.147090 1.464714 3.900061  
H 0.105703 2.690843 4.252622  
H 0.524004 0.960372 4.300641  
C 0.155750 1.667411 -2.951652  
C 2.057767 3.146990 -2.190643  
H 2.019706 1.001033 -2.119134  
O -2.969862 2.818702 -1.554836  
O -6.228675 1.330229 -1.183216  
O -3.340687 0.742958 3.780089  
C 2.999994 -1.664197 -2.051349  
C 4.751344 -1.787994 -0.394377  
H 4.108648 -2.125325 1.642069  
C -2.565696 -0.460631 -1.552614  
C -2.064705 -2.818477 -1.315416  
H 0.350081 -2.393301 -2.310350  
C -2.311330 -2.357339 2.882805  
H 0.545935 1.738824 -3.977442  
H -0.608971 2.449501 -2.828128  
H -0.337678 0.691040 -2.849763  
H 2.911408 3.250601 -1.503994  
H 1.386354 4.007133 -2.036937  
H 2.439070 3.188695 -3.221590  
C -3.865537 3.511272 -2.403999  
C -7.335020 2.204533 -1.102260

|   |           |           |           |
|---|-----------|-----------|-----------|
| C | -4.104105 | 1.546204  | 4.657623  |
| C | 4.353109  | -1.633082 | -1.723443 |
| H | 2.682938  | -1.555700 | -3.091841 |
| H | 5.813225  | -1.773533 | -0.139029 |
| C | -3.860449 | -0.783078 | -1.948761 |
| H | -2.281363 | 0.589706  | -1.472492 |
| C | -3.365197 | -3.133633 | -1.711502 |
| H | -1.368148 | -3.609871 | -1.029301 |
| H | -2.924795 | -2.934585 | 2.176129  |
| H | -2.984701 | -1.771351 | 3.523948  |
| H | -1.691052 | -3.033137 | 3.481365  |
| H | -4.065435 | 4.537392  | -2.045941 |
| H | -4.824691 | 2.975136  | -2.493799 |
| H | -3.402585 | 3.578542  | -3.399170 |
| H | -8.048702 | 1.922507  | -1.890518 |
| H | -7.853999 | 2.132989  | -0.128990 |
| H | -7.050112 | 3.261379  | -1.262478 |
| H | -5.189479 | 1.448595  | 4.474296  |
| H | -3.838318 | 2.616351  | 4.584626  |
| H | -3.898014 | 1.210174  | 5.684481  |
| H | 5.099633  | -1.497076 | -2.508355 |
| C | -4.263823 | -2.118174 | -2.030298 |
| H | -4.572467 | 0.017354  | -2.162370 |
| H | -3.674513 | -4.180032 | -1.755871 |
| H | -5.285428 | -2.363709 | -2.328507 |

\*

-----  
**D<sup>+</sup>•AcO<sup>-</sup>**

CPCM (MeOH)

wB97X-D3 SCF (DZ) = -1497.665811

G (1 atm) = -1497.199547

qh G-E (1 mol/L) = 0.479598

qh G-E (24.56 mol/L) = 0.482621

Lowest Frequency = 8.69

HF SCF energy (TZ) = -1488.757160

HF SCF energy (QZ) = -1488.847555

Correlation energy (DZ) = -5.383606

Correlation energy (TZ) = -6.590971

DLPNO-CCSD(T1)/CBS = -1496.171269

SMD (MeOH)

HF SCF energy (TZ) = -1488.778992

HF SCF energy (QZ) = -1488.868950

Correlation energy (DZ) = -5.377186

Correlation energy (TZ) = -6.585461

DLPNO-CCSD(T1)/CBS = -1496.187555

\*xyz 0 1

|    |          |           |           |
|----|----------|-----------|-----------|
| Ru | 0.465596 | -0.570270 | -0.079354 |
|----|----------|-----------|-----------|

|   |           |           |           |
|---|-----------|-----------|-----------|
| O | -0.321286 | -0.641326 | -1.887045 |
|---|-----------|-----------|-----------|

|   |           |           |           |
|---|-----------|-----------|-----------|
| C | -0.736002 | -1.742072 | -2.510036 |
|---|-----------|-----------|-----------|

|   |           |           |           |
|---|-----------|-----------|-----------|
| C | -2.209159 | -1.745104 | -2.815029 |
|---|-----------|-----------|-----------|

|   |          |           |           |
|---|----------|-----------|-----------|
| O | 0.014107 | -2.661067 | -2.795001 |
|---|----------|-----------|-----------|

|   |          |           |          |
|---|----------|-----------|----------|
| C | 2.162714 | -1.212613 | 1.092479 |
|---|----------|-----------|----------|

|   |          |           |          |
|---|----------|-----------|----------|
| C | 1.336101 | -0.449483 | 1.945262 |
|---|----------|-----------|----------|

|   |          |           |          |
|---|----------|-----------|----------|
| C | 1.656730 | -2.336999 | 0.369547 |
|---|----------|-----------|----------|

|   |           |           |          |
|---|-----------|-----------|----------|
| C | -0.044195 | -0.733863 | 2.056339 |
|---|-----------|-----------|----------|

|   |          |           |           |
|---|----------|-----------|-----------|
| C | 2.539336 | -3.107667 | -0.565022 |
|---|----------|-----------|-----------|

|   |          |           |          |
|---|----------|-----------|----------|
| C | 0.282177 | -2.649006 | 0.507786 |
|---|----------|-----------|----------|

|   |           |          |          |
|---|-----------|----------|----------|
| C | -0.987235 | 0.068435 | 2.928939 |
|---|-----------|----------|----------|

|   |           |           |          |
|---|-----------|-----------|----------|
| C | -0.562770 | -1.833062 | 1.300246 |
|---|-----------|-----------|----------|

|   |           |          |          |
|---|-----------|----------|----------|
| C | -0.533463 | 1.503966 | 3.185932 |
|---|-----------|----------|----------|

|   |           |           |          |
|---|-----------|-----------|----------|
| C | -1.166949 | -0.700766 | 4.246651 |
|---|-----------|-----------|----------|

|   |           |           |           |
|---|-----------|-----------|-----------|
| H | -2.522182 | -0.767428 | -3.206619 |
|---|-----------|-----------|-----------|

|   |           |           |           |
|---|-----------|-----------|-----------|
| H | -2.742707 | -1.912008 | -1.861558 |
| H | -2.454828 | -2.543684 | -3.524982 |
| H | 3.199687  | -0.908890 | 0.942003  |
| H | 1.752760  | 0.440712  | 2.417024  |
| H | 3.364958  | -2.483540 | -0.931481 |
| H | 2.969584  | -3.961864 | -0.019793 |
| H | 1.960291  | -3.482538 | -1.417698 |
| H | -0.155052 | -3.431699 | -0.113799 |
| H | -1.967170 | 0.076214  | 2.419639  |
| H | -1.653865 | -1.972579 | 1.228136  |
| H | -0.334519 | 2.049786  | 2.250924  |
| H | 0.377915  | 1.540700  | 3.804082  |
| H | -1.320741 | 2.046551  | 3.729508  |
| H | -1.548077 | -1.718049 | 4.069228  |
| H | -0.212203 | -0.781265 | 4.791578  |
| H | -1.887047 | -0.175468 | 4.891739  |
| N | 0.514896  | 1.566985  | -0.490962 |
| C | 1.563558  | 2.307093  | -0.399247 |
| C | -0.727415 | 2.217563  | -0.803086 |
| C | 2.926460  | 1.759152  | -0.320796 |
| C | -1.904236 | 1.777344  | -0.196733 |
| C | -0.770437 | 3.258681  | -1.736040 |
| C | 3.810747  | 2.210533  | 0.666274  |
| C | 3.349748  | 0.813448  | -1.264957 |
| C | -3.111433 | 2.411610  | -0.475075 |
| C | -1.984126 | 3.884471  | -2.017548 |
| C | 5.092799  | 1.671919  | 0.743057  |
| C | 4.645014  | 0.304107  | -1.203679 |
| C | -3.154913 | 3.470907  | -1.382008 |
| C | 5.510226  | 0.721060  | -0.191296 |
| H | 1.450038  | 3.400037  | -0.407703 |
| H | -1.902784 | 0.937421  | 0.499575  |
| H | 0.136290  | 3.562759  | -2.263347 |
| H | 3.483156  | 2.963113  | 1.387242  |
| H | 2.669591  | 0.494679  | -2.058936 |
| H | -4.007668 | 2.050727  | 0.032513  |
| H | -2.011532 | 4.694293  | -2.749576 |
| H | 5.773882  | 2.002104  | 1.529782  |
| H | 4.977170  | -0.423814 | -1.946495 |
| H | -4.103092 | 3.964202  | -1.606043 |
| H | 6.521205  | 0.311778  | -0.135910 |
| O | -3.426129 | -1.950763 | 0.299607  |
| C | -4.140435 | -0.923970 | 0.486294  |
| C | -5.267260 | -0.679689 | -0.520438 |
| O | -3.986199 | -0.074929 | 1.401078  |
| H | -5.666330 | -1.627336 | -0.908643 |
| H | -4.855584 | -0.115036 | -1.373674 |
| H | -6.075521 | -0.080461 | -0.078175 |

\*

-----

**trans-D<sup>+</sup>**

M CPCM (MeOH)  
 06 SCF (DZ) = -1268.442918  
 G (1 atm) = -1268.034830  
 qh-G (1 mol/L) = -1268.026232  
 qh-G (24.56 mol/L) = -1268.023209  
 Lowest Frequency = 19.38

HF SCF energy (TZ) = -1261.325967  
 HF SCF energy (QZ) = -1261.405053  
 Correlation energy (DZ) = -4.689071  
 Correlation energy (TZ) = -5.723637  
 DLPNO-CCSD(T1)/CBS = -1267.757054

\*xyz 1 1

**trans-D<sup>+</sup>**

CPCM (MeOH)  
 wB97X-D3 SCF (DZ) = -1269.080265  
 G (1 atm) = -1268.658501  
 qh G-E (1 mol/L) = 0.432697  
 qh G-E (24.56 mol/L) = 0.435720  
 Lowest Frequency = 15.49

HF SCF energy (TZ) = -1261.329005  
 HF SCF energy (QZ) = -1261.402327  
 Correlation energy (DZ) = -4.688828  
 Correlation energy (TZ) = -5.722976  
 DLPNO-CCSD(T1)/CBS = -1267.751686

SMD (MeOH)

|    |           |           |           |
|----|-----------|-----------|-----------|
| Ru | 0.423619  | -0.465018 | 0.255641  |
| N  | -1.450391 | 0.600011  | 0.005791  |
| O  | 0.365800  | -0.609511 | -1.903810 |
| C  | -1.619531 | 1.858253  | -0.238941 |
| C  | -2.655476 | -0.170478 | 0.132286  |
| O  | -0.617365 | -2.098198 | -0.678451 |
| C  | -0.355075 | -1.656374 | -1.841479 |
| C  | -0.580901 | 2.836531  | -0.545611 |
| H  | -2.649154 | 2.250115  | -0.184031 |
| C  | -2.894034 | -0.922141 | 1.282802  |
| C  | -3.575306 | -0.181583 | -0.917693 |
| C  | -0.875936 | -2.330939 | -3.056811 |
| C  | 0.496233  | 2.554129  | -1.397883 |
| C  | -0.700357 | 4.111659  | 0.026245  |
| C  | -4.064706 | -1.663264 | 1.390664  |
| H  | -2.161604 | -0.920772 | 2.093331  |
| C  | -4.740760 | -0.937447 | -0.807242 |
| H  | -3.360839 | 0.384457  | -1.829110 |
| H  | -0.511134 | -3.368506 | -3.080517 |
| H  | -1.974071 | -2.373212 | -3.004335 |
| H  | -0.562661 | -1.805135 | -3.966022 |
| C  | 1.462281  | 3.525972  | -1.633175 |
| H  | 0.554282  | 1.583203  | -1.895446 |
| C  | 0.286499  | 5.067329  | -0.187336 |
| H  | -1.560940 | 4.339821  | 0.662193  |
| C  | -4.989993 | -1.675522 | 0.346450  |
| H  | -4.254271 | -2.239805 | 2.298884  |
| H  | -5.454670 | -0.949467 | -1.634073 |
| C  | 1.370117  | 4.773145  | -1.014268 |
| H  | 2.293895  | 3.310125  | -2.308114 |
| H  | 0.204472  | 6.049503  | 0.282994  |
| H  | -5.903797 | -2.267888 | 0.431790  |
| H  | 2.139045  | 5.528475  | -1.193230 |
| C  | 2.423516  | 0.302674  | 0.441815  |
| C  | 1.603341  | 1.047882  | 1.315971  |
| C  | 2.499466  | -1.125175 | 0.502357  |
| H  | 2.949326  | 0.824553  | -0.364983 |
| C  | 0.784218  | 0.388414  | 2.278308  |
| H  | 1.534858  | 2.132632  | 1.201411  |
| C  | 3.367038  | -1.862815 | -0.486385 |
| C  | 1.675868  | -1.765236 | 1.455022  |
| C  | -0.135421 | 1.173316  | 3.151251  |
| C  | 0.823271  | -1.024415 | 2.325812  |
| C  | 2.943186  | -3.302465 | -0.723702 |
| C  | 4.817682  | -1.788779 | -0.012886 |
| H  | 3.284221  | -1.309157 | -1.441304 |
| H  | 1.593857  | -2.854592 | 1.454720  |
| H  | -0.515659 | 2.068446  | 2.637243  |
| H  | 0.419493  | 1.517366  | 4.038945  |
| H  | -0.983621 | 0.569904  | 3.503536  |
| H  | 0.144649  | -1.561119 | 2.993169  |
| H  | 1.881939  | -3.386929 | -1.009399 |
| H  | 3.107293  | -3.924264 | 0.172942  |
| H  | 3.547332  | -3.739659 | -1.532828 |
| H  | 5.156220  | -0.748425 | 0.115699  |
| H  | 4.933232  | -2.306961 | 0.954487  |
| H  | 5.482998  | -2.276334 | -0.741998 |

\*

-----

HF SCF energy (TZ) = -1261.345232  
 HF SCF energy (QZ) = -1261.418391  
 Correlation energy (DZ) = -4.685153  
 Correlation energy (TZ) = -5.720315  
 DLPNO-CCSD(T1)/CBS = -1267.765631

\*xyz 1 1

|    |           |           |           |
|----|-----------|-----------|-----------|
| Ru | 0.362131  | -0.983433 | -0.052211 |
| C  | 2.226297  | -2.031826 | 0.045192  |
| C  | 0.333494  | -2.495175 | 1.477188  |
| C  | 1.202952  | -2.937211 | 0.447317  |
| C  | 2.403863  | -0.773819 | 0.671915  |
| C  | 0.503314  | -1.238800 | 2.122064  |
| C  | 1.550144  | -0.366709 | 1.734791  |
| C  | 0.992886  | -4.249032 | -0.252032 |
| C  | 1.787732  | 0.975742  | 2.395138  |
| C  | 0.544673  | 1.614584  | 3.008810  |
| C  | 2.892382  | 0.788729  | 3.445662  |
| H  | 2.829749  | -2.269150 | -0.833423 |
| H  | -0.543357 | -3.096329 | 1.726921  |
| H  | 3.160321  | -0.085382 | 0.292334  |
| H  | -0.211293 | -0.938171 | 2.887529  |
| H  | 1.548715  | -5.039544 | 0.274006  |
| H  | 1.355936  | -4.204223 | -1.287205 |
| H  | -0.070305 | -4.523875 | -0.257389 |
| H  | 2.177101  | 1.646676  | 1.612958  |
| H  | 0.798856  | 2.616017  | 3.385351  |
| H  | -0.265670 | 1.729008  | 2.273901  |
| H  | 0.161318  | 1.030289  | 3.859812  |
| H  | 2.562502  | 0.100774  | 4.240222  |
| H  | 3.134635  | 1.756947  | 3.907581  |
| H  | 3.811374  | 0.382718  | 2.997498  |
| O  | -1.538037 | -1.524649 | -0.888613 |
| O  | 0.173848  | -1.242897 | -2.172837 |
| C  | -1.074025 | -1.476397 | -2.069011 |
| C  | -1.952114 | -1.623586 | -3.264434 |
| H  | -2.731779 | -2.370383 | -3.070940 |
| H  | -2.440714 | -0.653308 | -3.442366 |
| H  | -1.361564 | -1.894337 | -4.146795 |
| N  | -0.194486 | 1.067390  | -0.527084 |
| C  | 0.899410  | 1.896190  | -0.974857 |
| C  | -1.347008 | 1.650294  | -0.535126 |
| C  | -2.746342 | 0.287481  | 1.074715  |
| C  | 1.108382  | 3.138273  | -0.369681 |
| C  | 1.755871  | 1.454189  | -1.986459 |
| C  | -2.627813 | 1.169373  | -0.007276 |
| C  | -4.002052 | -0.083580 | 1.539625  |
| C  | 2.175027  | 3.939004  | -0.777451 |
| C  | 2.813156  | 2.264631  | -2.391892 |
| C  | -3.787594 | 1.693591  | -0.597597 |
| C  | -5.152615 | 0.412806  | 0.922581  |
| C  | 3.029985  | 3.504719  | -1.788046 |
| C  | -5.045068 | 1.300851  | -0.147676 |
| H  | -1.394156 | 2.648136  | -0.993630 |
| H  | -1.852833 | -0.100059 | 1.560322  |
| H  | 0.450410  | 3.467333  | 0.437752  |
| H  | 1.579090  | 0.488925  | -2.461218 |
| H  | -4.084385 | -0.763829 | 2.389438  |
| H  | 2.336274  | 4.903888  | -0.292496 |
| H  | 3.474740  | 1.921288  | -3.189805 |
| H  | -3.698231 | 2.406241  | -1.421462 |
| H  | -6.138190 | 0.113474  | 1.285765  |
| H  | 3.866974  | 4.130245  | -2.104775 |
| H  | -5.943171 | 1.699679  | -0.622773 |

\*

-----

E  
 CPCM (MeOH)  
 M06 SCF (DZ) = -1267.994950  
 G (1 atm) = -1267.600132  
 qh-G (1 mol/L) = -1267.591512  
 qh-G (24.56 mol/L) = -1267.588489  
 Lowest Frequency = 22.86

HF SCF energy (TZ) = -1260.846696  
 HF SCF energy (QZ) = -1260.921704  
 Correlation energy (DZ) = -4.711725  
 Correlation energy (TZ) = -5.750684  
 DLPNO-CCSD(T1)/CBS = -1267.302090

PBE0+D3BJ (ATZ) = -1267.926610  
 M06-2X (ATZ) = -1268.634410  
 wB97M-V (ATZ) = -1268.709277  
 B2GP-PLYP (ATZ) = -1267.968880  
 B2K-PLYP (ATZ) = -1267.804231  
 PWPB95 (ATZ) = -1268.301321  
 PWPB95+D3BJ (ATZ) = -1268.342096  
 PWPB95+D4 (ATZ) = -1268.357382

\*xyz 0 1

|    |           |           |           |
|----|-----------|-----------|-----------|
| Ru | 0.313856  | 0.224976  | 0.474590  |
| C  | 1.624952  | -0.422176 | -0.984864 |
| N  | -0.980557 | -0.204434 | -1.155951 |
| C  | 3.022474  | -0.512636 | -0.933238 |
| C  | 1.019050  | -0.772109 | -2.219969 |
| O  | 0.415426  | 2.088833  | -0.528536 |
| C  | -0.408239 | -0.615581 | -2.245832 |
| C  | -2.389247 | -0.061212 | -1.106639 |
| C  | 3.762492  | -0.956544 | -2.031257 |
| H  | 3.558994  | -0.224729 | -0.022162 |
| C  | 1.757250  | -1.208891 | -3.330223 |
| C  | 1.360391  | 2.957339  | -0.367099 |
| H  | -1.000235 | -0.814294 | -3.152227 |
| C  | -3.230882 | -1.088522 | -1.544840 |
| C  | -2.937795 | 1.114782  | -0.583938 |
| C  | 3.137588  | -1.309847 | -3.232247 |
| H  | 4.851941  | -1.026640 | -1.951563 |
| H  | 1.240728  | -1.462196 | -4.261891 |
| C  | 1.181031  | 4.186487  | -1.235347 |
| O  | 2.320358  | 2.863475  | 0.399714  |
| C  | -4.613532 | -0.930900 | -1.473447 |
| H  | -2.796730 | -2.019538 | -1.920938 |
| C  | -4.318703 | 1.265669  | -0.523684 |
| H  | -2.261703 | 1.905579  | -0.246251 |
| H  | 3.731275  | -1.653344 | -4.082724 |
| H  | 0.231598  | 4.684796  | -0.984640 |
| H  | 1.118824  | 3.896544  | -2.295189 |
| H  | 2.010694  | 4.891110  | -1.092816 |
| C  | -5.161417 | 0.244419  | -0.965686 |
| H  | -5.265598 | -1.740890 | -1.809740 |
| H  | -4.742714 | 2.191648  | -0.127147 |
| H  | -6.245916 | 0.364014  | -0.907389 |
| C  | -0.896789 | -0.944981 | 1.827915  |
| C  | 0.395152  | -1.537241 | 1.767862  |
| C  | -1.102541 | 0.403469  | 2.250540  |
| H  | -1.769806 | -1.529028 | 1.520320  |
| C  | 0.631705  | -2.984430 | 1.411061  |
| C  | 1.498979  | -0.680161 | 2.057147  |
| C  | 0.002613  | 1.239395  | 2.479126  |
| H  | -2.114440 | 0.815576  | 2.273022  |
| C  | -0.406435 | -3.558301 | 0.460197  |

E  
 CPCM (MeOH)  
 wB97X-D3 SCF (DZ) = -1268.618988  
 G (1 atm) = -1268.210789  
 qh G-E (1 mol/L) = 0.419204  
 qh G-E (24.56 mol/L) = 0.422227  
 Lowest Frequency = 7.73

HF SCF energy (TZ) = -1260.849780  
 HF SCF energy (QZ) = -1260.923445  
 Correlation energy (DZ) = -4.711580  
 Correlation energy (TZ) = -5.750353  
 DLPNO-CCSD(T1)/CBS = -1267.302987

PBE0+D3BJ (ATZ) = -1267.927146  
 M06-2X (ATZ) = -1268.645837  
 wB97M-V (ATZ) = -1268.715353  
 B2GP-PLYP (ATZ) = -1267.981722  
 B2K-PLYP (ATZ) = -1267.818308  
 PWPB95 (ATZ) = -1268.309998  
 PWPB95+D3BJ (ATZ) = -1268.350725  
 PWPB95+D4 (ATZ) = -1268.365924

SMD (MeOH)

HF SCF energy (TZ) = -1260.866166  
 HF SCF energy (QZ) = -1260.939589  
 Correlation energy (DZ) = -4.707052  
 Correlation energy (TZ) = -5.746743  
 DLPNO-CCSD(T1)/CBS = -1267.315984

\* xyz 0 1

|    |           |           |           |
|----|-----------|-----------|-----------|
| Ru | 0.301832  | 0.186173  | 0.465541  |
| C  | 1.580454  | -0.523039 | -0.988870 |
| N  | -1.010408 | -0.164247 | -1.156598 |
| C  | 2.971884  | -0.711772 | -0.940940 |
| C  | 0.957529  | -0.832655 | -2.224415 |
| C  | -0.471439 | -0.596994 | -2.247234 |
| C  | -2.414817 | 0.071222  | -1.113792 |
| C  | 3.682470  | -1.194007 | -2.043085 |
| C  | 1.660634  | -1.311047 | -3.339346 |
| C  | -3.316651 | -0.941285 | -1.447847 |
| C  | -2.880212 | 1.324755  | -0.704883 |
| C  | 3.034549  | -1.498439 | -3.246134 |
| C  | -4.688490 | -0.690363 | -1.391023 |
| C  | -4.249926 | 1.566971  | -0.655423 |
| C  | -5.158124 | 0.561724  | -0.998199 |
| C  | -0.920415 | -0.993328 | 1.783359  |
| C  | 0.373720  | -1.575470 | 1.748484  |
| C  | -1.143722 | 0.359199  | 2.198081  |
| C  | 0.624565  | -3.031404 | 1.406730  |
| C  | 1.468865  | -0.712295 | 2.065548  |
| C  | -0.050920 | 1.197647  | 2.459452  |
| C  | -0.352492 | -3.596354 | 0.376226  |
| C  | 0.619874  | -3.859321 | 2.697195  |
| C  | 1.273311  | 0.645466  | 2.380909  |
| C  | -0.230055 | 2.658880  | 2.755768  |
| H  | 3.525677  | -0.474947 | -0.027833 |
| H  | -1.077356 | -0.761159 | -3.148020 |
| H  | 4.764349  | -1.333959 | -1.964532 |
| H  | 1.128354  | -1.531099 | -4.269136 |
| H  | -2.942436 | -1.926539 | -1.735107 |
| H  | -2.154466 | 2.097514  | -0.443364 |
| H  | 3.602311  | -1.873266 | -4.100190 |
| H  | -5.391790 | -1.484935 | -1.649484 |
| H  | -4.611746 | 2.549564  | -0.344844 |

|   |           |           |           |
|---|-----------|-----------|-----------|
| C | 0.714295  | -3.809184 | 2.693026  |
| H | 1.617356  | -3.022766 | 0.907901  |
| C | 1.320224  | 0.682051  | 2.375668  |
| H | 2.514785  | -1.072381 | 1.941388  |
| C | -0.168003 | 2.698050  | 2.749802  |
| H | -0.501569 | -2.950420 | -0.454404 |
| H | -1.400983 | -3.625360 | 0.934572  |
| H | -0.123964 | -4.580600 | 0.163853  |
| H | 1.494403  | -3.428168 | 3.371843  |
| H | -0.248627 | -3.776810 | 3.232782  |
| H | 0.941382  | -4.863565 | 2.468154  |
| H | 2.186403  | 1.334860  | 2.485114  |
| H | 0.663787  | 3.268369  | 2.310906  |
| H | -0.171473 | 2.885878  | 3.836196  |
| H | -1.118130 | 3.072297  | 2.339102  |

\*

-----

|   |           |           |           |
|---|-----------|-----------|-----------|
| H | -6.232024 | 0.754637  | -0.953237 |
| H | -1.782731 | -1.583398 | 1.467707  |
| H | -2.157634 | 0.761482  | 2.202527  |
| H | 1.637274  | -3.076709 | 0.971160  |
| H | 2.487844  | -1.094950 | 1.979695  |
| H | -0.362025 | -2.988682 | -0.541035 |
| H | -1.380658 | -3.644021 | 0.769541  |
| H | -0.059007 | -4.621154 | 0.103967  |
| H | 1.361476  | -3.482662 | 3.418363  |
| H | -0.371429 | -3.819994 | 3.177882  |
| H | 0.854936  | -4.913129 | 2.483569  |
| H | 2.134244  | 1.297179  | 2.517115  |
| H | 0.574561  | 3.242502  | 2.288428  |
| H | -0.181206 | 2.824570  | 3.843091  |
| H | -1.199843 | 3.023486  | 2.391918  |
| O | 0.448036  | 2.055286  | -0.505238 |
| C | 1.374723  | 2.939495  | -0.337798 |
| C | 1.120672  | 4.227610  | -1.105081 |
| O | 2.374632  | 2.821560  | 0.377450  |
| H | 0.272484  | 4.754843  | -0.641788 |
| H | 0.844379  | 4.008395  | -2.145864 |
| H | 2.003971  | 4.877311  | -1.078003 |

\*

-----

E+

CPCM (MeOH)

|                      |              |
|----------------------|--------------|
| M06 SCF (DZ) =       | -1268.441301 |
| G (1 atm) =          | -1268.031236 |
| qh-G (1 mol/L) =     | -1268.023489 |
| qh-G (24.56 mol/L) = | -1268.020467 |
| Lowest Frequency =   | 22.26        |

|                           |              |
|---------------------------|--------------|
| HF SCF energy (TZ) =      | -1260.846696 |
| HF SCF energy (QZ) =      | -1260.921704 |
| Correlation energy (DZ) = | -4.711725    |
| Correlation energy (TZ) = | -5.750685    |
| DLPNO-CCSD(T1)/CBS =      | -1267.302090 |

\*xyz 1 1

|    |           |           |           |
|----|-----------|-----------|-----------|
| Ru | -0.313280 | 0.078288  | -0.420143 |
| C  | 0.126074  | -0.006176 | -2.543623 |
| N  | 1.328166  | -1.025761 | 0.361627  |
| C  | 0.719273  | -1.166181 | -3.274960 |
| C  | -1.278119 | 0.119055  | -2.351210 |
| C  | 0.951650  | 1.000351  | -1.952873 |
| C  | -1.141324 | -1.806251 | -0.099178 |
| O  | -0.608998 | 0.577939  | 1.687111  |
| C  | 2.634623  | -0.490185 | 0.509647  |
| C  | 1.089965  | -2.260727 | 0.675886  |
| H  | 1.699674  | -1.435711 | -2.852072 |
| H  | 0.869798  | -0.921611 | -4.338690 |
| H  | 0.059751  | -2.045276 | -3.219204 |
| C  | -1.830186 | 1.169313  | -1.575601 |
| H  | -1.934433 | -0.668184 | -2.733080 |
| C  | 0.418140  | 2.085221  | -1.225302 |
| H  | 2.039457  | 0.887899  | -2.013941 |
| C  | -0.239245 | -2.758748 | 0.442834  |
| C  | -2.442917 | -2.256533 | -0.356254 |
| C  | -1.627028 | 0.531600  | 2.385383  |
| C  | 3.741733  | -1.171139 | -0.004772 |
| C  | 2.801537  | 0.747000  | 1.139364  |
| H  | 1.878206  | -2.890315 | 1.113757  |
| C  | -0.978411 | 2.145641  | -0.980221 |
| H  | -2.906855 | 1.202331  | -1.385539 |
| H  | 1.096668  | 2.801552  | -0.759248 |

E+

CPCM (MeOH)

|                        |              |
|------------------------|--------------|
| wB97X-D3 SCF (DZ) =    | -1269.072786 |
| G (1 atm) =            | -1268.651014 |
| qh G-E (1 mol/L) =     | 0.432851     |
| qh G-E (24.56 mol/L) = | 0.435873     |
| Lowest Frequency =     | 10.79        |

|                           |              |
|---------------------------|--------------|
| HF SCF energy (TZ) =      | -1261.312142 |
| HF SCF energy (QZ) =      | -1261.385289 |
| Correlation energy (DZ) = | -4.705054    |
| Correlation energy (TZ) = | -5.739564    |
| DLPNO-CCSD(T1)/CBS =      | -1267.751395 |

SMD (MeOH)

|                           |              |
|---------------------------|--------------|
| HF SCF energy (TZ) =      | -1261.327085 |
| HF SCF energy (QZ) =      | -1261.400192 |
| Correlation energy (DZ) = | -4.702289    |
| Correlation energy (TZ) = | -5.737377    |
| DLPNO-CCSD(T1)/CBS =      | -1267.764435 |

\*xyz 1 1

|    |           |           |           |
|----|-----------|-----------|-----------|
| Ru | -0.398494 | -0.008555 | -0.434807 |
| C  | -0.239089 | -0.170552 | -2.598032 |
| N  | 1.299085  | -0.944186 | 0.407583  |
| C  | 0.092208  | -1.380868 | -3.423945 |
| C  | -1.584016 | 0.158230  | -2.249916 |
| C  | 0.775089  | 0.691590  | -2.101634 |
| C  | -1.074989 | -1.944108 | -0.107209 |
| C  | 2.555023  | -0.290591 | 0.589013  |
| C  | 1.166089  | -2.181485 | 0.750325  |
| C  | -1.879486 | 1.272708  | -1.437895 |
| C  | 0.486878  | 1.867377  | -1.347114 |
| C  | -0.116601 | -2.802738 | 0.487745  |
| C  | -2.325664 | -2.515684 | -0.384129 |
| C  | 3.710491  | -0.809791 | 0.001873  |
| C  | 2.606866  | 0.895289  | 1.325961  |
| C  | -0.838820 | 2.148045  | -0.976112 |
| C  | -0.376895 | -4.145395 | 0.786755  |
| C  | -2.596319 | -3.857299 | -0.092247 |
| C  | 4.924584  | -0.141274 | 0.164625  |



|   |           |           |           |
|---|-----------|-----------|-----------|
| C | -0.613536 | -4.079533 | 0.717223  |
| C | -2.822585 | -3.576058 | -0.082665 |
| H | -3.194983 | -1.581147 | -0.783840 |
| C | -1.710856 | 1.203736  | 3.704398  |
| O | -2.727323 | -0.078968 | 2.013643  |
| C | 5.014175  | -0.619534 | 0.126575  |
| H | 3.598391  | -2.120277 | -0.529095 |
| C | 4.076565  | 1.285701  | 1.270294  |
| H | 1.925339  | 1.266741  | 1.536542  |
| C | -1.600083 | 3.210922  | -0.109155 |
| C | -1.914962 | -4.489860 | 0.452774  |
| H | 0.118712  | -4.777479 | 1.134755  |
| H | -3.846457 | -3.893868 | -0.298929 |
| H | -2.209044 | 0.553528  | 4.435197  |
| H | -2.331533 | 2.107099  | 3.590181  |
| H | -0.712857 | 1.494428  | 4.048866  |
| H | -2.560005 | -0.545513 | 1.163572  |
| C | 5.185656  | 0.606591  | 0.764089  |
| H | 5.875902  | -1.151368 | -0.283735 |
| H | 4.205638  | 2.246862  | 1.773602  |
| C | -0.646616 | 3.836482  | 0.896289  |
| C | -2.204438 | 4.280747  | -1.019143 |
| H | -2.428279 | 2.722448  | 0.441139  |
| H | -2.223693 | -5.516830 | 0.658689  |
| H | 6.184169  | 1.038899  | 0.861520  |
| H | -0.150174 | 3.081070  | 1.526343  |
| H | 0.131456  | 4.435877  | 0.393863  |
| H | -1.200995 | 4.520532  | 1.557180  |
| H | -2.945690 | 3.859552  | -1.715961 |
| H | -1.413270 | 4.767363  | -1.614923 |
| H | -2.701690 | 5.056675  | -0.416853 |

\*

-----

|   |           |           |           |
|---|-----------|-----------|-----------|
| C | 3.822749  | 1.553476  | 1.485405  |
| C | -1.214705 | 3.332487  | -0.106718 |
| C | -1.628404 | -4.677476 | 0.492088  |
| C | 4.984129  | 1.038501  | 0.904558  |
| C | -0.153358 | 3.714908  | 0.922948  |
| C | -1.564356 | 4.511453  | -1.025483 |
| H | 1.086548  | -1.767810 | -3.162472 |
| H | 0.095915  | -1.116534 | -4.492179 |
| H | -0.649841 | -2.175590 | -3.268274 |
| H | -2.392556 | -0.510109 | -2.550333 |
| H | 1.820128  | 0.424595  | -2.275121 |
| H | 1.993902  | -2.724565 | 1.224047  |
| H | -2.912510 | 1.462054  | -1.141177 |
| H | 1.311088  | 2.481614  | -0.985944 |
| H | -3.119742 | -1.920591 | -0.847160 |
| H | 3.651678  | -1.722754 | -0.595110 |
| H | 1.692031  | 1.287248  | 1.773040  |
| H | 0.399778  | -4.764209 | 1.244027  |
| H | -3.580735 | -4.268347 | -0.330972 |
| H | 5.827482  | -0.546231 | -0.297122 |
| H | 3.862006  | 2.476672  | 2.067410  |
| H | -2.130058 | 3.043330  | 0.436975  |
| H | -1.851094 | -5.723007 | 0.713165  |
| H | 5.935344  | 1.560838  | 1.025456  |
| H | 0.076858  | 2.871658  | 1.589723  |
| H | 0.781494  | 4.049923  | 0.447003  |
| H | -0.521023 | 4.546235  | 1.541966  |
| H | -2.356791 | 4.243093  | -1.740385 |
| H | -0.679454 | 4.830715  | -1.599189 |
| H | -1.914446 | 5.367222  | -0.429554 |
| O | -0.800378 | 0.420658  | 1.647020  |
| C | -1.872492 | 0.436853  | 2.260938  |
| C | -1.981454 | 0.967420  | 3.647032  |
| O | -3.001942 | 0.019507  | 1.736891  |
| H | -2.637291 | 0.327079  | 4.249390  |
| H | -2.439768 | 1.966430  | 3.588646  |
| H | -0.986431 | 1.049762  | 4.094869  |
| H | -2.827386 | -0.319013 | 0.835891  |

\*

-----

#### E•S

CPCM (MeOH)  
wB97X-D3 SCF (DZ) = -1384.330915  
G (1 atm) = -1383.872643  
qh G-E (1 mol/L) = 0.470491  
qh G-E (24.56 mol/L) = 0.473514  
Lowest Frequencies = 7.73

HF SCF energy (TZ) = -1375.937311  
HF SCF energy (QZ) = -1376.019293  
Correlation energy (DZ) = -5.097822  
Correlation energy (TZ) = -6.228596  
DLPNO-CCSD(T1)/CBS = -1382.933343

#### SMD (MeOH)

HF SCF energy (TZ) = -1375.952054  
HF SCF energy (QZ) = -1376.033840  
Correlation energy (DZ) = -5.093118  
Correlation energy (TZ) = -6.224699  
DLPNO-CCSD(T1)/CBS = -1382.944407

\* xyz 0 1

|    |          |          |           |
|----|----------|----------|-----------|
| Ru | 0.439587 | 0.244849 | -0.466760 |
| C  | 1.668410 | 1.177747 | 0.902659  |

|   |           |           |           |
|---|-----------|-----------|-----------|
| N | -0.676975 | 0.074772  | 1.338212  |
| C | 1.212146  | 1.120644  | 2.241756  |
| C | 2.874295  | 1.868522  | 0.695293  |
| C | -2.007261 | -0.428215 | 1.441500  |
| C | -0.079183 | 0.489987  | 2.406886  |
| C | 1.916178  | 1.684443  | 3.317169  |
| C | 3.574230  | 2.449670  | 1.753197  |
| C | -2.352114 | -1.615807 | 0.789844  |
| C | -2.976373 | 0.286536  | 2.153420  |
| C | 3.107290  | 2.354307  | 3.070628  |
| C | -3.656472 | -2.095588 | 0.877436  |
| C | -4.281261 | -0.200316 | 2.231757  |
| C | -4.624937 | -1.393286 | 1.597939  |
| C | 0.488629  | 1.993236  | -1.707036 |
| C | 1.340139  | 1.013637  | -2.306121 |
| C | -0.868442 | 1.708854  | -1.413973 |
| C | 0.842901  | -0.279367 | -2.581705 |
| C | -1.815211 | 2.720601  | -0.795194 |
| C | -1.365602 | 0.410132  | -1.770801 |
| C | 1.735171  | -1.364150 | -3.114585 |
| C | -0.543403 | -0.561925 | -2.346589 |
| C | -1.144807 | 3.680571  | 0.185776  |
| C | -2.537846 | 3.475448  | -1.917839 |
| H | 3.291690  | 1.954951  | -0.312156 |
| H | -0.553392 | 0.388366  | 3.391556  |
| H | 1.519690  | 1.603421  | 4.333116  |
| H | 4.505615  | 2.985937  | 1.550756  |
| H | -1.603689 | -2.156311 | 0.206843  |
| H | -2.713143 | 1.237498  | 2.622364  |
| H | 3.667908  | 2.808771  | 3.889929  |
| H | -3.918812 | -3.026906 | 0.370589  |
| H | -5.034112 | 0.366048  | 2.784223  |
| H | -5.648137 | -1.770427 | 1.654761  |
| H | 0.913820  | 2.955037  | -1.418622 |
| H | 2.392435  | 1.238884  | -2.482862 |
| H | -2.567985 | 2.138111  | -0.236573 |
| H | -2.394233 | 0.151029  | -1.508383 |
| H | 2.792182  | -1.154457 | -2.905814 |
| H | 1.607090  | -1.434462 | -4.205781 |
| H | 1.461934  | -2.334671 | -2.678536 |
| H | -0.918817 | -1.573142 | -2.507817 |
| H | -0.626889 | 3.137014  | 0.990151  |
| H | -0.411701 | 4.331976  | -0.316100 |
| H | -1.902255 | 4.333465  | 0.644446  |
| H | -3.057242 | 2.782655  | -2.597550 |
| H | -1.821564 | 4.064184  | -2.514107 |
| H | -3.284931 | 4.167750  | -1.500947 |
| O | 1.205933  | -1.670352 | 0.119079  |
| C | 2.383745  | -2.222569 | 0.193506  |
| C | 3.612567  | -1.338893 | 0.160013  |
| O | 2.506726  | -3.443905 | 0.306265  |
| H | 3.536401  | -0.574549 | -0.623997 |
| H | 4.504381  | -1.957488 | 0.004197  |
| H | 3.704725  | -0.809737 | 1.119656  |
| O | -0.365101 | -3.483540 | -1.196947 |
| C | -0.461564 | -4.731985 | -0.541621 |
| H | 0.218879  | -2.903329 | -0.656955 |
| H | -0.898549 | -5.458570 | -1.242861 |
| H | 0.526927  | -5.096135 | -0.217899 |
| H | -1.117742 | -4.681722 | 0.348762  |

\*

-----  
**E•S<sub>2</sub>**  
 CPCM (MeOH)  
 wB97X-D3 SCF (DZ) = -1500.043858

G (1 atm) = -1499.536104  
qh G-E (1 mol/L) = 0.521804  
qh G-E (24.56 mol/L) = 0.524827  
Lowest Frequencies = 7.73

SMD (MeOH)  
HF SCF energy (TZ) = -1491.047108  
HF SCF energy (QZ) = -1491.136739  
Correlation energy (DZ) = -5.475863  
Correlation energy (TZ) = -6.700137  
DLPNO-CCSD(T1)/CBS = -1498.579269

\* xyz 0 1  
Ru 0.597491 0.135510 -0.716077  
C 1.741177 0.925769 0.810334  
C 2.968818 1.603239 0.746403  
C 1.221808 0.703659 2.109230  
C 3.628377 2.027735 1.902937  
C 1.879524 1.113365 3.277471  
C -0.061145 0.034766 2.132873  
C 3.093549 1.782131 3.172745  
N -0.582014 -0.287929 0.994778  
C -1.889707 -0.856796 0.963451  
C -2.933842 -0.250355 1.668164  
C -2.133800 -1.995852 0.189779  
C -4.216766 -0.795550 1.616636  
C -3.416257 -2.535082 0.149283  
C -4.461512 -1.939471 0.859444  
C 0.604721 2.017809 -1.747097  
C 1.506468 1.156551 -2.443689  
C -0.745833 1.647430 -1.528045  
C 1.072461 -0.108989 -2.892503  
C -1.751795 2.541390 -0.827800  
C -1.174201 0.378590 -2.041561  
C 2.006471 -1.060681 -3.582641  
C -0.297333 -0.485508 -2.705150  
C -1.164717 3.362974 0.318263  
C -2.429819 3.439077 -1.870121  
H 3.433185 1.809003 -0.222547  
H 4.580330 2.558664 1.814011  
H 1.436332 0.907394 4.255784  
H -0.583985 -0.182219 3.072996  
H 3.623183 2.113710 4.068098  
H -2.745175 0.663327 2.236586  
H -1.318468 -2.465354 -0.361556  
H -5.029183 -0.312319 2.163553  
H -3.601374 -3.431257 -0.446821  
H -5.466459 -2.364440 0.814601  
H 0.983648 2.956243 -1.340945  
H 2.548904 1.449724 -2.574914  
H -2.519132 1.870093 -0.406196  
H -2.193960 0.046816 -1.833247  
H 1.855457 -2.083594 -3.211520  
H 1.780542 -1.056464 -4.660203  
H 3.055147 -0.768986 -3.449784  
H -0.628992 -1.477645 -3.012976  
H -1.966832 3.921393 0.823433  
H -0.428288 4.099305 -0.041117  
H -0.671695 2.721846 1.063812  
H -2.885463 2.845000 -2.676958  
H -1.698271 4.127310 -2.324423  
H -3.222008 4.042278 -1.401412  
O 1.529228 -1.736440 -0.184565  
C 2.764401 -1.926792 0.224137  
C 3.883056 -1.421370 -0.658759  
O 3.012548 -2.564342 1.242858

|   |           |           |           |
|---|-----------|-----------|-----------|
| H | 3.643367  | -0.450430 | -1.106140 |
| H | 4.020453  | -2.147199 | -1.476083 |
| H | 4.816928  | -1.359518 | -0.087122 |
| O | 0.170303  | -3.681763 | 1.432429  |
| C | 0.092190  | -3.366068 | 2.802393  |
| H | 0.671146  | -2.968048 | 0.991209  |
| H | -0.131109 | -4.287111 | 3.363073  |
| H | 1.041360  | -2.950069 | 3.183885  |
| H | -0.716627 | -2.640764 | 3.019264  |
| O | 0.330739  | -3.529623 | -1.900519 |
| C | 0.883173  | -4.793721 | -1.578082 |
| H | 0.751735  | -2.874340 | -1.307909 |
| H | 1.953052  | -4.858247 | -1.849618 |
| H | 0.341335  | -5.558816 | -2.153320 |
| H | 0.778586  | -5.019248 | -0.503741 |

\*

### F

CPCM (MeOH)

|                      |              |
|----------------------|--------------|
| M06 SCF (DZ) =       | -1107.746206 |
| G (1 atm) =          | -1107.494428 |
| qh-G (1 mol/L) =     | -1107.486330 |
| qh-G (24.56 mol/L) = | -1107.483307 |
| Lowest Frequency =   | 22.62        |

|                           |              |
|---------------------------|--------------|
| HF SCF energy (TZ) =      | -1101.839189 |
| HF SCF energy (QZ) =      | -1101.906698 |
| Correlation energy (DZ) = | -3.774798    |
| Correlation energy (TZ) = | -4.687417    |
| DLPNO-CCSD(T1)/CBS =      | -1107.147733 |

\*xyz 0 1

|    |           |           |           |
|----|-----------|-----------|-----------|
| Ru | -0.269489 | 0.914599  | 0.933559  |
| N  | -0.259882 | -0.350453 | -0.583596 |
| O  | -1.901706 | -0.115676 | 1.870376  |
| C  | -1.575157 | -0.640029 | -1.091994 |
| C  | 0.702535  | -1.023764 | -1.149999 |
| O  | 1.340339  | 2.049246  | 0.066117  |
| O  | 0.143766  | -0.709336 | 2.273922  |
| O  | -0.718620 | 2.624732  | -0.281980 |
| C  | -1.098770 | -0.894971 | 2.469755  |
| C  | -2.327377 | 0.356023  | -1.714842 |
| C  | -2.092142 | -1.927674 | -0.941648 |
| C  | 2.119730  | -1.097850 | -0.834976 |
| H  | 0.402738  | -1.639849 | -2.011188 |
| C  | 0.518677  | 2.855736  | -0.465693 |
| C  | -1.592621 | -2.002008 | 3.334431  |
| C  | -3.597034 | 0.050864  | -2.196495 |
| H  | -1.907453 | 1.359510  | -1.807987 |
| C  | -3.367737 | -2.220396 | -1.418708 |
| H  | -1.492720 | -2.690070 | -0.434787 |
| C  | 2.730135  | -0.593381 | 0.326261  |
| C  | 2.918887  | -1.776229 | -1.774823 |
| C  | 0.981700  | 4.039239  | -1.242126 |
| H  | -2.527981 | -1.713908 | 3.831819  |
| H  | -1.804560 | -2.878011 | 2.700673  |
| H  | -0.833453 | -2.287704 | 4.073522  |
| C  | -4.122074 | -1.233321 | -2.048711 |
| H  | -4.183943 | 0.827636  | -2.693248 |
| H  | -3.773147 | -3.227518 | -1.293602 |
| C  | 4.095048  | -0.758189 | 0.524608  |
| H  | 2.122239  | -0.078050 | 1.070911  |
| C  | 4.284553  | -1.929770 | -1.576671 |
| H  | 2.451517  | -2.184243 | -2.676341 |
| H  | 1.936451  | 3.823984  | -1.739200 |

### F

CPCM (MeOH)

|                        |              |
|------------------------|--------------|
| wB97X-D3 SCF (DZ) =    | -1108.208048 |
| G (1 atm) =            | -1107.946166 |
| qh G-E (1 mol/L) =     | 0.273302     |
| qh G-E (24.56 mol/L) = | 0.276325     |
| Lowest Frequency =     | 14.21        |

|                           |              |
|---------------------------|--------------|
| HF SCF energy (TZ) =      | -1101.844987 |
| HF SCF energy (QZ) =      | -1101.911849 |
| Correlation energy (DZ) = | -3.770871    |
| Correlation energy (TZ) = | -4.682115    |
| DLPNO-CCSD(T1)/CBS =      | -1107.146580 |

SMD (MeOH)

|                           |              |
|---------------------------|--------------|
| HF SCF energy (TZ) =      | -1101.856541 |
| HF SCF energy (QZ) =      | -1101.923213 |
| Correlation energy (DZ) = | -3.765024    |
| Correlation energy (TZ) = | -4.677340    |
| DLPNO-CCSD(T1)/CBS =      | -1107.153740 |

\* xyz 0 1

|    |           |           |           |
|----|-----------|-----------|-----------|
| Ru | -0.216051 | 0.860766  | 0.911808  |
| N  | -0.282885 | -0.462760 | -0.599876 |
| O  | -1.933526 | -0.020156 | 1.872096  |
| C  | -1.615723 | -0.753640 | -1.071142 |
| C  | 0.667890  | -1.080338 | -1.216924 |
| O  | 1.488218  | 1.868064  | 0.061987  |
| O  | 0.059783  | -0.712227 | 2.368028  |
| O  | -0.519004 | 2.555505  | -0.382487 |
| C  | -1.197947 | -0.813122 | 2.538406  |
| C  | -2.346248 | 0.230503  | -1.736125 |
| C  | -2.162004 | -2.014000 | -0.831560 |
| C  | 2.102043  | -1.066401 | -0.898153 |
| H  | 0.381320  | -1.679907 | -2.091308 |
| C  | 0.737019  | 2.693603  | -0.544069 |
| C  | -1.783534 | -1.845771 | 3.448037  |
| C  | -3.636848 | -0.060546 | -2.172542 |
| H  | -1.898144 | 1.211866  | -1.898179 |
| C  | -3.457043 | -2.293123 | -1.267333 |
| H  | -1.576713 | -2.762231 | -0.292193 |
| C  | 2.598153  | -1.036855 | 0.412132  |
| C  | 2.996182  | -1.160802 | -1.974547 |
| C  | 1.304822  | 3.791593  | -1.386197 |
| H  | -2.714228 | -1.475239 | 3.894687  |
| H  | -2.023099 | -2.735759 | 2.845706  |
| H  | -1.062967 | -2.130030 | 4.223865  |
| C  | -4.195433 | -1.318882 | -1.938500 |

|   |           |           |           |
|---|-----------|-----------|-----------|
| H | 1.143596  | 4.878996  | -0.548133 |
| H | 0.223906  | 4.343214  | -1.975338 |
| H | -5.122426 | -1.463072 | -2.423574 |
| C | 4.877602  | -1.419385 | -0.422848 |
| H | 4.556912  | -0.365923 | 1.434110  |
| H | 4.887947  | -2.453653 | -2.321677 |
| H | 5.951114  | -1.541614 | -0.258002 |

\*

-----

**F\***

CPCM (MeOH)  
M06 SCF (DZ) = -1107.740132  
G (1 atm) = -1107.490631  
qh-G (1 mol/L) = -1107.481454  
qh-G (24.56 mol/L) = -1107.478431  
Lowest Frequency = 21.17

HF SCF energy (TZ) = -1101.841709  
HF SCF energy (QZ) = -1101.908350  
Correlation energy (DZ) = -3.770337  
Correlation energy (TZ) = -4.681250  
DLPNO-CCSD(T1)/CBS = -1107.141958

\*xyz 0 1

|    |           |           |           |
|----|-----------|-----------|-----------|
| Ru | -0.304015 | 1.091981  | 0.153767  |
| N  | -0.600305 | -0.837508 | -0.430589 |
| O  | -0.961183 | 0.366982  | 2.076785  |
| O  | 1.124257  | 0.571649  | 1.545361  |
| O  | 0.672529  | 2.156613  | -1.406880 |
| O  | 0.162484  | 3.196315  | 0.438576  |
| C  | -2.007728 | -1.083973 | -0.518073 |
| C  | 0.170455  | -1.870283 | -0.588689 |
| C  | 0.250199  | 0.225515  | 2.412444  |
| C  | 0.676244  | 3.232870  | -0.717440 |
| C  | -2.646881 | -1.926797 | 0.393399  |
| C  | -2.742430 | -0.441987 | -1.518027 |
| C  | 1.623876  | -1.908936 | -0.617506 |
| H  | -0.325218 | -2.839436 | -0.759535 |
| C  | 0.661872  | -0.338287 | 3.724593  |
| C  | 1.265233  | 4.480230  | -1.280461 |
| C  | -4.022296 | -2.121935 | 0.301397  |
| H  | -2.059681 | -2.407157 | 1.180644  |
| C  | -4.117361 | -0.643291 | -1.601722 |
| H  | -2.222602 | 0.199304  | -2.236555 |
| C  | 2.229274  | -3.174995 | -0.539730 |
| C  | 2.436280  | -0.774935 | -0.783667 |
| H  | -0.153803 | -0.253096 | 4.453183  |
| H  | 0.905859  | -1.404211 | 3.593353  |
| H  | 1.563468  | 0.168268  | 4.093852  |
| H  | 2.287050  | 4.280468  | -1.634257 |
| H  | 1.275530  | 5.281856  | -0.532372 |
| H  | 0.677238  | 4.801014  | -2.153565 |
| C  | -4.760889 | -1.482050 | -0.692925 |
| H  | -4.522043 | -2.778218 | 1.018268  |
| H  | -4.687687 | -0.145734 | -2.389902 |
| C  | 3.611488  | -3.306298 | -0.588733 |
| H  | 1.598274  | -4.062801 | -0.433385 |
| C  | 3.816491  | -0.913893 | -0.850521 |
| H  | 1.974546  | 0.211449  | -0.871445 |

|   |           |           |           |
|---|-----------|-----------|-----------|
| H | -4.210407 | 0.704196  | -2.700391 |
| H | -3.888837 | -3.278265 | -1.078624 |
| C | 3.972417  | -1.063626 | 0.632773  |
| H | 1.905772  | -1.020145 | 1.253727  |
| C | 4.370110  | -1.167617 | -1.749372 |
| H | 2.607934  | -1.217214 | -2.994715 |
| H | 2.204344  | 3.438320  | -1.905261 |
| H | 1.594053  | 4.623293  | -0.726446 |
| H | 0.559065  | 4.152241  | -2.103701 |
| H | -5.210322 | -1.538827 | -2.276224 |
| C | 4.859859  | -1.116407 | -0.443688 |
| H | 4.354778  | -1.045666 | 1.655485  |
| H | 5.059645  | -1.224828 | -2.593942 |
| H | 5.937094  | -1.131997 | -0.263208 |

\*

-----

**F\***

CPCM (MeOH)  
wB97X-D3 SCF (DZ) = -1108.204259  
G (1 atm) = -1107.943608  
qh G-E (1 mol/L) = 0.270931  
qh G-E (24.56 mol/L) = 0.273953  
Lowest Frequency = 5.75

HF SCF energy (TZ) = -1101.844579  
HF SCF energy (QZ) = -1101.911009  
Correlation energy (DZ) = -3.769567  
Correlation energy (TZ) = -4.680407  
DLPNO-CCSD(T1)/CBS = -1107.143670

SMD (MeOH)

HF SCF energy (TZ) = -1101.855977  
HF SCF energy (QZ) = -1101.922220  
Correlation energy (DZ) = -3.763217  
Correlation energy (TZ) = -4.675170  
DLPNO-CCSD(T1)/CBS = -1107.150236

\* xyz 0 1

|    |           |           |           |
|----|-----------|-----------|-----------|
| Ru | -0.281227 | -0.790363 | -0.633892 |
| N  | 0.941213  | 0.846385  | -0.830999 |
| O  | -0.787429 | -0.432401 | -2.690936 |
| O  | 0.687948  | -1.889697 | -2.080877 |
| O  | 0.104625  | -1.656798 | 1.258878  |
| O  | -1.450920 | -2.507528 | -0.006815 |
| C  | 0.093835  | 2.004092  | -0.805152 |
| C  | 2.191902  | 1.040123  | -1.068791 |
| C  | 0.068037  | -1.302073 | -3.031914 |
| C  | -0.809045 | -2.535469 | 1.085970  |
| C  | -0.065737 | 2.803899  | -1.938347 |
| C  | -0.621937 | 2.274276  | 0.364456  |
| C  | 3.244810  | 0.020173  | -1.110723 |
| H  | 2.520592  | 2.072201  | -1.254030 |
| C  | 0.385168  | -1.608496 | -4.458207 |
| C  | -1.118328 | -3.532391 | 2.157850  |
| C  | -0.941775 | 3.886140  | -1.892938 |
| H  | 0.481943  | 2.561943  | -2.851368 |
| C  | -1.498320 | 3.358789  | 0.397420  |
| H  | -0.470366 | 1.651288  | 1.250807  |
| C  | 4.414756  | 0.341440  | -1.815484 |
| C  | 3.154942  | -1.213267 | -0.448114 |
| H  | -0.457167 | -1.335915 | -5.104476 |
| H  | 1.264416  | -1.014073 | -4.750107 |
| H  | 0.634406  | -2.670714 | -4.572004 |
| H  | -0.209497 | -3.780684 | 2.719526  |
| H  | -1.566111 | -4.434314 | 1.724319  |
| H  | -1.841781 | -3.081945 | 2.854511  |

|   |           |           |           |
|---|-----------|-----------|-----------|
| H | -5.840163 | -1.637926 | -0.760282 |
| C | 4.408966  | -2.173393 | -0.743835 |
| H | 4.068405  | -4.295893 | -0.514354 |
| H | 4.441684  | -0.028227 | -0.988534 |
| H | 5.496464  | -2.272097 | -0.790501 |

\*

-----

**F•A**

CPCM (MeOH)

|                      |              |
|----------------------|--------------|
| M06 SCF (DZ) =       | -1664.109143 |
| G (1 atm) =          | -1663.667688 |
| qh-G (1 mol/L) =     | -1663.656956 |
| qh-G (24.56 mol/L) = | -1663.653934 |
| Lowest Frequency =   | 21.43        |

|                           |              |
|---------------------------|--------------|
| HF SCF energy (TZ) =      | -1655.136388 |
| HF SCF energy (QZ) =      | -1655.235195 |
| Correlation energy (DZ) = | -5.837156    |
| Correlation energy (TZ) = | -7.146596    |
| DLPNO-CCSD(T1)/CBS =      | -1663.168096 |

\*xyz 0 1

|    |           |           |           |
|----|-----------|-----------|-----------|
| Ru | -0.381062 | -0.411227 | 0.160683  |
| N  | -1.375709 | 1.382681  | -0.187429 |
| N  | 2.398526  | -1.279680 | 0.823363  |
| C  | -0.690518 | 2.545116  | 0.304196  |
| C  | -2.554401 | 1.613135  | -0.679076 |
| O  | -1.846182 | -0.777082 | 1.684064  |
| O  | 1.028516  | 0.067815  | -1.397450 |
| O  | -0.837027 | -0.902441 | -1.893768 |
| O  | -0.059942 | 0.353416  | 2.132330  |
| C  | 1.206690  | -1.997762 | 1.035881  |
| C  | 3.102478  | -1.496151 | -0.221851 |
| C  | 0.583426  | 2.870034  | -0.165929 |
| C  | -1.297708 | 3.331916  | 1.285966  |
| C  | -3.592039 | 0.698064  | -1.135912 |
| H  | -2.837325 | 2.674202  | -0.774322 |
| C  | -1.165916 | -0.123971 | 2.533406  |
| C  | 0.248810  | -0.382367 | -2.292937 |
| C  | 0.926626  | -2.337862 | 2.396177  |
| C  | 0.401528  | -2.584328 | 0.022809  |
| C  | 4.282147  | -0.692144 | -0.544549 |
| H  | 2.859943  | -2.295630 | -0.950799 |
| C  | 1.231798  | 3.994411  | 0.335725  |
| H  | 1.051628  | 2.233334  | -0.919193 |
| C  | -0.636420 | 4.450173  | 1.788416  |
| H  | -2.279898 | 3.043796  | 1.673334  |
| C  | -3.608875 | -0.694617 | -0.944254 |
| C  | -4.684104 | 1.301782  | -1.786210 |
| C  | -1.623910 | 0.066019  | 3.936819  |
| C  | 0.600731  | -0.295259 | -3.737071 |
| C  | -0.075253 | -3.216816 | 2.716170  |
| H  | 1.562584  | -1.893387 | 3.166610  |
| C  | -0.626240 | -3.500390 | 0.385890  |
| H  | 0.726653  | -2.573756 | -1.019970 |
| C  | 4.630018  | 0.429614  | 0.222558  |
| C  | 5.067461  | -1.032869 | -1.652494 |
| C  | 0.628572  | 4.786861  | 1.312869  |
| H  | 2.225385  | 4.251810  | -0.040592 |

|   |           |           |           |
|---|-----------|-----------|-----------|
| C | -1.659741 | 4.165454  | -0.728835 |
| H | -1.068437 | 4.512282  | -2.778596 |
| H | -2.051396 | 3.576877  | 1.313169  |
| C | 5.462139  | -0.571840 | -1.898282 |
| H | 4.495612  | 1.313545  | -2.308787 |
| C | 4.212930  | -2.114075 | -0.516026 |
| H | 2.262013  | -1.460505 | 0.128272  |
| H | -2.345319 | 5.014710  | -0.700144 |
| C | 5.360950  | -1.802090 | -1.248270 |
| H | 6.361567  | -0.319090 | -2.463315 |
| H | 4.142123  | -3.070332 | 0.006407  |
| H | 6.184216  | -2.517848 | -1.304165 |

\*

-----

**F•A**

CPCM (MeOH)

|                        |              |
|------------------------|--------------|
| wB97X-D3 SCF (DZ) =    | -1664.884297 |
| G (1 atm) =            | -1664.426995 |
| qh G-E (1 mol/L) =     | 0.471486     |
| qh G-E (24.56 mol/L) = | 0.474509     |
| Lowest Frequency =     | 16.69        |

|                           |              |
|---------------------------|--------------|
| HF SCF energy (TZ) =      | -1655.150380 |
| HF SCF energy (QZ) =      | -1655.249005 |
| Correlation energy (DZ) = | -5.832736    |
| Correlation energy (TZ) = | -7.142223    |
| DLPNO-CCSD(T1)/CBS =      | -1663.186125 |

SMD (MeOH)

|                           |              |
|---------------------------|--------------|
| HF SCF energy (TZ) =      | -1655.167649 |
| HF SCF energy (QZ) =      | -1655.266123 |
| Correlation energy (DZ) = | -5.826426    |
| Correlation energy (TZ) = | -7.137156    |
| DLPNO-CCSD(T1)/CBS =      | -1663.198857 |

\* xyz 0 1

|    |           |           |           |
|----|-----------|-----------|-----------|
| Ru | 0.019646  | -1.358928 | -0.160150 |
| N  | -1.272689 | 0.074633  | -0.957331 |
| C  | -0.595596 | 1.193353  | -1.566592 |
| C  | -2.559334 | 0.139063  | -0.983062 |
| C  | -0.675869 | 1.368896  | -2.948230 |
| C  | 0.153303  | 2.070610  | -0.781162 |
| C  | -3.520374 | -0.874780 | -0.527883 |
| C  | 0.003146  | 2.428398  | -3.549942 |
| C  | 0.818065  | 3.133198  | -1.390529 |
| C  | -3.268843 | -2.253080 | -0.561283 |
| C  | -4.764383 | -0.410979 | -0.075984 |
| C  | 0.752592  | 3.311668  | -2.773814 |
| C  | -4.238674 | -3.146162 | -0.117169 |
| C  | -5.724892 | -1.306771 | 0.386922  |
| C  | -5.461111 | -2.676473 | 0.368348  |
| H  | -3.006691 | 1.063752  | -1.375060 |
| H  | -1.256338 | 0.664301  | -3.548325 |
| H  | 0.211112  | 1.907343  | 0.295326  |
| H  | -0.053765 | 2.558900  | -4.632684 |
| H  | 1.397883  | 3.825490  | -0.775743 |
| H  | -2.316587 | -2.620062 | -0.943510 |
| H  | -4.972122 | 0.662266  | -0.074570 |
| H  | 1.284200  | 4.140608  | -3.245847 |
| H  | -4.038259 | -4.219207 | -0.147223 |
| H  | -6.682985 | -0.935258 | 0.755882  |
| H  | -6.215008 | -3.382805 | 0.723318  |
| N  | 3.359189  | -0.864194 | 2.012662  |
| C  | 2.409292  | -1.897289 | 1.890807  |
| C  | 3.350344  | 0.054429  | 1.122202  |
| C  | 1.882858  | -2.444164 | 3.043092  |

|   |           |           |           |
|---|-----------|-----------|-----------|
| H | -1.113303 | 5.056037  | 2.562950  |
| C | -4.682674 | -1.446914 | -1.401068 |
| H | -2.778619 | -1.180687 | -0.431150 |
| C | -5.750961 | 0.543782  | -2.251345 |
| H | -4.687290 | 2.386937  | -1.927346 |
| H | -0.998516 | -0.551277 | 4.601264  |
| H | -1.487457 | 1.114885  | 4.237405  |
| H | -2.673439 | -0.230275 | 4.054502  |
| H | -0.051508 | -0.938011 | -4.340648 |
| H | 1.653795  | -0.575762 | -3.881982 |
| H | 0.488211  | 0.746550  | -4.074427 |
| C | -0.871703 | -3.803580 | 1.701307  |
| H | -0.255828 | -3.475135 | 3.763535  |
| H | -1.210681 | -3.970800 | -0.410766 |
| C | 5.744015  | 1.187544  | -0.112351 |
| H | 4.004605  | 0.691247  | 1.079903  |
| C | 6.185196  | -0.272902 | -1.986675 |
| H | 4.793104  | -1.904603 | -2.255453 |
| H | 1.148732  | 5.662815  | 1.708000  |
| C | -5.751953 | -0.836162 | -2.058197 |
| H | -4.687113 | -2.528045 | -1.241376 |
| H | -6.586175 | 1.031051  | -2.759460 |
| H | -1.667532 | -4.502816 | 1.969045  |
| C | 6.525301  | 0.837828  | -1.217050 |
| H | 6.008875  | 2.061957  | 0.487784  |
| H | 6.792866  | -0.547105 | -2.852587 |
| H | -6.590958 | -1.438786 | -2.415274 |
| H | 7.400608  | 1.437653  | -1.479307 |

\*

-----

|   |           |           |           |
|---|-----------|-----------|-----------|
| C | 1.984615  | -2.391966 | 0.614476  |
| C | 4.287553  | 1.190044  | 1.142383  |
| C | 0.911134  | -3.469797 | 2.975990  |
| C | 1.017446  | -3.412356 | 0.556268  |
| C | 5.260119  | 1.335675  | 2.142469  |
| C | 4.185148  | 2.157465  | 0.135328  |
| C | 0.486122  | -3.951506 | 1.760522  |
| C | 6.111273  | 2.435550  | 2.132490  |
| C | 5.037836  | 3.260197  | 0.126597  |
| C | 6.000204  | 3.400816  | 1.126323  |
| H | 2.614470  | 0.061259  | 0.300103  |
| H | 2.226659  | -2.066579 | 4.008421  |
| H | 2.592041  | -2.159442 | -0.261608 |
| H | 0.510396  | -3.884898 | 3.903505  |
| H | 0.841982  | -3.942659 | -0.380370 |
| H | 5.334779  | 0.578226  | 2.925141  |
| H | 3.426920  | 2.041294  | -0.644006 |
| H | -0.242686 | -4.762536 | 1.707023  |
| H | 6.866304  | 2.548150  | 2.913700  |
| H | 4.947787  | 4.011971  | -0.660318 |
| H | 6.666493  | 4.266473  | 1.125245  |
| O | -1.290279 | -1.541496 | 1.525422  |
| O | 0.254317  | -0.033478 | 1.502729  |
| C | -0.723249 | -0.571952 | 2.111647  |
| C | -1.200205 | -0.065964 | 3.435784  |
| H | -0.407763 | 0.501186  | 3.938129  |
| H | -2.062660 | 0.596781  | 3.268005  |
| H | -1.528155 | -0.905217 | 4.062207  |
| O | 1.266406  | -1.070539 | -1.895148 |
| O | -0.310467 | -2.553056 | -1.946049 |
| C | 0.629255  | -1.949111 | -2.552435 |
| C | 0.947579  | -2.236132 | -3.985536 |
| H | 0.715670  | -3.280515 | -4.226968 |
| H | 2.001179  | -2.015278 | -4.194199 |
| H | 0.322602  | -1.585337 | -4.615905 |

\*

-----

#### F<sup>A</sup>

CPCM (MeOH)

|                      |              |
|----------------------|--------------|
| M06 SCF (DZ) =       | -1664.135237 |
| G (1 atm) =          | -1663.692534 |
| qh-G (1 mol/L) =     | -1663.681708 |
| qh-G (24.56 mol/L) = | -1663.678686 |
| Lowest Frequency =   | 18.77        |

|                           |              |
|---------------------------|--------------|
| HF SCF energy (TZ) =      | -1655.177792 |
| HF SCF energy (QZ) =      | -1655.278105 |
| Correlation energy (DZ) = | -5.820469    |
| Correlation energy (TZ) = | -7.130914    |
| DLPNO-CCSD(T1)/CBS =      | -1663.204986 |

\*xyz 0 1

|    |           |           |           |
|----|-----------|-----------|-----------|
| Ru | -0.000046 | 0.000073  | 0.000000  |
| C  | -3.415809 | 0.121730  | -0.268764 |
| N  | 0.887258  | -1.868374 | -0.250695 |
| C  | -4.647852 | -0.507439 | -0.392024 |
| C  | -3.349076 | 1.470584  | 0.120696  |
| H  | -2.493670 | -0.423015 | -0.474180 |
| N  | -0.887337 | 1.868375  | 0.250703  |
| O  | -1.231483 | -0.822021 | 1.569331  |
| O  | 1.231381  | 0.822092  | -1.569425 |
| O  | 0.740549  | -0.055645 | 2.030506  |
| O  | -0.740549 | 0.055434  | -2.030564 |
| C  | -0.068402 | -2.936225 | -0.299153 |
| C  | 2.127490  | -2.251668 | -0.265318 |

#### F<sup>A</sup>

CPCM (MeOH)

|                        |              |
|------------------------|--------------|
| wB97X-D3 SCF (DZ) =    | -1664.906023 |
| G (1 atm) =            | -1664.449012 |
| qh G-E (1 mol/L) =     | 0.473362     |
| qh G-E (24.56 mol/L) = | 0.476384     |
| Lowest Frequency =     | 14.86        |

|                           |              |
|---------------------------|--------------|
| HF SCF energy (TZ) =      | -1655.184063 |
| HF SCF energy (QZ) =      | -1655.282847 |
| Correlation energy (DZ) = | -5.817148    |
| Correlation energy (TZ) = | -7.126107    |
| DLPNO-CCSD(T1)/CBS =      | -1663.203591 |

SMD (MeOH)

|                           |              |
|---------------------------|--------------|
| HF SCF energy (TZ) =      | -1655.201273 |
| HF SCF energy (QZ) =      | -1655.299838 |
| Correlation energy (DZ) = | -5.810870    |
| Correlation energy (TZ) = | -7.121386    |
| DLPNO-CCSD(T1)/CBS =      | -1663.216703 |

\*xyz 0 1

|    |           |           |           |
|----|-----------|-----------|-----------|
| Ru | 0.000169  | 0.000246  | 0.000364  |
| C  | -3.340421 | 0.305660  | -0.674917 |
| N  | 0.846929  | -1.913953 | -0.151819 |
| C  | -4.511381 | -0.445293 | -0.715244 |
| C  | -3.272250 | 1.452219  | 0.129012  |
| N  | -0.847091 | 1.914253  | 0.152474  |

|   |           |           |           |
|---|-----------|-----------|-----------|
| C | -5.830648 | 0.185610  | -0.130000 |
| H | -4.688448 | -1.555931 | -0.698711 |
| C | -4.549868 | 2.161136  | 0.367267  |
| C | -2.127548 | 2.251759  | 0.265287  |
| C | 0.068400  | 2.936154  | 0.299371  |
| C | -0.327803 | -0.614460 | 2.432290  |
| C | 0.327790  | 0.614201  | -2.432410 |
| C | -0.060655 | -3.919232 | 0.693245  |
| C | -1.025120 | -2.976446 | -1.315898 |
| C | 3.348973  | -1.470400 | -0.120885 |
| H | 2.308877  | -3.328986 | -0.414660 |
| C | -5.779396 | 1.525477  | 0.250783  |
| H | -6.794858 | -0.319754 | -0.228167 |
| H | -4.508428 | 3.215327  | 0.658500  |
| H | -2.308851 | 3.329081  | 0.414701  |
| C | 1.024836  | 2.976387  | 1.316370  |
| C | 0.060954  | 3.919094  | -0.693091 |
| C | -0.495652 | -1.041867 | 3.850332  |
| C | 0.496205  | 1.041114  | -3.850534 |
| C | -1.005319 | -4.943470 | 0.665779  |
| H | 0.676732  | -3.860413 | 1.499742  |
| C | -1.957226 | -4.009206 | -1.341429 |
| H | -1.024827 | -2.190562 | -2.074373 |
| C | 4.549778  | -2.160860 | -0.367617 |
| C | 3.415642  | -0.121559 | 0.268628  |
| H | -6.700420 | 2.077270  | 0.452723  |
| C | 1.957019  | 4.009078  | 1.342051  |
| H | 1.024293  | 2.190554  | 2.074899  |
| C | 1.005678  | 4.943267  | -0.665466 |
| H | -0.676246 | 3.860257  | -1.499754 |
| H | -1.551139 | -0.986461 | 4.147446  |
| H | -0.173466 | -2.090982 | 3.946239  |
| H | 0.124643  | -0.430526 | 4.518170  |
| H | -0.134219 | 0.439000  | -4.517180 |
| H | 1.549975  | 0.972076  | -4.151074 |
| H | 0.188567  | 2.094821  | -3.943866 |
| C | -1.954372 | -4.993642 | -0.352077 |
| H | -0.999188 | -5.703912 | 1.450873  |
| H | -2.697740 | -4.043915 | -2.144954 |
| C | 5.779273  | -1.525112 | -0.251253 |
| H | 4.508379  | -3.215043 | -0.658886 |
| C | 4.647653  | 0.507697  | 0.391769  |
| H | 2.493476  | 0.423098  | 0.474186  |
| C | 1.954490  | 4.993434  | 0.352618  |
| H | 2.697374  | 4.043755  | 2.145726  |
| H | 0.999775  | 5.703683  | -1.450589 |
| H | -2.694969 | -5.796870 | -0.373811 |
| C | 5.830469  | -0.185261 | 0.129577  |
| H | 6.700313  | -2.076831 | -0.453316 |
| H | 4.688207  | 1.556175  | 0.698506  |
| H | 2.695155  | 5.796597  | 0.374465  |
| H | 6.794657  | 0.320162  | 0.227659  |

\*

-----

**cis-F<sup>A</sup>**

CPCM (MeOH)

M06 SCF (DZ) = -1663.691961

G (1 atm) = -1664.131748

|   |           |           |           |
|---|-----------|-----------|-----------|
| C | -0.134159 | -2.965670 | -0.196658 |
| C | 2.073633  | -2.301064 | -0.226456 |
| C | -5.619998 | -0.066678 | 0.045082  |
| C | -4.401792 | 1.850468  | 0.858559  |
| C | -2.073965 | 2.300659  | 0.228109  |
| C | 0.133398  | 2.966568  | 0.195051  |
| C | -0.202904 | -3.894476 | 0.842140  |
| C | -1.041634 | -3.021524 | -1.256616 |
| C | 3.272468  | -1.453553 | -0.126291 |
| C | -5.565645 | 1.085531  | 0.830442  |
| C | 1.044363  | 3.022194  | 1.252039  |
| C | 0.198177  | 3.896103  | -0.843352 |
| C | -1.184383 | -4.886239 | 0.818709  |
| C | -2.011955 | -4.020180 | -1.275996 |
| C | 4.402841  | -1.853963 | -0.853428 |
| C | 3.340430  | -0.305748 | 0.675861  |
| C | 2.014163  | 4.021382  | 1.268820  |
| C | 1.179173  | 4.888401  | -0.822558 |
| C | -2.090040 | -4.952406 | -0.238619 |
| C | 5.567402  | -1.090134 | -0.824589 |
| C | 4.512075  | 0.444088  | 0.716977  |
| C | 2.088266  | 4.954365  | 0.231812  |
| C | 5.621595  | 0.063235  | -0.040905 |
| H | -2.478028 | 0.014212  | -1.273995 |
| H | -4.556747 | -1.338063 | -1.343165 |
| H | 2.264742  | -3.368661 | -0.408610 |
| H | -6.533421 | -0.665260 | 0.016966  |
| H | -4.360345 | 2.760132  | 1.463781  |
| H | -2.265531 | 3.368187  | 0.410165  |
| H | 0.498496  | -3.821503 | 1.676573  |
| H | -0.975976 | -2.275277 | -2.049594 |
| H | -6.433524 | 1.392851  | 1.417623  |
| H | 0.981611  | 2.275452  | 2.044800  |
| H | -0.505916 | 3.823156  | -1.675521 |
| H | -1.241878 | -5.606899 | 1.637362  |
| H | -2.716337 | -4.069051 | -2.109548 |
| H | 4.361528  | -2.764524 | -1.457308 |
| H | 2.477378  | -0.012573 | 1.273131  |
| H | 2.721349  | 4.070125  | 2.100000  |
| H | 1.233590  | 5.609543  | -1.640993 |
| H | -2.858793 | -5.727835 | -0.255373 |
| H | 6.435945  | -1.399228 | -1.409853 |
| H | 4.557261  | 1.337759  | 1.343631  |
| H | 2.856674  | 5.730176  | 0.246459  |
| H | 6.535537  | 0.660995  | -0.012191 |
| O | -1.419886 | -0.761753 | 1.435001  |
| O | 0.484970  | 0.019314  | 2.111756  |
| C | -0.635203 | -0.513691 | 2.396400  |
| C | -0.998162 | -0.867300 | 3.806126  |
| H | -2.089398 | -0.901811 | 3.917476  |
| H | -0.601416 | -1.869870 | 4.027419  |
| H | -0.561979 | -0.149306 | 4.510466  |
| O | 1.420630  | 0.761999  | -1.433764 |
| O | -0.484475 | -0.017793 | -2.111323 |
| C | 0.635993  | 0.514823  | -2.395460 |
| C | 0.999548  | 0.869034  | -3.804879 |
| H | 0.563526  | 0.151542  | -4.509815 |
| H | 2.090857  | 0.903249  | -3.915755 |
| H | 0.603345  | 1.871915  | -4.025710 |

\*

-----

**cis-F<sup>A</sup>**

CPCM (MeOH)

wB97X-D3 SCF (DZ) = -1664.899239

G (1 atm) = -1664.441320



qh-G (1 mol/L) = -1663.679762  
 qh-G (24.56 mol/L) = -1663.676741  
 Lowest Frequency = 22.62

HF SCF energy (TZ) = -1654.774653  
 HF SCF energy (QZ) = -1655.163581  
 Correlation energy (DZ) = -5.831585  
 Correlation energy (TZ) = -7.142172  
 DLPNO-CCSD(T1)/CBS = -1663.198062

\*xyz 0 1

|    |           |           |           |
|----|-----------|-----------|-----------|
| Ru | 0.027970  | -0.664330 | -0.756968 |
| C  | -3.375924 | -0.629801 | -0.200285 |
| N  | 1.420606  | 0.830908  | -0.577834 |
| C  | -4.687571 | -0.736079 | -0.647237 |
| C  | -3.081482 | -0.802334 | 1.163151  |
| H  | -2.577260 | -0.401449 | -0.907618 |
| O  | -1.026625 | -2.545567 | -0.943008 |
| N  | -0.593679 | -0.533341 | 1.213751  |
| O  | 0.355952  | -0.739318 | -2.888013 |
| O  | 1.007527  | -2.483147 | -0.172961 |
| O  | -1.071754 | 0.678931  | -2.063445 |
| C  | 2.750211  | 0.283609  | -0.619086 |
| C  | 1.384570  | 2.124125  | -0.441839 |
| C  | -5.722712 | -1.024186 | 0.242683  |
| H  | -4.905866 | -0.593007 | -1.708511 |
| C  | -4.137141 | -1.076432 | 2.052251  |
| C  | -1.762707 | -0.674103 | 1.767166  |
| C  | -0.017532 | -3.166725 | -0.490820 |
| C  | 0.454751  | -0.316054 | 2.181910  |
| C  | -0.505158 | 0.172718  | -3.081981 |
| C  | 3.236538  | -0.307799 | -1.786734 |
| C  | 3.546702  | 0.339293  | 0.525586  |
| C  | 0.252179  | 3.018530  | -0.239034 |
| H  | 2.356956  | 2.641504  | -0.465988 |
| C  | -5.443921 | -1.195213 | 1.597945  |
| H  | -6.749801 | -1.110780 | -0.120856 |
| H  | -3.918319 | -1.198929 | 3.117501  |
| H  | -1.781661 | -0.674984 | 2.868947  |
| C  | -0.034419 | -4.644929 | -0.298609 |
| C  | 1.262285  | -1.371841 | 2.606142  |
| C  | 0.622683  | 0.958008  | 2.726597  |
| C  | -0.868611 | 0.619771  | -4.456746 |
| C  | 4.521789  | -0.841344 | -1.799848 |
| H  | 2.596358  | -0.343763 | -2.670527 |
| C  | 4.826665  | -0.210897 | 0.506301  |
| H  | 3.146338  | 0.796774  | 1.435486  |
| C  | -1.057672 | 2.614377  | 0.069036  |
| C  | 0.527937  | 4.395406  | -0.310709 |
| H  | -6.248686 | -1.415555 | 2.303172  |
| H  | -0.335275 | -4.863110 | 0.738574  |
| H  | 0.967599  | -5.066459 | -0.452695 |
| H  | -0.759479 | -5.117741 | -0.973164 |
| C  | 2.243781  | -1.143843 | 3.567191  |
| H  | 1.114546  | -2.361952 | 2.172858  |
| C  | 1.614645  | 1.179471  | 3.680083  |
| H  | -0.030392 | 1.772052  | 2.398184  |
| H  | -0.087951 | 0.344033  | -5.176551 |
| H  | -1.808288 | 0.127985  | -4.753430 |
| H  | -1.042184 | 1.704035  | -4.474219 |
| C  | 5.318937  | -0.801316 | -0.655144 |
| H  | 4.904991  | -1.295563 | -2.717381 |
| H  | 5.440496  | -0.175848 | 1.410577  |
| C  | -2.052546 | 3.557329  | 0.288073  |
| H  | -1.283275 | 1.551629  | 0.136780  |
| C  | -0.472077 | 5.338176  | -0.104022 |

qh G-E (1 mol/L) = 0.472467  
 qh G-E (24.56 mol/L) = 0.475490  
 Lowest Frequencies = 23.68

HF SCF energy (TZ) = -1654.778159  
 HF SCF energy (QZ) = -1655.168244  
 Correlation energy (DZ) = -5.825477  
 Correlation energy (TZ) = -7.136409  
 DLPNO-CCSD(T1)/CBS = -1663.197541

SMD (MeOH)

HF SCF energy (TZ) = -1655.186618  
 HF SCF energy (QZ) = -1655.285442  
 Correlation energy (DZ) = -5.818777  
 Correlation energy (TZ) = -7.131141  
 DLPNO-CCSD(T1)/CBS = -1663.213221

\* xyz 0 1

|    |           |           |           |
|----|-----------|-----------|-----------|
| Ru | 0.214356  | -0.587188 | 0.239488  |
| N  | 1.009016  | 0.979204  | -0.939845 |
| N  | -1.685762 | 0.329176  | 0.427570  |
| C  | 0.144980  | 1.641932  | -1.887362 |
| C  | 2.247753  | 1.335142  | -1.030847 |
| O  | 0.378801  | -1.743497 | -1.591809 |
| O  | 0.386473  | -0.148741 | 2.355036  |
| O  | 1.994355  | -1.747983 | -0.137045 |
| O  | -0.395911 | -2.065456 | 1.689917  |
| C  | -1.763127 | 1.764471  | 0.559093  |
| C  | -2.820908 | -0.265664 | 0.596685  |
| C  | -0.721777 | 0.900814  | -2.694990 |
| C  | 0.165008  | 3.035742  | -1.983079 |
| C  | 3.357521  | 0.946557  | -0.149801 |
| H  | 2.528476  | 1.998382  | -1.860682 |
| C  | 1.530650  | -2.155699 | -1.243875 |
| C  | -0.068312 | -1.302160 | 2.646003  |
| C  | -2.739169 | 2.467403  | -0.153167 |
| C  | -0.861137 | 2.457807  | 1.370580  |
| C  | -3.132211 | -1.686169 | 0.385312  |
| H  | -3.670707 | 0.343601  | 0.934122  |
| C  | -1.552004 | 1.557994  | -3.599808 |
| H  | -0.718616 | -0.185593 | -2.622397 |
| C  | -0.672419 | 3.685778  | -2.887863 |
| H  | 0.811288  | 3.614981  | -1.320264 |
| C  | 4.630414  | 0.841219  | -0.728027 |
| C  | 3.205584  | 0.733251  | 1.225699  |
| C  | 2.323763  | -3.080101 | -2.117147 |
| C  | -0.211689 | -1.729169 | 4.075409  |
| C  | -2.823235 | 3.854021  | -0.043853 |
| H  | -3.411149 | 1.927533  | -0.823573 |
| C  | -0.952864 | 3.843702  | 1.475086  |
| H  | -0.111418 | 1.902378  | 1.931259  |
| C  | -2.534767 | -2.455834 | -0.620154 |
| C  | -4.129514 | -2.256028 | 1.189505  |
| C  | -1.534040 | 2.950349  | -3.699147 |
| H  | -2.219166 | 0.970872  | -4.235009 |
| H  | -0.659205 | 4.776377  | -2.943681 |
| C  | 5.727986  | 0.471636  | 0.045826  |
| H  | 4.755104  | 1.033440  | -1.796951 |
| C  | 4.308955  | 0.387746  | 2.000613  |
| H  | 2.223712  | 0.826891  | 1.688122  |
| H  | 1.744358  | -3.378519 | -2.998164 |
| H  | 3.243800  | -2.568502 | -2.435033 |
| H  | 2.617220  | -3.968074 | -1.540211 |
| H  | -0.930194 | -1.067651 | 4.579987  |
| H  | 0.755550  | -1.625275 | 4.586521  |
| H  | -0.559160 | -2.766658 | 4.136755  |

|   |           |           |           |
|---|-----------|-----------|-----------|
| H | 1.547318  | 4.724070  | -0.535681 |
| C | 2.429137  | 0.130328  | 4.102587  |
| H | 2.868674  | -1.975369 | 3.903328  |
| H | 1.741979  | 2.179678  | 4.102090  |
| H | 6.323883  | -1.230516 | -0.670651 |
| C | -1.767358 | 4.920928  | 0.197265  |
| H | -3.064687 | 3.223131  | 0.531700  |
| H | -0.238433 | 6.403313  | -0.171533 |
| H | 3.202094  | 0.303534  | 4.855374  |
| H | -2.555532 | 5.658610  | 0.367606  |

\*

-----

|   |           |           |           |
|---|-----------|-----------|-----------|
| C | -1.930908 | 4.547947  | 0.770761  |
| H | -3.583281 | 4.392867  | -0.613700 |
| H | -0.250351 | 4.378903  | 2.117930  |
| C | -2.911149 | -3.784674 | -0.794527 |
| H | -1.778999 | -2.013289 | -1.267188 |
| C | -4.488092 | -3.591938 | 1.027322  |
| H | -4.617557 | -1.648169 | 1.955806  |
| H | -2.194901 | 3.460520  | -4.403266 |
| C | 5.567660  | 0.242969  | 1.412849  |
| H | 6.711420  | 0.369194  | -0.417636 |
| H | 4.183640  | 0.224323  | 3.073309  |
| H | -1.991751 | 5.635282  | 0.852547  |
| C | -3.878074 | -4.358549 | 0.033568  |
| H | -2.445654 | -4.377216 | -1.585261 |
| H | -5.252322 | -4.032791 | 1.670809  |
| H | 6.427878  | -0.039680 | 2.023973  |
| H | -4.165201 | -5.403587 | -0.103752 |

\*

-----

F<sup>c</sup>

CPCM (MeOH)  
M06 SCF (DZ) = -1496.971413  
G (1 atm) = -1496.520099  
qh-G (1 mol/L) = -1496.509795  
qh-G (24.56 mol/L) = -1496.506772  
Lowest Frequency = 11.12

HF SCF energy (TZ) = -1488.788639  
HF SCF energy (QZ) = -1488.878856  
Correlation energy (DZ) = -5.347938  
Correlation energy (TZ) = -6.553782  
DLPNO-CCSD(T1)/CBS = -1496.164438

\*xyz 0 1

|    |           |           |           |
|----|-----------|-----------|-----------|
| Ru | 0.111322  | -0.359672 | 0.453782  |
| C  | 2.353593  | -0.498488 | 1.074401  |
| C  | 1.725774  | -1.748394 | 1.290208  |
| C  | 3.337553  | -0.352359 | 0.040925  |
| H  | 2.340827  | 0.255695  | 1.869074  |
| N  | -1.815105 | 0.273050  | -0.124515 |
| O  | 0.736564  | 0.037588  | -1.552594 |
| O  | 0.151691  | 1.248438  | 1.887428  |
| O  | -0.668794 | -0.670997 | 2.448677  |
| O  | -0.141649 | -1.869662 | -1.044647 |
| H  | 1.238467  | -1.957217 | 2.248390  |
| C  | 4.100200  | 0.950984  | -0.042421 |
| C  | 3.584202  | -1.433105 | -0.772985 |
| C  | -2.733633 | -0.817818 | -0.303405 |
| C  | -2.309281 | 1.435100  | -0.418245 |
| C  | 0.348448  | -1.110135 | -1.933814 |
| C  | -0.425712 | 0.535422  | 2.762791  |
| C  | 5.245000  | 0.939296  | -1.041109 |
| C  | 3.168349  | 2.126440  | -0.325761 |
| H  | 4.533140  | 1.116415  | 0.966501  |
| C  | 2.932985  | -2.679358 | -0.572992 |
| H  | 4.328644  | -1.362640 | -1.570640 |
| C  | -3.267022 | -1.057144 | -1.571930 |
| C  | -3.073869 | -1.645380 | 0.767595  |
| C  | -1.662012 | 2.736469  | -0.492302 |
| H  | -3.386639 | 1.463753  | -0.652040 |
| C  | 0.472017  | -1.553585 | -3.349491 |
| C  | -0.830867 | 1.090696  | 4.083792  |
| H  | 5.794180  | 1.893313  | -1.001445 |
| H  | 4.871076  | 0.819560  | -2.073290 |
| H  | 5.964682  | 0.128642  | -0.844983 |

F<sup>c</sup>

CPCM (MeOH)  
wB97X-D3 SCF (DZ) = -1497.674330  
G (1 atm) = -1497.208238  
qh G-E (1 mol/L) = 0.479226  
qh G-E (24.56 mol/L) = 0.482249  
Lowest Frequency = 8.16

HF SCF energy (TZ) = -1488.799691  
HF SCF energy (QZ) = -1488.888333  
Correlation energy (DZ) = -5.339361  
Correlation energy (TZ) = -6.544600  
DLPNO-CCSD(T1)/CBS = -1496.163906

SMD (MeOH)

HF SCF energy (TZ) = -1488.816062  
HF SCF energy (QZ) = -1488.904545  
Correlation energy (DZ) = -5.333610  
Correlation energy (TZ) = -6.540115  
DLPNO-CCSD(T1)/CBS = -1496.176325

\* xyz 0 1

|    |           |           |           |
|----|-----------|-----------|-----------|
| Ru | 0.091499  | -0.296238 | 0.413237  |
| N  | -1.824583 | 0.286392  | -0.214878 |
| C  | -2.713807 | -0.820163 | -0.474679 |
| C  | -2.355600 | 1.447598  | -0.390080 |
| C  | -3.108602 | -1.664695 | 0.563444  |
| C  | -3.155185 | -1.046858 | -1.778923 |
| C  | -1.703878 | 2.762486  | -0.323288 |
| C  | -3.952625 | -2.738471 | 0.287590  |
| C  | -3.995871 | -2.127211 | -2.046003 |
| C  | -0.358940 | 2.974320  | -0.652871 |
| C  | -2.510541 | 3.855638  | 0.026132  |
| C  | -4.395780 | -2.976377 | -1.014960 |
| C  | 0.171711  | 4.259776  | -0.606455 |
| C  | -1.969938 | 5.137046  | 0.094004  |
| C  | -0.626390 | 5.339793  | -0.223207 |
| H  | -3.431503 | 1.477472  | -0.614509 |
| H  | -2.747283 | -1.471962 | 1.573588  |
| H  | -2.823295 | -0.385786 | -2.582653 |
| H  | -4.265605 | -3.396603 | 1.101172  |
| H  | -4.334763 | -2.305143 | -3.068850 |
| H  | 0.259204  | 2.131307  | -0.959810 |
| H  | -3.567454 | 3.694659  | 0.254368  |
| H  | -5.052889 | -3.822881 | -1.225006 |
| H  | 1.218205  | 4.422060  | -0.873205 |

|   |           |           |           |
|---|-----------|-----------|-----------|
| H | 3.731974  | 3.074362  | -0.331419 |
| H | 2.685308  | 2.003028  | -1.311214 |
| H | 2.371706  | 2.207830  | 0.431388  |
| C | 2.037577  | -2.864786 | 0.450317  |
| H | 3.179167  | -3.519572 | -1.231766 |
| C | -4.143057 | -2.121870 | -1.768678 |
| H | -2.968041 | -0.417901 | -2.408465 |
| C | -3.957332 | -2.701503 | 0.562871  |
| H | -2.642672 | -1.446828 | 1.750505  |
| C | -0.274318 | 2.940227  | -0.517948 |
| C | -2.514928 | 3.849763  | -0.590287 |
| H | 0.697029  | -0.707556 | -4.010440 |
| H | -0.453387 | -2.053358 | -3.670250 |
| H | 1.287271  | -2.290985 | -3.421214 |
| H | -0.235001 | 1.977448  | 4.333177  |
| H | -1.890774 | 1.385495  | 4.035262  |
| H | -0.731445 | 0.327431  | 4.866860  |
| C | 1.365858  | -4.170738 | 0.718490  |
| C | -4.492146 | -2.946673 | -0.701913 |
| H | -4.550013 | -2.308332 | -2.765746 |
| H | -4.231644 | -3.341574 | 1.405424  |
| C | 0.238479  | 4.226228  | -0.622536 |
| H | 0.394465  | 2.081039  | -0.464670 |
| C | -1.998393 | 5.136199  | -0.682161 |
| H | -3.598220 | 3.694930  | -0.589157 |
| H | 0.269830  | -4.060717 | 0.640331  |
| H | 1.684840  | -4.951097 | 0.011596  |
| H | 1.575738  | -4.526989 | 1.741815  |
| H | -5.178698 | -3.782789 | -0.855567 |
| C | -0.617478 | 5.326199  | -0.698282 |
| H | 1.321889  | 4.372215  | -0.647285 |
| H | -2.673443 | 5.992373  | -0.749059 |
| H | -0.205096 | 6.335181  | -0.778186 |

\*

-----

|   |           |           |           |
|---|-----------|-----------|-----------|
| H | -2.600331 | 5.980432  | 0.382690  |
| H | -0.201430 | 6.345289  | -0.183533 |
| C | 1.789867  | -1.556296 | 1.460388  |
| C | 2.412422  | -0.369086 | 1.040475  |
| C | 2.049734  | -2.789641 | 0.787792  |
| C | 3.349687  | -0.382042 | -0.041711 |
| C | 1.363943  | -4.039669 | 1.261961  |
| C | 2.908844  | -2.771589 | -0.284427 |
| C | 4.119938  | 0.891977  | -0.357190 |
| C | 3.558931  | -1.577559 | -0.692721 |
| C | 5.164156  | 0.725125  | -1.459549 |
| C | 3.188350  | 2.065827  | -0.679511 |
| H | 1.288085  | -1.593725 | 2.428803  |
| H | 2.373537  | 0.511256  | 1.685534  |
| H | 1.576371  | -4.230547 | 2.325878  |
| H | 0.270965  | -3.936866 | 1.164448  |
| H | 1.679212  | -4.918613 | 0.682953  |
| H | 3.117975  | -3.698408 | -0.826064 |
| H | 4.659475  | 1.153070  | 0.573031  |
| H | 4.262338  | -1.635999 | -1.525350 |
| H | 5.897839  | -0.059833 | -1.221717 |
| H | 4.691421  | 0.469927  | -2.422470 |
| H | 5.714887  | 1.667339  | -1.600115 |
| H | 3.768353  | 2.994584  | -0.795684 |
| H | 2.637470  | 1.877053  | -1.613335 |
| H | 2.447079  | 2.227143  | 0.116751  |
| O | 0.072159  | 1.294863  | 1.868866  |
| O | -0.807994 | -0.621804 | 2.350977  |
| C | -0.572871 | 0.580224  | 2.693458  |
| C | -1.073409 | 1.134099  | 3.990322  |
| H | -1.021499 | 0.369988  | 4.776040  |
| H | -2.127803 | 1.421006  | 3.857534  |
| H | -0.498434 | 2.022384  | 4.277234  |
| O | 0.784726  | 0.077742  | -1.585734 |
| O | -0.033678 | -1.851153 | -1.053200 |
| C | 0.469638  | -1.100457 | -1.942053 |
| C | 0.695169  | -1.589844 | -3.337802 |
| H | -0.150929 | -2.211941 | -3.657436 |
| H | 1.601553  | -2.214118 | -3.345088 |
| H | 0.835961  | -0.748812 | -4.026622 |

\*

-----

#### F<sup>S</sup>

CPCM (MeOH)  
M06 SCF (DZ) = -1223.438642  
G (1 atm) = -1223.138393  
qh-G (1 mol/L) = -1223.129016  
qh-G (24.56 mol/L) = -1223.125994  
Lowest Frequency = 18.08

HF SCF energy (TZ) = -1216.960319  
HF SCF energy (QZ) = -1217.035943  
Correlation energy (DZ) = -4.163223  
Correlation energy (TZ) = -5.165577  
DLPNO-CCSD(T1)/CBS = -1222.810017

#### \*xyz 0 1

|    |           |           |           |
|----|-----------|-----------|-----------|
| Ru | -0.410891 | -0.910482 | 0.200278  |
| N  | 0.055561  | 0.980529  | -0.325485 |
| O  | -0.958442 | -2.923743 | 0.825799  |
| C  | -1.112838 | 1.776410  | -0.587617 |
| C  | 1.175375  | 1.639923  | -0.390698 |
| O  | -1.110104 | -1.453983 | -1.760210 |
| O  | 0.229487  | -0.502503 | 2.213120  |
| O  | 0.960509  | -1.785176 | -1.215784 |

#### F<sup>S</sup>

CPCM (MeOH)  
wB97X-D3 SCF (DZ) = -1223.951610  
G (1 atm) = -1223.638811  
qh G-E (1 mol/L) = 0.324576  
qh G-E (24.56 mol/L) = 0.327598  
Lowest Frequency = 24.04

HF SCF energy (TZ) = -1216.965341  
HF SCF energy (QZ) = -1217.039852  
Correlation energy (DZ) = -4.160127  
Correlation energy (TZ) = -5.162068  
DLPNO-CCSD(T1)/CBS = -1222.809842

#### SMD (MeOH)

HF SCF energy (TZ) = -1216.978585  
HF SCF energy (QZ) = -1217.052895  
Correlation energy (DZ) = -4.154473  
Correlation energy (TZ) = -5.157454  
DLPNO-CCSD(T1)/CBS = -1222.818817

#### \*xyz 0 1

|       |           |           |           |    |           |           |           |
|-------|-----------|-----------|-----------|----|-----------|-----------|-----------|
| O     | -1.837082 | -0.204215 | 1.631561  | Ru | -0.413316 | -0.861510 | 0.335944  |
| C     | -2.318865 | -3.315422 | 0.619331  | N  | 0.050190  | 1.051386  | -0.235340 |
| H     | -0.374913 | -3.576792 | 0.410333  | C  | -1.117657 | 1.823274  | -0.584640 |
| C     | -1.844201 | 1.582926  | -1.759763 | C  | 1.168462  | 1.656184  | -0.455758 |
| C     | -1.510564 | 2.740506  | 0.339837  | C  | -1.553312 | 1.863489  | -1.909163 |
| C     | 2.534711  | 1.193249  | -0.125202 | C  | -1.800886 | 2.524976  | 0.408510  |
| H     | 1.101742  | 2.692938  | -0.705363 | C  | 2.533736  | 1.177074  | -0.202566 |
| C     | 0.039599  | -1.887773 | -2.083362 | C  | -2.685159 | 2.608872  | -2.238162 |
| C     | -0.947541 | -0.152207 | 2.536210  | C  | -2.930396 | 3.268228  | 0.070937  |
| H     | -2.491945 | -4.318676 | 1.036361  | C  | 2.858540  | 0.094995  | 0.629072  |
| H     | -2.577207 | -3.296652 | -0.450811 | C  | 3.568460  | 1.895761  | -0.822895 |
| H     | -2.936277 | -2.583668 | 1.155393  | C  | -3.377920 | 3.309434  | -1.250458 |
| C     | -2.969132 | 2.365412  | -2.003184 | C  | 4.189716  | -0.263942 | 0.817225  |
| H     | -1.523166 | 0.813318  | -2.463632 | C  | 4.898435  | 1.526425  | -0.642147 |
| C     | -2.643751 | 3.512531  | 0.092366  | C  | 5.211148  | 0.443174  | 0.179332  |
| H     | -0.932200 | 2.864401  | 1.260661  | H  | 1.113582  | 2.661163  | -0.896813 |
| C     | 2.892404  | -0.044755 | 0.435690  | H  | -1.006957 | 1.303618  | -2.669721 |
| C     | 3.556637  | 2.105634  | -0.448036 | H  | -1.445018 | 2.482804  | 1.438602  |
| C     | 0.283810  | -2.517061 | -3.412221 | H  | -3.025005 | 2.642002  | -3.275682 |
| C     | -1.267351 | 0.337159  | 3.906988  | H  | -3.462843 | 3.819861  | 0.848855  |
| C     | -3.374350 | 3.329321  | -1.079608 | H  | 2.064994  | -0.451742 | 1.136479  |
| H     | -3.535662 | 2.220491  | -2.926721 | H  | 3.322174  | 2.750894  | -1.457931 |
| H     | -2.955938 | 4.262929  | 0.823318  | H  | -4.264315 | 3.891774  | -1.510877 |
| C     | 4.229892  | -0.352831 | 0.652182  | H  | 4.433130  | -1.104457 | 1.470693  |
| H     | 2.109170  | -0.756779 | 0.699817  | H  | 5.692600  | 2.087608  | -1.138617 |
| C     | 4.892442  | 1.790388  | -0.236434 | H  | 6.253736  | 0.154457  | 0.330817  |
| H     | 3.288274  | 3.076648  | -0.875826 | O  | -0.903541 | -2.902322 | 0.888199  |
| H     | -0.309979 | -2.016768 | -4.188647 | C  | -2.255746 | -3.348090 | 0.711352  |
| H     | -0.036364 | -3.570097 | -3.373848 | H  | -0.310444 | -3.518308 | 0.433970  |
| H     | 1.350814  | -2.488744 | -3.666469 | H  | -2.363453 | -4.369599 | 1.103071  |
| H     | -2.288443 | 0.048543  | 4.189354  | H  | -2.543442 | -3.314388 | -0.349606 |
| H     | -1.215634 | 1.437739  | 3.914069  | H  | -2.885690 | -2.662370 | 1.289325  |
| H     | -0.543065 | -0.045989 | 4.636941  | O  | -1.102321 | -1.279029 | -1.648904 |
| H     | -4.261012 | 3.937839  | -1.273987 | O  | 0.961028  | -1.676260 | -1.111741 |
| C     | 5.233499  | 0.556237  | 0.315143  | C  | 0.042664  | -1.712192 | -1.989034 |
| H     | 4.494693  | -1.317781 | 1.092003  | C  | 0.284729  | -2.272303 | -3.357321 |
| H     | 5.670952  | 2.510469  | -0.499522 | H  | -0.278738 | -1.700226 | -4.105294 |
| H     | 6.282822  | 0.303225  | 0.487095  | H  | -0.078054 | -3.311180 | -3.378901 |
| *     |           |           |           | H  | 1.355068  | -2.266529 | -3.594650 |
| ----- |           |           |           |    |           |           |           |
|       |           |           |           | O  | 0.205977  | -0.561699 | 2.377114  |
|       |           |           |           | O  | -1.855196 | -0.222009 | 1.793786  |
|       |           |           |           | C  | -0.975198 | -0.232140 | 2.708770  |
|       |           |           |           | C  | -1.308949 | 0.172040  | 4.111699  |
|       |           |           |           | H  | -2.346789 | -0.091920 | 4.349256  |
|       |           |           |           | H  | -1.204412 | 1.265121  | 4.191292  |
|       |           |           |           | H  | -0.618135 | -0.295728 | 4.823342  |
|       |           |           |           | *  |           |           |           |
| ----- |           |           |           |    |           |           |           |

#### F<sup>25</sup>

CPCM (MeOH)  
 M06 SCF (DZ) = -1339.118736  
 G (1 atm) = -1338.766181  
 qh-G (1 mol/L) = -1338.757489  
 qh-G (24.56 mol/L) = -1338.754467  
 Lowest Frequency = 34.40

HF SCF energy (TZ) = -1332.055648  
 HF SCF energy (QZ) = -1332.139588  
 Correlation energy (DZ) = -4.549922  
 Correlation energy (TZ) = -5.644693  
 DLPNO-CCSD(T1)/CBS = -1338.449287

\*xyz 0 1

|    |           |           |          |
|----|-----------|-----------|----------|
| Ru | 0.395948  | 0.580333  | 0.134426 |
| C  | -3.076500 | -0.386072 | 0.827147 |

|   |           |           |           |
|---|-----------|-----------|-----------|
| O | 1.871050  | 0.185022  | -1.419954 |
| C | -2.719226 | -1.303098 | -0.171153 |
| C | -4.375420 | 0.109340  | 0.883778  |
| H | -2.330531 | -0.067173 | 1.557577  |
| O | -0.772597 | 1.134883  | -1.630931 |
| O | -0.637896 | 1.107330  | 1.936678  |
| N | -0.246344 | -1.376151 | 0.010421  |
| O | 1.393009  | 0.344528  | 1.997474  |
| O | 1.121397  | 2.585540  | 0.136582  |
| C | 3.199711  | 0.019488  | -0.932775 |
| H | 1.835964  | 1.055820  | -1.893153 |
| C | -3.690271 | -1.724016 | -1.092973 |
| C | -1.396597 | -1.918010 | -0.249506 |
| C | -5.324337 | -0.283407 | -0.059978 |
| H | -4.650073 | 0.813599  | 1.673335  |
| C | -1.907048 | 1.971555  | -1.417325 |
| H | -0.087097 | 1.706102  | -2.061180 |
| C | 0.395465  | 0.822597  | 2.621466  |
| C | 0.858971  | -2.290540 | -0.087569 |
| C | 1.427260  | 3.202844  | -0.929239 |
| H | 3.515762  | 0.896997  | -0.342369 |
| H | 3.215202  | -0.869005 | -0.286771 |
| H | 3.894036  | -0.130632 | -1.774854 |
| C | -4.977663 | -1.200618 | -1.051936 |
| H | -3.421708 | -2.460693 | -1.856487 |
| H | -1.393881 | -2.973501 | -0.568924 |
| H | -6.340556 | 0.116448  | -0.015474 |
| H | -2.244363 | 2.398287  | -2.375128 |
| H | -1.669240 | 2.787592  | -0.712404 |
| H | -2.711420 | 1.356096  | -0.993901 |
| C | 0.441049  | 1.065048  | 4.090137  |
| C | 1.582738  | -2.619548 | 1.059268  |
| C | 1.202233  | -2.848568 | -1.319858 |
| C | 1.905774  | 4.620583  | -0.795939 |
| O | 1.353664  | 2.706869  | -2.092630 |
| H | -5.718948 | -1.520156 | -1.788468 |
| H | 1.173575  | 0.403672  | 4.570049  |
| H | 0.748713  | 2.107059  | 4.270016  |
| H | -0.553036 | 0.926420  | 4.534967  |
| C | 2.646550  | -3.513023 | 0.968315  |
| H | 1.306838  | -2.161481 | 2.011148  |
| C | 2.274890  | -3.733080 | -1.404045 |
| H | 0.634049  | -2.566102 | -2.210591 |
| H | 1.236322  | 5.281081  | -1.367667 |
| H | 2.903476  | 4.710504  | -1.251291 |
| H | 1.943090  | 4.947129  | 0.250367  |
| C | 2.998673  | -4.069517 | -0.261586 |
| H | 3.205960  | -3.777116 | 1.869465  |
| H | 2.545844  | -4.161869 | -2.372258 |
| H | 3.838180  | -4.765795 | -0.328812 |

\*

-----  
**cis-G<sup>A</sup>**

CPCM (MeOH)  
M06 SCF (DZ) = -1664.127413  
G (1 atm) = -1663.688223  
qh-G (1 mol/L) = -1663.676636  
qh-G (24.56 mol/L) = -1663.673613  
Lowest Frequency = 10.70

HF SCF energy (TZ) = -1655.127323  
HF SCF energy (QZ) = -1655.226565  
Correlation energy (DZ) = -5.864154  
Correlation energy (TZ) = -7.176307  
DLPNO-CCSD(T1)/CBS = -1663.201885

**cis-G<sup>A</sup>**

CPCM (MeOH)  
wB97X-D3 SCF (DZ) = -1664.892088  
G (1 atm) = -1664.435048  
qh G-E (1 mol/L) = 0.471283  
qh G-E (24.56 mol/L) = 0.474305  
Lowest Frequency = 0.84

HF SCF energy (TZ) = -1655.134819  
HF SCF energy (QZ) = -1655.233846  
Correlation energy (DZ) = -5.857696  
Correlation energy (TZ) = -7.168244  
DLPNO-CCSD(T1)/CBS = -1663.197728

\*xyz 0 1

|    |           |           |           |
|----|-----------|-----------|-----------|
| Ru | -0.194783 | 0.394988  | 0.449568  |
| C  | -0.739236 | 1.564586  | -1.063185 |
| N  | 1.618507  | 0.693347  | -0.544276 |
| H  | 0.027141  | 3.156230  | -0.078093 |
| C  | 0.260651  | 1.823013  | -2.055668 |
| C  | -1.972361 | 2.229829  | -1.252424 |
| N  | -0.506908 | -1.413359 | -0.513559 |
| O  | -0.136314 | -0.958770 | 2.384898  |
| O  | 0.234084  | 1.945901  | 1.869876  |
| O  | -1.946059 | 0.038737  | 1.642946  |
| C  | 2.877344  | 0.256407  | -0.056241 |
| C  | 1.551375  | 1.322521  | -1.690076 |
| O  | 0.384851  | 3.785272  | 0.594680  |
| C  | 0.013402  | 2.608214  | -3.194675 |
| C  | -2.213784 | 3.015896  | -2.376294 |
| H  | -2.760948 | 2.117822  | -0.498103 |
| C  | 0.711668  | -2.099768 | -0.862189 |
| C  | -1.547612 | -2.183952 | -0.587884 |
| C  | -1.368522 | -0.714618 | -2.492363 |
| C  | 0.492683  | 3.143740  | 1.738898  |
| C  | 3.912689  | -0.145266 | -0.908955 |
| C  | 3.077029  | 0.213587  | 1.328909  |
| H  | 2.449871  | 1.532189  | -2.286286 |
| C  | -1.231884 | 3.193875  | -3.364155 |
| H  | 0.810521  | 2.767318  | -3.928902 |
| H  | -3.185002 | 3.508268  | -2.490700 |
| C  | 1.123580  | -2.120574 | -2.193103 |
| C  | 1.440884  | -2.766857 | 0.120776  |
| C  | -2.947757 | -1.803513 | -0.425117 |
| H  | -1.366906 | -3.251648 | -0.798853 |
| C  | -2.179339 | -1.335778 | 3.589430  |
| C  | 0.961881  | 3.989213  | 2.865591  |
| C  | 5.129174  | -0.567441 | -0.381583 |
| H  | 3.755890  | -0.165214 | -1.990453 |
| C  | 4.297049  | -0.205571 | 1.848344  |
| H  | 2.260133  | 0.516401  | 1.988398  |
| H  | -1.440774 | 3.809514  | -4.242382 |
| C  | 2.275356  | -2.823121 | -2.543016 |
| H  | 0.531708  | -1.588039 | -2.943863 |
| C  | 2.585599  | -3.472839 | -0.240653 |
| H  | 1.091568  | -2.718857 | 1.155911  |
| C  | -3.470769 | -0.655137 | -1.026715 |
| C  | -3.800231 | -2.657860 | 0.286834  |
| H  | -1.625959 | -1.309125 | 4.538680  |
| H  | -2.352897 | -2.395616 | 3.341662  |
| H  | -3.152372 | -0.839744 | 3.700793  |
| H  | 1.974355  | 4.357311  | 2.641401  |
| H  | 0.972512  | 3.415033  | 3.797568  |
| H  | 0.312231  | 4.870556  | 2.964032  |
| C  | 5.329312  | -0.599696 | 0.997141  |
| H  | 5.924329  | -0.889964 | -1.059128 |
| H  | 4.441496  | -0.226616 | 2.931700  |
| C  | 3.005128  | -3.503944 | -1.569864 |
| H  | 2.597893  | -2.845394 | -3.587357 |
| H  | 3.155820  | -4.003902 | 0.526420  |
| C  | -4.815190 | -0.337582 | -0.874604 |
| H  | -2.812047 | -0.020746 | -1.622149 |
| C  | -5.140045 | -2.325698 | 0.458255  |
| H  | -3.398886 | -3.576120 | 0.727347  |
| H  | 6.284161  | -0.937623 | 1.407499  |
| H  | 3.904519  | -4.059101 | -1.848262 |
| C  | -5.649149 | -1.162190 | -0.119043 |
| H  | -5.216092 | 0.561613  | -1.351151 |
| H  | -5.794573 | -2.983097 | 1.035895  |

SMD (MeOH)

|                           |              |
|---------------------------|--------------|
| HF SCF energy (TZ) =      | -1655.152198 |
| HF SCF energy (QZ) =      | -1655.250979 |
| Correlation energy (DZ) = | -5.851727    |
| Correlation energy (TZ) = | -7.163822    |
| DLPNO-CCSD(T1)/CBS =      | -1663.211269 |

\* xyz 0 1

|    |           |           |           |
|----|-----------|-----------|-----------|
| Ru | -0.238928 | -0.221166 | -0.126167 |
| C  | 0.696199  | -0.131300 | 1.646953  |
| N  | -1.752322 | -0.844071 | 1.189823  |
| C  | -0.044105 | -0.631502 | 2.762509  |
| C  | 1.969694  | 0.396708  | 1.969983  |
| N  | 0.290272  | -2.205063 | -0.570610 |
| C  | -3.098358 | -1.118976 | 0.810028  |
| C  | -1.404393 | -0.990047 | 2.431878  |
| C  | 0.464154  | -0.677957 | 4.070819  |
| C  | 2.480627  | 0.359000  | 3.266463  |
| C  | -0.810855 | -3.142147 | -0.530641 |
| C  | 1.333885  | -2.705857 | -1.135842 |
| C  | -3.821029 | -2.178455 | 1.367148  |
| C  | -3.690834 | -0.315821 | -0.170107 |
| C  | 1.741126  | -0.194210 | 4.323076  |
| C  | -0.883846 | -4.065538 | 0.510332  |
| C  | -1.760959 | -3.140621 | -1.551488 |
| C  | 2.657276  | -2.071157 | -1.272069 |
| C  | -5.127352 | -2.425705 | 0.949687  |
| C  | -4.998266 | -0.565745 | -0.579422 |
| C  | -1.911130 | -5.009152 | 0.519285  |
| C  | -2.780098 | -4.091045 | -1.536517 |
| C  | 3.352074  | -1.606674 | -0.154224 |
| C  | 3.261589  | -2.027237 | -2.534435 |
| C  | -5.720900 | -1.623879 | -0.024626 |
| C  | -2.857147 | -5.027746 | -0.505195 |
| C  | 4.623215  | -1.054757 | -0.303231 |
| C  | 4.523376  | -1.458048 | -2.683788 |
| C  | 5.205046  | -0.967176 | -1.567761 |
| H  | 2.578483  | 0.845395  | 1.178861  |
| H  | -2.126626 | -1.305068 | 3.195120  |
| H  | -0.150323 | -1.078909 | 4.882282  |
| H  | 3.474464  | 0.771204  | 3.464430  |
| H  | 1.244274  | -3.713569 | -1.567579 |
| H  | -3.348286 | -2.838718 | 2.096237  |
| H  | -3.114865 | 0.504424  | -0.601060 |
| H  | 2.156264  | -0.220791 | 5.332678  |
| H  | -0.131904 | -4.043241 | 1.302287  |
| H  | -1.679985 | -2.395174 | -2.344336 |
| H  | -5.676402 | -3.266738 | 1.379167  |
| H  | -5.454370 | 0.069633  | -1.341933 |
| H  | -1.967751 | -5.736809 | 1.331907  |
| H  | -3.520199 | -4.098895 | -2.339804 |
| H  | 2.894965  | -1.687438 | 0.831597  |
| H  | 2.732646  | -2.424856 | -3.404368 |
| H  | -6.741713 | -1.826651 | -0.355752 |
| H  | -3.658518 | -5.769605 | -0.497166 |
| H  | 5.160604  | -0.691343 | 0.575669  |
| H  | 4.981310  | -1.403307 | -3.673725 |
| H  | 6.198484  | -0.528130 | -1.683961 |
| O  | -1.003878 | 1.793168  | -0.159954 |
| O  | -0.606382 | 2.526901  | 1.916989  |
| C  | -1.116787 | 2.656669  | 0.711703  |
| C  | -1.857695 | 3.930533  | 0.484143  |
| H  | -0.119789 | 1.669081  | 1.955153  |
| H  | -2.758633 | 3.929247  | 1.115038  |
| H  | -2.142903 | 4.015070  | -0.568913 |

H -6.704477 -0.906825 0.006469  
\*

-----

G<sup>A</sup>

CPCM (MeOH)  
M06 SCF (DZ) = -1664.127788  
G (1 atm) = -1663.687978  
qh-G (1 mol/L) = -1663.676564  
qh-G (24.56 mol/L) = -1663.673541  
Lowest Frequency = 14.41

HF SCF energy (TZ) = -1655.134382  
HF SCF energy (QZ) = -1655.233309  
Correlation energy (DZ) = -5.855773  
Correlation energy (TZ) = -7.166994  
DLPNO-CCSD(T1)/CBS = -1663.196304

\*xyz 0 1

|    |           |           |           |
|----|-----------|-----------|-----------|
| Ru | -0.290684 | 0.029198  | -0.025789 |
| C  | 0.336692  | -0.506837 | 1.786015  |
| N  | -2.078909 | -0.657707 | 0.808742  |
| H  | 0.549053  | 1.466608  | 2.359781  |
| C  | -0.691735 | -1.020188 | 2.646921  |
| C  | 1.623722  | -0.425567 | 2.374263  |
| N  | 1.564824  | 0.617611  | -0.797301 |
| O  | -1.100896 | -0.011780 | -2.208918 |
| O  | -0.802786 | 2.019224  | 0.559486  |
| O  | -0.253367 | -1.750562 | -1.178447 |
| C  | -3.298472 | -0.800397 | 0.105367  |
| C  | -1.983801 | -1.096302 | 2.034565  |
| O  | 0.290927  | 2.412835  | 2.480917  |
| C  | -0.447521 | -1.421656 | 3.968576  |
| C  | 1.860496  | -0.819294 | 3.690364  |
| H  | 2.464553  | -0.040433 | 1.783949  |
| C  | 1.580314  | 2.033172  | -1.044333 |
| C  | 2.675109  | 0.030124  | -1.131910 |
| C  | -0.831586 | -1.240610 | -2.198785 |
| C  | -0.489289 | 2.771643  | 1.484350  |
| C  | -4.004834 | -2.008062 | 0.119592  |
| C  | -3.777702 | 0.273277  | -0.652205 |
| H  | -2.861148 | -1.498169 | 2.562688  |
| C  | 0.830932  | -1.321295 | 4.498119  |
| H  | -1.273681 | -1.809567 | 4.574549  |
| H  | 2.871820  | -0.733045 | 4.100709  |
| C  | 0.823721  | 2.570747  | -2.086496 |
| C  | 2.328113  | 2.866724  | -0.212102 |
| C  | 3.101293  | -1.355373 | -0.975492 |
| H  | 3.438664  | 0.667313  | -1.608308 |
| C  | -1.228729 | -2.130593 | -3.333276 |
| C  | -0.961462 | 4.177668  | 1.560234  |
| C  | -5.192091 | -2.129371 | -0.599731 |
| H  | -3.604957 | -2.859875 | 0.677079  |
| C  | -4.967174 | 0.147564  | -1.359858 |
| H  | -3.202475 | 1.202476  | -0.667530 |
| H  | 1.034021  | -1.625873 | 5.527410  |
| C  | 0.816814  | 3.947782  | -2.286879 |
| H  | 0.237835  | 1.895136  | -2.714555 |
| C  | 2.307455  | 4.246246  | -0.414963 |
| H  | 2.910579  | 2.426537  | 0.603434  |

H -1.235002 4.782052 0.788504  
O -0.815910 -0.158912 -2.384373  
O 1.140879 0.476840 -1.623767  
C 0.351090 0.276834 -2.601718  
C 0.834803 0.512657 -4.006907  
H 0.011514 0.851697 -4.648121  
H 1.204763 -0.444691 -4.406115  
H 1.660040 1.235037 -4.022870

\*

-----

G<sup>A</sup>

CPCM (MeOH)  
wB97X-D3 SCF (DZ) = -1664.894932  
G (1 atm) = -1664.439146  
qh G-E (1 mol/L) = 0.471990  
qh G-E (24.56 mol/L) = 0.475012  
Lowest Frequency = 8.61

HF SCF energy (TZ) = -1655.140565  
HF SCF energy (QZ) = -1655.239440  
Correlation energy (DZ) = -5.851070  
Correlation energy (TZ) = -7.160702  
DLPNO-CCSD(T1)/CBS = -1663.195199

SMD (MeOH)

HF SCF energy (TZ) = -1655.156675  
HF SCF energy (QZ) = -1655.255365  
Correlation energy (DZ) = -5.845527  
Correlation energy (TZ) = -7.156383  
DLPNO-CCSD(T1)/CBS = -1663.207464

\* xyz 0 1

|    |           |           |           |
|----|-----------|-----------|-----------|
| Ru | -0.268766 | 0.001568  | -0.008803 |
| C  | 0.354644  | -0.472695 | 1.838580  |
| N  | -2.045523 | -0.706512 | 0.821898  |
| H  | 0.322004  | 1.498220  | 2.298327  |
| C  | -0.650717 | -1.080967 | 2.657516  |
| C  | 1.618936  | -0.328013 | 2.464532  |
| N  | 1.599967  | 0.641564  | -0.788212 |
| O  | -1.028119 | -0.183113 | -2.181225 |
| O  | -0.892600 | 2.004173  | 0.421136  |
| O  | -0.119440 | -1.838796 | -1.072715 |
| C  | -3.288864 | -0.788368 | 0.134412  |
| C  | -1.947595 | -1.181751 | 2.024171  |
| O  | 0.039015  | 2.437914  | 2.407608  |
| C  | -0.412882 | -1.527854 | 3.965098  |
| C  | 1.858642  | -0.764481 | 3.768130  |
| H  | 2.442912  | 0.132538  | 1.908566  |
| C  | 1.583042  | 2.058733  | -1.049418 |
| C  | 2.699156  | 0.072161  | -1.151961 |
| C  | -0.684169 | -1.395578 | -2.127888 |
| C  | -0.678196 | 2.775200  | 1.358528  |
| C  | -3.945558 | -2.011365 | -0.023417 |
| C  | -3.828968 | 0.375050  | -0.422725 |
| H  | -2.817966 | -1.616108 | 2.533700  |
| C  | 0.849079  | -1.371343 | 4.527230  |
| H  | -1.221554 | -1.993108 | 4.537041  |
| H  | 2.853200  | -0.632674 | 4.204355  |
| C  | 0.910552  | 2.547602  | -2.169878 |
| C  | 2.203320  | 2.931833  | -0.156266 |
| C  | 3.139234  | -1.323439 | -1.003049 |
| H  | 3.448834  | 0.712151  | -1.639970 |
| C  | -0.962778 | -2.341199 | -3.262667 |
| C  | -1.225876 | 4.161707  | 1.393983  |
| C  | -5.152177 | -2.064508 | -0.723629 |

|   |           |           |           |
|---|-----------|-----------|-----------|
| C | 2.436550  | -2.336427 | -0.221255 |
| C | 4.309685  | -1.698509 | -1.609171 |
| H | -1.116793 | -1.605433 | -4.291524 |
| H | -2.295725 | -2.383519 | -3.215958 |
| H | -0.649491 | -3.062810 | -3.336423 |
| H | -1.482414 | 4.344448  | 2.514332  |
| H | -1.623357 | 4.406332  | 0.718284  |
| H | -0.088207 | 4.847755  | 1.543950  |
| C | -5.678853 | -1.053414 | -1.338222 |
| H | -5.734077 | -3.078565 | -0.589083 |
| H | -5.342054 | 0.995048  | -1.939577 |
| C | 1.551677  | 4.790257  | -1.451146 |
| H | 0.228865  | 4.369222  | -3.106478 |
| H | 2.889467  | 4.897457  | 0.242588  |
| C | 2.966978  | -3.616196 | -0.118226 |
| H | 1.506600  | -2.080517 | 0.284802  |
| C | 4.830795  | -2.982640 | -1.513851 |
| H | 4.842516  | -0.937307 | -2.187738 |
| H | -6.608064 | -1.151414 | -1.904948 |
| H | 1.536417  | 5.871240  | -1.610537 |
| C | 4.158429  | -3.947160 | -0.765161 |
| H | 2.443488  | -4.368509 | 0.477291  |
| H | 5.767237  | -3.230308 | -2.019335 |
| H | 4.565829  | -4.957898 | -0.680330 |

\*

-----

|   |           |           |           |
|---|-----------|-----------|-----------|
| H | -3.499174 | -2.920964 | 0.385077  |
| C | -5.036471 | 0.315202  | -1.111926 |
| H | -3.288289 | 1.316710  | -0.306855 |
| H | 1.050222  | -1.711131 | 5.545299  |
| C | 0.856817  | 3.922228  | -2.390993 |
| H | 0.422089  | 1.842648  | -2.844964 |
| C | 2.137853  | 4.307687  | -0.381418 |
| H | 2.716650  | 2.530064  | 0.720221  |
| C | 2.570765  | -2.260345 | -0.127925 |
| C | 4.274175  | -1.688866 | -1.745928 |
| H | -1.042739 | -1.794434 | -4.210076 |
| H | -1.923020 | -2.843334 | -3.066622 |
| H | -0.181327 | -3.108995 | -3.326989 |
| H | -2.019461 | 4.208594  | 2.154409  |
| H | -1.634550 | 4.426932  | 0.413777  |
| H | -0.433798 | 4.863082  | 1.687235  |
| C | -5.702281 | -0.904130 | -1.265528 |
| H | -5.659823 | -3.023520 | -0.849475 |
| H | -5.460695 | 1.227736  | -1.536876 |
| C | 1.464082  | 4.806255  | -1.496282 |
| H | 0.332123  | 4.306034  | -3.268868 |
| H | 2.616906  | 4.991928  | 0.322493  |
| C | 3.119478  | -3.534029 | -0.016265 |
| H | 1.700390  | -1.984500 | 0.461234  |
| C | 4.814145  | -2.967830 | -1.642023 |
| H | 4.740127  | -0.954491 | -2.408622 |
| H | -6.645562 | -0.948924 | -1.814144 |
| H | 1.412681  | 5.883250  | -1.669586 |
| C | 4.235209  | -3.894551 | -0.774796 |
| H | 2.671256  | -4.253135 | 0.673002  |
| H | 5.697946  | -3.234334 | -2.225320 |
| H | 4.661273  | -4.896057 | -0.679662 |

\*

-----

#### G<sup>c</sup>

CPCM (MeOH)  
M06 SCF (DZ) = -1496.968066  
G (1 atm) = -1496.517267  
qh-G (1 mol/L) = -1496.507182  
qh-G (24.56 mol/L) = -1496.504160  
Lowest Frequency = 17.33

HF SCF energy (TZ) = -1488.743687  
HF SCF energy (QZ) = -1488.834119  
Correlation energy (DZ) = -5.388829  
Correlation energy (TZ) = -6.595755  
DLPNO-CCSD(T1)/CBS = -1496.162372

#### \*xyz 0 1

|    |           |           |           |
|----|-----------|-----------|-----------|
| Ru | 0.034410  | 0.502772  | -0.278309 |
| C  | -1.372176 | -0.812798 | -1.506755 |
| C  | -0.058537 | -1.364895 | -1.564533 |
| C  | -2.415795 | -1.514415 | -0.822231 |
| H  | -1.659158 | -0.065857 | -2.250720 |
| C  | -0.923130 | 0.004576  | 1.380414  |
| N  | 1.515554  | -0.555718 | 0.756833  |
| O  | -1.171831 | 2.031483  | -1.194159 |
| O  | 1.010850  | 2.208236  | 0.581003  |
| O  | 0.663589  | 1.582233  | -2.312576 |
| C  | 0.207894  | -2.635788 | -0.959376 |
| H  | 0.630472  | -1.016107 | -2.344197 |
| C  | -3.865303 | -1.073877 | -0.892835 |
| C  | -2.081569 | -2.658322 | -0.132318 |
| C  | -0.156229 | -0.677926 | 2.370169  |
| C  | -2.253843 | 0.314086  | 1.732876  |

#### G<sup>c</sup>

CPCM (MeOH)  
WB97X-D3 SCF (DZ) = -1497.664307  
G (1 atm) = -1497.197771  
qh G-E (1 mol/L) = 0.479183  
qh G-E (24.56 mol/L) = 0.482206  
Lowest Frequency = 0.95

HF SCF energy (TZ) = -1488.757140  
HF SCF energy (QZ) = -1488.846130  
Correlation energy (DZ) = -5.376615  
Correlation energy (TZ) = -6.583484  
DLPNO-CCSD(T1)/CBS = -1496.161645

#### SMD (MeOH)

HF SCF energy (TZ) = -1488.770487  
HF SCF energy (QZ) = -1488.859330  
Correlation energy (DZ) = -5.372058  
Correlation energy (TZ) = -6.579916  
DLPNO-CCSD(T1)/CBS = -1496.171812

#### \* xyz 0 1

|    |           |           |           |
|----|-----------|-----------|-----------|
| Ru | 0.033138  | 0.523409  | -0.271299 |
| C  | -0.937411 | 0.023549  | 1.399776  |
| N  | 1.515810  | -0.553756 | 0.757200  |
| C  | -0.170629 | -0.686236 | 2.366542  |
| C  | -2.263530 | 0.325345  | 1.782079  |
| C  | 2.854112  | -0.731129 | 0.296046  |
| C  | 1.188230  | -0.937112 | 1.952973  |
| C  | -0.682778 | -1.087383 | 3.608854  |
| C  | -2.780427 | -0.067631 | 3.018220  |



|   |           |           |           |
|---|-----------|-----------|-----------|
| C | 2.839480  | -0.735751 | 0.282019  |
| C | 1.190470  | -0.924775 | 1.967884  |
| C | -0.368657 | 2.282873  | -2.157699 |
| C | 0.566111  | 3.080614  | 1.332054  |
| C | 1.495495  | -3.346727 | -1.242500 |
| C | -0.783877 | -3.218842 | -0.205238 |
| C | -4.078935 | 0.299202  | -1.512551 |
| C | -4.698913 | -2.107064 | -1.651658 |
| H | -4.239123 | -1.043955 | 0.151086  |
| H | -2.855585 | -3.185674 | 0.438340  |
| C | -0.688696 | -1.050011 | 3.614762  |
| C | -2.781096 | -0.052777 | 2.970093  |
| H | -2.891435 | 0.850874  | 1.019665  |
| C | 3.275682  | 0.057942  | -0.785230 |
| C | 3.707709  | -1.702049 | 0.811386  |
| H | 1.925833  | -1.363014 | 2.655610  |
| C | -0.667911 | 3.439082  | -3.061460 |
| C | 1.323923  | 4.317997  | 1.645726  |
| O | -0.606183 | 3.008377  | 1.917576  |
| H | 1.792415  | -4.000386 | -0.406319 |
| H | 1.393025  | -3.990722 | -2.134444 |
| H | 2.321809  | -2.648698 | -1.446645 |
| H | -0.587342 | -4.175999 | 0.290835  |
| H | -5.134285 | 0.599798  | -1.412958 |
| H | -3.849115 | 0.284864  | -2.593211 |
| H | -3.446840 | 1.077136  | -1.057631 |
| H | -5.759882 | -1.807218 | -1.683195 |
| H | -4.342388 | -2.194391 | -2.693544 |
| H | -4.641732 | -3.106589 | -1.193438 |
| C | -2.007812 | -0.743726 | 3.914254  |
| H | -0.057977 | -1.574860 | 4.340221  |
| H | -3.818892 | 0.202208  | 3.207834  |
| C | 4.556531  | -0.106624 | -1.305548 |
| H | 2.592915  | 0.799397  | -1.208534 |
| C | 4.985459  | -1.858197 | 0.286998  |
| H | 3.373453  | -2.371476 | 1.607827  |
| H | -0.191114 | 3.301897  | -4.040576 |
| H | -0.259749 | 4.356649  | -2.608285 |
| H | -1.751170 | 3.577162  | -3.177817 |
| H | 2.319160  | 4.285823  | 1.191191  |
| H | 1.399933  | 4.439500  | 2.735362  |
| H | 0.765323  | 5.184603  | 1.261390  |
| H | -1.021603 | 2.139303  | 1.701405  |
| H | -2.439005 | -1.026809 | 4.877347  |
| C | 5.418826  | -1.062440 | -0.773579 |
| H | 4.881091  | 0.521137  | -2.139390 |
| H | 5.644699  | -2.624637 | 0.702608  |
| H | 6.421364  | -1.194728 | -1.187561 |

\*

-----

G<sup>S</sup>

CPCM (MeOH)  
M06 SCF (DZ) = -1223.435119  
G (1 atm) = -1223.136104  
qh-G (1 mol/L) = -1223.126798  
qh-G (24.56 mol/L) = -1223.123776  
Lowest Frequency = 27.32

|   |           |           |           |
|---|-----------|-----------|-----------|
| C | 3.320985  | 0.117824  | -0.712258 |
| C | 3.695791  | -1.736879 | 0.791046  |
| C | -1.998768 | -0.781181 | 3.936398  |
| C | 4.615878  | -0.026942 | -1.208154 |
| C | 4.987979  | -1.874516 | 0.291836  |
| C | 5.456321  | -1.020837 | -0.708506 |
| H | -2.912192 | 0.877204  | 1.094338  |
| H | 1.917382  | -1.396245 | 2.630546  |
| H | -0.047009 | -1.633667 | 4.311881  |
| H | -3.814010 | 0.184618  | 3.272332  |
| H | 2.657094  | 0.887483  | -1.108954 |
| H | 3.336428  | -2.442291 | 1.542215  |
| H | -2.416683 | -1.085275 | 4.898262  |
| H | 4.966654  | 0.644464  | -1.995090 |
| H | 5.629404  | -2.669069 | 0.679590  |
| H | 6.468417  | -1.137401 | -1.101851 |
| C | -1.407454 | -0.842428 | -1.543940 |
| C | -0.103467 | -1.384019 | -1.616157 |
| C | -2.443179 | -1.540135 | -0.849451 |
| C | 0.185299  | -2.644989 | -1.008276 |
| C | -3.895695 | -1.080011 | -0.887104 |
| C | -2.100913 | -2.690952 | -0.172022 |
| C | 1.496018  | -3.335632 | -1.280909 |
| C | -0.799879 | -3.241444 | -0.252845 |
| C | -4.100301 | 0.301585  | -1.509148 |
| C | -4.770940 | -2.114664 | -1.609739 |
| H | -1.690141 | -0.054095 | -2.240056 |
| H | 0.592009  | -0.997305 | -2.365764 |
| H | -4.236440 | -1.031980 | 0.162897  |
| H | -2.862841 | -3.226346 | 0.402783  |
| H | 1.854664  | -3.885480 | -0.398375 |
| H | 1.378591  | -4.065582 | -2.099157 |
| H | 2.275972  | -2.624139 | -1.583740 |
| H | -0.594348 | -4.192253 | 0.248030  |
| H | -5.145485 | 0.621300  | -1.379695 |
| H | -3.893380 | 0.285830  | -2.592338 |
| H | -3.443971 | 1.061881  | -1.062873 |
| H | -5.827981 | -1.804377 | -1.598854 |
| H | -4.457946 | -2.218112 | -2.662145 |
| H | -4.704004 | -3.106669 | -1.138814 |
| O | -1.164059 | 2.036862  | -1.230033 |
| O | 0.700701  | 1.561626  | -2.281713 |
| C | -0.336440 | 2.270736  | -2.174153 |
| C | -0.598571 | 3.415332  | -3.113429 |
| H | -0.112378 | 3.240254  | -4.080892 |
| H | -0.173220 | 4.329331  | -2.670761 |
| H | -1.676884 | 3.568251  | -3.246440 |
| O | 1.004348  | 2.223015  | 0.562089  |
| C | 0.565016  | 3.099505  | 1.312341  |
| C | 1.310771  | 4.361798  | 1.581023  |
| O | -0.584387 | 3.000466  | 1.938302  |
| H | 2.232637  | 4.388046  | 0.992382  |
| H | 1.539779  | 4.421774  | 2.654555  |
| H | 0.668985  | 5.217241  | 1.327883  |
| H | -0.972276 | 2.112739  | 1.757988  |

\*

-----

G<sup>S</sup>

CPCM (MeOH)  
wB97X-D3 SCF (DZ) = -1223.941314  
G (1 atm) = -1223.629658  
qh G-E (1 mol/L) = 0.322728  
qh G-E (24.56 mol/L) = 0.325751  
Lowest Frequency = 18.66

HF SCF energy (TZ) = -1216.921817  
 HF SCF energy (QZ) = -1216.997688  
 Correlation energy (DZ) = -4.195928  
 Correlation energy (TZ) = -5.198125  
 DLPNO-CCSD(T1)/CBS = -1222.804294

HF SCF energy (TZ) = -1216.928306  
 HF SCF energy (QZ) = -1217.002861  
 Correlation energy (DZ) = -4.191499  
 Correlation energy (TZ) = -5.193294  
 DLPNO-CCSD(T1)/CBS = -1222.804004

\*xyz 0 1

|    |           |           |           |
|----|-----------|-----------|-----------|
| Ru | -0.364871 | 0.617190  | 0.012776  |
| C  | -1.705541 | -0.831663 | -0.162788 |
| H  | -1.237785 | -1.184598 | 1.720154  |
| C  | -1.185262 | -2.085930 | -0.626147 |
| C  | -3.107889 | -0.779255 | 0.017360  |
| N  | 0.847837  | -0.957199 | -0.516965 |
| O  | 1.210830  | 2.336175  | -0.122166 |
| O  | -1.101614 | 1.433061  | -1.806589 |
| O  | -1.836317 | 2.233548  | 0.081882  |
| O  | 0.340495  | 0.425758  | 2.008880  |
| O  | -0.875986 | -1.342795 | 2.632881  |
| C  | -2.006301 | -3.195142 | -0.887232 |
| C  | 0.235889  | -2.085866 | -0.786759 |
| C  | -3.918026 | -1.879901 | -0.246893 |
| H  | -3.568487 | 0.150715  | 0.371374  |
| C  | 2.250829  | -0.873018 | -0.710483 |
| C  | 1.255934  | 3.289415  | 0.933374  |
| H  | 1.002840  | 2.799562  | -0.946821 |
| C  | -1.874062 | 2.236072  | -1.182955 |
| C  | 0.035026  | -0.424876 | 2.852811  |
| C  | -3.376047 | -3.094175 | -0.698695 |
| H  | -1.557988 | -4.130474 | -1.240009 |
| H  | 0.801493  | -2.973461 | -1.102696 |
| H  | -4.999950 | -1.800121 | -0.097481 |
| C  | 3.049374  | -0.285592 | 0.277063  |
| C  | 2.844004  | -1.350722 | -1.884548 |
| H  | 1.994116  | 4.078440  | 0.719781  |
| H  | 1.563036  | 2.749171  | 1.838649  |
| H  | 0.266440  | 3.744518  | 1.107713  |
| C  | -2.814323 | 3.115730  | -1.934949 |
| C  | 0.667647  | -0.483671 | 4.193406  |
| H  | -4.028704 | -3.947766 | -0.897804 |
| C  | 4.426305  | -0.207503 | 0.100553  |
| H  | 2.573322  | 0.095510  | 1.183606  |
| C  | 4.223410  | -1.261423 | -2.056805 |
| H  | 2.214409  | -1.772543 | -2.672985 |
| H  | -2.401697 | 3.377993  | -2.917921 |
| H  | -3.754386 | 2.564645  | -2.098675 |
| H  | -3.045956 | 4.020912  | -1.359021 |
| H  | 1.165478  | -1.456760 | 4.317798  |
| H  | 1.394179  | 0.326812  | 4.311926  |
| H  | -0.108338 | -0.416667 | 4.969847  |
| C  | 5.019993  | -0.694513 | -1.064830 |
| H  | 5.044489  | 0.240325  | 0.883042  |
| H  | 4.676052  | -1.632014 | -2.980181 |
| H  | 6.101872  | -0.623955 | -1.201706 |

\*

\* xyz 0 1

|    |           |           |           |
|----|-----------|-----------|-----------|
| Ru | -0.351102 | 0.603311  | 0.022111  |
| C  | -1.705811 | -0.871747 | -0.126069 |
| C  | -1.171609 | -2.106106 | -0.612054 |
| C  | -3.109099 | -0.853110 | 0.055071  |
| N  | 0.862746  | -0.960918 | -0.545494 |
| C  | -1.965783 | -3.227368 | -0.893938 |
| C  | 0.261469  | -2.084300 | -0.803651 |
| C  | -3.904005 | -1.964760 | -0.225619 |
| C  | 2.271561  | -0.874631 | -0.747867 |
| C  | -3.340476 | -3.158465 | -0.698664 |
| C  | 3.089317  | -0.470845 | 0.311731  |
| C  | 2.831503  | -1.160332 | -1.995549 |
| C  | 4.465570  | -0.378139 | 0.125837  |
| C  | 4.211701  | -1.057316 | -2.176055 |
| C  | 5.032020  | -0.669771 | -1.117845 |
| H  | -3.588033 | 0.060655  | 0.421742  |
| H  | -1.504603 | -4.145672 | -1.269783 |
| H  | 0.827586  | -2.961009 | -1.143001 |
| H  | -4.986098 | -1.905979 | -0.074995 |
| H  | -3.975093 | -4.020871 | -0.913530 |
| H  | 2.630884  | -0.236287 | 1.273508  |
| H  | 2.182184  | -1.447617 | -2.825771 |
| H  | 5.102145  | -0.073057 | 0.959467  |
| H  | 4.644246  | -1.278127 | -3.154440 |
| H  | 6.111616  | -0.588710 | -1.261288 |
| O  | 0.394501  | 0.405837  | 2.017892  |
| O  | -1.122707 | -1.052937 | 2.747678  |
| C  | -0.062000 | -0.302500 | 2.922099  |
| C  | 0.559379  | -0.376334 | 4.274677  |
| H  | -1.408532 | -0.929745 | 1.802735  |
| H  | 1.009708  | -1.372451 | 4.396909  |
| H  | 1.331087  | 0.392840  | 4.378288  |
| H  | -0.213020 | -0.258251 | 5.045887  |
| O  | 1.247983  | 2.224492  | -0.120675 |
| C  | 1.343607  | 3.233472  | 0.887277  |
| H  | 1.139064  | 2.659532  | -0.978031 |
| H  | 2.202122  | 3.891707  | 0.687088  |
| H  | 1.496210  | 2.713908  | 1.840349  |
| H  | 0.419271  | 3.829316  | 0.940647  |
| O  | -1.116665 | 1.412305  | -1.796071 |
| O  | -1.839193 | 2.211591  | 0.099352  |
| C  | -1.883833 | 2.213400  | -1.166397 |
| C  | -2.834718 | 3.097480  | -1.916230 |
| H  | -2.391130 | 3.418719  | -2.866951 |
| H  | -3.742473 | 2.516373  | -2.140382 |
| H  | -3.115726 | 3.966365  | -1.309221 |

\*

G<sup>25</sup>

CPCM (MeOH)  
 M06 SCF (DZ) = -1339.120407  
 G (1 atm) = -1338.769325  
 qh-G (1 mol/L) = -1338.759917  
 qh-G (24.56 mol/L) = -1338.756894  
 Lowest Frequency = 6.77

HF SCF energy (TZ) = -1332.025720  
 HF SCF energy (QZ) = -1332.109802

Correlation energy (DZ) = -4.579345  
 Correlation energy (TZ) = -5.674714  
 DLPNO-CCSD(T1)/CBS = -1338.449915

\*xyz 0 1

|    |           |           |           |
|----|-----------|-----------|-----------|
| Ru | 0.246369  | -0.258138 | -0.120639 |
| C  | 1.256707  | 1.441956  | 0.060239  |
| N  | -1.296339 | 1.086434  | 0.037430  |
| C  | 2.652387  | 1.662512  | 0.007038  |
| C  | 0.446534  | 2.621655  | 0.141210  |
| H  | 1.893367  | 0.499913  | 1.763868  |
| O  | -0.921050 | -2.253883 | -0.641314 |
| O  | 0.246048  | -0.092498 | -2.278865 |
| O  | 1.984621  | -1.521396 | -0.261288 |
| O  | 0.066187  | -0.855170 | 1.894028  |
| C  | -2.664397 | 0.729382  | -0.042004 |
| C  | -0.959828 | 2.348109  | 0.123570  |
| C  | 3.192812  | 2.946913  | 0.043920  |
| H  | 3.326843  | 0.801013  | -0.078989 |
| C  | 0.993046  | 3.912632  | 0.173684  |
| O  | 1.922281  | 0.114305  | 2.677635  |
| C  | -1.043024 | -3.272906 | 0.335043  |
| H  | -0.265241 | -2.558064 | -1.307161 |
| C  | 1.057503  | 0.855085  | -2.961621 |
| H  | 0.611722  | -0.999892 | -2.471681 |
| C  | 2.153783  | -2.332474 | -1.222008 |
| C  | 0.870429  | -0.656755 | 2.811670  |
| C  | -3.525725 | 1.347177  | -0.953870 |
| C  | -3.147456 | -0.283957 | 0.792556  |
| H  | -1.724573 | 3.135575  | 0.184787  |
| C  | 2.371023  | 4.079420  | 0.128970  |
| H  | 4.279480  | 3.074697  | -0.000513 |
| H  | 0.327742  | 4.781750  | 0.224506  |
| H  | -1.469687 | -4.190655 | -0.102961 |
| H  | -1.721403 | -2.913136 | 1.121345  |
| H  | -0.070202 | -3.513328 | 0.800446  |
| H  | 0.913133  | 0.754096  | -4.048881 |
| H  | 2.125029  | 0.719782  | -2.715107 |
| H  | 0.749448  | 1.862165  | -2.647273 |
| C  | 3.406133  | -3.164714 | -1.217703 |
| O  | 1.342683  | -2.489168 | -2.181453 |
| C  | 0.714482  | -1.268970 | 4.153979  |
| C  | -4.863233 | 0.960597  | -1.017865 |
| H  | -3.134769 | 2.115941  | -1.626562 |
| C  | -4.484512 | -0.658412 | 0.728249  |
| H  | -2.456475 | -0.755040 | 1.496923  |
| H  | 2.810711  | 5.079507  | 0.153690  |
| H  | 4.004696  | -2.918327 | -2.108223 |
| H  | 3.136756  | -4.228087 | -1.302557 |
| H  | 4.008369  | -3.001805 | -0.315512 |
| H  | 1.624280  | -1.832134 | 4.407489  |
| H  | -0.158805 | -1.928893 | 4.176840  |
| H  | 0.606599  | -0.473962 | 4.906594  |
| C  | -5.347554 | -0.039490 | -0.177849 |
| H  | -5.529375 | 1.442274  | -1.738373 |
| H  | -4.858177 | -1.442317 | 1.392318  |
| H  | -6.396174 | -0.342115 | -0.232098 |

\*

-----  
**H**  
 CPCM (MeOH)  
 M06 SCF (DZ) = -1499.838038  
 G (1 atm) = -1499.488484  
 qh-G (1 mol/L) = -1499.481094  
 qh-G (24.56 mol/L) = -1499.478072

**H**  
 CPCM (MeOH)  
 wB97X-D3 SCF (DZ) = -1500.406824  
 G (1 atm) = -1500.045210  
 qh G-E (1 mol/L) = 0.371090  
 qh G-E (24.56 mol/L) = 0.374112

Lowest Frequency = 14.57  
 HF SCF energy (TZ) = -1493.083621  
 HF SCF energy (QZ) = -1493.145936  
 Correlation energy (DZ) = -4.184253  
 Correlation energy (TZ) = -5.123563  
 DLPNO-CCSD(T1)/CBS = -1498.837148

PBE0+D3BJ (ATZ) = -1499.697200  
 M06-2X (ATZ) = -1500.380812  
 wB97M-V (ATZ) = -1500.433171  
 B2GP-PLYP (ATZ) = -1499.670991  
 B2K-PLYP (ATZ) = -1499.502420  
 PWPB95 (ATZ) = -1500.072746  
 PWPB95+D3BJ (ATZ) = -1500.111499  
 PWPB95+D4 (ATZ) = -1500.123645

\*xyz 0 1

|    |           |           |           |
|----|-----------|-----------|-----------|
| Ru | -0.245939 | -0.574727 | -0.438572 |
| C  | -1.699409 | 0.873211  | -0.602769 |
| N  | 0.838211  | 1.214691  | -0.110921 |
| C  | -3.053952 | 0.713110  | -0.924211 |
| C  | -1.251194 | 2.205343  | -0.404375 |
| Cl | 0.118378  | -0.201439 | -2.846033 |
| C  | 0.154927  | 2.318722  | -0.143603 |
| C  | 2.223231  | 1.246677  | 0.189792  |
| C  | -3.913446 | 1.810703  | -1.002538 |
| H  | -3.459038 | -0.285063 | -1.126476 |
| C  | -2.108896 | 3.312425  | -0.490720 |
| H  | 0.649155  | 3.290732  | 0.002760  |
| C  | 3.118732  | 0.544564  | -0.623907 |
| C  | 2.693275  | 1.943762  | 1.306995  |
| C  | -3.450465 | 3.112821  | -0.781846 |
| H  | -4.968916 | 1.649292  | -1.243242 |
| H  | -1.712534 | 4.320783  | -0.332895 |
| C  | 4.477944  | 0.565597  | -0.331716 |
| H  | 2.729081  | 0.001267  | -1.490211 |
| C  | 4.056511  | 1.952503  | 1.595718  |
| H  | 1.981923  | 2.458498  | 1.959908  |
| H  | -4.136640 | 3.960380  | -0.847996 |
| C  | 4.951847  | 1.267841  | 0.777761  |
| H  | 5.176087  | 0.027421  | -0.977771 |
| H  | 4.417374  | 2.492687  | 2.474513  |
| H  | 6.019990  | 1.273861  | 1.007757  |
| C  | 0.411236  | -1.400383 | 1.441366  |
| C  | -1.010621 | -1.404476 | 1.425947  |
| C  | 1.185876  | -2.118394 | 0.475746  |
| H  | 0.939642  | -0.830784 | 2.211445  |
| C  | -1.851688 | -0.750652 | 2.494131  |
| C  | -1.636666 | -2.065846 | 0.322801  |
| C  | 0.562302  | -2.729794 | -0.615222 |
| H  | 2.277279  | -2.088286 | 0.530956  |
| C  | -1.171881 | 0.428669  | 3.170955  |
| C  | -2.262811 | -1.806734 | 3.517337  |
| H  | -2.764718 | -0.380444 | 1.989467  |
| C  | -0.872880 | -2.661006 | -0.700245 |
| H  | -2.726255 | -2.026518 | 0.227879  |
| C  | 1.342967  | -3.356937 | -1.720535 |
| H  | -0.824079 | 1.176112  | 2.438783  |
| H  | -0.306107 | 0.107013  | 3.775296  |
| H  | -1.874444 | 0.925439  | 3.858051  |
| H  | -2.796048 | -2.646950 | 3.043918  |
| H  | -1.372412 | -2.214988 | 4.027037  |
| H  | -2.922879 | -1.371482 | 4.284395  |
| H  | -1.374599 | -3.066974 | -1.582796 |
| H  | 1.227189  | -4.452847 | -1.699891 |

Lowest Frequency = 10.21

HF SCF energy (TZ) = -1493.086057  
 HF SCF energy (QZ) = -1493.146921  
 Correlation energy (DZ) = -4.184425  
 Correlation energy (TZ) = -5.123820  
 DLPNO-CCSD(T1)/CBS = -1498.838001

PBE0+D3BJ (ATZ) = -1499.697172  
 M06-2X (ATZ) = -1500.389210  
 wB97M-V (ATZ) = -1500.438217  
 B2GP-PLYP (ATZ) = -1499.680316  
 B2K-PLYP (ATZ) = -1499.514170  
 PWPB95 (ATZ) = -1500.078997  
 PWPB95+D3BJ (ATZ) = -1500.117784  
 PWPB95+D4 (ATZ) = -1500.129917

SMD (MeOH)

HF SCF energy (TZ) = -1493.094018  
 HF SCF energy (QZ) = -1493.154944  
 Correlation energy (DZ) = -4.183900  
 Correlation energy (TZ) = -5.123544  
 DLPNO-CCSD(T1)/CBS = -1498.845913

\* xyz 0 1

|    |           |           |           |
|----|-----------|-----------|-----------|
| Ru | -0.252039 | -0.556386 | -0.389695 |
| C  | -1.686714 | 0.915877  | -0.494541 |
| N  | 0.889452  | 1.205856  | -0.164997 |
| C  | -3.071831 | 0.794911  | -0.694600 |
| C  | -1.191864 | 2.239046  | -0.368225 |
| C  | 0.241806  | 2.323156  | -0.193850 |
| C  | 2.299261  | 1.208289  | 0.046453  |
| C  | -3.903227 | 1.916831  | -0.736852 |
| C  | -2.015970 | 3.372487  | -0.420189 |
| C  | 3.127216  | 0.530920  | -0.854408 |
| C  | 2.845900  | 1.841140  | 1.164823  |
| C  | -3.384202 | 3.210013  | -0.599315 |
| C  | 4.502527  | 0.508379  | -0.642940 |
| C  | 4.225922  | 1.809192  | 1.371428  |
| C  | 5.056728  | 1.146166  | 0.470040  |
| C  | 0.293928  | -1.290880 | 1.558677  |
| C  | -1.111645 | -1.411051 | 1.416441  |
| C  | 1.202226  | -1.939995 | 0.658461  |
| C  | -2.096893 | -0.836292 | 2.414106  |
| C  | -1.593913 | -2.141861 | 0.280967  |
| C  | 0.730556  | -2.629189 | -0.460116 |
| C  | -1.594234 | 0.417025  | 3.127412  |
| C  | -2.483073 | -1.934399 | 3.413128  |
| C  | -0.696281 | -2.681057 | -0.655850 |
| C  | 1.657259  | -3.231552 | -1.475329 |
| H  | -3.523433 | -0.193184 | -0.821897 |
| H  | 0.768432  | 3.281934  | -0.103999 |
| H  | -4.978761 | 1.781932  | -0.882304 |
| H  | -1.579308 | 4.370226  | -0.320643 |
| H  | 2.678206  | 0.032792  | -1.716252 |
| H  | 2.187145  | 2.337769  | 1.880895  |
| H  | -4.045282 | 4.078150  | -0.637222 |
| H  | 5.147095  | -0.015819 | -1.351917 |
| H  | 4.649907  | 2.298597  | 2.250896  |
| H  | 6.135616  | 1.119290  | 0.636602  |
| H  | 0.707229  | -0.684612 | 2.365565  |
| H  | 2.276494  | -1.806596 | 0.798407  |
| H  | -2.997367 | -0.562945 | 1.839072  |
| H  | -2.667480 | -2.212499 | 0.098861  |
| H  | -1.283236 | 1.189685  | 2.408009  |

|   |          |           |           |
|---|----------|-----------|-----------|
| H | 0.978644 | -2.999303 | -2.696577 |
| H | 2.414083 | -3.120579 | -1.639294 |

\*

-----

|    |           |           |           |
|----|-----------|-----------|-----------|
| H  | -0.742843 | 0.195543  | 3.790469  |
| H  | -2.396357 | 0.835179  | 3.753257  |
| H  | -2.888370 | -2.820813 | 2.901568  |
| H  | -1.606039 | -2.251619 | 4.000608  |
| H  | -3.247737 | -1.566515 | 4.113829  |
| H  | -1.090837 | -3.137828 | -1.565128 |
| H  | 1.617994  | -4.330019 | -1.417135 |
| H  | 1.359699  | -2.934506 | -2.491128 |
| H  | 2.693220  | -2.910156 | -1.303443 |
| Cl | 0.012485  | -0.241094 | -2.821647 |

\*

-----

### H•S

CPCM (MeOH)

wB97X-D3 SCF (DZ) = -1616.119558

G (1 atm) = -1615.709671

qh G-E (1 mol/L) = 0.422368

qh G-E (24.56 mol/L) = 0.425391

Lowest Frequency = 9.72

HF SCF energy (TZ) = -1608.179726

HF SCF energy (QZ) = -1608.248536

Correlation energy (DZ) = -4.566970

Correlation energy (TZ) = -5.597770

DLPNO-CCSD(T1)/CBS = -1614.469373

SMD (MeOH)

HF SCF energy (TZ) = -1608.189001

HF SCF energy (QZ) = -1608.257849

Correlation energy (DZ) = -4.565742

Correlation energy (TZ) = -5.596791

DLPNO-CCSD(T1)/CBS = -1614.477863

\* xyz 0 1

|    |           |           |           |
|----|-----------|-----------|-----------|
| Ru | 0.459924  | 0.282482  | -0.407185 |
| C  | 1.704695  | 1.207045  | 0.945081  |
| C  | 2.985508  | 1.746321  | 0.740770  |
| C  | 1.199601  | 1.283745  | 2.266614  |
| C  | 3.697862  | 2.341353  | 1.784267  |
| C  | 1.911232  | 1.870221  | 3.323870  |
| C  | -0.109357 | 0.693744  | 2.437709  |
| C  | 3.167663  | 2.409612  | 3.078857  |
| N  | -0.673496 | 0.197184  | 1.385074  |
| C  | -1.985719 | -0.351793 | 1.485155  |
| C  | -2.268834 | -1.567766 | 0.855080  |
| C  | -2.995976 | 0.332544  | 2.168539  |
| C  | -3.550373 | -2.105317 | 0.935541  |
| C  | -4.278322 | -0.212032 | 2.240098  |
| C  | -4.559401 | -1.432398 | 1.627912  |
| C  | 0.479657  | 2.021427  | -1.665918 |
| C  | -0.872431 | 1.693469  | -1.393451 |
| C  | 1.368612  | 1.063926  | -2.243776 |
| C  | -1.858176 | 2.677294  | -0.790666 |
| C  | -1.327595 | 0.379704  | -1.753298 |
| C  | 0.918522  | -0.243974 | -2.520678 |
| C  | -1.215774 | 3.711695  | 0.131776  |
| C  | -2.647392 | 3.347249  | -1.922293 |
| C  | -0.463299 | -0.568733 | -2.302803 |
| C  | 1.855013  | -1.287865 | -3.058198 |
| H  | 3.446656  | 1.706087  | -0.250311 |
| H  | 4.688685  | 2.760649  | 1.587306  |
| H  | 1.476288  | 1.898812  | 4.326779  |
| H  | -0.606171 | 0.651764  | 3.415250  |
| H  | 3.736592  | 2.877761  | 3.884580  |
| H  | -1.487883 | -2.082990 | 0.292852  |

|    |           |           |           |
|----|-----------|-----------|-----------|
| H  | -2.785367 | 1.304583  | 2.620350  |
| H  | -3.762066 | -3.058286 | 0.445567  |
| H  | -5.064196 | 0.331044  | 2.769419  |
| H  | -5.565273 | -1.854155 | 1.679645  |
| H  | 0.869409  | 2.998428  | -1.379559 |
| H  | 2.416234  | 1.320494  | -2.404875 |
| H  | -2.564407 | 2.078313  | -0.190719 |
| H  | -2.353346 | 0.092628  | -1.510257 |
| H  | -0.622522 | 3.232292  | 0.925037  |
| H  | -0.557335 | 4.398698  | -0.423458 |
| H  | -1.997066 | 4.320976  | 0.609783  |
| H  | -3.150995 | 2.602256  | -2.557148 |
| H  | -1.977858 | 3.944312  | -2.562840 |
| H  | -3.415796 | 4.019531  | -1.511565 |
| H  | -0.806034 | -1.591568 | -2.466087 |
| H  | 1.562908  | -2.289052 | -2.714931 |
| H  | 1.811830  | -1.278777 | -4.158616 |
| H  | 2.890538  | -1.089929 | -2.751453 |
| Cl | 1.524231  | -1.815618 | 0.379445  |
| O  | -0.425367 | -3.572996 | -1.351839 |
| C  | -0.666986 | -4.819385 | -0.728257 |
| H  | 0.222225  | -3.086318 | -0.805638 |
| H  | 0.239444  | -5.449311 | -0.688215 |
| H  | -1.054788 | -4.699756 | 0.299661  |
| H  | -1.427319 | -5.349969 | -1.319324 |

\*

-----  
**H•S<sub>2</sub>**

CPCM (MeOH)

|                        |              |
|------------------------|--------------|
| wB97X-D3 SCF (DZ) =    | -1731.831192 |
| G (1 atm) =            | -1731.372638 |
| qh G-E (1 mol/L) =     | 0.473261     |
| qh G-E (24.56 mol/L) = | 0.476284     |
| Lowest Frequency =     | 8.04         |

SMD (MeOH)

|                           |              |
|---------------------------|--------------|
| HF SCF energy (TZ) =      | -1723.282476 |
| HF SCF energy (QZ) =      | -1723.359407 |
| Correlation energy (DZ) = | -4.947539    |
| Correlation energy (TZ) = | -6.070233    |
| DLPNO-CCSD(T1)/CBS =      | -1730.108851 |

\* xyz 0 1

|    |           |           |           |
|----|-----------|-----------|-----------|
| Ru | -0.655113 | -0.385594 | 0.252352  |
| C  | -0.929285 | 0.050105  | 2.337114  |
| C  | -1.534850 | 1.416407  | -0.229861 |
| C  | 0.462464  | -0.094554 | 2.099345  |
| C  | -1.852613 | -0.980924 | 1.995485  |
| H  | -1.316269 | 0.990446  | 2.731023  |
| O  | -4.466971 | -0.894883 | -0.000452 |
| Cl | -1.769129 | -1.229275 | -1.805021 |
| C  | -0.785224 | 2.228730  | -1.114632 |
| C  | -2.774509 | 1.929504  | 0.183331  |
| C  | 1.487436  | 0.966044  | 2.454206  |
| C  | 0.902872  | -1.325503 | 1.511278  |
| C  | -1.390807 | -2.174012 | 1.389925  |
| H  | -2.923377 | -0.826175 | 2.128970  |
| C  | -5.472789 | -0.314823 | -0.807338 |
| H  | -3.645938 | -0.913543 | -0.523559 |
| H  | -0.736481 | -3.169432 | -1.686284 |
| C  | -1.226797 | 3.484796  | -1.557229 |
| C  | 0.475598  | 1.653054  | -1.527418 |
| C  | -3.220148 | 3.181593  | -0.245777 |
| H  | -3.417237 | 1.336687  | 0.839025  |
| C  | 0.944854  | 2.392814  | 2.407725  |

```

C 2.088519 0.639763 3.827160
H 2.289748 0.881024 1.701090
C 0.010718 -2.353737 1.175452
H 1.959990 -1.434962 1.256944
C -2.356658 -3.252213 0.986559
H -5.240604 0.733584 -1.068579
H -5.636332 -0.878955 -1.742825
H -6.410555 -0.324429 -0.233017
O -0.233935 -3.999842 -1.585276
C -2.451361 3.967823 -1.113186
H -0.608299 4.073020 -2.240922
N 0.780982 0.494053 -1.041179
H 1.146859 2.164664 -2.228840
H -4.187169 3.554957 0.103310
H 0.491036 2.620275 1.431474
H 0.186121 2.565840 3.187695
H 1.762286 3.107939 2.582855
H 2.519876 -0.372655 3.847246
H 1.315929 0.697040 4.611276
H 2.885231 1.355723 4.079309
H 0.367677 -3.246329 0.660136
H -1.963829 -3.833693 0.142785
H -2.494730 -3.935688 1.839208
H -3.332879 -2.829409 0.717728
C -0.086934 -4.571716 -2.871902
H -2.813948 4.944248 -1.440847
C 2.041507 -0.090268 -1.362011
H -1.059888 -4.750427 -3.361982
H 0.529052 -3.939413 -3.536626
H 0.420964 -5.539349 -2.752777
C 2.102792 -1.443888 -1.707415
C 3.215246 0.666936 -1.292486
C 3.330910 -2.024378 -2.011309
H 1.191590 -2.044397 -1.720668
C 4.441866 0.075308 -1.594812
H 3.170780 1.712275 -0.978468
C 4.504171 -1.268523 -1.959974
H 3.369508 -3.081336 -2.284263
H 5.355134 0.670972 -1.533018
H 5.466074 -1.730853 -2.191104

```

\*

-----

**cis-INT(D<sup>+</sup>-E<sup>+</sup>)**

CPCM (MeOH)  
M06 SCF (DZ) = -1268.424835  
G (1 atm) = -1268.018408  
qh-G (1 mol/L) = -1268.009876  
qh-G (24.56 mol/L) = -1268.006854  
Lowest Frequency = 11.97

HF SCF energy (TZ) = -1261.299913  
HF SCF energy (QZ) = -1261.374581  
Correlation energy (DZ) = -4.696362  
Correlation energy (TZ) = -5.733180  
DLPNO-CCSD(T1)/CBS = -1267.736109

\*xyz 1 1

```

Ru -0.203077 0.754768 -0.316793
C -1.284614 -1.245879 -1.394396
N 0.772661 -0.994386 0.485683
C -2.467957 -1.246857 -2.130728
C -1.093629 -2.188881 -0.364979
H -0.379582 -0.735102 -1.817181
O 1.561326 0.940218 -1.373311
C 2.109218 -1.003129 0.974310

```

**cis-INT(D<sup>+</sup>-E<sup>+</sup>)**

CPCM (MeOH)  
wB97X-D3 SCF (DZ) = -1269.058726  
G (1 atm) = -1268.637891  
qh G-E (1 mol/L) = 0.431817  
qh G-E (24.56 mol/L) = 0.434840  
Lowest Frequency = 10.94

HF SCF energy (TZ) = -1261.308366  
HF SCF energy (QZ) = -1261.381991  
Correlation energy (DZ) = -4.690654  
Correlation energy (TZ) = -5.726608  
DLPNO-CCSD(T1)/CBS = -1267.736129

SMD (MeOH)

HF SCF energy (TZ) = -1261.328371  
HF SCF energy (QZ) = -1261.401845  
Correlation energy (DZ) = -4.686534  
Correlation energy (TZ) = -5.723053  
DLPNO-CCSD(T1)/CBS = -1267.752712

\* xyz 1 1

```

Ru 0.003016 0.699255 -0.124212

```

|       |           |           |           |   |           |           |           |
|-------|-----------|-----------|-----------|---|-----------|-----------|-----------|
| C     | 0.144641  | -2.121434 | 0.383991  | O | -0.544102 | 2.097164  | 2.570281  |
| C     | -3.462847 | -2.175292 | -1.831250 | O | -1.724301 | 1.107233  | 0.951183  |
| H     | -2.600396 | -0.535562 | -2.949925 | C | -1.622375 | 1.785177  | 2.054692  |
| C     | -2.084232 | -3.136772 | -0.090201 | C | -2.947635 | 2.181346  | 2.661456  |
| O     | 1.543121  | -1.028870 | -2.454225 | C | -0.562878 | 1.370797  | -2.065952 |
| C     | 2.103425  | 0.008651  | -2.107773 | C | 0.482924  | 0.414604  | -2.220381 |
| C     | 2.536101  | -0.032024 | 1.882223  | C | -0.374884 | 2.537687  | -1.266534 |
| C     | 3.008734  | -1.968511 | 0.508490  | C | 1.715755  | 0.542364  | -1.540754 |
| H     | 0.558386  | -3.029920 | 0.845842  | C | -1.484819 | 3.524375  | -1.079485 |
| C     | -3.270374 | -3.117230 | -0.816665 | C | 0.849386  | 2.673437  | -0.571404 |
| H     | -4.390711 | -2.180717 | -2.407242 | C | 2.843277  | -0.466355 | -1.653077 |
| H     | -1.928945 | -3.869591 | 0.706028  | C | 1.849147  | 1.673848  | -0.688662 |
| C     | 3.529897  | 0.312633  | -2.480175 | C | 2.385807  | -1.850047 | -2.109910 |
| C     | 3.848089  | -0.043306 | 2.340956  | C | 3.918492  | 0.098629  | -2.590665 |
| H     | 1.832623  | 0.718222  | 2.246488  | H | -3.620531 | 1.313914  | 2.701412  |
| C     | 4.321496  | -1.970957 | 0.970882  | H | -3.419050 | 2.938138  | 2.016733  |
| H     | 2.685943  | -2.687538 | -0.248982 | H | -2.803247 | 2.598090  | 3.664683  |
| H     | -4.053087 | -3.846168 | -0.597230 | H | -1.529451 | 1.189904  | -2.538321 |
| H     | 3.621875  | 1.337082  | -2.867876 | H | 0.284004  | -0.480584 | -2.809710 |
| H     | 4.146586  | 0.254094  | -1.567613 | H | -2.464415 | 3.036259  | -1.155299 |
| H     | 3.903054  | -0.409248 | -3.217052 | H | -1.411576 | 4.281606  | -1.875273 |
| C     | 4.744401  | -1.010979 | 1.886996  | H | -1.402548 | 4.032441  | -0.110218 |
| H     | 4.172387  | 0.711638  | 3.060506  | H | 0.989335  | 3.491744  | 0.134489  |
| H     | 5.021379  | -2.722187 | 0.598005  | H | 3.281755  | -0.558984 | -0.644528 |
| H     | 5.777027  | -1.010120 | 2.243063  | H | 2.733370  | 1.748962  | -0.052157 |
| C     | 0.085051  | 2.459828  | 0.950226  | H | 1.559741  | -2.237532 | -1.495186 |
| C     | -0.776741 | 1.546714  | 1.623909  | H | 2.055280  | -1.840598 | -3.160761 |
| C     | -0.242315 | 2.973251  | -0.340345 | H | 3.223515  | -2.558066 | -2.033851 |
| H     | 1.035184  | 2.748524  | 1.406903  | H | 4.292796  | 1.071351  | -2.237462 |
| C     | -1.972340 | 1.081223  | 1.026242  | H | 3.513941  | 0.233943  | -3.606584 |
| H     | -0.460780 | 1.139779  | 2.588403  | H | 4.771010  | -0.594033 | -2.650025 |
| C     | 0.693335  | 3.883217  | -1.053308 | C | 1.391005  | -0.336173 | 1.804451  |
| C     | -1.408378 | 2.479310  | -0.963545 | C | 2.611627  | 0.119669  | 2.298238  |
| C     | -2.924945 | 0.120588  | 1.695067  | C | 1.226158  | -1.688213 | 1.462127  |
| C     | -2.234262 | 1.537418  | -0.292110 | N | -0.721993 | -1.290802 | 0.156624  |
| H     | 0.606218  | 3.770474  | -2.142521 | C | 3.672659  | -0.773800 | 2.446099  |
| H     | 0.445983  | 4.925693  | -0.795295 | C | 2.283185  | -2.585315 | 1.640936  |
| H     | 1.733527  | 3.696412  | -0.754210 | C | -0.038627 | -2.118391 | 0.863854  |
| H     | -1.631826 | 2.754938  | -1.996399 | C | -2.023372 | -1.694637 | -0.292641 |
| C     | -2.304215 | -0.675720 | 2.830872  | C | 3.506239  | -2.122249 | 2.122226  |
| C     | -4.138433 | 0.908383  | 2.187361  | C | -2.275555 | -1.851296 | -1.655370 |
| H     | -3.267550 | -0.583679 | 0.912543  | C | -3.031782 | -1.907335 | 0.647986  |
| H     | -3.080206 | 1.103868  | -0.833978 | C | -3.547873 | -2.231749 | -2.076134 |
| H     | -1.383937 | -1.202248 | 2.528609  | C | -4.302717 | -2.284391 | 0.216854  |
| H     | -2.061057 | -0.028094 | 3.690425  | C | -4.563774 | -2.445731 | -1.143442 |
| H     | -3.019788 | -1.431195 | 3.189471  | H | 0.528250  | 0.366782  | 1.893367  |
| H     | -4.637686 | 1.448141  | 1.367438  | H | 2.725090  | 1.169287  | 2.575846  |
| H     | -3.835183 | 1.647965  | 2.948000  | H | 4.631137  | -0.418945 | 2.829711  |
| H     | -4.872905 | 0.229188  | 2.646898  | H | 2.152547  | -3.637504 | 1.379821  |
| *     |           |           |           | H | -0.395544 | -3.145581 | 1.012553  |
| ----- |           |           |           | H | 4.336606  | -2.819492 | 2.247638  |
|       |           |           |           | H | -1.477382 | -1.700578 | -2.382488 |
|       |           |           |           | H | -2.818492 | -1.761279 | 1.708512  |
|       |           |           |           | H | -3.742912 | -2.365229 | -3.141959 |
|       |           |           |           | H | -5.092566 | -2.449151 | 0.952477  |
|       |           |           |           | H | -5.560246 | -2.740347 | -1.478535 |
|       |           |           |           | * |           |           |           |
| ----- |           |           |           |   |           |           |           |

**cis-INT(D<sup>+</sup>-E<sup>+</sup>)\*S<sup>p</sup>**

CPCM (MeOH)

wB97X-D3 SCF (DZ) = -1384.774457

G (1 atm) = -1384.304988

qh G-E (1 mol/L) = 0.483226

qh G-E (24.56 mol/L) = 0.486248

Lowest Frequency = 10.90



SMD (MeOH)  
 HF SCF energy (TZ) = -1376.423691  
 HF SCF energy (QZ) = -1376.505218  
 Correlation energy (DZ) = -5.067166  
 Correlation energy (TZ) = -6.195660  
 DLPNO-CCSD(T1)/CBS = -1383.384863

\* xyz 1 1  
 Ru -0.509134 -0.066613 -0.231657  
 C -1.467172 0.542759 -2.091295  
 C 0.356799 -1.037958 -1.938839  
 C -2.332386 -0.380728 -1.420942  
 C -0.125213 0.233484 -2.388069  
 H -1.840392 1.544337 -2.313117  
 C -0.483632 -1.943425 -1.256190  
 C -1.014165 2.278557 0.574528  
 N 1.367900 0.740679 0.377558  
 H -1.198582 1.301648 1.092152  
 O -0.474749 -0.988285 1.650270  
 H 1.418661 -1.274307 -2.037113  
 C -1.866625 -1.640427 -1.007947  
 H -3.338290 -0.054164 -1.157846  
 C 0.781989 1.219536 -3.063038  
 H -0.052910 -2.859358 -0.847377  
 C -2.154360 3.045432 0.355518  
 C 0.263707 2.851205 0.464190  
 C 2.565615 -0.048466 0.407185  
 C 1.451064 2.007599 0.585704  
 O -2.249197 0.139815 2.391874  
 C -1.344190 -0.701035 2.555527  
 C -2.715465 -2.650028 -0.263690  
 H 1.813987 1.116659 -2.701651  
 H 0.780385 1.030742 -4.146956  
 H 0.439948 2.248657 -2.890045  
 C -2.022172 4.393104 0.015899  
 H -3.140833 2.592563 0.471292  
 C 0.388042 4.207426 0.151369  
 C 2.567977 -1.266457 1.091597  
 C 3.701437 0.381306 -0.284383  
 H 2.417051 2.469230 0.825155  
 H -2.494062 1.109682 3.879079  
 C -1.224756 -1.454370 3.855179  
 C -3.986435 -2.066946 0.348298  
 C -3.035572 -3.805354 -1.223537  
 H -2.082261 -3.042959 0.549616  
 C -0.755635 4.971508 -0.078445  
 H -2.912840 4.999562 -0.159114  
 H 1.379890 4.656518 0.067050  
 C 3.725186 -2.040877 1.100684  
 H 1.665689 -1.586948 1.613885  
 C 4.852073 -0.406106 -0.272106  
 H 3.679070 1.315766 -0.849585  
 O -2.316971 1.662293 4.665807  
 H -0.234251 -1.908244 3.973014  
 H -1.986726 -2.248703 3.862715  
 H -1.443077 -0.767847 4.683946  
 H -3.764989 -1.223296 1.017793  
 H -4.690371 -1.728152 -0.428685  
 H -4.496138 -2.843816 0.936511  
 H -2.122261 -4.264424 -1.630802  
 H -3.647375 -3.449384 -2.067768  
 H -3.601594 -4.585390 -0.693851  
 H -0.656920 6.028373 -0.332963  
 C 4.868301 -1.615207 0.421352  
 H 3.731561 -2.988311 1.643487

|   |           |           |           |
|---|-----------|-----------|-----------|
| H | 5.736554  | -0.072149 | -0.818235 |
| C | -1.197480 | 2.457176  | 4.338458  |
| H | 5.769784  | -2.231308 | 0.426104  |
| H | -1.412260 | 3.182354  | 3.530061  |
| H | -0.325000 | 1.852451  | 4.023776  |
| H | -0.906137 | 3.026332  | 5.234137  |

\*

-----

**cis-INT(D<sup>+</sup>-E<sup>+</sup>)•S<sub>2</sub><sup>hp</sup>**

CPCM (MeOH)

|                        |              |
|------------------------|--------------|
| wB97X-D3 SCF (DZ) =    | -1500.489292 |
| G (1 atm) =            | -1499.970759 |
| qh G-E (1 mol/L) =     | 0.534422     |
| qh G-E (24.56 mol/L) = | 0.537444     |
| Lowest Frequency =     | 11.13        |

SMD (MeOH)

|                           |              |
|---------------------------|--------------|
| HF SCF energy (TZ) =      | -1491.517803 |
| HF SCF energy (QZ) =      | -1491.607393 |
| Correlation energy (DZ) = | -5.450420    |
| Correlation energy (TZ) = | -6.670413    |
| DLPNO-CCSD(T1)/CBS =      | -1499.017685 |

\* xyz 1 1

|    |           |           |           |
|----|-----------|-----------|-----------|
| Ru | -0.500079 | -0.105204 | -0.242529 |
| C  | -1.380834 | 0.496111  | -2.143667 |
| C  | 0.404102  | -1.123322 | -1.906444 |
| C  | -2.286061 | -0.398220 | -1.486415 |
| C  | -0.036245 | 0.153984  | -2.386682 |
| H  | -1.724618 | 1.501164  | -2.395046 |
| C  | -0.479079 | -2.002408 | -1.247161 |
| C  | -1.082789 | 2.213466  | 0.531431  |
| N  | 1.347653  | 0.753533  | 0.397271  |
| H  | -1.247747 | 1.234063  | 1.055116  |
| O  | -0.490534 | -1.053534 | 1.644547  |
| H  | 1.463396  | -1.383032 | -1.964827 |
| C  | -1.860148 | -1.660582 | -1.040168 |
| H  | -3.291306 | -0.044876 | -1.256770 |
| C  | 0.912002  | 1.110995  | -3.045988 |
| H  | -0.086378 | -2.911890 | -0.784772 |
| C  | -2.242451 | 2.944621  | 0.293680  |
| C  | 0.177623  | 2.829171  | 0.456322  |
| C  | 2.573469  | 0.008777  | 0.442209  |
| C  | 1.387644  | 2.023867  | 0.600509  |
| O  | -2.189231 | 0.139770  | 2.455330  |
| C  | -1.313915 | -0.729766 | 2.590107  |
| H  | 0.007358  | -2.837569 | 1.553953  |
| C  | -2.746355 | -2.632519 | -0.289793 |
| H  | 1.936896  | 0.966871  | -2.679580 |
| H  | 0.910482  | 0.928951  | -4.131111 |
| H  | 0.606597  | 2.150960  | -2.869175 |
| C  | -2.146812 | 4.299056  | -0.031304 |
| H  | -3.216024 | 2.459218  | 0.384143  |
| C  | 0.264530  | 4.191303  | 0.157680  |
| C  | 2.620045  | -1.198733 | 1.141175  |
| C  | 3.695510  | 0.470224  | -0.252029 |
| H  | 2.335148  | 2.516438  | 0.851897  |
| H  | -2.305045 | 1.168825  | 3.942553  |
| C  | -1.162286 | -1.479919 | 3.887506  |
| O  | 0.354475  | -3.705052 | 1.274874  |
| C  | -4.001363 | -2.000426 | 0.304961  |
| C  | -3.089034 | -3.798294 | -1.227544 |
| H  | -2.130096 | -3.029903 | 0.532674  |
| C  | -0.898314 | 4.919585  | -0.091729 |
| H  | -3.052811 | 4.877789  | -0.220839 |

|   |           |           |           |
|---|-----------|-----------|-----------|
| H | 1.242758  | 4.673237  | 0.100357  |
| C | 3.800499  | -1.936309 | 1.155707  |
| H | 1.735527  | -1.550757 | 1.669025  |
| C | 4.872244  | -0.277407 | -0.231106 |
| H | 3.642946  | 1.398363  | -0.825629 |
| O | -2.031402 | 1.722232  | 4.698592  |
| H | -0.185941 | -1.972869 | 3.962357  |
| H | -1.955979 | -2.240568 | 3.941966  |
| H | -1.307609 | -0.776293 | 4.717792  |
| C | -0.249419 | -4.711736 | 2.065803  |
| H | -3.756913 | -1.150946 | 0.959645  |
| H | -4.692586 | -1.654702 | -0.480283 |
| H | -4.535788 | -2.749677 | 0.906830  |
| H | -2.182958 | -4.288097 | -1.615131 |
| H | -3.684008 | -3.446264 | -2.085323 |
| H | -3.678350 | -4.552851 | -0.686326 |
| H | -0.828823 | 5.981506  | -0.334551 |
| C | 4.928758  | -1.479841 | 0.472043  |
| H | 3.832748  | -2.879860 | 1.704282  |
| H | 5.745368  | 0.081874  | -0.779430 |
| C | -0.933189 | 2.486051  | 4.246550  |
| H | -1.349518 | -4.722240 | 1.959250  |
| H | -0.004881 | -4.601779 | 3.136949  |
| H | 0.135811  | -5.682540 | 1.723259  |
| H | 5.849833  | -2.066170 | 0.480796  |
| H | -0.528453 | 3.045323  | 5.103365  |
| H | -0.118901 | 1.857333  | 3.837216  |
| H | -1.217275 | 3.218043  | 3.466211  |

\*

**trans-INT(D<sup>+</sup>-E)**

CPCM (MeOH)  
M06 SCF (DZ) = -1268.426133  
G (1 atm) = -1268.017778  
qh-G (1 mol/L) = -1268.009714  
qh-G (24.56 mol/L) = -1268.006692  
Lowest Frequency = 23.10

HF SCF energy (TZ) = -1261.305576  
HF SCF energy (QZ) = -1261.380229  
Correlation energy (DZ) = -4.693504  
Correlation energy (TZ) = -5.729980  
DLPNO-CCSD(T1)/CBS = -1267.738352

\*xyz 1 1

|    |           |           |           |
|----|-----------|-----------|-----------|
| Ru | -0.137637 | 0.562708  | 0.260742  |
| C  | -1.652222 | -0.385645 | -1.577943 |
| N  | 0.601844  | -1.365701 | -0.211529 |
| C  | -1.427157 | -1.759828 | -1.378885 |
| C  | -2.916053 | 0.089222  | -1.913353 |
| H  | -0.778655 | 0.290905  | -1.694985 |
| O  | -1.442688 | -0.590347 | 1.393924  |
| C  | 1.891576  | -1.799523 | 0.219537  |
| C  | -0.141922 | -2.190771 | -0.874218 |
| C  | -2.474488 | -2.665294 | -1.573134 |
| C  | -3.960542 | -0.817519 | -2.072685 |
| H  | -3.072439 | 1.159158  | -2.067521 |
| C  | -2.681351 | -0.216171 | 1.568515  |
| C  | 2.162862  | -1.868976 | 1.586927  |
| C  | 2.873873  | -2.107252 | -0.721226 |
| H  | 0.188288  | -3.229103 | -1.024204 |
| C  | -3.736046 | -2.187550 | -1.912492 |
| H  | -2.303011 | -3.734279 | -1.425503 |
| H  | -4.956140 | -0.458551 | -2.341657 |
| C  | -3.492054 | -1.233042 | 2.332594  |

**trans-INT(D<sup>+</sup>-E)**

CPCM (MeOH)  
wB97X-D3 SCF (DZ) = -1269.060063  
G (1 atm) = -1268.639973  
qh G-E (1 mol/L) = 0.431359  
qh G-E (24.56 mol/L) = 0.434381  
Lowest Frequency = 10.89

HF SCF energy (TZ) = -1261.309644  
HF SCF energy (QZ) = -1261.383111  
Correlation energy (DZ) = -4.691716  
Correlation energy (TZ) = -5.728006  
DLPNO-CCSD(T1)/CBS = -1267.738795

SMD (MeOH)

HF SCF energy (TZ) = -1261.330695  
HF SCF energy (QZ) = -1261.404013  
Correlation energy (DZ) = -4.687388  
Correlation energy (TZ) = -5.724390  
DLPNO-CCSD(T1)/CBS = -1267.756452

\*xyz 1 1

|    |           |           |           |
|----|-----------|-----------|-----------|
| Ru | -0.146847 | 0.587120  | 0.268477  |
| C  | -1.723194 | -0.400463 | -1.590001 |
| N  | 0.585027  | -1.334289 | -0.209590 |
| C  | -1.465856 | -1.758522 | -1.351792 |
| C  | -2.993191 | 0.032482  | -1.959233 |
| O  | -1.422224 | -0.556597 | 1.414583  |
| C  | 1.886511  | -1.771498 | 0.205498  |
| C  | -0.158027 | -2.166879 | -0.852984 |
| C  | -2.489705 | -2.696326 | -1.525565 |
| C  | -4.013628 | -0.904860 | -2.107962 |
| C  | -2.673586 | -0.225314 | 1.578490  |
| C  | 2.160924  | -1.888712 | 1.569015  |
| C  | 2.867541  | -2.034256 | -0.749452 |

|       |           |           |           |   |           |           |           |
|-------|-----------|-----------|-----------|---|-----------|-----------|-----------|
| O     | -3.166075 | 0.834575  | 1.159606  | C | -3.759747 | -2.263335 | -1.896685 |
| C     | 3.431312  | -2.249601 | 2.011203  | C | -3.463336 | -1.248519 | 2.364994  |
| H     | 1.369329  | -1.636570 | 2.302880  | O | -3.190992 | 0.798211  | 1.135356  |
| C     | 4.144733  | -2.477221 | -0.284423 | C | 3.433529  | -2.280376 | 1.975895  |
| H     | 2.643381  | -2.034184 | -1.787933 | C | 4.141424  | -2.419691 | -0.330219 |
| H     | -4.560293 | -2.890479 | -2.050570 | C | 4.426213  | -2.542386 | 1.028796  |
| H     | -3.011439 | -1.455558 | 3.296933  | C | 1.033855  | 1.506770  | 1.788496  |
| H     | -3.526797 | -2.176374 | 1.765840  | C | 1.823754  | 1.405542  | 0.611586  |
| H     | -4.512549 | -0.866906 | 2.500169  | C | -0.209904 | 2.211796  | 1.778837  |
| C     | 4.425421  | -2.546648 | 1.077775  | C | 1.386518  | 1.926604  | -0.631271 |
| H     | 3.645324  | -2.315057 | 3.080327  | C | -1.031289 | 2.315229  | 3.026059  |
| H     | 4.919882  | -2.709176 | -1.018262 | C | -0.670204 | 2.708483  | 0.542858  |
| H     | 5.423356  | -2.834389 | 1.416123  | C | 2.248736  | 1.794623  | -1.872073 |
| C     | 1.051469  | 1.486789  | 1.784368  | C | 0.103150  | 2.534408  | -0.640157 |
| C     | 1.833885  | 1.396988  | 0.599001  | C | 1.482499  | 1.320658  | -3.106873 |
| C     | -0.195319 | 2.183984  | 1.789510  | C | 2.955439  | 3.133824  | -2.116806 |
| H     | 1.399923  | 1.001132  | 2.699439  | H | -0.877188 | 0.313754  | -1.663742 |
| C     | 1.387789  | 1.931592  | -0.634062 | H | -3.175407 | 1.091903  | -2.143599 |
| H     | 2.761225  | 0.814637  | 0.620209  | H | 0.181187  | -3.198797 | -1.008190 |
| C     | -1.004801 | 2.265455  | 3.035600  | H | -2.293947 | -3.755328 | -1.345140 |
| C     | -0.669921 | 2.682827  | 0.557776  | H | -5.012561 | -0.578185 | -2.403044 |
| C     | 2.230459  | 1.821449  | -1.882205 | H | 1.377137  | -1.677445 | 2.299504  |
| C     | 0.096989  | 2.527025  | -0.630041 | H | 2.635787  | -1.919500 | -1.810443 |
| H     | -2.070869 | 2.388750  | 2.809105  | H | -4.562891 | -2.991773 | -2.023370 |
| H     | -0.662413 | 3.130744  | 3.626167  | H | -2.968399 | -1.450848 | 3.325208  |
| H     | -0.866905 | 1.365984  | 3.653555  | H | -3.491508 | -2.192853 | 1.801301  |
| H     | -1.678081 | 3.094683  | 0.496774  | H | -4.485794 | -0.892833 | 2.536787  |
| C     | 1.485318  | 1.253313  | -3.081340 | H | 3.650585  | -2.379978 | 3.041175  |
| C     | 2.813792  | 3.198160  | -2.193938 | H | 4.914342  | -2.620394 | -1.074735 |
| H     | 3.063936  | 1.136709  | -1.639591 | H | 5.424664  | -2.842145 | 1.353184  |
| H     | -0.355582 | 2.837648  | -1.577697 | H | 1.375386  | 1.024589  | 2.705226  |
| H     | 1.136902  | 0.222963  | -2.899139 | H | 2.747058  | 0.823536  | 0.646470  |
| H     | 0.616153  | 1.872642  | -3.361697 | H | -2.097482 | 2.398005  | 2.788248  |
| H     | 2.152748  | 1.224974  | -3.956030 | H | -0.715930 | 3.214785  | 3.576733  |
| H     | 3.365956  | 3.609104  | -1.334468 | H | -0.867437 | 1.444635  | 3.674464  |
| H     | 2.012377  | 3.910201  | -2.456493 | H | -1.667779 | 3.139198  | 0.469548  |
| H     | 3.504003  | 3.136758  | -3.049145 | H | 3.015382  | 1.038435  | -1.636966 |
| *     |           |           |           | H | -0.338770 | 2.843499  | -1.590016 |
| ----- |           |           |           | H | 1.040912  | 0.324913  | -2.947904 |
|       |           |           |           | H | 0.678676  | 2.018777  | -3.389178 |
|       |           |           |           | H | 2.168141  | 1.247819  | -3.963316 |
|       |           |           |           | H | 3.531703  | 3.447797  | -1.233587 |
|       |           |           |           | H | 2.223886  | 3.925155  | -2.347194 |
|       |           |           |           | H | 3.647514  | 3.048913  | -2.967467 |
|       |           |           |           | * |           |           |           |
| ----- |           |           |           |   |           |           |           |

**INT(E<sup>+</sup>-H)<sup>+</sup>**

CPCM (MeOH)

M06 SCF (DZ) = -1039.423559

G (1 atm) = -1039.073257

qh-G (1 mol/L) = -1039.065834

qh-G (24.56 mol/L) = -1039.062812

Lowest Frequency = 22.89

HF SCF energy (TZ) = -1033.381071

HF SCF energy (QZ) = -1033.439695

Correlation energy (DZ) = -3.995807

Correlation energy (TZ) = -4.865051

DLPNO-CCSD(T1)/CBS = -1038.830341

\*xyz 1 1

Ru -0.301263 -0.567871 -0.635666

C -0.877037 -1.464626 1.208421

N 0.823561 1.208209 -0.316426

C -1.551451 -0.835892 2.401142

|   |           |           |           |
|---|-----------|-----------|-----------|
| C | 0.546525  | -1.542617 | 1.071237  |
| C | -1.664541 | -2.061460 | 0.173090  |
| C | -1.752953 | 0.907670  | -0.709776 |
| C | 0.146223  | 2.315585  | -0.281421 |
| C | 2.223979  | 1.217462  | -0.077910 |
| C | -0.756273 | 0.289863  | 3.041723  |
| C | -1.849748 | -1.940061 | 3.414829  |
| H | -2.512050 | -0.424475 | 2.037953  |
| C | 1.163914  | -2.212421 | -0.017843 |
| H | 1.182807  | -1.037223 | 1.803499  |
| C | -1.053318 | -2.617793 | -0.962635 |
| H | -2.754359 | -1.978440 | 0.217944  |
| C | -3.111401 | 0.771042  | -1.003407 |
| C | -1.274538 | 2.225714  | -0.491870 |
| H | 0.654163  | 3.278322  | -0.123065 |
| C | 2.751114  | 1.862275  | 1.044197  |
| C | 3.070413  | 0.545207  | -0.964069 |
| H | -0.491587 | 1.076221  | 2.316159  |
| H | 0.172611  | -0.080093 | 3.508450  |
| H | -1.351058 | 0.756753  | 3.841450  |
| H | -2.468792 | -2.740209 | 2.978909  |
| H | -0.911344 | -2.394400 | 3.777440  |
| H | -2.385148 | -1.528187 | 4.284235  |
| C | 0.376168  | -2.701590 | -1.071304 |
| H | 2.252980  | -2.217425 | -0.103339 |
| H | -1.671010 | -2.951596 | -1.800343 |
| C | -3.954124 | 1.889778  | -1.045832 |
| H | -3.542252 | -0.215067 | -1.207008 |
| C | -2.110655 | 3.345935  | -0.529271 |
| C | 4.126432  | 1.846258  | 1.265786  |
| H | 2.078422  | 2.354856  | 1.752385  |
| C | 4.442246  | 0.540563  | -0.738088 |
| H | 2.642937  | 0.041041  | -1.836590 |
| C | 0.988646  | -3.231927 | -2.323994 |
| C | -3.464253 | 3.172240  | -0.800958 |
| H | -5.016452 | 1.751989  | -1.266751 |
| H | -1.697186 | 4.343531  | -0.353144 |
| C | 4.973897  | 1.189500  | 0.376998  |
| H | 4.534900  | 2.344938  | 2.147871  |
| H | 5.102551  | 0.025762  | -1.439901 |
| H | 0.441421  | -2.877281 | -3.210583 |
| H | 0.934194  | -4.332984 | -2.328867 |
| H | 2.044128  | -2.939966 | -2.414329 |
| H | -4.136312 | 4.032623  | -0.828212 |
| H | 6.051466  | 1.175929  | 0.555831  |

\*

-----

**INT(E-H)+S**

CPCM (MeOH)  
M06 SCF (DZ) = -1155.116662  
G (1 atm) = -1154.714308  
qh-G (1 mol/L) = -1154.707077  
qh-G (24.56 mol/L) = -1154.704055  
Lowest Frequency = 22.89

HF SCF energy (TZ) = -1148.495249  
HF SCF energy (QZ) = -1148.562149  
Correlation energy (DZ) = -4.392199  
Correlation energy (TZ) = -5.351260  
DLPNO-CCSD(T1)/CBS = -1154.493980

\*xyz 1 1

|    |           |           |           |
|----|-----------|-----------|-----------|
| Ru | -0.199110 | -0.572104 | -0.377054 |
| C  | -1.691630 | 0.831683  | -0.666527 |
| N  | 0.831159  | 1.264713  | -0.124521 |

**INT(E-H)+S**

CPCM (MeOH)  
wB97X-D3 SCF (DZ) = -1155.721179  
G (1 atm) = -1155.307423  
qh G-E (1 mol/L) = 0.423922  
qh G-E (24.56 mol/L) = 0.426944  
Lowest Frequency = 13.73

HF SCF energy (TZ) = -1148.497587  
HF SCF energy (QZ) = -1148.563088  
Correlation energy (DZ) = -4.392766  
Correlation energy (TZ) = -5.351862  
DLPNO-CCSD(T1)/CBS = -1154.495120

SMD (MeOH)

HF SCF energy (TZ) = -1148.511656  
HF SCF energy (QZ) = -1148.577108  
Correlation energy (DZ) = -4.391094

```

C -3.022115 0.617856 -1.040237
C -1.273857 2.182032 -0.539074
O 0.127768 -0.133420 -2.527954
C 0.122763 2.344972 -0.234694
C 2.204694 1.343082 0.222938
C -3.899617 1.692152 -1.225704
H -3.401056 -0.399020 -1.189454
C -2.147147 3.260631 -0.727486
C 0.497588 -1.116129 -3.495847
H -0.640404 0.362688 -2.853356
H 0.586390 3.335693 -0.120071
C 2.611647 2.071512 1.343370
C 3.145113 0.651519 -0.545717
C -3.472069 3.011262 -1.063264
H -4.939132 1.492716 -1.501969
H -1.779557 4.285275 -0.615654
H 0.613563 -0.642609 -4.480803
H -0.250849 -1.922668 -3.557560
H 1.465760 -1.528871 -3.184296
C 3.962603 2.119729 1.681352
H 1.861616 2.576802 1.959289
C 4.491499 0.711039 -0.204978
H 2.806592 0.080851 -1.415172
H -4.170519 3.838078 -1.209423
C 4.903999 1.443887 0.909197
H 4.277367 2.683864 2.562516
H 5.226260 0.180131 -0.814885
H 5.962021 1.480611 1.178820
C 0.268188 -1.185244 1.627131
C -1.131187 -1.329724 1.428356
C 1.222060 -1.896943 0.834320
H 0.634538 -0.503917 2.399717
C -2.159116 -0.685813 2.325277
C -1.550740 -2.138677 0.325124
C 0.807179 -2.676203 -0.248144
H 2.289979 -1.755947 1.022754
C -1.674463 0.577294 3.017286
C -2.620814 -1.723253 3.347302
H -3.020190 -0.423194 1.682080
C -0.603291 -2.737513 -0.525202
H -2.615930 -2.224586 0.093193
C 1.791531 -3.400831 -1.106273
H -1.291901 1.322774 2.300789
H -0.879230 0.358937 3.750409
H -2.504086 1.039304 3.574075
H -3.019428 -2.628416 2.861951
H -1.779384 -2.026747 3.994228
H -3.410203 -1.304970 3.991118
H -0.949078 -3.276513 -1.411740
H 2.751749 -2.865722 -1.159604
H 1.989794 -4.397157 -0.677860
H 1.409005 -3.560349 -2.124471

```

\*-----

```

Correlation energy (TZ) = -5.350415
DLPNO-CCSD(T1)/CBS = -1154.507810

```

```

* xyz 1 1
Ru -0.214298 -0.550723 -0.333713
C -1.686474 0.875294 -0.593214
N 0.870945 1.254252 -0.165179
C -3.042992 0.697830 -0.896858
C -1.226473 2.214696 -0.531276
C 0.195682 2.348140 -0.281464
C 2.266549 1.308491 0.125914
C -3.893740 1.793849 -1.081572
C -2.067393 3.317783 -0.719504
C 2.722791 1.965943 1.269573
C 3.166424 0.655840 -0.720801
C -3.415743 3.103575 -0.989099
C 4.088608 1.981369 1.555999
C 4.527415 0.681973 -0.431221
C 4.992275 1.343460 0.708194
C 0.168846 -1.125204 1.705810
C -1.202625 -1.349971 1.432843
C 1.199181 -1.766216 0.945346
C -2.315248 -0.777064 2.287907
C -1.525274 -2.174860 0.306478
C 0.889247 -2.573746 -0.152455
C -1.961197 0.542405 2.970479
C -2.737274 -1.843629 3.307184
C -0.501846 -2.719168 -0.490006
C 1.963093 -3.259239 -0.948823
H -3.460870 -0.308493 -0.990750
H 0.689888 3.325257 -0.208895
H -4.950335 1.620116 -1.302326
H -1.662924 4.331613 -0.658733
H 2.006391 2.444345 1.941219
H 2.793003 0.136243 -1.605027
H -4.091349 3.948271 -1.136758
H 4.444042 2.490508 2.454285
H 5.229653 0.179018 -1.099223
H 6.059907 1.355830 0.936775
H 0.457289 -0.443235 2.505589
H 2.244058 -1.557168 1.182972
H -3.166335 -0.594928 1.611625
H -2.567666 -2.328931 0.024363
H -1.616919 1.292358 2.242297
H -1.177921 0.412354 3.733963
H -2.850090 0.944788 3.477975
H -3.038905 -2.778442 2.810636
H -1.908493 -2.074339 3.995979
H -3.589069 -1.485516 3.904256
H -0.773229 -3.270420 -1.392774
H 2.888899 -2.667913 -0.957439
H 2.185268 -4.234908 -0.489672
H 1.643846 -3.444982 -1.982342
O -0.013427 -0.184825 -2.492987
C 0.532887 -1.107157 -3.445646
H -0.855934 0.155156 -2.828680
H 0.554289 -0.631720 -4.435282
H -0.058009 -2.034195 -3.484558
H 1.557899 -1.329221 -3.127785

```

\*-----

```

INT(E-H)*S•AcO-
CPCM (MeOH)
wB97X-D3 SCF (DZ) = -1384.325990
G (1 atm) = -1383.869000

```

qh G-E (1 mol/L) = 0.469330  
qh G-E (24.56 mol/L) = 0.472353  
Lowest Frequency = 5.78

HF SCF energy (TZ) = -1375.932138  
HF SCF energy (QZ) = -1376.014485  
Correlation energy (DZ) = -5.097820  
Correlation energy (TZ) = -6.230096  
DLPNO-CCSD(T1)/CBS = -1382.931023

SMD (MeOH)  
HF SCF energy (TZ) = -1375.949709  
HF SCF energy (QZ) = -1376.031734  
Correlation energy (DZ) = -5.093271  
Correlation energy (TZ) = -6.226452  
DLPNO-CCSD(T1)/CBS = -1382.945060

\* xyz 1 1  
Ru -0.060453 0.037421 -0.536202  
C 1.166746 0.704379 0.980860  
N -1.272573 -0.231468 1.186093  
C 0.600778 0.644369 2.277660  
C 2.486312 1.172654 0.901054  
C -2.612928 -0.716092 1.154503  
C -0.748560 0.122158 2.314945  
C 1.295073 1.034051 3.432248  
C 3.186151 1.568071 2.043223  
C -2.901716 -1.871166 0.421301  
C -3.637976 -0.031213 1.813150  
C 2.597103 1.505262 3.311778  
C -4.206060 -2.354649 0.376075  
C -4.943737 -0.518656 1.756844  
C -5.231513 -1.681027 1.042887  
C 0.354958 1.829928 -1.654057  
C 0.962930 0.739316 -2.338929  
C -1.028574 1.828492 -1.336209  
C 0.184122 -0.386526 -2.719047  
C -1.728121 2.973024 -0.626487  
C -1.783343 0.680375 -1.733665  
C 0.837368 -1.562570 -3.386118  
C -1.211427 -0.394707 -2.443165  
C -0.845969 3.720257 0.372306  
C -2.312839 3.924268 -1.678841  
H 2.992109 1.221912 -0.067646  
H -1.303745 0.007317 3.254555  
H 0.813914 0.960710 4.411451  
H 4.213127 1.930594 1.944918  
H -2.097757 -2.384508 -0.109896  
H -3.415401 0.894416 2.348864  
H 3.157205 1.817170 4.195622  
H -4.423305 -3.262889 -0.189875  
H -5.742189 0.022549 2.268828  
H -6.255205 -2.058081 0.996961  
H 0.987214 2.650815 -1.313402  
H 2.036696 0.743504 -2.526692  
H -2.566237 2.521855 -0.067908  
H -2.831017 0.613522 -1.428769  
H 1.845370 -1.726321 -2.983292  
H 0.915137 -1.363205 -4.466161  
H 0.241893 -2.474842 -3.248704  
H -1.816420 -1.264544 -2.700824  
H -0.413389 3.036789 1.117700  
H -0.019123 4.249004 -0.128432  
H -1.443237 4.475825 0.904050  
H -2.977021 3.390608 -2.375678  
H -1.506212 4.392308 -2.266856

|   |           |           |           |
|---|-----------|-----------|-----------|
| H | -2.893408 | 4.725620  | -1.197554 |
| O | 3.095263  | -1.891741 | -1.090239 |
| C | 4.074184  | -1.938485 | -0.256492 |
| C | 5.451676  | -1.772049 | -0.884288 |
| O | 3.962934  | -2.098502 | 0.966795  |
| H | 5.534156  | -0.766068 | -1.324092 |
| H | 5.584264  | -2.495457 | -1.702469 |
| H | 6.244172  | -1.906990 | -0.137120 |
| O | 0.802519  | -1.907590 | -0.182355 |
| C | 0.742975  | -2.614192 | 1.047068  |
| H | 1.817601  | -1.903429 | -0.521749 |
| H | -0.304781 | -2.846768 | 1.283666  |
| H | 1.300287  | -3.557862 | 0.947103  |
| H | 1.183108  | -2.038632 | 1.876528  |

\*

-----

**INT(E-H)<sup>+</sup>S<sub>2</sub>•AcO<sup>-</sup>**

CPCM (MeOH)

|                        |              |
|------------------------|--------------|
| wB97X-D3 SCF (DZ) =    | -1500.047477 |
| G (1 atm) =            | -1499.539171 |
| qh G-E (1 mol/L) =     | 0.522798     |
| qh G-E (24.56 mol/L) = | 0.525821     |
| Lowest Frequency =     | 14.84        |

SMD (MeOH)

|                           |              |
|---------------------------|--------------|
| HF SCF energy (TZ) =      | -1491.047260 |
| HF SCF energy (QZ) =      | -1491.137490 |
| Correlation energy (DZ) = | -5.473605    |
| Correlation energy (TZ) = | -6.698064    |
| DLPNO-CCSD(T1)/CBS =      | -1498.578237 |

\* xyz 1 1

|    |           |           |           |
|----|-----------|-----------|-----------|
| Ru | 0.043904  | 0.015449  | -0.434335 |
| C  | 1.194027  | 0.806772  | 1.082062  |
| O  | -0.522467 | -3.891246 | -0.506577 |
| C  | 2.527234  | 1.241558  | 1.038332  |
| C  | 0.562347  | 0.855419  | 2.349173  |
| O  | 0.886814  | -1.907039 | 0.125524  |
| C  | -0.992985 | -4.358584 | -1.611296 |
| H  | -0.588452 | -4.821790 | 0.917420  |
| C  | 3.176202  | 1.710506  | 2.183730  |
| H  | 3.084842  | 1.209658  | 0.098015  |
| C  | 1.204570  | 1.319403  | 3.505382  |
| C  | -0.787860 | 0.332978  | 2.364001  |
| C  | 1.251149  | -2.313586 | 1.442174  |
| H  | 0.317940  | -2.659620 | -0.261974 |
| C  | -2.015520 | -5.472521 | -1.455002 |
| O  | -0.693373 | -3.940624 | -2.738801 |
| O  | -0.631516 | -5.325439 | 1.763210  |
| C  | 2.521619  | 1.755683  | 3.420058  |
| H  | 4.215174  | 2.044409  | 2.113398  |
| H  | 0.672740  | 1.327091  | 4.460792  |
| N  | -1.256062 | -0.123691 | 1.248290  |
| H  | -1.389714 | 0.300259  | 3.281463  |
| H  | 0.449802  | -2.101820 | 2.167685  |
| H  | 1.442536  | -3.396295 | 1.440826  |
| H  | 2.160460  | -1.776489 | 1.741199  |
| H  | -3.007456 | -5.010061 | -1.324567 |
| H  | -1.807899 | -6.076113 | -0.561307 |
| H  | -2.048981 | -6.103514 | -2.352331 |
| C  | -1.655400 | -4.736422 | 2.530393  |
| H  | 3.041545  | 2.123703  | 4.306753  |
| C  | -2.599019 | -0.603735 | 1.201679  |
| H  | -1.439298 | -3.682558 | 2.794358  |
| H  | -1.757086 | -5.302083 | 3.469751  |



|   |           |           |           |
|---|-----------|-----------|-----------|
| H | -2.636362 | -4.754899 | 2.017822  |
| C | -3.648184 | 0.177381  | 1.694974  |
| C | -2.859706 | -1.848945 | 0.624312  |
| C | -4.958442 | -0.295442 | 1.618994  |
| H | -3.439675 | 1.163861  | 2.115710  |
| C | -4.170752 | -2.314127 | 0.558811  |
| H | -2.035408 | -2.457029 | 0.242824  |
| C | -5.223976 | -1.540896 | 1.051743  |
| H | -5.775596 | 0.322206  | 1.997448  |
| H | -4.369101 | -3.292242 | 0.114686  |
| H | -6.250630 | -1.907359 | 0.987975  |
| C | 0.201047  | 1.824541  | -1.582216 |
| C | 1.140369  | 0.888560  | -2.114515 |
| C | -1.172157 | 1.495947  | -1.465766 |
| H | 0.564954  | 2.781235  | -1.207185 |
| C | 0.714364  | -0.397550 | -2.503292 |
| H | 2.200710  | 1.141602  | -2.149114 |
| C | -2.207089 | 2.464078  | -0.924075 |
| C | -1.598037 | 0.208194  | -1.943293 |
| C | 1.697213  | -1.434358 | -2.967689 |
| C | -0.685539 | -0.721167 | -2.446204 |
| C | -1.671919 | 3.416871  | 0.143027  |
| C | -2.830304 | 3.227661  | -2.099337 |
| H | -2.997331 | 1.847725  | -0.463865 |
| H | -2.644747 | -0.079969 | -1.820400 |
| H | 1.294772  | -2.442132 | -2.798389 |
| H | 1.864693  | -1.313099 | -4.049428 |
| H | 2.663070  | -1.323897 | -2.456716 |
| H | -0.999437 | -1.734648 | -2.708344 |
| H | -2.501053 | 4.002600  | 0.566725  |
| H | -0.943997 | 4.132413  | -0.271301 |
| H | -1.184778 | 2.871600  | 0.965226  |
| H | -3.256048 | 2.538240  | -2.844386 |
| H | -2.072198 | 3.848498  | -2.604161 |
| H | -3.635539 | 3.889692  | -1.747136 |

\*

-----

**INT(E-H)\*S•Cl<sup>-</sup>**

CPCM (MeOH)  
wB97X-D3 SCF (DZ) = -1616.120814  
G (1 atm) = -1615.625586  
qh G-E (1 mol/L) = 0.423421  
qh G-E (24.56 mol/L) = 0.426444  
Lowest Frequency = 24.83

HF SCF energy (TZ) = -1608.179957  
HF SCF energy (QZ) = -1608.249651  
Correlation energy (DZ) = -4.561596  
Correlation energy (TZ) = -5.594684  
DLPNO-CCSD(T1)/CBS = -1614.469005

SMD (MeOH)  
HF SCF energy (TZ) = -1608.187277  
HF SCF energy (QZ) = -1608.257154  
Correlation energy (DZ) = -4.560322  
Correlation energy (TZ) = -5.593704  
DLPNO-CCSD(T1)/CBS = -1614.475754

\* xyz 1 1

|    |           |           |           |
|----|-----------|-----------|-----------|
| Ru | -0.593026 | -0.373232 | 0.445289  |
| C  | -0.660999 | 0.029958  | 2.552985  |
| C  | -1.902343 | 1.169333  | 0.049244  |
| C  | 0.698033  | -0.040580 | 2.160395  |
| C  | -1.560085 | -1.048580 | 2.284020  |
| N  | 0.554137  | 0.876712  | -0.841448 |

|    |           |           |           |
|----|-----------|-----------|-----------|
| C  | -1.373969 | 2.202594  | -0.764880 |
| C  | -3.238822 | 1.317781  | 0.447542  |
| C  | 1.690328  | 1.076418  | 2.422768  |
| C  | 1.159097  | -1.252702 | 1.537345  |
| C  | -1.113892 | -2.190836 | 1.590174  |
| C  | 1.889362  | 0.603236  | -1.263257 |
| C  | -0.020999 | 1.969989  | -1.224647 |
| C  | -2.116238 | 3.328940  | -1.145933 |
| C  | -3.986465 | 2.440048  | 0.078338  |
| C  | 1.058443  | 2.465207  | 2.492380  |
| C  | 2.473407  | 0.751441  | 3.700935  |
| C  | 0.281147  | -2.297821 | 1.251524  |
| C  | -2.065749 | -3.285012 | 1.198724  |
| C  | 2.194705  | -0.661141 | -1.774568 |
| C  | 2.890135  | 1.571418  | -1.138741 |
| C  | -3.431819 | 3.451642  | -0.713507 |
| C  | 3.497167  | -0.945859 | -2.175495 |
| C  | 4.193474  | 1.274192  | -1.536773 |
| C  | 4.501136  | 0.017406  | -2.055853 |
| H  | -1.050251 | 0.940521  | 3.007724  |
| H  | -2.615582 | -0.952302 | 2.540940  |
| H  | -3.720603 | 0.546520  | 1.054906  |
| H  | 2.400508  | 1.063912  | 1.579254  |
| H  | 2.194659  | -1.312503 | 1.194834  |
| H  | 0.492409  | 2.668013  | -1.898177 |
| H  | -1.662849 | 4.094876  | -1.781157 |
| H  | -5.023543 | 2.527619  | 0.413959  |
| H  | 0.454365  | 2.684002  | 1.598565  |
| H  | 0.412426  | 2.574130  | 3.378032  |
| H  | 1.847182  | 3.228273  | 2.566748  |
| H  | 2.968433  | -0.229096 | 3.630373  |
| H  | 1.801960  | 0.732548  | 4.574787  |
| H  | 3.248494  | 1.511603  | 3.880241  |
| H  | 0.624977  | -3.156402 | 0.672064  |
| H  | -1.801563 | -3.695282 | 0.214224  |
| H  | -2.004054 | -4.101883 | 1.934130  |
| H  | -3.100593 | -2.918863 | 1.172105  |
| H  | 1.413559  | -1.420760 | -1.861360 |
| H  | 2.653805  | 2.546494  | -0.706290 |
| H  | -4.028587 | 4.321676  | -0.994543 |
| H  | 3.727853  | -1.933669 | -2.580451 |
| H  | 4.973782  | 2.030226  | -1.426468 |
| H  | 5.524110  | -0.215499 | -2.358607 |
| O  | -1.403673 | -1.332023 | -1.336945 |
| C  | -1.686437 | -0.707088 | -2.589870 |
| H  | -0.898541 | -2.173581 | -1.537338 |
| H  | -2.107549 | -1.457253 | -3.274395 |
| H  | -0.778087 | -0.275162 | -3.039458 |
| H  | -2.424555 | 0.085714  | -2.419268 |
| Cl | 0.040702  | -3.801761 | -2.091638 |

\*

-----  
**INT(E-H)<sup>+</sup>S<sub>2</sub>•Cl<sup>-</sup>**

CPCM (MeOH)

wB97X-D3 SCF (DZ) = -1731.834033

G (1 atm) = -1731.373757

qh G-E (1 mol/L) = 0.473207

qh G-E (24.56 mol/L) = 0.476230

Lowest Frequency = 21.93

SMD (MeOH)

HF SCF energy (TZ) = -1723.285279

HF SCF energy (QZ) = -1723.363444

Correlation energy (DZ) = -4.939919

Correlation energy (TZ) = -6.065104

DLPNO-CCSD(T1)/CBS = -1730.109586

```
* xyz 1 1
Ru -1.108969 -0.181478 0.422223
C -0.853739 0.100195 2.534195
C -2.003356 1.668994 0.261475
C 0.398858 -0.270160 1.985621
C -2.011843 -0.713607 2.338447
H -0.958393 1.049501 3.059532
O -2.360668 -0.768017 -1.270580
Cl -1.745600 -3.388218 -2.557750
C -1.327669 2.586491 -0.580726
C -3.191898 2.127290 0.848618
C 1.658480 0.552704 2.177446
C 0.481539 -1.521184 1.282247
C -1.930208 -1.889116 1.565564
H -2.978433 -0.381613 2.718839
C -2.682320 0.024343 -2.416134
H -2.115835 -1.672407 -1.606790
H -0.663097 -4.641133 -1.213603
C -1.785559 3.890806 -0.812295
C -0.152507 2.045485 -1.230076
C -3.655503 3.427822 0.628365
H -3.780481 1.466477 1.490993
C 1.413587 2.057071 2.275872
C 2.405123 0.026129 3.409842
H 2.289618 0.364808 1.292466
C -0.647412 -2.312711 1.071552
H 1.432374 -1.813254 0.830058
C -3.155366 -2.700519 1.256417
H -1.777844 0.298328 -2.982040
H -3.357759 -0.551292 -3.064538
H -3.189948 0.932494 -2.070954
O -0.105924 -5.125685 -0.570059
C -2.956644 4.316688 -0.195800
H -1.225286 4.557507 -1.473473
N 0.157795 0.818577 -0.963792
H 0.440827 2.632771 -1.942519
H -4.581716 3.756129 1.108176
H 0.848386 2.435126 1.411193
H 0.859723 2.323297 3.190063
H 2.376689 2.587319 2.310736
H 2.623215 -1.048858 3.318462
H 1.802919 0.175434 4.320848
H 3.359372 0.558831 3.538095
H -0.566304 -3.228029 0.479540
H -3.079704 -3.159496 0.260961
H -3.254139 -3.509832 1.996167
H -4.061761 -2.081986 1.298167
C 1.238393 -4.914631 -0.951091
H -3.331815 5.329314 -0.356492
C 1.313184 0.245668 -1.573555
H 1.429865 -5.215235 -1.997295
H 1.549341 -3.858459 -0.838049
H 1.878140 -5.527287 -0.298412
C 1.210543 -1.008953 -2.179964
C 2.539098 0.917302 -1.548334
C 2.330127 -1.575010 -2.783992
H 0.253471 -1.536502 -2.187264
C 3.656803 0.337797 -2.148485
H 2.620404 1.881563 -1.040994
C 3.555677 -0.905915 -2.770586
H 2.241905 -2.551211 -3.265810
H 4.613947 0.862850 -2.120664
H 4.432572 -1.358039 -3.238584
```

\*

-----

INT(F<sup>c</sup>-F<sup>s</sup>)

CPCM (MeOH)

M06 SCF (DZ) = -1612.648340  
G (1 atm) = -1612.143949  
qh-G (1 mol/L) = -1612.135022  
qh-G (24.56 mol/L) = -1612.132  
Lowest Frequency = 25.14

HF SCF energy (TZ) = -1603.882585  
HF SCF energy (QZ) = -1603.980815  
Correlation energy (DZ) = -5.732106  
Correlation energy (TZ) = -7.031404  
DLPNO-CCSD(T1)/CBS = -1611.801043

\*xyz 0 1

|    |           |           |           |
|----|-----------|-----------|-----------|
| Ru | -0.309845 | 0.004325  | -0.303596 |
| C  | -1.466600 | -1.637126 | -1.474793 |
| C  | -2.425210 | -0.660038 | -1.152656 |
| C  | -1.443252 | -2.884992 | -0.778142 |
| H  | -0.890821 | -1.553330 | -2.400577 |
| N  | 1.302409  | 1.044049  | 0.529592  |
| O  | -0.466934 | 1.277255  | -2.031384 |
| O  | -1.560182 | 0.777659  | 1.258657  |
| O  | 1.191152  | -0.919978 | -1.492212 |
| O  | -0.423944 | -1.040882 | 1.565846  |
| C  | -3.411651 | -0.913592 | -0.149875 |
| H  | -2.588762 | 0.179677  | -1.834767 |
| C  | -0.409327 | -3.898643 | -1.149497 |
| C  | -2.380083 | -3.093307 | 0.206758  |
| C  | 1.179635  | 2.477824  | 0.515785  |
| C  | 2.465476  | 0.637106  | 0.937436  |
| C  | -1.136149 | 2.522906  | -1.955169 |
| H  | 0.487444  | 1.343845  | -2.352449 |
| C  | -1.226468 | -0.173761 | 2.030369  |
| C  | 2.044469  | -0.338021 | -2.243901 |
| C  | -4.489715 | 0.122476  | 0.062539  |
| C  | -3.361632 | -2.117385 | 0.515611  |
| H  | 0.598333  | -3.448923 | -1.112883 |
| H  | -0.551407 | -4.253653 | -2.185306 |
| H  | -0.434871 | -4.775079 | -0.484535 |
| H  | -2.377793 | -4.039377 | 0.758776  |
| C  | 0.383696  | 3.129346  | 1.458345  |
| C  | 1.888287  | 3.210736  | -0.438790 |
| C  | 3.058467  | -0.692262 | 1.048459  |
| H  | 3.165243  | 1.434344  | 1.238708  |
| H  | -0.674587 | 3.201161  | -1.218721 |
| H  | -1.144530 | 3.007930  | -2.944435 |
| H  | -2.177082 | 2.331829  | -1.650631 |
| C  | -1.738819 | -0.274855 | 3.425742  |
| C  | 3.237970  | -1.182106 | -2.610897 |
| O  | 1.975577  | 0.843047  | -2.655398 |
| C  | -5.551655 | -0.001500 | -1.029853 |
| C  | -5.138265 | 0.071898  | 1.435688  |
| H  | -3.999572 | 1.109519  | -0.049024 |
| H  | -4.099774 | -2.346618 | 1.290747  |
| C  | 0.292839  | 4.518487  | 1.435216  |
| H  | -0.158153 | 2.541715  | 2.200870  |
| C  | 1.786705  | 4.600117  | -0.455318 |
| H  | 2.487630  | 2.671552  | -1.177964 |
| C  | 2.404933  | -1.926498 | 0.884500  |
| C  | 4.435441  | -0.696024 | 1.340656  |
| H  | -2.338443 | 0.605574  | 3.690332  |
| H  | -0.897676 | -0.378397 | 4.126741  |
| H  | -2.356884 | -1.181545 | 3.520768  |

|   |           |           |           |
|---|-----------|-----------|-----------|
| H | 2.949236  | -2.234260 | -2.746459 |
| H | 3.955550  | -1.146492 | -1.772548 |
| H | 3.734794  | -0.797751 | -3.511303 |
| H | -6.312877 | 0.790561  | -0.934005 |
| H | -6.064006 | -0.976979 | -0.953223 |
| H | -5.113974 | 0.068310  | -2.038953 |
| H | -5.847270 | 0.906561  | 1.556336  |
| H | -4.391140 | 0.138532  | 2.242567  |
| H | -5.711701 | -0.860782 | 1.577845  |
| C | 0.988003  | 5.257631  | 0.478207  |
| H | -0.325095 | 5.028701  | 2.178514  |
| H | 2.337526  | 5.171764  | -1.206686 |
| C | 3.119292  | -3.112131 | 0.996425  |
| H | 1.338695  | -1.951584 | 0.672263  |
| C | 5.149027  | -1.884377 | 1.437398  |
| H | 4.953100  | 0.257641  | 1.482473  |
| H | 0.909969  | 6.347488  | 0.463988  |
| C | 4.489603  | -3.098803 | 1.262519  |
| H | 2.598469  | -4.065143 | 0.870597  |
| H | 6.219483  | -1.861979 | 1.653845  |
| H | 5.041838  | -4.038890 | 1.339515  |

\*

-----

**cis-INT(F<sup>A</sup>-G<sup>A</sup>)**

CPCM (MeOH)

|                      |              |
|----------------------|--------------|
| M06 SCF (DZ) =       | -1664.123868 |
| G (1 atm) =          | -1663.681644 |
| qh-G (1 mol/L) =     | -1663.671473 |
| qh-G (24.56 mol/L) = | -1663.674492 |
| Lowest Frequency =   | 24.41        |

|                           |              |
|---------------------------|--------------|
| HF SCF energy (TZ) =      | -1655.132652 |
| HF SCF energy (QZ) =      | -1655.233360 |
| Correlation energy (DZ) = | -5.855073    |
| Correlation energy (TZ) = | -7.168243    |
| DLPNO-CCSD(T1)/CBS =      | -1663.199280 |

\*xyz 0 1

|    |           |           |           |
|----|-----------|-----------|-----------|
| Ru | 0.879866  | -0.193903 | 0.073848  |
| C  | 2.637884  | 1.020318  | -0.610985 |
| N  | -0.901343 | -0.911920 | 0.916391  |
| C  | 3.908317  | 1.138536  | -0.035562 |
| C  | 2.109694  | 2.110926  | -1.344396 |
| H  | 2.387450  | -0.082476 | -0.897484 |
| O  | 2.881383  | -2.096404 | -1.410944 |
| N  | 0.006508  | 1.038548  | -1.348278 |
| O  | 2.040135  | -1.049999 | 1.702062  |
| O  | 0.669753  | -1.723892 | -1.313902 |
| O  | 1.226546  | 0.956450  | 1.892285  |
| C  | -1.041715 | -2.345158 | 0.842780  |
| C  | -1.943768 | -0.311770 | 1.405939  |
| C  | 4.626516  | 2.323882  | -0.160669 |
| H  | 4.331881  | 0.285190  | 0.502666  |
| C  | 2.853974  | 3.288294  | -1.488286 |
| C  | 0.757306  | 1.994137  | -1.821530 |
| C  | 1.712660  | -2.414173 | -1.648691 |
| C  | -1.351977 | 0.982920  | -1.780956 |
| C  | 1.915036  | 0.011190  | 2.386543  |
| C  | -0.095746 | -3.184312 | 1.433800  |
| C  | -2.128622 | -2.896167 | 0.158876  |
| C  | -2.285496 | 1.099807  | 1.534310  |
| H  | -2.749641 | -0.972425 | 1.763372  |
| C  | 4.105839  | 3.395025  | -0.894640 |
| H  | 5.612833  | 2.412048  | 0.301929  |
| H  | 2.428885  | 4.127914  | -2.046014 |

**cis-INT(F<sup>A</sup>-G<sup>A</sup>)**

CPCM (MeOH)

|                        |              |
|------------------------|--------------|
| wB97X-D3 SCF (DZ) =    | -1664.894786 |
| G (1 atm) =            | -1664.437372 |
| qh G-E (1 mol/L) =     | 0.471867     |
| qh G-E (24.56 mol/L) = | 0.474890     |
| Lowest Frequency =     | 15.2         |

|                           |              |
|---------------------------|--------------|
| HF SCF energy (TZ) =      | -1655.145402 |
| HF SCF energy (QZ) =      | -1655.244498 |
| Correlation energy (DZ) = | -5.845770    |
| Correlation energy (TZ) = | -7.157849    |
| DLPNO-CCSD(T1)/CBS =      | -1663.198900 |

SMD (MeOH)

|                           |              |
|---------------------------|--------------|
| HF SCF energy (TZ) =      | -1655.162717 |
| HF SCF energy (QZ) =      | -1655.261557 |
| Correlation energy (DZ) = | -5.839507    |
| Correlation energy (TZ) = | -7.153033    |
| DLPNO-CCSD(T1)/CBS =      | -1663.211912 |

\*xyz 0 1

|    |           |           |           |
|----|-----------|-----------|-----------|
| Ru | 0.869914  | -0.209662 | 0.146406  |
| C  | 2.664302  | 1.009627  | -0.647780 |
| N  | -0.908215 | -0.939893 | 1.018631  |
| C  | 3.962737  | 1.104594  | -0.144200 |
| C  | 2.075283  | 2.125462  | -1.272906 |
| O  | 2.786359  | -1.985633 | -1.663909 |
| N  | -0.050607 | 1.077142  | -1.224122 |
| O  | 0.599754  | -1.736267 | -1.237430 |
| C  | -1.026403 | -2.382185 | 0.994973  |
| C  | -1.980013 | -0.349278 | 1.430691  |
| C  | 4.661600  | 2.307044  | -0.241423 |
| C  | 2.790785  | 3.322304  | -1.387587 |
| C  | 0.689125  | 2.023754  | -1.702438 |
| C  | 1.604494  | -2.336389 | -1.780908 |
| C  | -1.409902 | 1.020503  | -1.678324 |
| C  | -0.137036 | -3.176373 | 1.718107  |
| C  | -2.035897 | -2.976694 | 0.234345  |
| C  | -2.320800 | 1.079630  | 1.489946  |
| C  | 4.079699  | 3.412033  | -0.869005 |
| C  | 1.218965  | -3.546759 | -2.608127 |

|       |           |           |           |   |           |           |           |
|-------|-----------|-----------|-----------|---|-----------|-----------|-----------|
| H     | 0.361382  | 2.706377  | -2.557788 | C | -1.943920 | -0.210953 | -2.061918 |
| C     | 1.368077  | -3.695584 | -2.367500 | C | -2.194591 | 2.175890  | -1.731483 |
| C     | -1.919390 | -0.250414 | -2.109160 | C | -0.259429 | -4.563948 | 1.672858  |
| C     | -2.127678 | 2.146204  | -1.843973 | C | -2.148227 | -4.365189 | 0.188952  |
| C     | 2.593379  | 0.165315  | 3.704569  | C | -1.408051 | 2.138446  | 1.592804  |
| C     | -0.249656 | -4.564675 | 1.347103  | C | -3.695544 | 1.362795  | 1.439848  |
| H     | 0.754709  | -2.743714 | 1.955789  | C | -3.261126 | -0.278948 | -2.511343 |
| C     | -2.268704 | -4.279032 | 0.067550  | C | -3.512348 | 2.096961  | -2.176208 |
| H     | -2.854303 | -2.234420 | -0.322267 | C | -1.259541 | -5.164722 | 0.906635  |
| C     | -1.434079 | 2.196875  | 1.320761  | C | -1.869218 | 3.451308  | 1.617041  |
| C     | -3.625579 | 1.350045  | 1.886099  | C | -4.150449 | 2.677600  | 1.440878  |
| H     | 4.682435  | 4.316908  | -0.998829 | C | -4.049845 | 0.871325  | -2.568871 |
| H     | 0.690627  | -3.494340 | -3.210722 | C | -3.235089 | 3.726167  | 1.527526  |
| H     | 0.827255  | -4.358508 | -1.671570 | H | 2.345964  | -0.073139 | -0.889946 |
| H     | 2.272676  | -4.202890 | -2.726465 | H | 4.425844  | 0.230582  | 0.318350  |
| C     | -3.255149 | -0.312036 | -2.497347 | H | -2.806769 | -1.002274 | 1.742550  |
| H     | -1.293265 | -1.144809 | -2.058341 | H | 5.673970  | 2.380520  | 0.161489  |
| C     | -3.463636 | 2.073079  | -2.226030 | H | 2.324646  | 4.187544  | -1.864876 |
| H     | -1.692687 | 3.106464  | -1.554395 | H | 0.284431  | 2.747929  | -2.419130 |
| H     | 2.696767  | -0.805503 | 4.206087  | H | 0.654723  | -2.702139 | 2.295978  |
| H     | 3.604344  | 0.568975  | 3.532703  | H | -2.720508 | -2.350762 | -0.341042 |
| H     | 2.048812  | 0.873818  | 4.341702  | H | 4.634998  | 4.348396  | -0.951131 |
| C     | -1.331147 | -5.119300 | 0.662341  | H | 0.592994  | -3.229434 | -3.455417 |
| H     | 0.488033  | -5.215956 | 1.823188  | H | 0.616509  | -4.233820 | -1.995954 |
| H     | -3.118021 | -4.698743 | -0.477481 | H | 2.109959  | -4.062711 | -2.984917 |
| C     | -1.916650 | 3.492387  | 1.454844  | H | -1.308684 | -1.096445 | -2.003344 |
| H     | -0.390621 | 2.031449  | 1.060228  | H | -1.787814 | 3.128409  | -1.386661 |
| C     | -4.109743 | 2.647029  | 1.997264  | H | 0.436102  | -5.181385 | 2.245702  |
| H     | -4.297808 | 0.504707  | 2.061781  | H | -2.934508 | -4.821320 | -0.416589 |
| C     | -4.033787 | 0.843391  | -2.550365 | H | -0.344486 | 1.930388  | 1.682483  |
| H     | -3.692903 | -1.279179 | -2.760385 | H | -4.411591 | 0.539254  | 1.376500  |
| H     | -4.065612 | 2.984903  | -2.255343 | H | -3.673596 | -1.242439 | -2.819416 |
| H     | -1.440907 | -6.204295 | 0.592323  | H | -4.125644 | 3.000276  | -2.198792 |
| C     | -3.252633 | 3.724608  | 1.782351  | H | -1.345197 | -6.252747 | 0.868167  |
| H     | -1.240580 | 4.335594  | 1.291793  | H | -1.152304 | 4.270336  | 1.705705  |
| H     | -5.156539 | 2.817408  | 2.258744  | H | -5.220856 | 2.883466  | 1.379788  |
| H     | -5.084856 | 0.785465  | -2.843472 | H | -5.084920 | 0.811565  | -2.911982 |
| H     | -3.624313 | 4.748082  | 1.875877  | H | -3.587123 | 4.760174  | 1.536724  |
| *     |           |           |           | O | 2.079484  | -1.113957 | 1.700953  |
| ----- |           |           |           | O | 1.364537  | 0.923098  | 1.953066  |
|       |           |           |           | C | 2.041434  | -0.054671 | 2.399645  |
|       |           |           |           | C | 2.801023  | 0.055517  | 3.685013  |
|       |           |           |           | H | 2.946643  | -0.934584 | 4.133067  |
|       |           |           |           | H | 3.788479  | 0.490073  | 3.465757  |
|       |           |           |           | H | 2.277903  | 0.722880  | 4.380727  |
|       |           |           |           | * |           |           |           |
| ----- |           |           |           |   |           |           |           |

**INT(F<sup>A</sup>-G<sup>A</sup>)**  
 CPCM (MeOH)  
 M06 SCF (DZ) = -1664.124111  
 G (1 atm) = -1663.682060  
 qh-G (1 mol/L) = -1663.671801  
 qh-G (24.56 mol/L) = -1663.668778  
 Lowest Frequency = 18.33

HF SCF energy (TZ) = -1655.137733  
 HF SCF energy (QZ) = -1655.236656  
 Correlation energy (DZ) = -5.850985  
 Correlation energy (TZ) = -7.162890  
 DLPNO-CCSD(T1)/CBS = -1663.198312

\*xyz 0 1  
 Ru 0.020864 -0.363201 -0.055101  
 C 1.658038 -1.518198 0.971207  
 N 0.983625 1.458014 -0.600348

**INT(F<sup>A</sup>-G<sup>A</sup>)**  
 CPCM (MeOH)  
 wB97X-D3 SCF (DZ) = -1664.893235  
 G (1 atm) = -1664.436715  
 qh G-E (1 mol/L) = 0.472679  
 qh G-E (24.56 mol/L) = 0.475702  
 Lowest Frequency = 18.06

HF SCF energy (TZ) = -1655.144534  
 HF SCF energy (QZ) = -1655.243716  
 Correlation energy (DZ) = -5.845045  
 Correlation energy (TZ) = -7.156377  
 DLPNO-CCSD(T1)/CBS = -1663.196236

SMD (MeOH)  
 HF SCF energy (TZ) = -1655.162420  
 HF SCF energy (QZ) = -1655.261377  
 Correlation energy (DZ) = -5.838553

|   |           |           |           |
|---|-----------|-----------|-----------|
| C | 3.044272  | -1.316213 | 1.023700  |
| C | 1.172251  | -2.846292 | 1.127103  |
| H | 1.080755  | -0.586042 | 1.385602  |
| N | -0.956429 | -2.084162 | 0.510140  |
| O | 1.007277  | 1.127865  | 2.604634  |
| O | -1.296983 | -0.116608 | -1.729876 |
| O | -0.881210 | 0.723735  | 1.458943  |
| O | 0.465470  | -1.372018 | -1.915682 |
| C | 2.401579  | 1.360875  | -0.790465 |
| C | 0.546350  | 2.679511  | -0.628510 |
| C | 3.916794  | -2.389951 | 1.171092  |
| H | 3.439293  | -0.299839 | 0.963961  |
| C | 2.059657  | -3.915149 | 1.304491  |
| C | -0.240592 | -3.061569 | 0.979806  |
| C | -2.347609 | -2.267319 | 0.284751  |
| C | -0.195809 | 1.304532  | 2.392060  |
| C | -0.596005 | -0.910871 | -2.435589 |
| C | 3.264216  | 2.033351  | 0.079653  |
| C | 2.917999  | 0.591871  | -1.834124 |
| C | -0.778841 | 3.252553  | -0.405132 |
| H | 1.304774  | 3.454234  | -0.830396 |
| C | 3.430031  | -3.692081 | 1.318512  |
| H | 4.994344  | -2.205547 | 1.194003  |
| H | 1.658289  | -4.927940 | 1.404554  |
| H | -0.698030 | -4.023882 | 1.249377  |
| C | -3.233781 | -1.258800 | 0.677770  |
| C | -2.825309 | -3.411934 | -0.359257 |
| C | -1.005832 | 2.280378  | 3.209806  |
| C | -1.036272 | -1.307594 | -3.801021 |
| C | 4.642730  | 1.936497  | -0.098162 |
| H | 2.841138  | 2.592033  | 0.919232  |
| C | 4.296085  | 0.506472  | -2.007846 |
| H | 2.230326  | 0.058101  | -2.492728 |
| C | -0.790537 | 4.642986  | -0.188760 |
| C | -2.003139 | 2.563426  | -0.396709 |
| H | 4.121603  | -4.527814 | 1.445982  |
| C | -4.596447 | -1.419202 | 0.454592  |
| H | -2.828987 | -0.362856 | 1.157091  |
| C | -4.192693 | -3.557430 | -0.585553 |
| H | -2.121838 | -4.174480 | -0.705620 |
| H | -0.485484 | 2.538508  | 4.141361  |
| H | -1.143880 | 3.199602  | 2.614767  |
| H | -2.007260 | 1.882616  | 3.428191  |
| H | -0.187997 | -1.669395 | -4.395284 |
| H | -1.531571 | -0.467556 | -4.305425 |
| H | -1.771034 | -2.123417 | -3.709244 |
| C | 5.162876  | 1.174089  | -1.142091 |
| H | 5.313273  | 2.455349  | 0.591565  |
| H | 4.697758  | -0.090236 | -2.830834 |
| C | -1.975636 | 5.321627  | 0.069850  |
| H | 0.154139  | 5.194936  | -0.213298 |
| C | -3.187390 | 3.247784  | -0.156898 |
| H | -2.027457 | 1.496146  | -0.597078 |
| C | -5.081361 | -2.566578 | -0.175542 |
| H | -5.289523 | -0.635973 | 0.772890  |
| H | -4.562051 | -4.450517 | -1.095715 |
| H | 6.244075  | 1.097668  | -1.280745 |
| C | -3.180180 | 4.621967  | 0.088440  |
| H | -1.959147 | 6.399194  | 0.248526  |
| H | -4.132632 | 2.698360  | -0.160139 |
| H | -6.152800 | -2.682511 | -0.356123 |
| H | -4.117534 | 5.148920  | 0.284224  |

Correlation energy (TZ) = -7.151271  
DLPNO-CCSD(T1)/CBS = -1663.209533

\*xyz 0 1

|    |           |           |           |
|----|-----------|-----------|-----------|
| Ru | -0.307094 | -0.045253 | -0.059354 |
| C  | 0.935008  | -1.293851 | 1.356966  |
| N  | 1.197896  | 1.401781  | -0.662601 |
| C  | 0.205028  | -2.492309 | 1.529721  |
| C  | 2.295505  | -1.282620 | 1.680440  |
| H  | 0.447348  | -0.239797 | 1.528013  |
| N  | -1.685038 | -1.446943 | 0.584634  |
| O  | -1.412436 | 0.311691  | -1.842609 |
| O  | -0.059568 | -1.385167 | -1.778556 |
| O  | -1.184706 | 1.440617  | 1.080574  |
| C  | 0.703462  | 2.757151  | -0.582825 |
| C  | 2.459430  | 1.348849  | -0.925902 |
| C  | 0.849569  | -3.662436 | 1.946647  |
| C  | -1.212107 | -2.473086 | 1.210139  |
| C  | 2.934678  | -2.453100 | 2.083040  |
| H  | 2.853401  | -0.346751 | 1.624929  |
| C  | -3.075003 | -1.422461 | 0.254778  |
| C  | -0.931414 | -0.717142 | -2.415221 |
| C  | -0.765628 | 1.813052  | 2.242856  |
| C  | -0.253709 | 3.200791  | -1.494795 |
| C  | 1.181659  | 3.611971  | 0.411057  |
| C  | 3.350174  | 0.184282  | -1.049440 |
| H  | 2.980507  | 2.309756  | -1.047130 |
| C  | 2.216001  | -3.645110 | 2.210828  |
| H  | 0.274937  | -4.585583 | 2.053743  |
| H  | -1.861814 | -3.306044 | 1.505413  |
| H  | 4.002116  | -2.432401 | 2.313648  |
| C  | -3.662262 | -2.493872 | -0.421400 |
| C  | -3.831448 | -0.299806 | 0.600433  |
| C  | -1.413160 | -1.147641 | -3.763746 |
| C  | -1.574947 | 2.931248  | 2.865423  |
| O  | 0.198571  | 1.313366  | 2.838201  |
| C  | -0.729780 | 4.507210  | -1.408548 |
| H  | -0.628964 | 2.511717  | -2.251683 |
| C  | 0.693423  | 4.915620  | 0.495745  |
| H  | 1.912327  | 3.243561  | 1.134320  |
| C  | 2.952803  | -1.086727 | -1.480441 |
| C  | 4.697485  | 0.410319  | -0.723611 |
| H  | 2.721137  | -4.557907 | 2.532479  |
| C  | -5.022298 | -2.450198 | -0.729700 |
| H  | -3.051604 | -3.349762 | -0.717910 |
| C  | -5.189213 | -0.270268 | 0.295245  |
| H  | -3.336115 | 0.535265  | 1.098466  |
| H  | -2.244626 | -1.854417 | -3.618016 |
| H  | -1.782623 | -0.286527 | -4.333057 |
| H  | -0.612641 | -1.661282 | -4.309501 |
| H  | -2.529808 | 2.521705  | 3.230344  |
| H  | -1.803765 | 3.699340  | 2.114235  |
| H  | -1.034554 | 3.375668  | 3.709914  |
| C  | -0.262428 | 5.367830  | -0.413194 |
| H  | -1.475736 | 4.855062  | -2.126596 |
| H  | 1.061398  | 5.578349  | 1.282130  |
| C  | 3.885760  | -2.117252 | -1.555453 |
| H  | 1.915724  | -1.266068 | -1.758416 |
| C  | 5.621629  | -0.629056 | -0.775384 |
| H  | 5.017235  | 1.408017  | -0.411362 |
| C  | -5.789075 | -1.343654 | -0.367826 |
| H  | -5.481373 | -3.287860 | -1.258952 |
| H  | -5.784905 | 0.601215  | 0.575655  |
| H  | -0.646158 | 6.388039  | -0.345704 |
| C  | 5.215018  | -1.897433 | -1.192301 |
| H  | 3.568823  | -3.105669 | -1.895009 |

\*

|   |           |           |           |
|---|-----------|-----------|-----------|
| H | 6.662912  | -0.445569 | -0.502965 |
| H | -6.853621 | -1.312575 | -0.609266 |
| H | 5.939077  | -2.713675 | -1.245469 |

\*

-----

**INT(F<sup>c</sup>-G<sup>c</sup>)**

CPCM (MeOH)  
M06 SCF (DZ) = -1496.958421  
G (1 atm) = -1496.506496  
qh-G (1 mol/L) = -1496.497529  
qh-G (24.56 mol/L) = -1496.494506  
Lowest Frequency = 31.50

HF SCF energy (TZ) = -1488.759910  
HF SCF energy (QZ) = -1488.850373  
Correlation energy (DZ) = -5.365641  
Correlation energy (TZ) = -6.572188  
DLPNO-CCSD(T1)/CBS = -1496.154849

\*xyz 0 1

|    |           |           |           |
|----|-----------|-----------|-----------|
| Ru | 0.122840  | -0.268941 | -0.266967 |
| C  | 1.361550  | -2.094826 | -0.234639 |
| C  | -2.151897 | -0.495174 | -1.258643 |
| C  | 1.134160  | -3.392397 | -0.723261 |
| C  | 2.718081  | -1.680253 | -0.098469 |
| H  | 0.588097  | -1.763373 | 0.605667  |
| C  | -1.828581 | -1.784204 | -0.813544 |
| N  | 1.919079  | 0.476296  | 0.348463  |
| O  | -0.707348 | 0.048103  | 1.585369  |
| O  | 0.749838  | 0.087096  | -2.299199 |
| O  | -0.244867 | 1.644688  | -1.152305 |
| C  | -3.099579 | 0.301255  | -0.567622 |
| H  | -1.826241 | -0.178130 | -2.253800 |
| C  | 2.192092  | -4.210638 | -1.105769 |
| H  | 0.117170  | -3.784186 | -0.781800 |
| C  | 3.776524  | -2.522319 | -0.459575 |
| C  | 2.942186  | -0.326515 | 0.311454  |
| O  | 0.157370  | -1.770823 | 2.580072  |
| C  | -2.450608 | -2.327378 | 0.341641  |
| H  | -1.254871 | -2.438978 | -1.474888 |
| C  | 2.123980  | 1.852250  | 0.653800  |
| C  | -0.512268 | -0.732089 | 2.598037  |
| C  | 0.334159  | 1.286763  | -2.227520 |
| C  | -3.466715 | 1.674279  | -1.081637 |
| C  | -3.695338 | -0.244140 | 0.554186  |
| C  | 3.517247  | -3.785335 | -0.971826 |
| H  | 1.979899  | -5.210294 | -1.493566 |
| H  | 4.803723  | -2.160871 | -0.355442 |
| H  | 3.945428  | 0.033181  | 0.576561  |
| C  | -2.102811 | -3.699444 | 0.824735  |
| C  | -3.376093 | -1.539211 | 0.999972  |
| C  | 1.308748  | 2.478521  | 1.599831  |
| C  | 3.112186  | 2.577807  | -0.016632 |
| C  | -1.168409 | -0.242599 | 3.865241  |
| C  | 0.494726  | 2.243849  | -3.355681 |
| C  | -4.898068 | 1.697545  | -1.609733 |
| C  | -3.260500 | 2.750231  | -0.021226 |
| H  | -2.782084 | 1.895209  | -1.921192 |
| H  | -4.445793 | 0.331686  | 1.106536  |
| H  | 4.339131  | -4.442298 | -1.263694 |
| H  | -2.865207 | -4.086714 | 1.516964  |
| H  | -2.003477 | -4.415727 | -0.007710 |
| H  | -1.141821 | -3.682695 | 1.369381  |
| H  | -3.882705 | -1.939478 | 1.884961  |
| C  | 1.512784  | 3.821399  | 1.896282  |

**INT(F<sup>c</sup>-G<sup>c</sup>)**

CPCM (MeOH)  
wB97X-D3 SCF (DZ) = -1497.662320  
G (1 atm) = -1497.198606  
qh G-E (1 mol/L) = 0.479048  
qh G-E (24.56 mol/L) = 0.482071  
Lowest Frequency = 4.65

HF SCF energy (TZ) = -1488.773378  
HF SCF energy (QZ) = -1488.862386  
Correlation energy (DZ) = -5.354198  
Correlation energy (TZ) = -6.560526  
DLPNO-CCSD(T1)/CBS = -1496.154632

SMD (MeOH)

HF SCF energy (TZ) = -1488.791731  
HF SCF energy (QZ) = -1488.880537  
Correlation energy (DZ) = -5.347405  
Correlation energy (TZ) = -6.555210  
DLPNO-CCSD(T1)/CBS = -1496.168270

\* xyz 0 1

|    |           |           |           |
|----|-----------|-----------|-----------|
| Ru | 0.181081  | -0.244803 | -0.279117 |
| C  | 1.419321  | -2.117341 | -0.173804 |
| C  | 1.192287  | -3.406341 | -0.669392 |
| C  | 2.760612  | -1.685227 | -0.031544 |
| N  | 1.968794  | 0.494934  | 0.324494  |
| O  | -0.648775 | 0.109234  | 1.567706  |
| C  | 2.259322  | -4.221035 | -1.045397 |
| C  | 3.828145  | -2.516282 | -0.386860 |
| C  | 2.980518  | -0.308129 | 0.358292  |
| O  | -0.031232 | -1.822610 | 2.526060  |
| C  | 2.177721  | 1.885656  | 0.595809  |
| C  | -0.599542 | -0.722148 | 2.554315  |
| C  | 3.578495  | -3.785080 | -0.898925 |
| C  | 1.372770  | 2.534217  | 1.534364  |
| C  | 3.155276  | 2.589340  | -0.110169 |
| C  | -1.284662 | -0.230032 | 3.811817  |
| C  | 1.571811  | 3.889559  | 1.782364  |
| C  | 3.342337  | 3.948491  | 0.141796  |
| C  | 2.555303  | 4.600029  | 1.089785  |
| H  | 0.594137  | -1.740152 | 0.584582  |
| H  | 0.176813  | -3.791718 | -0.749199 |
| H  | 2.057328  | -5.219186 | -1.439974 |
| H  | 4.852036  | -2.149990 | -0.280613 |
| H  | 3.975247  | 0.051260  | 0.645539  |
| H  | 4.407799  | -4.434677 | -1.184433 |
| H  | 0.593854  | 1.966927  | 2.045395  |
| H  | 3.749805  | 2.077980  | -0.870331 |
| H  | -2.251556 | 0.229750  | 3.566958  |
| H  | -0.656307 | 0.543636  | 4.280059  |
| H  | -1.424083 | -1.052523 | 4.523638  |
| H  | 0.948302  | 4.397843  | 2.521029  |
| H  | 4.104261  | 4.498821  | -0.414167 |
| H  | 2.701634  | 5.664592  | 1.284113  |
| C  | -2.223152 | -0.484640 | -1.242347 |
| C  | -1.911028 | -1.795224 | -0.865856 |
| C  | -3.116417 | 0.302784  | -0.479428 |
| C  | -2.497403 | -2.375931 | 0.284721  |



|       |           |           |           |   |           |           |           |
|-------|-----------|-----------|-----------|---|-----------|-----------|-----------|
| H     | 0.519396  | 1.896291  | 2.081028  | C | -3.440105 | 1.725705  | -0.898072 |
| C     | 3.302322  | 3.925147  | 0.282605  | C | -3.691250 | -0.281968 | 0.638300  |
| H     | 3.713942  | 2.088822  | -0.788244 | C | -2.156952 | -3.777618 | 0.712171  |
| H     | -2.187943 | 0.116341  | 3.662578  | C | -3.387531 | -1.600558 | 1.012077  |
| H     | -0.595008 | 0.612332  | 4.259853  | C | -4.884022 | 1.846243  | -1.397817 |
| H     | -1.185296 | -1.033336 | 4.626187  | C | -3.155042 | 2.723928  | 0.229801  |
| H     | 1.138602  | 1.826068  | -4.138868 | H | -1.880557 | -0.111147 | -2.209676 |
| H     | 0.912929  | 3.189968  | -2.982671 | H | -1.322456 | -2.415356 | -1.545478 |
| H     | -0.495996 | 2.468312  | -3.781354 | H | -2.765375 | 1.968976  | -1.734343 |
| H     | -5.145850 | 2.685977  | -2.030831 | H | -4.398687 | 0.287006  | 1.247987  |
| H     | -5.618693 | 1.490001  | -0.799334 | H | -2.964193 | -4.214814 | 1.316356  |
| H     | -5.052754 | 0.941507  | -2.396628 | H | -1.977772 | -4.435078 | -0.151346 |
| H     | -3.477052 | 3.749029  | -0.435253 | H | -1.245381 | -3.766849 | 1.331130  |
| H     | -3.936341 | 2.598805  | 0.838408  | H | -3.868157 | -2.027518 | 1.896990  |
| H     | -2.224163 | 2.749340  | 0.352752  | H | -5.090553 | 2.870735  | -1.745612 |
| C     | 2.508537  | 4.548343  | 1.242446  | H | -5.602529 | 1.612444  | -0.594926 |
| H     | 0.883013  | 4.308280  | 2.645077  | H | -5.076257 | 1.155994  | -2.233693 |
| H     | 4.072770  | 4.491150  | -0.246675 | H | -3.328374 | 3.755474  | -0.114830 |
| H     | 2.658261  | 5.605393  | 1.475092  | H | -3.813034 | 2.548258  | 1.096360  |
| *     |           |           |           | H | -2.112428 | 2.645522  | 0.571589  |
| ----- |           |           |           |   |           |           |           |
|       |           |           |           | O | 0.779769  | 0.058136  | -2.323360 |
|       |           |           |           | O | -0.206312 | 1.638364  | -1.205147 |
|       |           |           |           | C | 0.358277  | 1.257810  | -2.280308 |
|       |           |           |           | C | 0.501466  | 2.189985  | -3.440325 |
|       |           |           |           | H | 1.157336  | 1.760928  | -4.205922 |
|       |           |           |           | H | 0.901697  | 3.150251  | -3.088144 |
|       |           |           |           | H | -0.493739 | 2.375273  | -3.870803 |
|       |           |           |           | * |           |           |           |
| ----- |           |           |           |   |           |           |           |

#### INT(F<sup>S</sup>-G<sup>S</sup>)

CPCM (MeOH)

M06 SCF (DZ) = -1223.433812  
 G (1 atm) = -1223.134402  
 qh-G (1 mol/L) = -1223.125622  
 qh-G (24.56 mol/L) = -1223.1226  
 Lowest Frequency = 34.18

HF SCF energy (TZ) = -1216.920976  
 HF SCF energy (QZ) = -1216.997087  
 Correlation energy (DZ) = -4.199038  
 Correlation energy (TZ) = -5.202047  
 DLPNO-CCSD(T1)/CBS = -1222.808160

\*xyz 0 1

|    |           |           |           |
|----|-----------|-----------|-----------|
| Ru | 0.392722  | 0.401068  | 0.359973  |
| C  | 1.880456  | -0.906460 | -0.429471 |
| O  | 1.774462  | 1.671640  | 1.491838  |
| C  | 3.252256  | -0.981231 | -0.127154 |
| C  | 1.239804  | -2.072834 | -0.942413 |
| H  | 1.595738  | 0.161166  | -0.898515 |
| O  | 1.969953  | 1.818474  | -2.029602 |
| N  | -0.765838 | -0.896328 | -0.675632 |
| O  | 0.071396  | 2.029376  | -0.849731 |
| O  | -1.094295 | 0.845711  | 1.833055  |
| O  | 0.227666  | -0.864686 | 2.089390  |
| C  | 1.324267  | 2.952416  | 1.945865  |
| H  | 2.118703  | 1.171048  | 2.247495  |
| C  | 3.944916  | -2.174000 | -0.292931 |
| H  | 3.771674  | -0.086324 | 0.229152  |
| C  | 1.959127  | -3.260591 | -1.130687 |
| C  | -0.176217 | -1.970299 | -1.131882 |
| C  | 0.937406  | 2.423444  | -1.733061 |
| C  | -2.178984 | -0.773143 | -0.767648 |
| C  | -0.752352 | -0.172256 | 2.515118  |
| H  | 2.158768  | 3.502462  | 2.404141  |

|   |           |           |           |
|---|-----------|-----------|-----------|
| H | 0.494324  | 2.850656  | 2.661678  |
| H | 0.969280  | 3.490943  | 1.058183  |
| C | 3.306527  | -3.313284 | -0.803835 |
| H | 5.007514  | -2.219360 | -0.039193 |
| H | 1.441848  | -4.146826 | -1.510551 |
| H | -0.752835 | -2.755352 | -1.638257 |
| C | 0.572950  | 3.734058  | -2.384099 |
| C | -2.727360 | 0.443089  | -1.185075 |
| C | -3.013264 | -1.836615 | -0.411320 |
| C | -1.496912 | -0.560668 | 3.743415  |
| H | 3.868966  | -4.239496 | -0.940771 |
| H | -0.455660 | 3.697551  | -2.772144 |
| H | 0.602994  | 4.537260  | -1.630903 |
| H | 1.271562  | 3.973289  | -3.195470 |
| C | -4.108078 | 0.575124  | -1.280698 |
| H | -2.050897 | 1.267373  | -1.426911 |
| C | -4.395648 | -1.689847 | -0.502535 |
| H | -2.577272 | -2.768826 | -0.041373 |
| H | -2.344320 | -1.201147 | 3.450936  |
| H | -1.902355 | 0.326770  | 4.246128  |
| H | -0.853942 | -1.132819 | 4.424088  |
| C | -4.946195 | -0.488583 | -0.942717 |
| H | -4.536323 | 1.521753  | -1.619771 |
| H | -5.045489 | -2.520994 | -0.217710 |
| H | -6.030808 | -0.375880 | -1.012438 |

\*

-----

**INT(F<sup>25</sup>-G<sup>25</sup>)**

CPCM (MeOH)

M06 SCF (DZ) = -1339.115506

G (1 atm) = -1338.763323

qh-G (1 mol/L) = -1338.754905

qh-G (24.56 mol/L) = -1338.751882

Lowest Frequency = 31.25

HF SCF energy (TZ) = -1332.020789

HF SCF energy (QZ) = -1332.105141

Correlation energy (DZ) = -4.582412

Correlation energy (TZ) = -5.678758

DLPNO-CCSD(T1)/CBS = -1338.449949

\*xyz 0 1

|    |           |           |           |
|----|-----------|-----------|-----------|
| Ru | -0.361498 | 0.376705  | 0.066359  |
| C  | -1.569016 | -1.413823 | 0.390610  |
| O  | 0.713976  | 2.014667  | -0.858741 |
| C  | -0.926865 | -2.520834 | -0.226201 |
| C  | -2.928961 | -1.514267 | 0.709191  |
| H  | -0.935413 | -0.817487 | 1.198961  |
| O  | -1.355846 | 0.481886  | -1.907899 |
| O  | 0.540005  | -1.237450 | 2.699618  |
| N  | 0.905392  | -1.101055 | -0.508863 |
| O  | 0.748464  | 0.779437  | 1.732941  |
| O  | -1.781044 | 1.833084  | 0.749165  |
| C  | 1.749124  | 2.716598  | -0.176745 |
| H  | -0.029443 | 2.635677  | -1.065524 |
| C  | -1.649388 | -3.674679 | -0.543154 |
| C  | 0.456224  | -2.319386 | -0.576148 |
| C  | -3.643694 | -2.660588 | 0.372399  |
| H  | -3.422954 | -0.683394 | 1.221137  |
| C  | -2.557353 | -0.177308 | -2.289316 |
| H  | -1.548200 | 1.454787  | -1.884739 |
| C  | 1.017252  | -0.102086 | 2.643533  |
| C  | 2.283252  | -0.843571 | -0.752489 |
| C  | -2.154837 | 2.802599  | 0.019334  |
| H  | 1.371628  | 3.202670  | 0.736781  |

|   |           |           |           |
|---|-----------|-----------|-----------|
| H | 2.524401  | 1.990111  | 0.101886  |
| H | 2.181533  | 3.470502  | -0.852633 |
| C | -3.007478 | -3.740858 | -0.248348 |
| H | -1.144765 | -4.510469 | -1.036538 |
| H | 1.108479  | -3.144133 | -0.892966 |
| H | -4.709214 | -2.722745 | 0.608162  |
| H | -2.830242 | 0.118488  | -3.314224 |
| H | -3.387665 | 0.066035  | -1.603728 |
| H | -2.379903 | -1.261139 | -2.266363 |
| C | 2.025261  | 0.381991  | 3.657360  |
| C | 3.230367  | -1.224846 | 0.199140  |
| C | 2.668642  | -0.164599 | -1.908881 |
| C | -3.175428 | 3.745181  | 0.590333  |
| O | -1.729757 | 3.022178  | -1.152639 |
| H | -3.577142 | -4.638635 | -0.498643 |
| H | 3.013468  | 0.446838  | 3.172957  |
| H | 1.772056  | 1.391993  | 4.010221  |
| H | 2.087855  | -0.310931 | 4.506006  |
| C | 4.573530  | -0.919628 | -0.010644 |
| H | 2.893778  | -1.738811 | 1.105080  |
| C | 4.014117  | 0.124786  | -2.114551 |
| H | 1.906103  | 0.128763  | -2.634702 |
| H | -4.080857 | 3.713228  | -0.034793 |
| H | -2.789639 | 4.773971  | 0.536714  |
| H | -3.434206 | 3.495132  | 1.626313  |
| C | 4.967326  | -0.245542 | -1.165441 |
| H | 5.316870  | -1.212225 | 0.735192  |
| H | 4.321269  | 0.647029  | -3.024105 |
| H | 6.021522  | -0.008161 | -1.327641 |

\*

-----

**MeOH (S)**

CPCM (MeOH)  
M06 SCF (DZ) = -115.655157  
G (1 atm) = -115.627122  
qh-G (1 mol/L) = -115.624105  
qh-G (24.56 mol/L) = -115.621083  
Lowest Frequency = 301.28

HF SCF energy (TZ) = -115.095802  
HF SCF energy (QZ) = -115.105553  
Correlation energy (DZ) = -0.370631  
Correlation energy (TZ) = -0.461212  
DLPNO-CCSD(T1)/CBS = -115.622632

PBE0+D3BJ (ATZ) = -115.645862  
M06-2X (ATZ) = -115.725166  
wB97M-V (ATZ) = -115.722702  
B2GP-PLYP (ATZ) = -115.670180  
B2K-PLYP (ATZ) = -115.656086  
PWPB95 (ATZ) = -115.696735  
PWPB95+D3BJ (ATZ) = -115.697228  
PWPB95+D4 (ATZ) = -115.698248

\*xyz 0 1

|   |           |           |           |
|---|-----------|-----------|-----------|
| C | 0.653221  | -0.019191 | 0.000011  |
| O | -0.744466 | 0.122777  | -0.000067 |
| H | 1.036152  | -0.547162 | 0.894098  |
| H | -1.126959 | -0.763032 | 0.000413  |
| H | 1.036192  | -0.547725 | -0.893982 |
| H | 1.091015  | 0.990848  | -0.000058 |

\*

**MeOH (S)**

CPCM (MeOH)  
wB97X-D3 SCF (DZ) = -115.696843  
G (1 atm) = -115.668250  
qh G-E (1 mol/L) = 0.031612  
qh G-E (24.56 mol/L) = 0.034634  
Lowest Frequency = 320.3

HF SCF energy (TZ) = -115.096048  
HF SCF energy (QZ) = -115.105628  
Correlation energy (DZ) = -0.370772  
Correlation energy (TZ) = -0.461388  
DLPNO-CCSD(T1)/CBS = -115.622853

PBE0+D3BJ (ATZ) = -115.646025  
M06-2X (ATZ) = -115.724815  
wB97M-V (ATZ) = -115.722228  
B2GP-PLYP (ATZ) = -115.669766  
B2K-PLYP (ATZ) = -115.655664  
PWPB95 (ATZ) = -115.696297  
PWPB95+D3BJ (ATZ) = -115.696790  
PWPB95+D4 (ATZ) = -115.697809

SMD (MeOH)

HF SCF energy (TZ) = -115.097473  
HF SCF energy (QZ) = -115.107020  
Correlation energy (DZ) = -0.370203  
Correlation energy (TZ) = -0.460915  
DLPNO-CCSD(T1)/CBS = -115.623819

\*xyz 0 1

|   |           |           |           |
|---|-----------|-----------|-----------|
| C | 0.659651  | -0.018475 | 0.000019  |
| O | -0.747546 | 0.123136  | -0.000014 |
| H | 1.033399  | -0.547838 | 0.895482  |

|   |           |           |           |
|---|-----------|-----------|-----------|
| H | 1.033400  | -0.548219 | -0.895220 |
| H | 1.092185  | 0.992663  | -0.000200 |
| H | -1.125934 | -0.764751 | 0.000348  |

\*

**MeOH•Cl<sup>-</sup> (S•Cl<sup>-</sup>)**

CPCM (MeOH)  
M06 SCF (DZ) = -576.022543  
G (1 atm) = -575.998889  
qh-G (1 mol/L) = -575.995788  
qh-G (24.56 mol/L) = -575.992766  
Lowest Frequency = 123.41

HF SCF energy (TZ) = -574.773994  
HF SCF energy (QZ) = -574.788872  
Correlation energy (DZ) = -0.526507  
Correlation energy (TZ) = -0.691785  
DLPNO-CCSD(T1)/CBS = -575.581719

PBE0+D3BJ (ATZ) = -575.900652  
M06-2X (ATZ) = -576.118390  
wB97M-V (ATZ) = -576.106749  
B2GP-PLYP (ATZ) = -575.904167  
B2K-PLYP (ATZ) = -575.859279  
PWPB95 (ATZ) = -576.052807  
PWPB95+D3BJ (ATZ) = -576.053880  
PWPB95+D4 (ATZ) = -576.055569

\*xyz -1 1

|    |           |           |           |
|----|-----------|-----------|-----------|
| O  | 2.125189  | 0.647710  | -0.398989 |
| C  | 2.514711  | -0.468207 | 0.341299  |
| H  | 1.156441  | 0.789036  | -0.208020 |
| H  | 2.742945  | -0.236145 | 1.406519  |
| H  | 1.739404  | -1.258628 | 0.336839  |
| H  | 3.439412  | -0.896000 | -0.089228 |
| Cl | -0.722888 | 1.062816  | 0.162644  |

\*

**MeOH•Cl<sup>-</sup> (S•Cl<sup>-</sup>)**

CPCM (MeOH)  
wB97X-D3 SCF (DZ) = -576.076648  
G (1 atm) = -576.054588  
qh G-E (1 mol/L) = 0.027507  
qh G-E (24.56 mol/L) = 0.030529  
Lowest Frequency = 94.71

HF SCF energy (TZ) = -574.778760  
HF SCF energy (QZ) = -574.793532  
Correlation energy (DZ) = -0.524328  
Correlation energy (TZ) = -0.689393  
DLPNO-CCSD(T1)/CBS = -575.583830

PBE0+D3BJ (ATZ) = -575.902277  
M06-2X (ATZ) = -576.118865  
wB97M-V (ATZ) = -576.107789  
B2GP-PLYP (ATZ) = -575.904875  
B2K-PLYP (ATZ) = -575.859964  
PWPB95 (ATZ) = -576.053633  
PWPB95+D3BJ (ATZ) = -576.054692  
PWPB95+D4 (ATZ) = -576.057363

SMD (MeOH)

HF SCF energy (TZ) = -574.773839  
HF SCF energy (QZ) = -574.789009  
Correlation energy (DZ) = -0.523968  
Correlation energy (TZ) = -0.689157  
DLPNO-CCSD(T1)/CBS = -575.579262

\*xyz -1 1

|    |           |           |           |
|----|-----------|-----------|-----------|
| O  | 2.143961  | 0.543344  | -0.561653 |
| C  | 2.499127  | -0.494268 | 0.319755  |
| H  | 1.230999  | 0.807611  | -0.314301 |
| H  | 2.462259  | -0.186524 | 1.383017  |
| H  | 1.855363  | -1.389313 | 0.211996  |
| H  | 3.533797  | -0.798934 | 0.096287  |
| Cl | -0.730292 | 1.158666  | 0.415963  |

\*

**(MeOH)<sub>2</sub>•Cl<sup>-</sup> (S<sub>2</sub>•Cl<sup>-</sup>)**

CPCM (MeOH)  
wB97X-D3 SCF (DZ) = -691.789076  
G (1 atm) = -691.718411  
qh G-E (1 mol/L) = 0.076454  
qh G-E (24.56 mol/L) = 0.079477  
Lowest Frequency = 45.29

SMD (MeOH)

HF SCF energy (TZ) = -689.872486  
HF SCF energy (QZ) = -689.895556  
Correlation energy (DZ) = -0.902034  
Correlation energy (TZ) = -1.159312  
DLPNO-CCSD(T1)/CBS = -691.212156

\*xyz -1 1

|    |           |          |           |
|----|-----------|----------|-----------|
| Cl | -3.498057 | 0.318846 | 0.065173  |
| H  | -3.494261 | 0.879326 | 2.158486  |
| H  | -2.864562 | 2.363582 | -0.167700 |

|   |           |          |           |
|---|-----------|----------|-----------|
| O | -3.539663 | 1.289549 | 3.045528  |
| O | -2.727240 | 3.323774 | -0.311309 |
| C | -4.049690 | 2.589566 | 2.842631  |
| C | -3.900703 | 3.795360 | -0.936175 |
| H | -5.137591 | 2.591716 | 2.628987  |
| H | -3.543367 | 3.109239 | 2.009775  |
| H | -3.892005 | 3.172368 | 3.764039  |
| H | -4.789561 | 3.721401 | -0.280444 |
| H | -4.126351 | 3.253969 | -1.873950 |
| H | -3.753953 | 4.857529 | -1.185362 |

\*

-----

**(MeOH)<sub>3</sub>•Cl<sup>-</sup> (S<sub>3</sub>•Cl<sup>-</sup>)**

CPCM (MeOH)

|                        |             |
|------------------------|-------------|
| wB97X-D3 SCF (DZ) =    | -807.500180 |
| G (1 atm) =            | -807.381629 |
| qh G-E (1 mol/L) =     | 0.125616    |
| qh G-E (24.56 mol/L) = | 0.128638    |
| Lowest Frequency =     | 14.56       |

SMD (MeOH)

|                           |             |
|---------------------------|-------------|
| HF SCF energy (TZ) =      | -804.970120 |
| HF SCF energy (QZ) =      | -805.001057 |
| Correlation energy (DZ) = | -1.280854   |
| Correlation energy (TZ) = | -1.629884   |
| DLPNO-CCSD(T1)/CBS =      | -806.844213 |

\*xyz -1 1

|    |           |           |           |
|----|-----------|-----------|-----------|
| Cl | -3.094132 | 1.535837  | 1.140596  |
| H  | -2.786644 | 2.687689  | -0.704062 |
| H  | -4.980047 | 1.028716  | 0.147916  |
| H  | -4.425003 | 0.771014  | 2.713814  |
| O  | -2.825111 | 3.159084  | -1.557654 |
| O  | -5.899691 | 0.902880  | -0.161021 |
| O  | -5.028100 | 0.274222  | 3.299669  |
| C  | -4.177175 | 3.521586  | -1.740552 |
| C  | -6.702003 | 1.729205  | 0.661323  |
| C  | -5.212468 | -0.988316 | 2.691031  |
| H  | -4.499025 | 4.326080  | -1.049888 |
| H  | -4.862126 | 2.665775  | -1.602737 |
| H  | -4.295171 | 3.898345  | -2.768520 |
| H  | -7.757120 | 1.517287  | 0.431442  |
| H  | -6.527835 | 1.530136  | 1.732931  |
| H  | -6.522922 | 2.805083  | 0.473777  |
| H  | -4.279806 | -1.583446 | 2.666520  |
| H  | -5.590346 | -0.897365 | 1.656908  |
| H  | -5.953801 | -1.546420 | 3.282991  |

\*

**Ru(OAc)<sub>2</sub>•S**

CPCM (MeOH)

|                      |             |
|----------------------|-------------|
| M06 SCF (DZ) =       | -667.042706 |
| G (1 atm) =          | -666.930958 |
| qh-G (1 mol/L) =     | -666.924850 |
| qh-G (24.56 mol/L) = | -666.921827 |
| Lowest Frequency =   | 21.24       |

|                           |             |
|---------------------------|-------------|
| HF SCF energy (TZ) =      | -663.619175 |
| HF SCF energy (QZ) =      | -663.662173 |
| Correlation energy (DZ) = | -2.118291   |
| Correlation energy (TZ) = | -2.720782   |
| DLPNO-CCSD(T1)/CBS =      | -666.747968 |

\*xyz 0 1

|    |           |           |           |
|----|-----------|-----------|-----------|
| Ru | 0.108393  | 0.223111  | -0.420642 |
| O  | -1.230598 | 1.910510  | -0.374637 |
| O  | -1.723715 | -0.755015 | -1.001329 |
| C  | -1.378881 | 2.564403  | 0.888575  |
| H  | -2.104532 | 1.624782  | -0.689017 |
| O  | 1.995744  | 0.811607  | 0.368680  |
| O  | 1.666717  | -1.221643 | -0.316127 |
| O  | -0.964112 | -0.797369 | 1.023394  |
| C  | -1.861462 | -1.162045 | 0.192207  |
| H  | -2.050942 | 3.429856  | 0.789174  |
| H  | -1.763683 | 1.869850  | 1.651725  |
| H  | -0.379528 | 2.909772  | 1.183775  |
| C  | 2.458417  | -0.359666 | 0.175774  |
| C  | -2.985033 | -2.042875 | 0.605896  |
| C  | 3.874428  | -0.688117 | 0.497873  |
| H  | -3.897621 | -1.778609 | 0.055612  |
| H  | -2.730846 | -3.084408 | 0.353639  |
| H  | -3.153480 | -1.979380 | 1.688066  |
| H  | 4.035002  | -1.772961 | 0.495468  |
| H  | 4.532126  | -0.227839 | -0.255664 |
| H  | 4.147110  | -0.262848 | 1.473669  |

\*

-----

**Ru(OAc)<sub>2</sub>•2S**

CPCM (MeOH)

M06 SCF (DZ) = -782.739087

G (1 atm) = -782.576350

qh-G (1 mol/L) = -782.570173

qh-G (24.56 mol/L) = -782.567150

Lowest Frequency = 38.40

HF SCF energy (TZ) = -778.745931

HF SCF energy (QZ) = -778.797001

Correlation energy (DZ) = -2.504126

Correlation energy (TZ) = -3.197845

DLPNO-CCSD(T1)/CBS = -782.415599

\*xyz 0 1

|    |           |           |           |
|----|-----------|-----------|-----------|
| C  | 2.512883  | -0.165780 | -0.017741 |
| C  | 4.002058  | -0.244416 | -0.011470 |
| O  | 1.836249  | -0.439263 | 1.024315  |
| H  | 4.334381  | -1.115295 | 0.569682  |
| H  | 4.408752  | 0.655098  | 0.476674  |
| H  | 4.395145  | -0.294341 | -1.034582 |
| O  | 1.869169  | 0.196598  | -1.048335 |
| O  | 0.177197  | 2.007655  | 0.725280  |
| C  | 0.365927  | 3.020945  | -0.267699 |
| H  | 0.913125  | 2.045599  | 1.356734  |
| H  | 0.421888  | 4.010222  | 0.210591  |
| H  | 1.274288  | 2.829395  | -0.859478 |
| H  | -0.512687 | 2.979495  | -0.923754 |
| O  | -0.177198 | -2.007615 | -0.725281 |
| C  | -0.366044 | -3.020900 | 0.267686  |
| H  | -0.913173 | -2.045416 | -1.356691 |
| H  | -0.422317 | -4.010143 | -0.210637 |
| H  | -1.274283 | -2.829145 | 0.859586  |
| H  | 0.512669  | -2.979696 | 0.923622  |
| C  | -2.512864 | 0.165740  | 0.017725  |
| C  | -4.002048 | 0.244272  | 0.011369  |
| O  | -1.836206 | 0.439235  | -1.024314 |
| O  | -1.869176 | -0.196579 | 1.048353  |
| H  | -4.334371 | 1.115478  | -0.569295 |
| H  | -4.408637 | -0.654958 | -0.477382 |
| H  | -4.395230 | 0.293564  | 1.034474  |
| Ru | 0.000016  | 0.000016  | 0.000025  |

\*

-----  
**Ru(OAc)<sub>2</sub>•3S<sup>fac</sup>**

CPCM (MeOH)  
M06 SCF (DZ) = -898.417189  
G (1 atm) = -898.205683  
qh-G (1 mol/L) = -898.198914  
qh-G (24.56 mol/L) = -898.195892  
Lowest Frequency = 46.63  
  
HF SCF energy (TZ) = -893.845678  
HF SCF energy (QZ) = -893.905270  
Correlation energy (DZ) = -2.886726  
Correlation energy (TZ) = -3.672542  
DLPNO-CCSD(T1)/CBS = -898.054948

\*xyz 0 1

|    |           |           |           |
|----|-----------|-----------|-----------|
| Ru | 0.267344  | -0.046203 | 0.136592  |
| O  | -1.068062 | 0.079383  | 1.876086  |
| O  | 0.044846  | 2.044330  | -0.221893 |
| C  | -1.843205 | -1.070332 | 2.227006  |
| H  | -0.559736 | 0.353910  | 2.652390  |
| O  | 0.550786  | -2.156859 | 0.495004  |
| O  | -1.570697 | -0.502615 | -0.796368 |
| O  | 2.315870  | 0.250207  | 0.753838  |
| O  | 1.802281  | -0.089017 | -1.330502 |
| C  | 0.126579  | 2.893681  | 0.909462  |
| H  | -0.916880 | 2.017857  | -0.548992 |
| H  | -1.199165 | -1.902403 | 2.551037  |
| H  | -2.557904 | -0.812228 | 3.022811  |
| H  | -2.385626 | -1.367322 | 1.320622  |
| C  | 0.279825  | -3.034566 | -0.601580 |
| H  | 1.468167  | -2.288729 | 0.781257  |
| C  | -2.479359 | 0.356688  | -1.054347 |
| C  | 2.692639  | 0.152359  | -0.455857 |
| H  | 0.033996  | 3.948824  | 0.602188  |
| H  | -0.664694 | 2.666461  | 1.645412  |
| H  | 1.109573  | 2.747060  | 1.380115  |
| H  | 0.420426  | -4.080598 | -0.290571 |
| H  | 0.929487  | -2.802446 | -1.460329 |
| H  | -0.766659 | -2.864200 | -0.882439 |
| C  | -3.802925 | -0.220287 | -1.487146 |
| O  | -2.358230 | 1.599210  | -0.956490 |
| C  | 4.120901  | 0.342264  | -0.839266 |
| H  | -4.325020 | -0.616327 | -0.600471 |
| H  | -3.655450 | -1.061576 | -2.178761 |
| H  | -4.435721 | 0.547791  | -1.949960 |
| H  | 4.316956  | 1.418934  | -0.963945 |
| H  | 4.784326  | -0.028918 | -0.046801 |
| H  | 4.339731  | -0.159128 | -1.790654 |

\*

-----  
**Ru(OAc)<sub>2</sub>•3S<sup>mer</sup>**

CPCM (MeOH)  
M06 SCF (DZ) = -898.422053  
G (1 atm) = -898.211115  
qh-G (1 mol/L) = -898.203784  
qh-G (24.56 mol/L) = -898.200761  
Lowest Frequency = 41.35  
  
HF SCF energy (TZ) = -893.847853  
HF SCF energy (QZ) = -893.907193  
Correlation energy (DZ) = -2.886983  
Correlation energy (TZ) = -3.673739

DLPNO-CCSD(T1)/CBS = -898.058541

\*xyz 0 1

|    |           |           |           |
|----|-----------|-----------|-----------|
| Ru | -0.293835 | -0.149872 | -0.028292 |
| O  | 0.905984  | -1.297744 | -1.431880 |
| O  | 0.812250  | -1.419271 | 1.344924  |
| C  | 0.796755  | -0.858324 | -2.778356 |
| H  | 1.808307  | -1.083139 | -1.086872 |
| O  | -1.987304 | -1.502976 | -0.061237 |
| O  | 1.258294  | 1.265821  | 0.042630  |
| O  | -1.485592 | 1.275000  | -1.085240 |
| O  | -1.585331 | 1.132712  | 1.080665  |
| C  | 0.599424  | -1.107792 | 2.714110  |
| H  | 1.733966  | -1.165564 | 1.085994  |
| H  | 1.026947  | 0.217574  | -2.867883 |
| H  | 1.470062  | -1.437885 | -3.429892 |
| H  | -0.243260 | -1.024975 | -3.094595 |
| C  | -1.712651 | -2.903044 | -0.103501 |
| H  | -2.517925 | -1.308002 | 0.727493  |
| C  | 2.479479  | 0.916713  | 0.085069  |
| C  | -1.966944 | 1.702841  | 0.007505  |
| H  | 1.240519  | -1.732140 | 3.356714  |
| H  | 0.794739  | -0.040313 | 2.917037  |
| H  | -0.455195 | -1.323793 | 2.941023  |
| H  | -2.652858 | -3.474040 | -0.122688 |
| H  | -1.095495 | -3.214814 | 0.754310  |
| H  | -1.154420 | -3.085584 | -1.031042 |
| C  | 3.505190  | 2.012888  | 0.144458  |
| O  | 2.883917  | -0.281882 | 0.078487  |
| C  | -2.924148 | 2.844819  | 0.044628  |
| H  | 3.046808  | 3.009323  | 0.148554  |
| H  | 4.183238  | 1.918990  | -0.717333 |
| H  | 4.121189  | 1.882217  | 1.047025  |
| H  | -2.370381 | 3.769718  | 0.270060  |
| H  | -3.422757 | 2.967360  | -0.925137 |
| H  | -3.665106 | 2.697537  | 0.841799  |

\*

-----  
**TS(B<sup>0</sup>-B<sup>0+</sup>)**

CPCM (MeOH)  
M06 SCF (DZ) = -2808.599081  
G (1 atm) = -2808.232037  
qh-G (1 mol/L) = -2808.223390  
qh-G (24.56 mol/L) = -2808.220368  
Lowest Frequency = -106.34

HF SCF energy (TZ) = -2799.828397  
HF SCF energy (QZ) = -2799.893416  
Correlation energy (DZ) = -4.600539  
Correlation energy (TZ) = -5.818928  
DLPNO-CCSD(T1)/CBS = -2806.443883

\*xyz 0 1

|    |           |           |           |
|----|-----------|-----------|-----------|
| Ru | -1.746702 | 0.560477  | -0.002999 |
| C  | -3.702033 | 0.659064  | -0.900921 |
| C  | -3.250324 | 1.977948  | -0.604241 |
| C  | -3.723866 | -0.348071 | 0.094710  |
| H  | -3.913894 | 0.399627  | -1.940508 |
| C  | -3.294118 | 0.013133  | 1.413651  |
| C  | -2.855566 | 1.316638  | 1.713128  |
| C  | -2.820681 | 2.327552  | 0.701093  |
| Cl | -0.526055 | -1.616661 | 0.412452  |
| Cl | 0.465446  | 1.471802  | 0.807578  |
| Cl | -0.661782 | 0.503180  | -2.182525 |
| H  | -3.135972 | 2.701360  | -1.415346 |

**TS(B<sup>0</sup>-B<sup>0+</sup>)**

CPCM (MeOH)  
wB97X-D3 SCF (DZ) = -2809.165497  
G (1 atm) = -2808.786157  
qh G-E (1 mol/L) = 0.391384  
qh G-E (24.56 mol/L) = 0.394407  
Lowest Frequency = -103.84

HF SCF energy (TZ) = -2567.575269  
HF SCF energy (QZ) = -2567.651747  
Correlation energy (DZ) = -5.142843  
Correlation energy (TZ) = -6.460928  
DLPNO-CCSD(T1)/CBS = -2574.905922

\*xyz 0 1

|    |           |           |           |
|----|-----------|-----------|-----------|
| Ru | -1.740246 | 0.584335  | -0.051503 |
| Cl | -0.641227 | 0.677263  | -2.222693 |
| C  | -3.284102 | 1.945948  | -0.676061 |
| C  | -2.818033 | 2.366267  | 0.590043  |
| C  | -3.718701 | 0.604909  | -0.898189 |
| C  | -2.294217 | 3.755368  | 0.802916  |
| C  | -2.804386 | 1.400132  | 1.649550  |
| C  | -3.698127 | -0.348804 | 0.144897  |
| C  | -3.236409 | 0.079743  | 1.433526  |
| C  | -4.108438 | -1.793680 | -0.053933 |
| C  | -3.914536 | -2.304941 | -1.480012 |
| C  | -5.565549 | -1.939425 | 0.406807  |



|    |           |           |           |
|----|-----------|-----------|-----------|
| C  | -4.124462 | -1.774006 | -0.185968 |
| H  | -3.198868 | -0.769917 | 2.172016  |
| H  | -2.429368 | 1.529675  | 2.696755  |
| C  | -2.265280 | 3.680390  | 0.990083  |
| Ru | 1.595639  | -0.512986 | -0.044044 |
| C  | -3.922456 | -2.199206 | -1.630275 |
| C  | -5.578443 | -1.954914 | 0.248430  |
| H  | -3.488114 | -2.408788 | 0.459217  |
| H  | -1.806211 | 4.122057  | 0.093997  |
| H  | -3.080991 | 4.345949  | 1.316397  |
| H  | -1.519023 | 3.644264  | 1.796325  |
| C  | 2.844048  | -0.022923 | -1.716170 |
| C  | 2.425211  | -1.380515 | -1.817101 |
| C  | 3.659910  | -0.445583 | 0.524959  |
| C  | 3.243504  | -1.802290 | 0.424570  |
| C  | 2.643142  | -2.303923 | -0.761135 |
| Cl | 2.272582  | -1.082976 | 3.489473  |
| H  | -4.618735 | -1.677058 | -2.308358 |
| H  | -2.892783 | -2.009569 | -1.974814 |
| H  | -4.123620 | -3.276415 | -1.731807 |
| H  | -5.725434 | -1.696275 | 1.309056  |
| H  | -5.891238 | -3.000670 | 0.104941  |
| H  | -6.243935 | -1.313789 | -0.354859 |
| C  | 3.495683  | 0.465216  | -0.552530 |
| H  | 2.548571  | 0.668398  | -2.508449 |
| H  | 1.824522  | -1.683640 | -2.679178 |
| H  | 3.985725  | -0.084672 | 1.505300  |
| H  | 3.265024  | -2.409516 | 1.333645  |
| C  | 2.115289  | -3.696496 | -0.829323 |
| C  | 3.900724  | 1.906828  | -0.372097 |
| H  | 1.818833  | -4.055855 | 0.166884  |
| H  | 2.898843  | -4.370068 | -1.211851 |
| H  | 1.251562  | -3.763281 | -1.506274 |
| C  | 5.420940  | 1.995196  | -0.501547 |
| C  | 3.216382  | 2.869125  | -1.327785 |
| H  | 3.623506  | 2.177799  | 0.664821  |
| H  | 5.757352  | 3.029743  | -0.332908 |
| H  | 5.934312  | 1.345454  | 0.224634  |
| H  | 5.739826  | 1.694376  | -1.514264 |
| H  | 3.488259  | 3.903675  | -1.069047 |
| H  | 2.118433  | 2.786623  | -1.285380 |
| H  | 3.541351  | 2.701062  | -2.368849 |

\*

|    |           |           |           |
|----|-----------|-----------|-----------|
| H  | -3.215241 | 2.628468  | -1.524214 |
| H  | -3.974844 | 0.300391  | -1.912546 |
| H  | -1.914133 | 4.180821  | -0.134862 |
| H  | -3.114830 | 4.393733  | 1.164193  |
| H  | -1.495039 | 3.767035  | 1.555335  |
| H  | -2.356517 | 1.664921  | 2.608903  |
| H  | -3.117941 | -0.656906 | 2.230213  |
| H  | -3.474428 | -2.394248 | 0.618934  |
| H  | -2.881126 | -2.154608 | -1.827604 |
| H  | -4.597041 | -1.809260 | -2.188210 |
| H  | -4.132554 | -3.382097 | -1.515813 |
| H  | -5.693991 | -1.611340 | 1.449257  |
| H  | -6.235094 | -1.337067 | -0.227931 |
| H  | -5.879287 | -2.991289 | 0.337742  |
| Cl | 0.468596  | 1.392266  | 0.832025  |
| Ru | 1.583090  | -0.525649 | -0.147346 |
| Cl | -0.547702 | -1.620166 | 0.203902  |
| C  | 2.495895  | -1.337555 | -1.903364 |
| C  | 2.646177  | -2.295822 | -0.870105 |
| C  | 2.914506  | 0.012850  | -1.730628 |
| C  | 2.133192  | -3.695871 | -1.022346 |
| C  | 3.182086  | -1.838945 | 0.364018  |
| C  | 3.501889  | 0.458130  | -0.518409 |
| C  | 3.601186  | -0.490972 | 0.534654  |
| C  | 3.912883  | 1.897230  | -0.276371 |
| C  | 3.234657  | 2.903741  | -1.203281 |
| C  | 5.441924  | 1.983527  | -0.381745 |
| H  | 1.950229  | -1.606570 | -2.809506 |
| H  | 2.673052  | 0.729598  | -2.515413 |
| H  | 1.773167  | -4.089146 | -0.062649 |
| H  | 2.954066  | -4.340326 | -1.371278 |
| H  | 1.321242  | -3.741215 | -1.759530 |
| H  | 3.160222  | -2.486172 | 1.240902  |
| H  | 3.892193  | -0.164119 | 1.534110  |
| H  | 3.625310  | 2.130640  | 0.762516  |
| H  | 2.138592  | 2.811797  | -1.175864 |
| H  | 3.570004  | 2.785233  | -2.245922 |
| H  | 3.497462  | 3.923865  | -0.887956 |
| H  | 5.935585  | 1.302932  | 0.327952  |
| H  | 5.775948  | 1.721940  | -1.398624 |
| H  | 5.775867  | 3.008368  | -0.162862 |
| Cl | 1.849383  | -1.318709 | 3.397936  |

\*

-----

**TS(B<sup>0</sup>-B<sup>0\*</sup>)**

CPCM (MeOH)

M06 SCF (DZ) = -2576.747206  
 G (1 atm) = -2576.337780  
 qh-G (1 mol/L) = -2576.327154  
 qh-G (24.56 mol/L) = -2576.324132  
 Lowest Frequency = -125.04

HF SCF energy (TZ) = -2567.574016  
 HF SCF energy (QZ) = -2567.652082  
 Correlation energy (DZ) = -5.139105  
 Correlation energy (TZ) = -6.456080  
 DLPNO-CCSD(T1)/CBS = -2574.901240

\*xyz 0 1

|    |           |           |           |
|----|-----------|-----------|-----------|
| Ru | -1.410521 | 0.116718  | -0.590350 |
| Cl | 0.598042  | 1.534505  | -0.534839 |
| Cl | -0.346770 | -0.979881 | 1.341313  |
| Ru | 1.874126  | -0.459759 | 0.295634  |
| O  | -1.761066 | 2.001702  | 1.778180  |
| Cl | 0.876161  | -1.538611 | -1.661378 |

-----

**TS(B<sup>0</sup>-B<sup>0\*</sup>)**

CPCM (MeOH)

wB97X-D3 SCF (DZ) = -2577.369277  
 G (1 atm) = -2576.941424  
 qh G-E (1 mol/L) = 0.439411  
 qh G-E (24.56 mol/L) = 0.442433  
 Lowest Frequency = -117.51

HF SCF energy (TZ) = -2799.832043  
 HF SCF energy (QZ) = -2799.896617  
 Correlation energy (DZ) = -4.599967  
 Correlation energy (TZ) = -5.818478  
 DLPNO-CCSD(T1)/CBS = -2806.446572

\*xyz 0 1

|    |           |           |           |
|----|-----------|-----------|-----------|
| Ru | -1.460432 | 0.259261  | -0.752143 |
| Cl | 0.506070  | 1.674991  | -0.621843 |
| Cl | -0.447423 | -0.909663 | 1.120328  |
| C  | -2.117397 | -0.148347 | -2.735575 |
| C  | -2.343339 | 1.232663  | -2.489480 |
| C  | -2.627521 | -1.154080 | -1.865080 |

|   |           |           |           |
|---|-----------|-----------|-----------|
| C | -2.785227 | 2.526666  | 2.295207  |
| C | -2.572047 | 3.201809  | 3.651605  |
| O | -3.946707 | 2.534879  | 1.816717  |
| H | -2.353551 | 2.433500  | 4.412126  |
| H | -1.694587 | 3.866821  | 3.616624  |
| H | -3.456540 | 3.771629  | 3.972077  |
| C | -2.571309 | -1.198609 | -1.822366 |
| C | -3.254262 | -1.059380 | -0.585602 |
| C | -2.176750 | -0.060398 | -2.583147 |
| H | -2.230825 | -2.183215 | -2.150817 |
| C | -3.636133 | -2.230951 | 0.284106  |
| C | -3.497286 | 0.264040  | -0.123869 |
| C | -2.450667 | 1.258052  | -2.136075 |
| H | -1.550428 | -0.207901 | -3.467421 |
| C | -2.859286 | -3.503309 | -0.007752 |
| C | -5.139551 | -2.462980 | 0.139209  |
| H | -3.431169 | -1.921324 | 1.326715  |
| C | -3.105090 | 1.398087  | -0.880573 |
| H | -3.886235 | 0.472123  | 0.879650  |
| C | -1.941131 | 2.448098  | -2.876710 |
| H | -1.770159 | -3.346469 | 0.050049  |
| H | -3.103266 | -3.904444 | -1.006510 |
| H | -3.128975 | -4.279427 | 0.724645  |
| H | -5.720673 | -1.564256 | 0.399583  |
| H | -5.388294 | -2.740876 | -0.899606 |
| H | -5.464759 | -3.283796 | 0.797086  |
| H | -3.225236 | 2.367964  | -0.389361 |
| H | -1.678116 | 3.259793  | -2.182754 |
| H | -2.721458 | 2.825065  | -3.557262 |
| H | -1.057776 | 2.194888  | -3.480750 |
| C | 3.880071  | -0.895866 | -0.363291 |
| C | 3.446866  | -1.915778 | 0.533991  |
| C | 3.823360  | 0.471657  | -0.000692 |
| H | 4.145599  | -1.175889 | -1.385176 |
| C | 2.951712  | -1.595339 | 1.822320  |
| H | 3.398608  | -2.950775 | 0.186283  |
| C | 4.215386  | 1.588319  | -0.934304 |
| C | 3.323332  | 0.790272  | 1.304308  |
| C | 2.416103  | -2.653680 | 2.725469  |
| C | 2.898867  | -0.214279 | 2.195420  |
| C | 5.636867  | 2.025428  | -0.582424 |
| C | 4.096038  | 1.233024  | -2.406431 |
| H | 3.529866  | 2.429532  | -0.719222 |
| H | 3.163797  | 1.840174  | 1.567872  |
| H | 1.617544  | -2.262317 | 3.371562  |
| H | 3.225606  | -3.023143 | 3.375764  |
| H | 2.026584  | -3.506393 | 2.151001  |
| H | 2.420435  | 0.067300  | 3.136917  |
| H | 5.722996  | 2.332240  | 0.472127  |
| H | 6.348232  | 1.199866  | -0.756690 |
| H | 5.941248  | 2.875867  | -1.211823 |
| H | 3.091736  | 0.855515  | -2.658550 |
| H | 4.838682  | 0.472290  | -2.701782 |
| H | 4.289151  | 2.125316  | -3.021067 |

\*

-----

**TS(B<sup>1</sup>-C<sup>1</sup>)**

CPCM (MeOH)

M06 SCF (DZ) = -1728.809388  
 G (1 atm) = -1728.405479  
 qh-G (1 mol/L) = -1728.396400  
 qh-G (24.56 mol/L) = -1728.393377  
 Lowest Frequency = -28.26

HF SCF energy (TZ) = -1720.995218

|    |           |           |           |
|----|-----------|-----------|-----------|
| C  | -1.739885 | 2.285731  | -3.370807 |
| C  | -3.044833 | 1.572732  | -1.302736 |
| C  | -3.361889 | -0.812579 | -0.703231 |
| C  | -3.534577 | 0.572973  | -0.419608 |
| C  | -3.860043 | -1.826912 | 0.308070  |
| C  | -3.196340 | -3.197287 | 0.196754  |
| C  | -5.385241 | -1.932840 | 0.172715  |
| H  | -1.458291 | -0.444256 | -3.553197 |
| H  | -2.339210 | -2.189129 | -2.049225 |
| H  | -1.500070 | 3.189293  | -2.794993 |
| H  | -2.464767 | 2.556208  | -4.153305 |
| H  | -0.827973 | 1.914902  | -3.856889 |
| H  | -3.098786 | 2.616810  | -0.991198 |
| H  | -3.903389 | 0.864141  | 0.575099  |
| H  | -3.639010 | -1.393897 | 1.298472  |
| H  | -2.100046 | -3.127435 | 0.252880  |
| H  | -3.465853 | -3.702769 | -0.744499 |
| H  | -3.534815 | -3.838732 | 1.023258  |
| H  | -5.871565 | -0.956858 | 0.320761  |
| H  | -5.665815 | -2.308348 | -0.824618 |
| H  | -5.782276 | -2.629982 | 0.925329  |
| Ru | 1.821865  | -0.244483 | 0.318436  |
| Cl | 1.150831  | -1.379306 | -1.728805 |
| C  | 3.905658  | -0.577337 | -0.096234 |
| C  | 3.729011  | 0.792100  | 0.205649  |
| C  | 3.427758  | -1.596757 | 0.781805  |
| C  | 4.163473  | 1.908154  | -0.723353 |
| C  | 3.069055  | 1.116923  | 1.437556  |
| C  | 2.770586  | -1.268021 | 1.991050  |
| C  | 4.143408  | 1.525428  | -2.201604 |
| C  | 5.549542  | 2.395551  | -0.281647 |
| C  | 2.601895  | 0.118245  | 2.310337  |
| C  | 2.202876  | -2.333013 | 2.881637  |
| H  | 4.310551  | -0.873052 | -1.064006 |
| H  | 3.490198  | -2.640565 | 0.471649  |
| H  | 3.446015  | 2.731491  | -0.571536 |
| H  | 2.828113  | 2.160266  | 1.650849  |
| H  | 3.157188  | 1.144711  | -2.508043 |
| H  | 4.900199  | 0.760249  | -2.435705 |
| H  | 4.372856  | 2.410399  | -2.812690 |
| H  | 5.552378  | 2.698966  | 0.776191  |
| H  | 6.301687  | 1.601225  | -0.413502 |
| H  | 5.855421  | 3.261721  | -0.886839 |
| H  | 2.013914  | 0.401949  | 3.184586  |
| H  | 1.947933  | -3.233898 | 2.308689  |
| H  | 2.959850  | -2.602049 | 3.634113  |
| H  | 1.309265  | -1.972849 | 3.407566  |
| O  | -2.027428 | 2.081891  | 1.733708  |
| C  | -2.604725 | 1.425299  | 2.642185  |
| C  | -1.818636 | 1.184662  | 3.934051  |
| O  | -3.759796 | 0.921820  | 2.568510  |
| H  | -1.173167 | 2.043016  | 4.169021  |
| H  | -1.164887 | 0.310186  | 3.779503  |
| H  | -2.486500 | 0.970286  | 4.779739  |

\*

-----

**TS(B<sup>1</sup>-C<sup>1</sup>)**

CPCM (MeOH)

wB97X-D3 SCF (DZ) = -1729.447832  
 G (1 atm) = -1729.031345  
 qh G-E (1 mol/L) = 0.431157  
 qh G-E (24.56 mol/L) = 0.434180  
 Lowest Frequency = -28.51

HF SCF energy (TZ) = -1721.000489

HF SCF energy (QZ) = -1721.073708  
 Correlation energy (DZ) = -4.843012  
 Correlation energy (TZ) = -5.950681  
 DLPNO-CCSD(T1)/CBS = -1727.695290

HF SCF energy (QZ) = -1721.077998  
 Correlation energy (DZ) = -4.838739  
 Correlation energy (TZ) = -5.944221  
 DLPNO-CCSD(T1)/CBS = -1727.691546

\*xyz 0 1

|    |           |           |           |
|----|-----------|-----------|-----------|
| Ru | -0.794608 | -0.721767 | 0.041799  |
| C  | -2.024073 | -1.822992 | -1.296239 |
| C  | -2.856132 | -0.917459 | -0.564930 |
| C  | -0.910604 | -1.366784 | -2.047576 |
| O  | 0.661078  | -1.983819 | 0.680998  |
| Cl | -1.201275 | -0.388446 | 2.386675  |
| C  | -4.032730 | -1.387880 | 0.251830  |
| C  | -2.524609 | 0.461416  | -0.603875 |
| C  | -0.546274 | -0.001806 | -2.028901 |
| C  | 1.529131  | -2.620168 | -0.068648 |
| C  | -3.860028 | -2.774774 | 0.849800  |
| C  | -5.276848 | -1.320194 | -0.632650 |
| C  | -1.367134 | 0.897923  | -1.279155 |
| C  | 0.702259  | 0.460459  | -2.700963 |
| C  | 2.233752  | -3.729736 | 0.671273  |
| O  | 1.759568  | -2.384566 | -1.248586 |
| H  | -2.200621 | -2.898499 | -1.215064 |
| H  | -0.237693 | -2.089379 | -2.509955 |
| H  | -4.148081 | -0.663114 | 1.078288  |
| H  | -3.075380 | 1.163404  | 0.029038  |
| H  | -2.932744 | -2.852694 | 1.439627  |
| H  | -3.848445 | -3.556806 | 0.071708  |
| H  | -4.707501 | -2.999289 | 1.515557  |
| H  | -5.441415 | -0.306000 | -1.029949 |
| H  | -5.180637 | -2.010609 | -1.488769 |
| H  | -6.169957 | -1.614284 | -0.059521 |
| H  | -1.047802 | 1.939024  | -1.170136 |
| H  | 1.518105  | -0.252356 | -2.506361 |
| H  | 0.540670  | 0.512954  | -3.789992 |
| H  | 0.997214  | 1.461979  | -2.354717 |
| H  | 2.465705  | -3.434007 | 1.704046  |
| H  | 1.558846  | -4.599881 | 0.724295  |
| H  | 3.149176  | -4.027087 | 0.142469  |
| N  | 1.848326  | 1.247687  | 0.518086  |
| C  | 3.025061  | 0.495726  | 0.346705  |
| C  | 1.841737  | 2.476497  | 0.160698  |
| C  | 3.363416  | -0.416479 | 1.353700  |
| C  | 3.843267  | 0.598087  | -0.787383 |
| C  | 0.661237  | 3.332713  | 0.289732  |
| C  | 4.519460  | -1.181400 | 1.248233  |
| C  | 4.987795  | -0.187022 | -0.896673 |
| C  | 0.564664  | 4.484804  | -0.500631 |
| C  | -0.385402 | 3.005262  | 1.164405  |
| C  | 5.334392  | -1.074682 | 0.120630  |
| C  | -0.579199 | 5.277314  | -0.450834 |
| C  | -1.517922 | 3.807435  | 1.223703  |
| C  | -1.622268 | 4.938008  | 0.409079  |
| H  | 2.740855  | 2.959968  | -0.273905 |
| H  | 2.704740  | -0.501857 | 2.222518  |
| H  | 3.566553  | 1.277435  | -1.599096 |
| H  | 4.781732  | -1.878166 | 2.049212  |
| H  | 5.612563  | -0.106891 | -1.790233 |
| H  | 1.387971  | 4.746956  | -1.172784 |
| H  | -0.301181 | 2.108917  | 1.785387  |
| H  | 6.234321  | -1.688314 | 0.031829  |
| H  | -0.655846 | 6.165292  | -1.082789 |
| H  | -2.329767 | 3.549673  | 1.909667  |
| H  | -2.518078 | 5.562615  | 0.453109  |

\*

SMD (MeOH)

HF SCF energy (TZ) = -1721.013430  
 HF SCF energy (QZ) = -1721.090882  
 Correlation energy (DZ) = -4.835733  
 Correlation energy (TZ) = -5.941728  
 DLPNO-CCSD(T1)/CBS = -1727.702220

\*xyz 0 1

|    |           |           |           |
|----|-----------|-----------|-----------|
| Ru | 0.799158  | 0.163250  | -0.185152 |
| N  | -2.589139 | 1.221908  | 0.247282  |
| O  | 0.334773  | -0.335838 | 1.722559  |
| C  | -3.680539 | 0.558797  | 0.192992  |
| C  | -2.691687 | 2.634506  | 0.222901  |
| Cl | 1.144962  | 2.334791  | 0.719632  |
| C  | 0.645376  | -1.412173 | 2.401519  |
| C  | -3.736458 | -0.912592 | 0.264348  |
| H  | -4.652614 | 1.067413  | 0.063765  |
| C  | -1.901497 | 3.357921  | -0.678547 |
| C  | -3.530591 | 3.324067  | 1.107909  |
| C  | -0.176083 | -1.581847 | 3.660829  |
| O  | 1.518726  | -2.213906 | 2.084312  |
| C  | -2.631624 | -1.669101 | 0.676611  |
| C  | -4.922585 | -1.565113 | -0.092468 |
| C  | -1.979646 | 4.746928  | -0.719519 |
| H  | -1.227746 | 2.820165  | -1.347202 |
| C  | -3.592368 | 4.717398  | 1.072824  |
| H  | -4.117582 | 2.764050  | 1.839908  |
| H  | -0.138230 | -0.663749 | 4.263288  |
| H  | -1.228854 | -1.753745 | 3.389658  |
| H  | 0.192198  | -2.432681 | 4.245508  |
| C  | -2.707546 | -3.057535 | 0.714681  |
| H  | -1.717936 | -1.152241 | 0.972846  |
| C  | -4.996924 | -2.957109 | -0.058525 |
| H  | -5.789636 | -0.976665 | -0.404639 |
| C  | -2.823860 | 5.433702  | 0.156336  |
| H  | -1.367046 | 5.299722  | -1.435475 |
| H  | -4.245427 | 5.245104  | 1.771795  |
| C  | -3.889443 | -3.704583 | 0.342344  |
| H  | -1.840555 | -3.638550 | 1.038375  |
| H  | -5.922503 | -3.460181 | -0.349553 |
| H  | -2.874018 | 6.524313  | 0.129992  |
| H  | -3.948188 | -4.794927 | 0.371392  |
| C  | 1.511218  | -1.760013 | -0.881618 |
| C  | 2.536501  | -0.770176 | -0.977699 |
| C  | 0.237712  | -1.537603 | -1.433434 |
| H  | 1.672482  | -2.624391 | -0.239617 |
| C  | 3.861800  | -1.008592 | -0.282223 |
| C  | 2.256942  | 0.407131  | -1.736663 |
| C  | -0.051709 | -0.331228 | -2.138548 |
| H  | -0.565163 | -2.250452 | -1.239752 |
| C  | 4.566020  | 0.269267  | 0.169782  |
| C  | 4.753858  | -1.843837 | -1.209948 |
| H  | 3.624817  | -1.607950 | 0.611285  |
| C  | 0.988511  | 0.619149  | -2.314472 |
| H  | 2.987999  | 1.215133  | -1.771183 |
| C  | -1.424970 | -0.089064 | -2.689573 |
| H  | 5.453824  | 0.008511  | 0.764259  |
| H  | 4.909398  | 0.873265  | -0.685152 |
| H  | 3.909482  | 0.894526  | 0.793677  |
| H  | 4.270916  | -2.792263 | -1.489481 |
| H  | 4.982310  | -1.289042 | -2.134340 |

|   |           |           |           |
|---|-----------|-----------|-----------|
| H | 5.704485  | -2.078462 | -0.708472 |
| H | 0.767693  | 1.574404  | -2.792483 |
| H | -1.648097 | 0.982144  | -2.765949 |
| H | -1.467455 | -0.522382 | -3.701207 |
| H | -2.191788 | -0.578408 | -2.076376 |

\*

**TS(B<sup>2</sup>-C<sup>2</sup>)**

CPCM (MeOH)  
M06 SCF (DZ) = -1496.970516  
G (1 atm) = -1496.518831  
qh-G (1 mol/L) = -1496.509602  
qh-G (24.56 mol/L) = -1496.506580  
Lowest Frequency = -20.61

HF SCF energy (TZ) = -1488.759523  
HF SCF energy (QZ) = -1488.850472  
Correlation energy (DZ) = -5.373709  
Correlation energy (TZ) = -6.580833  
DLPNO-CCSD(T1)/CBS = -1496.164075

\*xyz 0 1

|    |           |           |           |
|----|-----------|-----------|-----------|
| Ru | -0.618451 | -0.749879 | -0.164348 |
| C  | -1.594789 | -2.085852 | -1.497461 |
| N  | 1.865006  | 1.304376  | 0.392472  |
| C  | -2.575930 | -1.205080 | -0.943290 |
| C  | -0.461454 | -1.591620 | -2.187350 |
| H  | -1.678822 | -3.161838 | -1.322083 |
| O  | 0.768412  | -1.931449 | 0.758309  |
| O  | -0.930414 | -0.273884 | 1.811685  |
| C  | 3.095196  | 0.622024  | 0.355396  |
| C  | 1.822328  | 2.521780  | -0.002519 |
| C  | -3.781489 | -1.738587 | -0.211874 |
| C  | -2.376867 | 0.193849  | -1.099190 |
| C  | -0.225482 | -0.202961 | -2.263422 |
| H  | 0.323495  | -2.280110 | -2.499768 |
| C  | 1.729728  | -2.605402 | 0.181668  |
| C  | -1.949796 | 0.335363  | 2.355469  |
| C  | 3.397956  | -0.236092 | 1.419487  |
| C  | 4.001479  | 0.740195  | -0.707786 |
| C  | 0.586110  | 3.305136  | -0.007480 |
| H  | 2.730001  | 3.047645  | -0.363276 |
| C  | -3.456129 | -2.875658 | 0.745778  |
| C  | -4.819003 | -2.165184 | -1.248391 |
| H  | -4.180943 | -0.898367 | 0.378854  |
| C  | -1.200377 | 0.679159  | -1.699710 |
| H  | -3.051203 | 0.884248  | -0.591069 |
| C  | 1.037154  | 0.317524  | -2.862666 |
| C  | 2.382754  | -3.601531 | 1.109904  |
| O  | 2.089213  | -2.489621 | -0.985347 |
| C  | -1.713826 | 0.685764  | 3.804933  |
| O  | -2.994469 | 0.641562  | 1.787958  |
| C  | 4.600830  | -0.933546 | 1.437643  |
| H  | 2.671121  | -0.336530 | 2.230219  |
| C  | 5.192958  | 0.020163  | -0.694879 |
| H  | 3.756696  | 1.376752  | -1.563157 |
| C  | 0.490788  | 4.449251  | -0.808602 |
| C  | -0.516358 | 2.908293  | 0.761009  |
| H  | -4.360014 | -3.160726 | 1.306550  |
| H  | -3.110642 | -3.779374 | 0.215060  |
| H  | -2.680014 | -2.583734 | 1.471759  |
| H  | -5.740522 | -2.504821 | -0.749848 |
| H  | -5.081854 | -1.337587 | -1.926547 |
| H  | -4.440429 | -3.000890 | -1.862852 |
| H  | -0.990295 | 1.753391  | -1.671919 |

**TS(B<sup>2</sup>-C<sup>2</sup>)**

CPCM (MeOH)  
wB97X-D3 SCF (DZ) = -1497.667583  
G (1 atm) = -1497.202629  
qh G-E (1 mol/L) = 0.477454  
qh G-E (24.56 mol/L) = 0.480476  
Lowest Frequency = -37.11

HF SCF energy (TZ) = -1488.764135  
HF SCF energy (QZ) = -1488.853700  
Correlation energy (DZ) = -5.372576  
Correlation energy (TZ) = -6.579057  
DLPNO-CCSD(T1)/CBS = -1496.164734

SMD (MeOH)

HF SCF energy (TZ) = -1488.784109  
HF SCF energy (QZ) = -1488.873416  
Correlation energy (DZ) = -5.366058  
Correlation energy (TZ) = -6.573832  
DLPNO-CCSD(T1)/CBS = -1496.179902

\*xyz 0 1

|    |           |           |           |
|----|-----------|-----------|-----------|
| Ru | -0.589714 | -0.831628 | -0.193686 |
| O  | -0.889026 | -0.396662 | 1.774617  |
| O  | 0.854883  | -1.960216 | 0.686766  |
| C  | -1.873784 | 0.226514  | 2.368686  |
| C  | 1.824754  | -2.634969 | 0.124794  |
| C  | -1.632403 | 0.434549  | 3.849031  |
| O  | -2.892608 | 0.639967  | 1.821285  |
| C  | 2.459423  | -3.646019 | 1.056474  |
| O  | 2.206744  | -2.501204 | -1.034675 |
| C  | -1.646943 | -2.123690 | -1.490973 |
| C  | -0.480248 | -1.709615 | -2.184256 |
| C  | -2.575002 | -1.177071 | -0.957355 |
| C  | -0.155749 | -0.340955 | -2.283044 |
| C  | -3.824314 | -1.618948 | -0.222263 |
| C  | -2.280860 | 0.201703  | -1.120260 |
| C  | 1.136856  | 0.100912  | -2.902306 |
| C  | -1.070956 | 0.604651  | -1.721499 |
| C  | -3.580183 | -2.761064 | 0.764484  |
| C  | -4.895925 | -1.978879 | -1.258264 |
| H  | -1.291506 | -0.499412 | 4.316050  |
| H  | -0.831534 | 1.179252  | 3.977326  |
| H  | -2.542708 | 0.798007  | 4.340153  |
| H  | 2.626546  | -3.203909 | 2.047545  |
| H  | 1.764634  | -4.491111 | 1.182754  |
| H  | 3.404041  | -4.016461 | 0.640328  |
| H  | -1.798304 | -3.188431 | -1.308891 |
| H  | 0.251086  | -2.454830 | -2.492129 |
| H  | -4.161197 | -0.746302 | 0.354212  |
| H  | -2.908195 | 0.941844  | -0.626769 |
| H  | 1.945532  | -0.582607 | -2.613867 |
| H  | 1.035134  | 0.085915  | -3.998173 |
| H  | 1.392009  | 1.123848  | -2.596963 |
| H  | -0.795499 | 1.660599  | -1.704193 |
| H  | -2.812442 | -2.489897 | 1.504533  |
| H  | -3.263373 | -3.688051 | 0.260798  |
| H  | -4.511312 | -2.984453 | 1.305909  |

|   |           |           |           |
|---|-----------|-----------|-----------|
| H | 0.929663  | 0.377250  | -3.958290 |
| H | 1.269689  | 1.327747  | -2.494153 |
| H | 1.875162  | -0.358624 | -2.636381 |
| H | 2.493784  | -3.188337 | 2.122465  |
| H | 1.733760  | -4.489225 | 1.188792  |
| H | 3.358926  | -3.914491 | 0.715689  |
| H | -1.288848 | -0.168236 | 4.351411  |
| H | -0.974436 | 1.502051  | 3.860076  |
| H | -2.645107 | 1.018264  | 4.281062  |
| C | 5.500812  | -0.814426 | 0.378180  |
| H | 4.833746  | -1.587820 | 2.282333  |
| H | 5.885846  | 0.109949  | -1.535723 |
| C | -0.703646 | 5.163157  | -0.868423 |
| H | 1.355143  | 4.768049  | -1.399684 |
| C | -1.703686 | 3.626032  | 0.709766  |
| H | -0.414016 | 2.019575  | 1.386930  |
| H | 6.437722  | -1.376889 | 0.386201  |
| C | -1.800994 | 4.751340  | -0.113007 |
| H | -0.778820 | 6.047057  | -1.506363 |
| H | -2.557135 | 3.293410  | 1.307421  |
| H | -2.736391 | 5.314866  | -0.159661 |

\*

-----

|   |           |           |            |
|---|-----------|-----------|------------|
| H | -5.089162 | -1.139419 | -1.943295  |
| H | -4.589283 | -2.848825 | -1.861956  |
| H | -5.839921 | -2.232168 | -0.752902  |
| N | 1.841072  | 1.388003  | 0.421920   |
| C | 1.785827  | 2.591002  | -0.004627  |
| C | 3.086373  | 0.715659  | 0.397022   |
| C | 0.526227  | 3.357076  | -0.016047  |
| C | 3.414155  | -0.085269 | 1.497480   |
| C | 3.966373  | 0.785457  | -0.690720  |
| C | 0.404511  | 4.479014  | -0.843961  |
| C | -0.560514 | 2.960723  | 0.773829   |
| C | 4.616889  | -0.785764 | 1.521059   |
| C | 5.162398  | 0.068546  | -0.667867  |
| C | -0.801636 | 5.177277  | -0.902180  |
| C | -1.760847 | 3.659640  | 0.720522   |
| C | 5.494227  | -0.715858 | 0.436479   |
| C | -1.884361 | 4.767604  | -0.122905  |
| H | 2.680103  | 3.113701  | -0.387937  |
| H | 2.712246  | -0.148857 | 2.331283   |
| H | 3.702937  | 1.380450  | -1.567928  |
| H | 1.253588  | 4.795452  | -1.455700  |
| H | -0.443799 | 2.092615  | 1.421641   |
| H | 4.866948  | -1.402295 | 2.387607   |
| H | 5.835536  | 0.120348  | -1.526690  |
| H | -0.896253 | 6.045691  | -1.557517  |
| H | -2.601156 | 3.327492  | 1.333406   |
| H | 6.430224  | -1.278345 | 0.449687   |
| H | -2.827733 | 5.316537  | -0.167919* |

\*

-----

#### TS(B<sup>+</sup>-D<sup>+</sup>)

CPCM (MeOH)

M06 SCF (DZ) = -1268.413729

G (1 atm) = -1268.006359

qh-G (1 mol/L) = -1267.998203

qh-G (24.56 mol/L) = -1267.995180

Lowest Frequency = -80.41

HF SCF energy (TZ) = -1261.305051

HF SCF energy (QZ) = -1261.379549

Correlation energy (DZ) = -4.667257

Correlation energy (TZ) = -5.701238

DLPNO-CCSD(T1)/CBS = -1267.707426

\*xyz 1 1

|    |           |           |           |
|----|-----------|-----------|-----------|
| Ru | 1.002769  | -1.010779 | 0.035814  |
| C  | 2.297732  | -2.110016 | 1.311956  |
| C  | 2.928188  | -1.905412 | 0.044685  |
| C  | 1.798937  | -1.026604 | 2.076791  |
| H  | 2.091337  | -3.133318 | 1.637545  |
| C  | 3.052852  | -0.556803 | -0.415972 |
| C  | 2.548786  | 0.520263  | 0.340176  |
| C  | 1.884090  | 0.297391  | 1.579879  |
| N  | -1.981241 | 0.689966  | -0.595266 |
| O  | 0.334067  | -1.441315 | -1.944847 |
| O  | -0.423618 | -2.554051 | -0.249969 |
| C  | 3.337461  | -3.056976 | -0.807371 |
| H  | 1.228486  | -1.235951 | 2.984143  |
| H  | 3.424113  | -0.373692 | -1.428625 |
| H  | 2.545861  | 1.524919  | -0.093894 |
| C  | 1.225850  | 1.454498  | 2.287011  |
| C  | -3.208900 | 0.255968  | -0.059785 |
| C  | -1.663370 | 1.923780  | -0.454770 |
| C  | -0.506656 | -2.284926 | -1.495888 |
| H  | 2.700291  | -3.933353 | -0.618753 |

|   |           |           |           |
|---|-----------|-----------|-----------|
| H | 3.286530  | -2.796997 | -1.874209 |
| H | 4.377343  | -3.338892 | -0.575888 |
| C | 2.175621  | 1.959492  | 3.371303  |
| C | -0.146882 | 1.120678  | 2.853349  |
| H | 1.104019  | 2.251461  | 1.529976  |
| C | -3.259050 | -0.992532 | 0.575605  |
| C | -4.386033 | 1.009209  | -0.181256 |
| C | -0.458397 | 2.522146  | -1.030877 |
| H | -2.291774 | 2.612468  | 0.146832  |
| C | -1.559707 | -2.880095 | -2.348054 |
| H | 1.745546  | 2.841866  | 3.869612  |
| H | 2.339681  | 1.182346  | 4.137342  |
| H | 3.155277  | 2.242851  | 2.955529  |
| H | -0.083499 | 0.425805  | 3.707627  |
| H | -0.628751 | 2.039943  | 3.221556  |
| H | -0.807982 | 0.672227  | 2.092134  |
| C | -4.453810 | -1.454683 | 1.117853  |
| H | -2.344297 | -1.589418 | 0.639796  |
| C | -5.580644 | 0.531823  | 0.350448  |
| H | -4.366914 | 1.958192  | -0.724950 |
| C | -0.014510 | 3.751427  | -0.525918 |
| C | 0.259477  | 1.904479  | -2.065946 |
| H | -1.253953 | -2.885395 | -3.401207 |
| H | -2.462390 | -2.254309 | -2.249325 |
| H | -1.808907 | -3.891878 | -2.004244 |
| C | -5.619073 | -0.695864 | 1.009399  |
| H | -4.476454 | -2.423349 | 1.623822  |
| H | -6.493041 | 1.123875  | 0.240735  |
| C | 1.148832  | 4.337510  | -1.016481 |
| H | -0.584538 | 4.240980  | 0.270711  |
| C | 1.414703  | 2.496921  | -2.562499 |
| H | -0.096837 | 0.951470  | -2.467008 |
| H | -6.559014 | -1.067843 | 1.424290  |
| C | 1.865303  | 3.709672  | -2.034685 |
| H | 1.494848  | 5.290119  | -0.608816 |
| H | 1.969021  | 2.013567  | -3.371312 |
| H | 2.774427  | 4.171663  | -2.427578 |

\*

-----  
**TS(B<sup>+5</sup>-D<sup>+5</sup>)**

CPCM (MeOH)

M06 SCF (DZ) = -1384.087819

G (1 atm) = -1383.633874

qh-G (1 mol/L) = -1383.624097

qh-G (24.56 mol/L) = -1383.621074

Lowest Frequency = -93.20

HF SCF energy (TZ) = -1376.382060

HF SCF energy (QZ) = -1376.464894

Correlation energy (DZ) = -5.076140

Correlation energy (TZ) = -6.201937

DLPNO-CCSD(T1)/CBS = -1383.349633

\*xyz 1 1

|    |           |           |           |
|----|-----------|-----------|-----------|
| Ru | 0.030003  | -1.110431 | 0.221251  |
| O  | -2.021533 | -0.609531 | 1.117520  |
| N  | -0.636725 | 1.344408  | -0.607313 |
| C  | -2.370133 | -0.259255 | 2.446005  |
| H  | -2.581127 | -1.325441 | 0.773085  |
| O  | -0.480969 | -1.134864 | -2.023138 |
| O  | -1.637837 | -2.394914 | -0.679634 |
| C  | -2.003322 | 1.692510  | -0.401599 |
| C  | 0.124628  | 2.320324  | -0.942261 |
| H  | -1.795151 | 0.641510  | 2.707864  |
| H  | -3.442143 | -0.014648 | 2.506014  |

|   |           |           |           |
|---|-----------|-----------|-----------|
| H | -2.141424 | -1.065055 | 3.164442  |
| C | -1.416837 | -1.962707 | -1.855338 |
| C | -2.387530 | 2.584847  | 0.599840  |
| C | -2.969621 | 1.109654  | -1.225609 |
| C | 1.530007  | 2.200164  | -1.339152 |
| H | -0.289317 | 3.347625  | -0.969043 |
| C | -2.261681 | -2.432074 | -2.993099 |
| C | -3.738276 | 2.874705  | 0.789702  |
| H | -1.627011 | 3.039934  | 1.242285  |
| C | -4.313370 | 1.408042  | -1.034481 |
| H | -2.644337 | 0.433183  | -2.020466 |
| C | 2.443611  | 3.175749  | -0.919114 |
| C | 1.952759  | 1.167532  | -2.184799 |
| H | -1.971967 | -1.947601 | -3.933131 |
| H | -3.319072 | -2.220972 | -2.773378 |
| H | -2.164402 | -3.523343 | -3.093133 |
| C | -4.704724 | 2.284169  | -0.019900 |
| H | -4.033627 | 3.568519  | 1.580926  |
| H | -5.064623 | 0.954164  | -1.686020 |
| C | 3.783113  | 3.077760  | -1.280212 |
| H | 2.099791  | 4.001887  | -0.288772 |
| C | 3.287814  | 1.094609  | -2.571678 |
| H | 1.219119  | 0.437496  | -2.539926 |
| H | -5.762697 | 2.510247  | 0.132839  |
| C | 4.205914  | 2.035829  | -2.105785 |
| H | 4.498901  | 3.824292  | -0.928737 |
| H | 3.616566  | 0.296704  | -3.242931 |
| H | 5.255244  | 1.967557  | -2.402846 |
| C | 2.096130  | -1.425035 | -0.223602 |
| C | 2.005491  | -0.388314 | 0.748410  |
| C | 1.483416  | -2.688473 | -0.019540 |
| H | 2.563161  | -1.213147 | -1.188091 |
| C | 1.309593  | -0.587915 | 1.966871  |
| H | 2.424924  | 0.592307  | 0.511815  |
| C | 1.493174  | -3.733669 | -1.081307 |
| C | 0.730699  | -2.864034 | 1.177936  |
| C | 1.223963  | 0.461628  | 3.045170  |
| C | 0.658085  | -1.834579 | 2.153929  |
| H | 1.603383  | -3.287071 | -2.079491 |
| H | 2.346989  | -4.410277 | -0.915685 |
| H | 0.575267  | -4.338046 | -1.053727 |
| H | 0.121372  | -3.763176 | 1.298782  |
| C | 2.378344  | 0.207209  | 4.016068  |
| C | 1.242487  | 1.893699  | 2.541322  |
| H | 0.277008  | 0.287843  | 3.588766  |
| H | 0.012804  | -1.972891 | 3.025945  |
| H | 2.331576  | 0.919414  | 4.854052  |
| H | 2.349022  | -0.813219 | 4.429059  |
| H | 3.347295  | 0.342910  | 3.505741  |
| H | 2.203687  | 2.146301  | 2.061190  |
| H | 1.113804  | 2.586484  | 3.386562  |
| H | 0.434240  | 2.084831  | 1.817505  |

\*

-----

**TS(C<sup>1</sup>-D<sup>+</sup>)**

CPCM (MeOH)

|                      |              |
|----------------------|--------------|
| M06 SCF (DZ) =       | -1728.791257 |
| G (1 atm) =          | -1728.384749 |
| qh-G (1 mol/L) =     | -1728.376250 |
| qh-G (24.56 mol/L) = | -1728.373228 |
| Lowest Frequency =   | -53.99       |

|                           |              |
|---------------------------|--------------|
| HF SCF energy (TZ) =      | -1720.985382 |
| HF SCF energy (QZ) =      | -1721.063285 |
| Correlation energy (DZ) = | -4.839064    |

**TS(C<sup>1</sup>-D<sup>+</sup>)**

CPCM (MeOH)

|                        |              |
|------------------------|--------------|
| wB97X-D3 SCF (DZ) =    | -1729.435313 |
| G (1 atm) =            | -1729.016145 |
| qh G-E (1 mol/L) =     | 0.431412     |
| qh G-E (24.56 mol/L) = | 0.434435     |
| Lowest Frequency =     | -49.36       |

|                           |              |
|---------------------------|--------------|
| HF SCF energy (TZ) =      | -1720.986830 |
| HF SCF energy (QZ) =      | -1721.064945 |
| Correlation energy (DZ) = | -4.841266    |

Correlation energy (TZ) = -5.948528  
DLPNO-CCSD(T1)/CBS = -1727.683587

PBE0+D3BJ (ATZ) = -1728.602705  
M06-2X (ATZ) = -1729.457027  
wB97M-V (ATZ) = -1729.513309  
B2GP-PLYP (ATZ) = -1728.615278  
B2K-PLYP (ATZ) = -1728.416973  
PWPB95 (ATZ) = -1729.076343  
PWPB95+D3BJ (ATZ) = -1729.119392  
PWPB95+D4 (ATZ) = -1729.134026

\*xyz 0 1

|    |           |           |           |
|----|-----------|-----------|-----------|
| Ru | -0.061199 | 0.622097  | 0.563147  |
| N  | -0.294987 | -1.055884 | -0.821685 |
| O  | -1.592258 | -0.267432 | 1.571626  |
| C  | 0.591801  | -1.836487 | -1.347190 |
| C  | -1.645771 | -1.320428 | -1.236225 |
| Cl | -2.741549 | 2.980094  | -0.496186 |
| C  | -1.536093 | -1.440195 | 2.134909  |
| C  | 1.967193  | -2.004569 | -0.893283 |
| H  | 0.277186  | -2.467191 | -2.196101 |
| C  | -2.457406 | -0.305605 | -1.741590 |
| C  | -2.149212 | -2.616829 | -1.088048 |
| C  | -2.884822 | -1.936450 | 2.586941  |
| O  | -0.506995 | -2.093256 | 2.292067  |
| C  | 2.235018  | -2.203066 | 0.468185  |
| C  | 3.005252  | -2.059421 | -1.833247 |
| C  | -3.768214 | -0.595539 | -2.107980 |
| H  | -2.085175 | 0.719952  | -1.822363 |
| C  | -3.460085 | -2.898150 | -1.462743 |
| H  | -1.516325 | -3.392049 | -0.645286 |
| H  | -3.336980 | -1.216834 | 3.285710  |
| H  | -3.556594 | -2.003786 | 1.716032  |
| H  | -2.798450 | -2.918533 | 3.068173  |
| H  | 1.401343  | -2.207882 | 1.179956  |
| C  | 3.546715  | -2.411531 | 0.883584  |
| C  | 4.316243  | -2.230662 | -1.404102 |
| H  | 2.780995  | -1.941239 | -2.897404 |
| C  | -4.272546 | -1.888172 | -1.974543 |
| H  | -4.400678 | 0.207279  | -2.495743 |
| H  | -3.849975 | -3.911608 | -1.341852 |
| C  | 4.586701  | -2.406032 | -0.045885 |
| H  | 3.760580  | -2.579197 | 1.942241  |
| H  | 5.130869  | -2.242253 | -2.131510 |
| H  | -5.303869 | -2.106994 | -2.261365 |
| H  | 5.616276  | -2.557242 | 0.287507  |
| C  | 0.420353  | 2.699100  | 0.205984  |
| C  | 0.075451  | 2.538509  | 1.577949  |
| C  | 1.464671  | 1.953791  | -0.400045 |
| H  | -0.234754 | 3.336733  | -0.396132 |
| C  | 0.706077  | 1.562289  | 2.377357  |
| H  | -0.797157 | 3.074889  | 1.959023  |
| C  | 1.851219  | 2.141873  | -1.846782 |
| C  | 2.093417  | 0.976534  | 0.400517  |
| C  | 0.254425  | 1.263452  | 3.765317  |
| C  | 1.696459  | 0.745135  | 1.747426  |
| C  | 0.664189  | 2.105822  | -2.798273 |
| C  | 2.629300  | 3.448799  | -1.979290 |
| H  | 2.527955  | 1.305625  | -2.105098 |
| H  | 2.834597  | 0.314614  | -0.054598 |
| H  | -0.773807 | 1.612583  | 3.933005  |
| H  | 0.913107  | 1.771054  | 4.488074  |
| H  | 0.303186  | 0.182136  | 3.962137  |
| H  | 2.130197  | -0.091201 | 2.301996  |
| H  | 0.138705  | 1.138083  | -2.753088 |

Correlation energy (TZ) = -5.950231  
DLPNO-CCSD(T1)/CBS = -1496.164734

PBE0+D3BJ (ATZ) = -1728.604633  
M06-2X (ATZ) = -1729.472449  
wB97M-V (ATZ) = -1729.522748  
B2GP-PLYP (ATZ) = -1728.632448  
B2K-PLYP (ATZ) = -1728.438218  
PWPB95 (ATZ) = -1729.088152  
PWPB95+D3BJ (ATZ) = -1729.131463  
PWPB95+D4 (ATZ) = -1729.145983

SMD (MeOH)

HF SCF energy (TZ) = -1720.997958  
HF SCF energy (QZ) = -1721.076199  
Correlation energy (DZ) = -4.836265  
Correlation energy (TZ) = -5.945954  
DLPNO-CCSD(T1)/CBS = -1727.694158

\*xyz 0 1

|    |           |           |           |
|----|-----------|-----------|-----------|
| Ru | -0.055944 | 0.536305  | 0.620310  |
| O  | -0.598822 | -2.332992 | 2.046306  |
| O  | -1.542186 | -0.333872 | 1.687603  |
| C  | -1.568997 | -1.578416 | 2.078319  |
| C  | -2.921108 | -2.030106 | 2.577574  |
| C  | 1.704216  | 0.780180  | 1.776033  |
| C  | 2.077662  | 0.958949  | 0.416541  |
| C  | 0.695828  | 1.596177  | 2.378059  |
| C  | 1.404529  | 1.867471  | -0.427986 |
| C  | 0.288358  | 1.381057  | 3.803720  |
| C  | 0.016989  | 2.498920  | 1.538914  |
| C  | 1.809917  | 2.012781  | -1.881597 |
| C  | 0.332804  | 2.592831  | 0.151491  |
| C  | 0.633233  | 2.001815  | -2.855478 |
| C  | 2.651647  | 3.287611  | -2.021403 |
| H  | -3.317890 | -1.310568 | 3.306650  |
| H  | -3.616885 | -2.060674 | 1.725186  |
| H  | -2.849255 | -3.027271 | 3.026346  |
| H  | 2.180571  | -0.008417 | 2.360067  |
| H  | 2.842596  | 0.309844  | -0.008858 |
| H  | 0.420626  | 0.329675  | 4.091860  |
| H  | 0.925726  | 1.999332  | 4.453863  |
| H  | -0.757583 | 1.671156  | 3.963243  |
| H  | -0.864375 | 3.027078  | 1.902659  |
| H  | 2.453486  | 1.148601  | -2.114128 |
| H  | -0.333273 | 3.192098  | -0.469816 |
| H  | 0.095648  | 1.043515  | -2.819592 |
| H  | -0.085244 | 2.809934  | -2.646628 |
| H  | 1.001992  | 2.141851  | -3.882080 |
| H  | 3.512582  | 3.275941  | -1.336044 |
| H  | 2.046902  | 4.181494  | -1.798262 |
| H  | 3.032661  | 3.379714  | -3.049264 |
| C  | 2.281440  | -2.253137 | 0.483097  |
| N  | -0.269688 | -1.093985 | -0.789678 |
| C  | 1.996004  | -2.014741 | -0.866900 |
| C  | 3.608087  | -2.377393 | 0.891063  |
| C  | -1.627892 | -1.296980 | -1.226852 |
| C  | 0.600994  | -1.885194 | -1.311182 |
| C  | 3.028913  | -1.943227 | -1.809508 |
| C  | 4.642120  | -2.251176 | -0.037962 |
| C  | -2.361927 | -0.227551 | -1.734165 |
| C  | -2.210561 | -2.560129 | -1.088718 |
| C  | 4.352804  | -2.036499 | -1.387569 |
| C  | -3.683224 | -0.429506 | -2.127795 |
| C  | -3.532487 | -2.752159 | -1.484485 |
| C  | -4.269535 | -1.688986 | -2.008211 |



|   |           |          |           |
|---|-----------|----------|-----------|
| H | -0.067273 | 2.900650 | -2.573267 |
| H | 1.008718  | 2.257510 | -3.833005 |
| H | 3.496900  | 3.476657 | -1.301226 |
| H | 1.982458  | 4.310836 | -1.740269 |
| H | 2.993975  | 3.577254 | -3.010243 |

\*

-----

|    |           |           |           |
|----|-----------|-----------|-----------|
| H  | 1.454829  | -2.336547 | 1.194149  |
| H  | 3.835868  | -2.565150 | 1.942358  |
| H  | 0.278570  | -2.533351 | -2.138577 |
| H  | 2.795276  | -1.783239 | -2.864793 |
| H  | 5.681119  | -2.330608 | 0.289143  |
| H  | -1.918697 | 0.766724  | -1.804397 |
| H  | -1.637437 | -3.375396 | -0.642252 |
| H  | 5.162324  | -1.946737 | -2.114503 |
| H  | -4.256358 | 0.412238  | -2.520825 |
| H  | -3.990011 | -3.737149 | -1.372367 |
| H  | -5.307070 | -1.841191 | -2.312689 |
| Cl | -2.960518 | 2.756684  | -0.086775 |

\*

-----

**TS(C<sup>1</sup>-D<sup>+</sup>)\*S**

CPCM (MeOH)

wB97X-D3 SCF (DZ) = -1845.155432

G (1 atm) = -1844.688351

qh G-E (1 mol/L) = 0.482557

qh G-E (24.56 mol/L) = 0.485580

Lowest Frequency = -57.75

SMD (MeOH)

HF SCF energy (TZ) = -1836.091319

HF SCF energy (QZ) = -1836.176766

Correlation energy (DZ) = -5.222554

Correlation energy (TZ) = -6.423768

DLPNO-CCSD(T1)/CBS = -1843.328193

\*xyz 0 1

|    |           |           |           |
|----|-----------|-----------|-----------|
| Ru | -0.373339 | 0.364424  | 0.598364  |
| C  | 1.249886  | 0.981405  | 1.841887  |
| C  | 1.647027  | 1.092726  | 0.484407  |
| C  | 0.094896  | 1.659803  | 2.326007  |
| H  | 1.793826  | 0.306767  | 2.502487  |
| C  | -0.667812 | 2.368142  | 1.372822  |
| C  | -0.277409 | 2.472065  | 0.004162  |
| C  | 0.908924  | 1.867669  | -0.455144 |
| Cl | -3.788095 | 1.256846  | 0.723854  |
| C  | 2.090909  | -2.103646 | 0.346862  |
| N  | -0.468245 | -1.056953 | -1.025201 |
| O  | 0.231422  | -1.624570 | 3.245194  |
| O  | -1.194261 | -1.187154 | 1.572845  |
| H  | 2.517146  | 0.532386  | 0.141388  |
| C  | -0.353809 | 1.547660  | 3.753569  |
| H  | -1.640877 | 2.765361  | 1.664258  |
| H  | -0.959488 | 2.964671  | -0.693033 |
| C  | 1.425935  | 2.011318  | -1.873423 |
| H  | -3.129250 | 2.487800  | -0.939586 |
| H  | -5.418999 | 1.145664  | -0.777367 |
| H  | -3.560292 | 0.624817  | 2.782361  |
| C  | 1.840306  | -1.877321 | -1.012298 |
| C  | 3.404453  | -2.185395 | 0.802826  |
| H  | 1.263105  | -2.207911 | 1.050831  |
| C  | -1.788634 | -1.274574 | -1.559930 |
| C  | 0.464528  | -1.786016 | -1.526952 |
| C  | -0.878985 | -1.716185 | 2.730558  |
| H  | -1.435510 | 1.356153  | 3.810169  |
| H  | -0.136816 | 2.493265  | 4.272966  |
| H  | 0.174373  | 0.733483  | 4.263274  |
| C  | 0.355533  | 1.948423  | -2.959980 |
| C  | 2.217607  | 3.325653  | -1.938435 |
| H  | 2.131982  | 1.180689  | -2.037425 |
| O  | -2.844226 | 3.017553  | -1.711740 |
| O  | -6.216934 | 1.267844  | -1.326077 |

|   |           |           |           |
|---|-----------|-----------|-----------|
| O | -3.554388 | 0.471724  | 3.748426  |
| C | 2.906512  | -1.771695 | -1.914259 |
| C | 4.466946  | -2.031006 | -0.089215 |
| H | 3.596999  | -2.363619 | 1.862740  |
| C | -2.517652 | -0.211777 | -2.090051 |
| C | -2.339841 | -2.558666 | -1.510670 |
| H | 0.223007  | -2.397920 | -2.408143 |
| C | -2.020435 | -2.464024 | 3.374768  |
| H | 0.815683  | 2.148030  | -3.938810 |
| H | -0.442930 | 2.690284  | -2.804999 |
| H | -0.107060 | 0.952896  | -3.006536 |
| H | 2.999522  | 3.363356  | -1.164800 |
| H | 1.548514  | 4.189073  | -1.792259 |
| H | 2.700979  | 3.427737  | -2.921285 |
| C | -3.959083 | 3.789070  | -2.124588 |
| C | -7.138547 | 1.986942  | -0.532756 |
| C | -4.577542 | 1.280494  | 4.294451  |
| C | 4.217676  | -1.825100 | -1.447530 |
| H | 2.706211  | -1.620819 | -2.977861 |
| H | 5.495818  | -2.082357 | 0.273704  |
| C | -3.790793 | -0.444699 | -2.604746 |
| H | -2.114181 | 0.800574  | -2.094280 |
| C | -3.619417 | -2.778904 | -2.016000 |
| H | -1.771656 | -3.373893 | -1.057189 |
| H | -2.495500 | -3.134856 | 2.645690  |
| H | -2.770120 | -1.721785 | 3.690949  |
| H | -1.666954 | -3.032733 | 4.242874  |
| H | -4.161535 | 4.625821  | -1.431547 |
| H | -4.866642 | 3.167695  | -2.199922 |
| H | -3.732634 | 4.210366  | -3.114644 |
| H | -8.057719 | 2.124409  | -1.121536 |
| H | -7.403782 | 1.447468  | 0.395232  |
| H | -6.760842 | 2.987434  | -0.250088 |
| H | -5.573190 | 1.019002  | 3.892471  |
| H | -4.402475 | 2.355758  | 4.109356  |
| H | -4.593128 | 1.117628  | 5.381887  |
| H | 5.048199  | -1.713898 | -2.147381 |
| C | -4.345522 | -1.723068 | -2.568400 |
| H | -4.363644 | 0.389867  | -3.012491 |
| H | -4.050949 | -3.780931 | -1.970564 |
| H | -5.351062 | -1.893863 | -2.958451 |

\*

-----  
**TS(C<sup>1</sup>-D<sup>+</sup>)•S<sub>2</sub>**

CPCM (MeOH)

|                        |              |
|------------------------|--------------|
| wB97X-D3 SCF (DZ) =    | -1960.872280 |
| G (1 atm) =            | -1960.356847 |
| qh G-E (1 mol/L) =     | 0.533445     |
| qh G-E (24.56 mol/L) = | 0.536468     |
| Lowest Frequency =     | -44.4        |

SMD (MeOH)

|                           |              |
|---------------------------|--------------|
| HF SCF energy (TZ) =      | -1951.192335 |
| HF SCF energy (QZ) =      | -1951.285792 |
| Correlation energy (DZ) = | -5.602529    |
| Correlation energy (TZ) = | -6.895177    |
| DLPNO-CCSD(T1)/CBS =      | -1958.964469 |

\*xyz 0 1

|    |           |           |           |
|----|-----------|-----------|-----------|
| Ru | -0.275672 | 0.577613  | 0.713987  |
| C  | 2.093838  | -2.208877 | 0.344657  |
| O  | -0.646630 | -2.645265 | 1.837940  |
| C  | 1.699190  | -1.941101 | -0.971902 |
| C  | 3.446417  | -2.369993 | 0.637202  |
| H  | 1.326391  | -2.302844 | 1.116641  |

|    |           |           |           |
|----|-----------|-----------|-----------|
| N  | -0.551819 | -0.974922 | -0.753183 |
| Cl | -3.424686 | 2.105226  | 0.850733  |
| O  | -1.410214 | -0.549273 | 1.964176  |
| C  | -1.520041 | -1.824088 | 2.146323  |
| H  | -1.046451 | -4.220765 | 1.175002  |
| C  | 2.653069  | -1.874444 | -1.995113 |
| C  | 0.277548  | -1.778839 | -1.318740 |
| C  | 4.402695  | -2.249729 | -0.372518 |
| H  | 3.754977  | -2.584500 | 1.662420  |
| C  | -1.927153 | -1.119243 | -1.167685 |
| H  | -2.725561 | 2.934547  | -0.929762 |
| C  | -2.825602 | -2.252015 | 2.769772  |
| O  | -1.199518 | -5.029568 | 0.644157  |
| C  | 4.005630  | -2.003844 | -1.688488 |
| H  | 2.336625  | -1.694181 | -3.025535 |
| H  | -0.101355 | -2.403089 | -2.140953 |
| H  | 5.463258  | -2.360792 | -0.136414 |
| C  | -2.605353 | -0.030460 | -1.712008 |
| C  | -2.568081 | -2.350412 | -0.996077 |
| O  | -2.363683 | 3.330275  | -1.756198 |
| H  | -3.066333 | -1.608625 | 3.626449  |
| H  | -3.623323 | -2.122859 | 2.022117  |
| H  | -2.783944 | -3.302300 | 3.080732  |
| C  | 0.041397  | -5.379312 | 0.069006  |
| H  | 4.752327  | -1.919872 | -2.480483 |
| C  | -3.931989 | -0.184087 | -2.110839 |
| H  | -2.116542 | 0.938025  | -1.826316 |
| C  | -3.897917 | -2.486458 | -1.388793 |
| H  | -2.038511 | -3.189102 | -0.535819 |
| C  | -3.376376 | 4.139095  | -2.319056 |
| H  | -0.536046 | 3.191441  | -0.596875 |
| H  | -0.286077 | 2.538651  | -2.746640 |
| H  | -0.069655 | -6.357575 | -0.422450 |
| H  | 0.845243  | -5.465822 | 0.822774  |
| H  | 0.373519  | -4.653293 | -0.696899 |
| C  | -4.581104 | -1.406897 | -1.950769 |
| H  | -4.459177 | 0.669382  | -2.541601 |
| H  | -4.401617 | -3.445608 | -1.251614 |
| H  | -3.672124 | 4.963839  | -1.645937 |
| H  | -4.281157 | 3.556826  | -2.569969 |
| H  | -2.984360 | 4.578054  | -3.247948 |
| C  | 0.104476  | 2.621925  | 0.081925  |
| C  | 0.490700  | 1.772406  | -2.890977 |
| H  | -5.623197 | -1.518577 | -2.257412 |
| C  | 1.170940  | 1.850093  | -0.424503 |
| C  | -0.214562 | 2.618651  | 1.475760  |
| C  | 1.621012  | 1.900400  | -1.872132 |
| H  | 0.009433  | 0.786265  | -2.828212 |
| H  | 0.898901  | 1.881633  | -3.906528 |
| C  | 1.832769  | 0.991811  | 0.494333  |
| C  | 0.461353  | 1.793906  | 2.392338  |
| H  | -1.097405 | 3.167200  | 1.803023  |
| C  | 2.417623  | 3.196167  | -2.073976 |
| H  | 2.310522  | 1.052457  | -2.013638 |
| C  | 1.470224  | 0.930485  | 1.864164  |
| H  | 2.598611  | 0.311739  | 0.124290  |
| C  | 0.050852  | 1.710331  | 3.831308  |
| H  | 3.232226  | 3.287176  | -1.339474 |
| H  | 1.762686  | 4.076575  | -1.971207 |
| H  | 2.859937  | 3.214137  | -3.080962 |
| H  | 1.946615  | 0.187495  | 2.506448  |
| H  | 0.128055  | 0.679122  | 4.200405  |
| H  | 0.718064  | 2.342913  | 4.435972  |
| H  | -0.979501 | 2.063150  | 3.966570  |

\*

-----

**TS(C<sup>1</sup>-D<sup>+</sup>)•S<sub>3</sub>**

CPCM (MeOH)  
 wB97X-D3 SCF (DZ) = -2076.583094  
 G (1 atm) = -2076.020169  
 qh G-E (1 mol/L) = 0.583911  
 qh G-E (24.56 mol/L) = 0.586934  
 Lowest Frequency = -37.83

SMD (MeOH)

HF SCF energy (TZ) = -2066.289473  
 HF SCF energy (QZ) = -2066.390462  
 Correlation energy (DZ) = -5.982357  
 Correlation energy (TZ) = -7.367186  
 DLPNO-CCSD(T1)/CBS = -2074.597283

\*xyz 0 1

|    |           |           |           |
|----|-----------|-----------|-----------|
| Ru | -0.373339 | 0.364424  | 0.598364  |
| C  | 1.249886  | 0.981405  | 1.841887  |
| C  | 1.647027  | 1.092726  | 0.484407  |
| C  | 0.094896  | 1.659803  | 2.326007  |
| H  | 1.793826  | 0.306767  | 2.502487  |
| C  | -0.667812 | 2.368142  | 1.372822  |
| C  | -0.277409 | 2.472065  | 0.004162  |
| C  | 0.908924  | 1.867669  | -0.455144 |
| Cl | -3.788095 | 1.256846  | 0.723854  |
| C  | 2.090909  | -2.103646 | 0.346862  |
| N  | -0.468245 | -1.056953 | -1.025201 |
| O  | 0.231422  | -1.624570 | 3.245194  |
| O  | -1.194261 | -1.187154 | 1.572845  |
| H  | 2.517146  | 0.532386  | 0.141388  |
| C  | -0.353809 | 1.547660  | 3.753569  |
| H  | -1.640877 | 2.765361  | 1.664258  |
| H  | -0.959488 | 2.964671  | -0.693033 |
| C  | 1.425935  | 2.011318  | -1.873423 |
| H  | -3.129250 | 2.487800  | -0.939586 |
| H  | -5.418999 | 1.145664  | -0.777367 |
| H  | -3.560292 | 0.624817  | 2.782361  |
| C  | 1.840306  | -1.877321 | -1.012298 |
| C  | 3.404453  | -2.185395 | 0.802826  |
| H  | 1.263105  | -2.207911 | 1.050831  |
| C  | -1.788634 | -1.274574 | -1.559930 |
| C  | 0.464528  | -1.786016 | -1.526952 |
| C  | -0.878985 | -1.716185 | 2.730558  |
| H  | -1.435510 | 1.356153  | 3.810169  |
| H  | -0.136816 | 2.493265  | 4.272966  |
| H  | 0.174373  | 0.733483  | 4.263274  |
| C  | 0.355533  | 1.948423  | -2.959980 |
| C  | 2.217607  | 3.325653  | -1.938435 |
| H  | 2.131982  | 1.180689  | -2.037425 |
| O  | -2.844226 | 3.017553  | -1.711740 |
| O  | -6.216934 | 1.267844  | -1.326077 |
| O  | -3.554388 | 0.471724  | 3.748426  |
| C  | 2.906512  | -1.771695 | -1.914259 |
| C  | 4.466946  | -2.031006 | -0.089215 |
| H  | 3.596999  | -2.363619 | 1.862740  |
| C  | -2.517652 | -0.211777 | -2.090051 |
| C  | -2.339841 | -2.558666 | -1.510670 |
| H  | 0.223007  | -2.397920 | -2.408143 |
| C  | -2.020435 | -2.464024 | 3.374768  |
| H  | 0.815683  | 2.148030  | -3.938810 |
| H  | -0.442930 | 2.690284  | -2.804999 |
| H  | -0.107060 | 0.952896  | -3.006536 |
| H  | 2.999522  | 3.363356  | -1.164800 |
| H  | 1.548514  | 4.189073  | -1.792259 |
| H  | 2.700979  | 3.427737  | -2.921285 |

|   |           |           |           |
|---|-----------|-----------|-----------|
| C | -3.959083 | 3.789070  | -2.124588 |
| C | -7.138547 | 1.986942  | -0.532756 |
| C | -4.577542 | 1.280494  | 4.294451  |
| C | 4.217676  | -1.825100 | -1.447530 |
| H | 2.706211  | -1.620819 | -2.977861 |
| H | 5.495818  | -2.082357 | 0.273704  |
| C | -3.790793 | -0.444699 | -2.604746 |
| H | -2.114181 | 0.800574  | -2.094280 |
| C | -3.619417 | -2.778904 | -2.016000 |
| H | -1.771656 | -3.373893 | -1.057189 |
| H | -2.495500 | -3.134856 | 2.645690  |
| H | -2.770120 | -1.721785 | 3.690949  |
| H | -1.666954 | -3.032733 | 4.242874  |
| H | -4.161535 | 4.625821  | -1.431547 |
| H | -4.866642 | 3.167695  | -2.199922 |
| H | -3.732634 | 4.210366  | -3.114644 |
| H | -8.057719 | 2.124409  | -1.121536 |
| H | -7.403782 | 1.447468  | 0.395232  |
| H | -6.760842 | 2.987434  | -0.250088 |
| H | -5.573190 | 1.019002  | 3.892471  |
| H | -4.402475 | 2.355758  | 4.109356  |
| H | -4.593128 | 1.117628  | 5.381887  |
| H | 5.048199  | -1.713898 | -2.147381 |
| C | -4.345522 | -1.723068 | -2.568400 |
| H | -4.363644 | 0.389867  | -3.012491 |
| H | -4.050949 | -3.780931 | -1.970564 |
| H | -5.351062 | -1.893863 | -2.958451 |

\*

-----

**TS(C<sup>1</sup>-D<sup>+</sup>)\*S<sub>3</sub>P**

CPCM (MeOH)

|                        |              |
|------------------------|--------------|
| wB97X-D3 SCF (DZ) =    | -2076.586048 |
| G (1 atm) =            | -2076.022145 |
| qh G-E (1 mol/L) =     | 0.583555     |
| qh G-E (24.56 mol/L) = | 0.586578     |
| Lowest Frequency =     | -28.6        |

SMD (MeOH)

|                           |              |
|---------------------------|--------------|
| HF SCF energy (TZ) =      | -2066.290084 |
| HF SCF energy (QZ) =      | -2066.391786 |
| Correlation energy (DZ) = | -5.980447    |
| Correlation energy (TZ) = | -7.365565    |
| DLPNO-CCSD(T1)/CBS =      | -2074.597370 |

\*xyz 0 1

|    |           |           |           |
|----|-----------|-----------|-----------|
| Ru | -0.383218 | 0.497381  | 0.622392  |
| O  | 0.033877  | -1.436349 | 3.281777  |
| C  | 1.929700  | -2.155384 | 0.493373  |
| C  | -1.075084 | -1.533158 | 2.744141  |
| H  | 1.074599  | -2.196467 | 1.169827  |
| H  | 1.200865  | -2.677620 | 3.732106  |
| N  | -0.511948 | -0.961580 | -0.955273 |
| Cl | -3.788342 | 1.769063  | 0.757777  |
| O  | -1.373989 | -0.955313 | 1.619270  |
| C  | 1.743358  | -1.913867 | -0.873075 |
| C  | 3.213948  | -2.342930 | 0.998379  |
| C  | -2.198716 | -2.336045 | 3.344367  |
| O  | 1.848914  | -3.404803 | 3.806073  |
| C  | -1.830418 | -1.112069 | -1.514948 |
| C  | 0.393988  | -1.740957 | -1.431513 |
| H  | -3.039793 | 2.782699  | -0.975482 |
| H  | -3.534205 | 0.908062  | 2.721294  |
| C  | 2.846289  | -1.890143 | -1.736318 |
| C  | 4.315445  | -2.268543 | 0.144544  |
| H  | 3.329226  | -2.558471 | 2.062708  |

|   |           |           |           |
|---|-----------|-----------|-----------|
| H | -2.638309 | -2.998735 | 2.586493  |
| H | -2.972288 | -1.622152 | 3.666453  |
| H | -1.842690 | -2.918453 | 4.202004  |
| C | 1.205760  | -4.563891 | 3.320674  |
| C | -2.510277 | -0.004137 | -2.017371 |
| C | -2.432147 | -2.374922 | -1.517713 |
| H | 0.143244  | -2.341140 | -2.318039 |
| O | -2.651059 | 3.238725  | -1.752780 |
| O | -3.514311 | 0.661066  | 3.669135  |
| C | 4.131601  | -2.040564 | -1.221254 |
| H | 2.696253  | -1.728496 | -2.806551 |
| H | 5.323976  | -2.403116 | 0.541890  |
| H | 1.932012  | -5.390404 | 3.333422  |
| H | 0.342896  | -4.859882 | 3.946456  |
| H | 0.847060  | -4.445270 | 2.280571  |
| C | -3.782919 | -0.170298 | -2.560687 |
| H | -2.066623 | 0.991386  | -1.989529 |
| C | -3.707519 | -2.528888 | -2.055493 |
| H | -1.905967 | -3.226411 | -1.080491 |
| C | -3.636115 | 4.100484  | -2.287345 |
| C | -4.330137 | 1.593414  | 4.349502  |
| H | 4.992982  | -1.992564 | -1.890435 |
| C | -4.382970 | -1.428036 | -2.585162 |
| H | -4.308630 | 0.700813  | -2.956897 |
| H | -4.176671 | -3.514832 | -2.054030 |
| H | -3.960401 | 4.864154  | -1.558214 |
| H | -4.528291 | 3.547173  | -2.630768 |
| H | -3.198679 | 4.616677  | -3.153939 |
| H | -5.370559 | 1.585597  | 3.977130  |
| H | -3.942757 | 2.625637  | 4.267360  |
| H | -4.345108 | 1.317359  | 5.414054  |
| H | -5.383104 | -1.550528 | -3.006080 |
| C | 1.264370  | 1.017632  | 1.877830  |
| C | 1.682386  | 1.089595  | 0.524273  |
| C | 0.155512  | 1.781067  | 2.345780  |
| H | 1.756769  | 0.316155  | 2.550706  |
| C | 1.004310  | 1.898456  | -0.430945 |
| H | 2.515733  | 0.467489  | 0.196560  |
| C | -0.313411 | 1.715389  | 3.769928  |
| C | -0.551826 | 2.525627  | 1.380037  |
| C | 1.540366  | 1.989622  | -1.846482 |
| C | -0.146804 | 2.580243  | 0.011886  |
| H | -1.389262 | 1.488966  | 3.813063  |
| H | -0.138829 | 2.689065  | 4.251420  |
| H | 0.229187  | 0.940388  | 4.323066  |
| H | -1.501500 | 2.985995  | 1.655409  |
| C | 0.476030  | 1.980399  | -2.940819 |
| C | 2.416038  | 3.248964  | -1.922014 |
| H | 2.192453  | 1.112944  | -1.993750 |
| H | -0.796676 | 3.098779  | -0.697900 |
| H | 0.954955  | 2.138881  | -3.918161 |
| H | -0.275899 | 2.772024  | -2.800609 |
| H | -0.047885 | 1.015184  | -2.979697 |
| H | 3.193015  | 3.246179  | -1.142494 |
| H | 1.803488  | 4.155876  | -1.792400 |
| H | 2.912259  | 3.306292  | -2.902070 |

\*

**TS(C<sup>2</sup>-D<sup>+</sup>)**

CPCM (MeOH)  
M06 SCF (DZ) = -1496.944213  
G (1 atm) = -1496.491936  
qh-G (1 mol/L) = -1496.482980  
qh-G (24.56 mol/L) = -1496.479958  
Lowest Frequency = -62.48

**TS(C<sup>2</sup>-D<sup>+</sup>)**

CPCM (MeOH)  
wB97X-D3 SCF (DZ) = -1497.641295  
G (1 atm) = -1497.175965  
qh G-E (1 mol/L) = 0.478458  
qh G-E (24.56 mol/L) = 0.481481  
Lowest Frequency = -65.97

HF SCF energy (TZ) = -1488.731473  
 HF SCF energy (QZ) = -1488.823135  
 Correlation energy (DZ) = -5.380160  
 Correlation energy (TZ) = -6.588799  
 DLPNO-CCSD(T1)/CBS = -1496.145804

HF SCF energy (TZ) = -1488.734493  
 HF SCF energy (QZ) = -1488.825018  
 Correlation energy (DZ) = -5.380533  
 Correlation energy (TZ) = -6.588670  
 DLPNO-CCSD(T1)/CBS = -1496.146922

\*xyz 0 1

|    |           |           |           |
|----|-----------|-----------|-----------|
| Ru | -0.324584 | -0.629373 | -0.026229 |
| N  | -0.389555 | 1.512132  | 0.435690  |
| O  | 0.108804  | -0.742701 | 1.919602  |
| C  | -1.464891 | 2.227350  | 0.419776  |
| C  | 0.852169  | 2.186005  | 0.647889  |
| O  | 2.781985  | -1.533367 | 0.629104  |
| C  | 0.486130  | -1.835875 | 2.559736  |
| C  | -2.817703 | 1.681957  | 0.447718  |
| H  | -1.372817 | 3.325614  | 0.392936  |
| C  | 2.004138  | 1.717399  | 0.012781  |
| C  | 0.937276  | 3.287148  | 1.509863  |
| C  | 3.710968  | -1.055055 | -0.071289 |
| C  | 1.497072  | -1.548745 | 3.631839  |
| O  | 0.088454  | -2.962414 | 2.309014  |
| C  | -3.808689 | 2.261933  | -0.355805 |
| C  | -3.148109 | 0.622005  | 1.305624  |
| C  | 3.216244  | 2.375383  | 0.190668  |
| H  | 1.980020  | 0.823794  | -0.618184 |
| C  | 2.154182  | 3.938758  | 1.684672  |
| H  | 0.058929  | 3.615124  | 2.071815  |
| C  | 5.056234  | -0.860875 | 0.626698  |
| O  | 3.628948  | -0.697281 | -1.277255 |
| H  | 1.236793  | -0.644073 | 4.198735  |
| H  | 2.445609  | -1.361066 | 3.102755  |
| H  | 1.612650  | -2.408771 | 4.303905  |
| C  | -5.098876 | 1.744047  | -0.352039 |
| H  | -3.553684 | 3.108266  | -1.000295 |
| C  | -4.450179 | 0.133754  | 1.333349  |
| H  | -2.386282 | 0.208309  | 1.978279  |
| C  | 3.295279  | 3.493512  | 1.018638  |
| H  | 4.099223  | 1.987851  | -0.324617 |
| H  | 2.211808  | 4.793628  | 2.362672  |
| H  | 5.299599  | -1.728870 | 1.259116  |
| H  | 4.982171  | 0.012277  | 1.298283  |
| H  | 5.870605  | -0.677611 | -0.089913 |
| C  | -5.419911 | 0.680786  | 0.492655  |
| H  | -5.862647 | 2.179521  | -0.999956 |
| H  | -4.712237 | -0.676413 | 2.018213  |
| H  | 4.248943  | 4.006956  | 1.162716  |
| H  | -6.439245 | 0.287684  | 0.509095  |
| C  | -2.041364 | -1.248005 | -1.151556 |
| C  | -1.480205 | -2.422062 | -0.558096 |
| C  | -1.284034 | -0.406082 | -2.003320 |
| H  | -3.075105 | -0.979621 | -0.915733 |
| C  | -2.315536 | -3.285608 | 0.322625  |
| C  | -0.102093 | -2.665284 | -0.765120 |
| C  | 0.084724  | -0.654576 | -2.221847 |
| H  | -1.745419 | 0.511357  | -2.378059 |
| H  | -1.698512 | -3.767230 | 1.090639  |
| H  | -3.109152 | -2.699528 | 0.810683  |
| H  | -2.805686 | -4.058383 | -0.292721 |
| C  | 0.670177  | -1.771076 | -1.549822 |
| H  | 0.391373  | -3.460640 | -0.203836 |
| C  | 0.960706  | 0.214569  | -3.088727 |
| H  | 1.765520  | -1.838363 | -1.554844 |
| C  | 0.450169  | 1.633648  | -3.270452 |
| C  | 1.110606  | -0.485255 | -4.440457 |
| H  | 1.956569  | 0.226874  | -2.608282 |

SMD (MeOH)

HF SCF energy (TZ) = -1488.758242  
 HF SCF energy (QZ) = -1488.848357  
 Correlation energy (DZ) = -5.374209  
 Correlation energy (TZ) = -6.583285  
 DLPNO-CCSD(T1)/CBS = -1496.165302

\*xyz 0 1

|    |           |           |           |
|----|-----------|-----------|-----------|
| Ru | 0.306372  | -0.612800 | 0.037293  |
| O  | -0.119972 | -0.728573 | -1.908329 |
| C  | -0.502765 | -1.804407 | -2.570321 |
| C  | -1.535785 | -1.502536 | -3.626854 |
| O  | -0.095599 | -2.936847 | -2.352687 |
| C  | 2.059684  | -1.180624 | 1.119988  |
| C  | 1.288790  | -0.366070 | 1.986575  |
| C  | 1.522740  | -2.362385 | 0.524791  |
| C  | -0.067787 | -0.655464 | 2.227111  |
| C  | 2.376618  | -3.208403 | -0.369396 |
| C  | 0.157446  | -2.654847 | 0.758903  |
| C  | -0.957086 | 0.187183  | 3.119240  |
| C  | -0.626356 | -1.788021 | 1.560350  |
| C  | -0.488474 | 1.631671  | 3.278637  |
| C  | -1.064709 | -0.515056 | 4.480430  |
| H  | -1.276108 | -0.593167 | -4.184867 |
| H  | -2.476657 | -1.319547 | -3.085587 |
| H  | -1.656900 | -2.353493 | -4.307662 |
| H  | 3.081560  | -0.885868 | 0.879326  |
| H  | 1.728899  | 0.558052  | 2.362749  |
| H  | 3.159619  | -2.604714 | -0.847580 |
| H  | 2.867944  | -3.978959 | 0.244749  |
| H  | 1.765723  | -3.687579 | -1.141144 |
| H  | -0.321563 | -3.468951 | 0.216384  |
| H  | -1.956604 | 0.167794  | 2.655529  |
| H  | -1.712055 | -1.903841 | 1.590450  |
| H  | -0.340886 | 2.128479  | 2.307631  |
| H  | 0.456421  | 1.693131  | 3.841749  |
| H  | -1.242340 | 2.204868  | 3.837778  |
| H  | -1.460710 | -1.536659 | 4.375814  |
| H  | -0.079356 | -0.576899 | 4.970489  |
| H  | -1.741339 | 0.046966  | 5.141426  |
| N  | 0.394924  | 1.503776  | -0.449264 |
| C  | 1.461207  | 2.222788  | -0.461812 |
| C  | -0.854299 | 2.170216  | -0.687209 |
| C  | 2.821252  | 1.660762  | -0.449143 |
| C  | -1.993302 | 1.746404  | -0.002470 |
| C  | -0.946461 | 3.208519  | -1.621008 |
| C  | 3.765692  | 2.148140  | 0.461888  |
| C  | 3.181816  | 0.670216  | -1.372622 |
| C  | -3.206460 | 2.400113  | -0.200495 |
| C  | -2.165368 | 3.853621  | -1.818965 |
| C  | 5.048377  | 1.605841  | 0.485702  |
| C  | 4.476533  | 0.157034  | -1.366841 |
| C  | -3.295916 | 3.460726  | -1.101396 |
| C  | 5.404638  | 0.612844  | -0.429167 |
| H  | 1.366837  | 3.316745  | -0.504843 |
| H  | -1.958720 | 0.893900  | 0.678232  |
| H  | -0.074463 | 3.495341  | -2.212455 |
| H  | 3.485662  | 2.933835  | 1.167479  |
| H  | 2.447825  | 0.311614  | -2.098061 |

|   |           |           |           |
|---|-----------|-----------|-----------|
| H | 0.274182  | 2.143710  | -2.308711 |
| H | -0.489677 | 1.657258  | -3.849031 |
| H | 1.187393  | 2.227028  | -3.833117 |
| H | 0.132189  | -0.579698 | -4.943319 |
| H | 1.776063  | 0.095452  | -5.098406 |
| H | 1.536973  | -1.495374 | -4.330895 |

\*

-----

**cis-TS(D<sup>+</sup>-E<sup>+</sup>)1**

CPCM (MeOH)  
M06 SCF (DZ) = -1268.423417  
G (1 atm) = -1268.015545  
qh-G (1 mol/L) = -1268.007284  
qh-G (24.56 mol/L) = -1268.004262  
Lowest Frequency = -83.52

HF SCF energy (TZ) = -1261.304965  
HF SCF energy (QZ) = -1261.379607  
Correlation energy (DZ) = -4.690606  
Correlation energy (TZ) = -5.726332  
DLPNO-CCSD(T1)/CBS = -1267.733641

PBE0+D3BJ (ATZ) = -1268.358470  
M06-2X (ATZ) = -1269.066768  
wB97M-V (ATZ) = -1269.137265  
B2GP-PLYP (ATZ) = -1268.390678  
B2K-PLYP (ATZ) = -1268.223812  
PWPB95 (ATZ) = -1268.728763  
PWPB95+D3BJ (ATZ) = -1268.770053  
PWPB95+D4 (ATZ) = -1268.784186

\*xyz 0 1

|    |           |           |           |
|----|-----------|-----------|-----------|
| Ru | 0.012285  | -0.754495 | 0.118315  |
| C  | -0.524890 | -1.586517 | 1.995378  |
| C  | 1.505992  | 0.443484  | -1.823074 |
| C  | -0.212192 | -2.694798 | 1.146381  |
| C  | 0.418009  | -0.542837 | 2.223423  |
| H  | -1.524677 | -1.514575 | 2.432317  |
| O  | -0.515410 | -1.944139 | -2.441606 |
| H  | 0.646370  | -0.248817 | -1.947161 |
| N  | -0.680175 | 1.267260  | -0.161439 |
| O  | -1.815634 | -1.124736 | -0.837433 |
| C  | 2.736887  | 0.042794  | -2.333538 |
| C  | 1.322221  | 1.760966  | -1.373165 |
| C  | -1.230552 | -3.743348 | 0.863621  |
| C  | 1.028030  | -2.666221 | 0.477643  |
| C  | 1.685465  | -0.530234 | 1.583851  |
| H  | 0.122109  | 0.304815  | 2.845927  |
| C  | -1.639425 | -1.718625 | -1.973735 |
| C  | -2.000196 | 1.660468  | 0.215628  |
| C  | 0.049240  | 2.133466  | -0.784410 |
| C  | 3.786367  | 0.958749  | -2.399210 |
| H  | 2.866717  | -0.979405 | -2.698408 |
| C  | 2.368699  | 2.684557  | -1.475438 |
| H  | -1.044962 | -4.230981 | -0.103835 |
| H  | -1.184991 | -4.515022 | 1.648787  |
| H  | -2.244544 | -3.318558 | 0.866407  |
| C  | 1.938191  | -1.590068 | 0.679535  |

|   |           |           |           |
|---|-----------|-----------|-----------|
| H | -4.082708 | 2.059065  | 0.354160  |
| H | -2.232267 | 4.661375  | -2.550507 |
| H | 5.776316  | 1.965497  | 1.215501  |
| H | 4.759115  | -0.607317 | -2.093291 |
| H | -4.249651 | 3.968491  | -1.258865 |
| H | 6.414623  | 0.197608  | -0.417053 |
| O | -2.792465 | -1.431806 | -0.582711 |
| C | -3.741612 | -1.006487 | 0.128508  |
| C | -5.093727 | -0.827105 | -0.570399 |
| O | -3.669785 | -0.693000 | 1.347653  |
| H | -5.316377 | -1.691930 | -1.212605 |
| H | -5.037634 | 0.059047  | -1.223776 |
| H | -5.907053 | -0.676493 | 0.152420  |

\*

-----

**cis-TS(D<sup>+</sup>-E<sup>+</sup>)1**

CPCM (MeOH)  
wB97X-D3 SCF (DZ) = -1269.057300  
G (1 atm) = -1268.636115  
qh G-E (1 mol/L) = 0.432212  
qh G-E (24.56 mol/L) = 0.435234  
Lowest Frequency = -64.30

HF SCF energy (TZ) = -1261.309240  
HF SCF energy (QZ) = -1261.382685  
Correlation energy (DZ) = -4.689597  
Correlation energy (TZ) = -5.724750  
DLPNO-CCSD(T1)/CBS = -1267.734441

PBE0+D3BJ (ATZ) = -1268.358835  
M06-2X (ATZ) = -1269.082173  
wB97M-V (ATZ) = -1269.144367  
B2GP-PLYP (ATZ) = -1268.407975  
B2K-PLYP (ATZ) = -1268.244041  
PWPB95 (ATZ) = -1268.740983  
PWPB95+D3BJ (ATZ) = -1268.781821  
PWPB95+D4 (ATZ) = -1268.796103

SMD (MeOH)

HF SCF energy (TZ) = -1261.327972  
HF SCF energy (QZ) = -1261.401370  
Correlation energy (DZ) = -4.684747  
Correlation energy (TZ) = -5.721239  
DLPNO-CCSD(T1)/CBS = -1267.750385

\*xyz 0 1

|    |           |           |           |
|----|-----------|-----------|-----------|
| Ru | -0.007006 | 0.769426  | -0.147251 |
| O  | -0.714402 | 1.874600  | 2.512830  |
| O  | -1.842437 | 1.143806  | 0.741326  |
| C  | -1.784522 | 1.644123  | 1.933268  |
| C  | -3.122130 | 1.942759  | 2.561932  |
| C  | 1.911617  | 1.630130  | -0.682140 |
| C  | 0.963559  | 2.691064  | -0.592922 |
| C  | 1.726931  | 0.507516  | -1.521852 |
| C  | -0.244335 | 2.632764  | -1.314447 |
| C  | 2.748554  | -0.586890 | -1.620694 |
| C  | 0.487313  | 0.433020  | -2.209169 |
| C  | -1.318253 | 3.693650  | -1.226565 |
| C  | -0.493633 | 1.455858  | -2.090938 |
| C  | -1.174010 | 4.627741  | -0.028632 |
| C  | -1.320419 | 4.474479  | -2.549768 |
| H  | -3.775668 | 1.062246  | 2.489643  |
| H  | -3.603304 | 2.761134  | 2.006014  |
| H  | -2.997494 | 2.238147  | 3.609813  |
| H  | 2.787527  | 1.662049  | -0.031602 |



|   |           |           |           |
|---|-----------|-----------|-----------|
| H | 1.244541  | -3.413319 | -0.288943 |
| C | 2.707219  | 0.563814  | 1.777075  |
| C | -2.902053 | -2.137727 | -2.669684 |
| C | -2.426558 | 1.524945  | 1.536884  |
| C | -2.868255 | 2.164800  | -0.755305 |
| H | -0.298266 | 3.174612  | -0.867187 |
| C | 3.600512  | 2.276657  | -1.976169 |
| H | 4.753081  | 0.648994  | -2.802332 |
| H | 2.217641  | 3.713434  | -1.137606 |
| H | 2.838975  | -1.546283 | 0.059343  |
| C | 2.131538  | 1.853436  | 2.339409  |
| C | 3.822252  | 0.032650  | 2.676826  |
| H | 3.137830  | 0.772695  | 0.778533  |
| H | -3.632587 | -1.316173 | -2.668611 |
| H | -3.353624 | -2.974290 | -2.113214 |
| H | -2.692820 | -2.460674 | -3.696675 |
| C | -3.714441 | 1.915409  | 1.888234  |
| H | -1.740792 | 1.144708  | 2.296001  |
| C | -4.158263 | 2.545340  | -0.397068 |
| H | -2.534025 | 2.228754  | -1.794491 |
| H | 4.423631  | 2.991079  | -2.041399 |
| H | 1.272603  | 2.226883  | 1.757633  |
| H | 1.805795  | 1.725446  | 3.385942  |
| H | 2.904083  | 2.637312  | 2.336519  |
| H | 4.293112  | -0.870402 | 2.257759  |
| H | 3.424463  | -0.221332 | 3.674218  |
| H | 4.603514  | 0.797166  | 2.807047  |
| C | -4.583891 | 2.423274  | 0.923707  |
| H | -4.039194 | 1.823021  | 2.926978  |
| H | -4.836992 | 2.932233  | -1.160575 |
| H | -5.597398 | 2.720047  | 1.202743  |

\*

-----

|   |           |           |           |
|---|-----------|-----------|-----------|
| H | 1.152312  | 3.500160  | 0.110987  |
| H | 3.373551  | -0.624294 | -0.718294 |
| H | 3.402034  | -0.393571 | -2.484496 |
| H | 2.267188  | -1.563565 | -1.765282 |
| H | 0.252903  | -0.467260 | -2.780075 |
| H | -2.276506 | 3.155853  | -1.140097 |
| H | -1.465196 | 1.325139  | -2.571001 |
| H | -1.103493 | 4.075697  | 0.920007  |
| H | -0.282174 | 5.267525  | -0.121407 |
| H | -2.050858 | 5.288562  | 0.026292  |
| H | -1.479443 | 3.811582  | -3.413392 |
| H | -0.363140 | 5.000562  | -2.691633 |
| H | -2.126387 | 5.222398  | -2.540809 |
| C | 1.471148  | -0.347119 | 1.857553  |
| C | 2.687603  | 0.091424  | 2.375548  |
| C | 1.329088  | -1.670749 | 1.414086  |
| N | -0.667738 | -1.245935 | 0.169934  |
| C | 3.762109  | -0.794774 | 2.456207  |
| C | 2.398177  | -2.565548 | 1.530396  |
| C | 0.061065  | -2.086688 | 0.816784  |
| C | -1.989340 | -1.664211 | -0.205456 |
| C | 3.615129  | -2.120791 | 2.040701  |
| C | -2.382620 | -1.653000 | -1.543341 |
| C | -2.885195 | -2.055892 | 0.791222  |
| C | -3.673760 | -2.050278 | -1.883086 |
| C | -4.176661 | -2.447858 | 0.443089  |
| C | -4.574302 | -2.445887 | -0.893212 |
| H | 0.596477  | 0.330327  | 1.950732  |
| H | 2.788606  | 1.120072  | 2.726696  |
| H | 4.716902  | -0.453119 | 2.860843  |
| H | 2.280519  | -3.598965 | 1.197499  |
| H | -0.275353 | -3.125019 | 0.933260  |
| H | 4.456179  | -2.812282 | 2.117069  |
| H | -1.679773 | -1.357861 | -2.321664 |
| H | -2.573498 | -2.031343 | 1.837527  |
| H | -3.975444 | -2.051301 | -2.932343 |
| H | -4.876393 | -2.748751 | 1.225305  |
| H | -5.587420 | -2.749309 | -1.164509 |

\*

-----

#### TS(D<sup>+</sup>-E<sup>+</sup>)1•S<sup>P</sup>

CPCM (MeOH)

wB97X-D3 SCF (DZ) = -1384.773345

G (1 atm) = -1384.302956

qh G-E (1 mol/L) = 0.483321

qh G-E (24.56 mol/L) = 0.486344

Lowest Frequency = -66.67

SMD (MeOH)

HF SCF energy (TZ) = -1376.424166

HF SCF energy (QZ) = -1376.505864

Correlation energy (DZ) = -5.064472

Correlation energy (TZ) = -6.192576

DLPNO-CCSD(T1)/CBS = -1383.382248

\*xyz 0 1

|    |           |           |          |
|----|-----------|-----------|----------|
| Ru | -0.144996 | 0.945499  | 0.071897 |
| C  | 1.451035  | 0.162659  | 2.136904 |
| O  | -0.858109 | 2.198040  | 2.685635 |
| C  | 2.647729  | 0.731298  | 2.564806 |
| C  | 1.379382  | -1.210993 | 1.861564 |
| H  | 0.538498  | 0.793067  | 2.178642 |
| N  | -0.664736 | -1.051509 | 0.634897 |
| O  | -1.980740 | 1.392721  | 0.948911 |
| C  | -1.936038 | 1.925745  | 2.116811 |

|   |           |           |           |
|---|-----------|-----------|-----------|
| H | -0.963319 | 1.738769  | 4.433297  |
| C | 3.777110  | -0.074549 | 2.716238  |
| H | 2.691620  | 1.798428  | 2.790651  |
| C | 2.504067  | -2.020865 | 2.048318  |
| C | 0.134881  | -1.772710 | 1.336271  |
| C | -1.901403 | -1.649523 | 0.204371  |
| C | -3.254180 | 2.226969  | 2.777636  |
| O | -1.177356 | 1.246525  | 5.249569  |
| C | 3.703518  | -1.446364 | 2.463166  |
| H | 4.718446  | 0.366642  | 3.049996  |
| H | 2.442532  | -3.092087 | 1.844387  |
| H | -0.113526 | -2.822495 | 1.539349  |
| C | -1.936526 | -2.378659 | -0.983928 |
| C | -3.049184 | -1.489767 | 0.980620  |
| H | -3.179020 | 1.977866  | 3.844454  |
| H | -3.443172 | 3.307940  | 2.693611  |
| H | -4.077965 | 1.680699  | 2.304327  |
| C | -1.022597 | -0.121791 | 4.938868  |
| H | 4.587709  | -2.073054 | 2.593376  |
| C | -3.139884 | -2.944584 | -1.403830 |
| H | -1.023556 | -2.512425 | -1.567746 |
| C | -4.246047 | -2.060879 | 0.552362  |
| H | -2.997420 | -0.924433 | 1.911405  |
| H | 0.034043  | -0.400592 | 4.763417  |
| H | -1.603072 | -0.422037 | 4.044945  |
| H | -1.390452 | -0.711905 | 5.791606  |
| C | -4.296027 | -2.783113 | -0.640684 |
| H | -3.168445 | -3.519110 | -2.331860 |
| H | -5.145389 | -1.940776 | 1.159920  |
| H | -5.237047 | -3.226343 | -0.972874 |
| C | -0.806800 | 1.681667  | -1.803092 |
| C | -0.045672 | 0.505601  | -2.013129 |
| C | -0.263300 | 2.810791  | -1.103558 |
| H | -1.852452 | 1.696015  | -2.115859 |
| C | 1.293411  | 0.385970  | -1.524650 |
| H | -0.524544 | -0.350763 | -2.490857 |
| C | -1.134965 | 4.028519  | -0.879248 |
| C | 1.033792  | 2.671737  | -0.580857 |
| C | 2.084352  | -0.874607 | -1.712840 |
| C | 1.793213  | 1.475393  | -0.787193 |
| C | -0.702663 | 4.893229  | 0.302475  |
| C | -1.175823 | 4.837312  | -2.183495 |
| H | -2.148974 | 3.645074  | -0.677673 |
| H | 1.449080  | 3.441646  | 0.069396  |
| H | 1.437687  | -1.760400 | -1.648000 |
| H | 2.546485  | -0.864221 | -2.711267 |
| H | 2.881722  | -0.953795 | -0.962275 |
| H | 2.759470  | 1.378727  | -0.289165 |
| H | -0.632717 | 4.309695  | 1.232507  |
| H | 0.271171  | 5.374131  | 0.117700  |
| H | -1.440313 | 5.693906  | 0.457076  |
| H | -1.534093 | 4.229993  | -3.028350 |
| H | -0.173466 | 5.219177  | -2.434911 |
| H | -1.852714 | 5.696645  | -2.070039 |

\*

-----  
**TS(D<sup>+</sup>-E<sup>+</sup>)1•S<sub>2</sub><sup>kp</sup>**

CPCM (MeOH)

wB97X-D3 SCF (DZ) = -1500.489575

G (1 atm) = -1499.970338

qh G-E (1 mol/L) = 0.534052

qh G-E (24.56 mol/L) = 0.537075

Lowest Frequency = -59.53

SMD (MeOH)

HF SCF energy (TZ) = -1491.519672  
 HF SCF energy (QZ) = -1491.609319  
 Correlation energy (DZ) = -5.447107  
 Correlation energy (TZ) = -6.667124  
 DLPNO-CCSD(T1)/CBS = -1499.016354

\*xyz 0 1

|    |           |           |           |
|----|-----------|-----------|-----------|
| Ru | -0.088462 | 0.962792  | 0.072379  |
| C  | -0.703142 | 1.583167  | -1.861204 |
| C  | 0.182776  | 0.483257  | -1.993827 |
| C  | -0.306894 | 2.776585  | -1.170095 |
| H  | -1.732830 | 1.490867  | -2.214203 |
| C  | 1.832139  | 1.650920  | -0.679490 |
| C  | 0.963019  | 2.780208  | -0.566102 |
| C  | 1.486957  | 0.498728  | -1.417390 |
| C  | 1.522419  | 0.043935  | 2.152241  |
| H  | 0.646395  | 0.720238  | 2.195074  |
| O  | -1.922575 | 1.413722  | 0.963164  |
| N  | -0.654613 | -1.028732 | 0.604014  |
| H  | -0.178340 | -0.425984 | -2.476143 |
| C  | -1.307962 | 3.902868  | -1.030456 |
| H  | 2.764867  | 1.654371  | -0.112228 |
| H  | 1.265422  | 3.605405  | 0.078098  |
| C  | 2.402116  | -0.686017 | -1.516315 |
| C  | 2.746355  | 0.532945  | 2.600421  |
| C  | 1.376634  | -1.315045 | 1.838372  |
| O  | -0.777120 | 2.145855  | 2.707317  |
| C  | -1.866181 | 1.911318  | 2.151617  |
| H  | -3.246097 | 1.365504  | -0.266701 |
| C  | -1.933118 | -1.547246 | 0.191892  |
| C  | 0.105686  | -1.797738 | 1.298449  |
| C  | -1.038452 | 4.833762  | 0.148649  |
| C  | -1.348006 | 4.672687  | -2.358407 |
| H  | -2.286822 | 3.417453  | -0.887661 |
| H  | 1.831564  | -1.624962 | -1.512128 |
| H  | 2.962955  | -0.631471 | -2.461284 |
| H  | 3.121975  | -0.697052 | -0.687080 |
| C  | 3.827915  | -0.338568 | 2.737096  |
| H  | 2.848443  | 1.589413  | 2.855601  |
| C  | 2.452824  | -2.191706 | 2.012053  |
| H  | -0.871730 | 1.727903  | 4.478785  |
| C  | -3.177315 | 2.210596  | 2.822480  |
| O  | -3.730695 | 1.389475  | -1.113539 |
| C  | -2.069307 | -2.140687 | -1.061991 |
| C  | -3.025598 | -1.432780 | 1.051452  |
| H  | -0.199998 | -2.835007 | 1.487808  |
| H  | -0.944199 | 4.283072  | 1.096419  |
| H  | -0.118598 | 5.421578  | -0.000140 |
| H  | -1.870827 | 5.544838  | 0.250637  |
| H  | -1.594879 | 4.012103  | -3.203213 |
| H  | -0.375287 | 5.147028  | -2.564737 |
| H  | -2.112085 | 5.462197  | -2.308915 |
| C  | 3.679329  | -1.697397 | 2.449339  |
| H  | 4.789829  | 0.040731  | 3.087904  |
| H  | 2.332791  | -3.252272 | 1.780464  |
| O  | -1.092897 | 1.246273  | 5.298364  |
| H  | -3.992837 | 1.622976  | 2.384613  |
| H  | -3.396713 | 3.280468  | 2.685377  |
| H  | -3.081821 | 2.012000  | 3.897608  |
| C  | -5.109928 | 1.511727  | -0.830333 |
| C  | -3.319497 | -2.609106 | -1.464282 |
| H  | -1.199206 | -2.249970 | -1.711724 |
| C  | -4.269749 | -1.907129 | 0.641374  |
| H  | -2.896051 | -0.973535 | 2.032210  |
| H  | 4.525572  | -2.376239 | 2.569703  |
| C  | -0.932734 | -0.125667 | 5.005417  |

|   |           |           |           |
|---|-----------|-----------|-----------|
| H | -5.342382 | 2.440799  | -0.279184 |
| H | -5.651016 | 1.537975  | -1.787289 |
| H | -5.490878 | 0.655764  | -0.244679 |
| C | -4.421648 | -2.487794 | -0.618320 |
| H | -3.427405 | -3.077043 | -2.444851 |
| H | -5.125711 | -1.819820 | 1.313718  |
| H | -1.311210 | -0.705952 | 5.860157  |
| H | -1.500697 | -0.436233 | 4.107261  |
| H | 0.126485  | -0.404567 | 4.846928  |
| H | -5.399702 | -2.852798 | -0.938270 |

\*

**trans-TS(D<sup>+</sup>-E<sup>+</sup>)1**

CPCM (MeOH)  
M06 SCF (DZ) = -1268.423984  
G (1 atm) = -1268.018208  
qh-G (1 mol/L) = -1268.008804  
qh-G (24.56 mol/L) = -1268.005781  
Lowest Frequency = -94.81

HF SCF energy (TZ) = -1261.306201  
HF SCF energy (QZ) = -1261.380774  
Correlation energy (DZ) = -4.690084  
Correlation energy (TZ) = -5.725573  
DLPNO-CCSD(T1)/CBS = -1267.733889

\*xyz 1 1

|    |           |           |           |
|----|-----------|-----------|-----------|
| Ru | -0.168044 | -0.692074 | -0.182576 |
| C  | 0.882952  | -2.055540 | -1.422859 |
| C  | 1.774813  | -1.549469 | -0.438696 |
| C  | -0.325613 | -2.726792 | -1.052304 |
| H  | 1.094050  | -1.876109 | -2.480943 |
| C  | 0.256859  | -2.237695 | 1.304968  |
| C  | -0.629837 | -2.774184 | 0.320554  |
| C  | 1.492330  | -1.654644 | 0.955557  |
| C  | -1.775077 | 0.752558  | 1.654388  |
| N  | 0.508519  | 1.329147  | -0.045838 |
| H  | -0.920091 | 0.104510  | 1.893621  |
| O  | -2.940116 | -0.785872 | -0.721666 |
| O  | -1.236263 | 0.175499  | -1.770930 |
| H  | 2.662837  | -0.995715 | -0.760065 |
| C  | -1.274660 | -3.214525 | -2.091616 |
| H  | -0.075301 | -2.224803 | 2.346729  |
| H  | -1.614933 | -3.127812 | 0.634189  |
| C  | 2.466437  | -1.094270 | 1.960594  |
| C  | -1.560284 | 1.967287  | 0.985423  |
| C  | -3.033724 | 0.433598  | 2.154270  |
| C  | 1.788709  | 1.711152  | -0.552327 |
| C  | -0.269596 | 2.262068  | 0.394725  |
| C  | -2.498456 | -0.099731 | -1.648498 |
| H  | -2.304362 | -3.232369 | -1.711390 |
| H  | -1.233707 | -2.579462 | -2.989088 |
| H  | -0.993451 | -4.236203 | -2.393315 |
| C  | 1.815390  | -0.492519 | 3.194578  |
| C  | 3.445115  | -2.206018 | 2.337480  |
| H  | 3.031993  | -0.298085 | 1.439768  |
| C  | -2.617086 | 2.879080  | 0.850343  |
| C  | -4.083880 | 1.329465  | 1.987233  |
| H  | -3.186218 | -0.511524 | 2.679560  |
| C  | 2.708876  | 2.353049  | 0.277031  |
| C  | 2.111241  | 1.414189  | -1.878270 |
| H  | 0.038510  | 3.313912  | 0.291698  |
| C  | -3.378377 | 0.479650  | -2.719440 |
| H  | 2.588031  | -0.055886 | 3.845384  |
| H  | 1.104089  | 0.311542  | 2.941358  |

**trans-TS(D<sup>+</sup>-E<sup>+</sup>)1**

CPCM (MeOH)  
wB97X-D3 SCF (DZ) = -1269.057905  
G (1 atm) = -1268.637701  
qh G-E (1 mol/L) = 0.432175  
qh G-E (24.56 mol/L) = 0.435198  
Lowest Frequency = -98.64

HF SCF energy (TZ) = -1261.309813  
HF SCF energy (QZ) = -1261.383199  
Correlation energy (DZ) = -4.689597  
Correlation energy (TZ) = -5.724750  
DLPNO-CCSD(T1)/CBS = -1267.734937

SMD (MeOH)

HF SCF energy (TZ) = -1261.331451  
HF SCF energy (QZ) = -1261.404674  
Correlation energy (DZ) = -4.684880  
Correlation energy (TZ) = -5.720875  
DLPNO-CCSD(T1)/CBS = -1267.752980

\*xyz 1 1

|    |           |           |           |
|----|-----------|-----------|-----------|
| Ru | -0.185278 | -0.683953 | -0.205516 |
| C  | 0.767322  | -2.122151 | -1.434096 |
| C  | 1.712579  | -1.598378 | -0.515787 |
| C  | -0.443546 | -2.736063 | -0.981379 |
| C  | 0.265946  | -2.176050 | 1.327988  |
| C  | -0.684477 | -2.715568 | 0.403691  |
| C  | 1.496663  | -1.647001 | 0.896418  |
| C  | -1.452006 | -3.258128 | -1.959208 |
| C  | 2.553092  | -1.108195 | 1.839951  |
| C  | 1.995512  | -0.358119 | 3.047712  |
| C  | 3.445448  | -2.283438 | 2.263773  |
| H  | 0.938232  | -1.989670 | -2.503713 |
| H  | 2.597802  | -1.090148 | -0.902429 |
| H  | -0.011315 | -2.126836 | 2.382222  |
| H  | -1.657625 | -3.033613 | 0.780396  |
| H  | -2.456831 | -3.264755 | -1.521425 |
| H  | -1.460457 | -2.647363 | -2.871953 |
| H  | -1.178658 | -4.286684 | -2.239208 |
| H  | 3.169670  | -0.407540 | 1.253444  |
| H  | 2.827334  | 0.018437  | 3.660213  |
| H  | 1.385868  | 0.506324  | 2.743778  |
| H  | 1.381629  | -1.007508 | 3.691103  |
| H  | 2.868624  | -3.018877 | 2.847102  |
| H  | 3.873762  | -2.797163 | 1.389952  |
| H  | 4.274035  | -1.921711 | 2.889986  |
| C  | -1.724346 | 0.766017  | 1.778550  |
| N  | 0.513235  | 1.322939  | -0.032606 |
| C  | -1.593233 | 1.889163  | 0.949503  |
| C  | -2.978061 | 0.400121  | 2.270730  |
| C  | 1.812234  | 1.724030  | -0.489234 |
| C  | -0.284493 | 2.238391  | 0.391967  |

|   |           |           |           |
|---|-----------|-----------|-----------|
| H | 1.284226  | -1.251803 | 3.792983  |
| H | 2.916048  | -3.028576 | 2.848665  |
| H | 3.948596  | -2.623426 | 1.451258  |
| H | 4.216762  | -1.819682 | 3.020731  |
| C | -3.874807 | 2.549792  | 1.336838  |
| H | -2.448529 | 3.831027  | 0.340307  |
| H | -5.074307 | 1.086914  | 2.378765  |
| C | 3.965384  | 2.688798  | -0.224584 |
| H | 2.444695  | 2.566777  | 1.316878  |
| C | 3.363784  | 1.763227  | -2.371102 |
| H | 1.368068  | 0.924449  | -2.513899 |
| H | -3.096425 | 0.059658  | -3.697099 |
| H | -3.227352 | 1.567724  | -2.780516 |
| H | -4.433700 | 0.260205  | -2.516379 |
| H | -4.703550 | 3.250615  | 1.215981  |
| C | 4.294940  | 2.394034  | -1.544708 |
| H | 4.690652  | 3.181586  | 0.426810  |
| H | 3.614777  | 1.541011  | -3.410706 |
| H | 5.281312  | 2.656380  | -1.933765 |

\*

-----

|   |           |           |           |
|---|-----------|-----------|-----------|
| C | -2.719900 | 2.664100  | 0.638833  |
| C | -4.097300 | 1.152679  | 1.932751  |
| C | 2.697811  | 2.349533  | 0.387703  |
| C | 2.179190  | 1.461872  | -1.810736 |
| C | -3.966929 | 2.283698  | 1.118868  |
| C | 3.966201  | 2.713921  | -0.065481 |
| C | 3.443472  | 1.838208  | -2.255264 |
| C | 4.340599  | 2.459658  | -1.383493 |
| H | -0.832453 | 0.239548  | 2.127374  |
| H | -3.068907 | -0.468523 | 2.925123  |
| H | 0.006773  | 3.294561  | 0.319138  |
| H | -2.615017 | 3.547209  | 0.004922  |
| H | -5.080531 | 0.868431  | 2.313083  |
| H | 2.400184  | 2.532753  | 1.422463  |
| H | 1.469514  | 0.973959  | -2.482469 |
| H | -4.847985 | 2.875447  | 0.863234  |
| H | 4.664037  | 3.196230  | 0.621706  |
| H | 3.729400  | 1.641953  | -3.290395 |
| H | 5.334021  | 2.746316  | -1.734082 |
| O | -2.999719 | -0.647428 | -0.766131 |
| O | -1.213089 | 0.179916  | -1.795670 |
| C | -2.496262 | 0.004485  | -1.685468 |
| C | -3.325156 | 0.670392  | -2.756290 |
| H | -3.016396 | 0.306783  | -3.746618 |
| H | -3.147660 | 1.755272  | -2.730993 |
| H | -4.390313 | 0.466632  | -2.597949 |

\*

-----

#### cis-TS(D<sup>+</sup>-E<sup>+</sup>)<sub>2</sub>

CPCM (MeOH)

|                      |              |
|----------------------|--------------|
| M06 SCF (DZ) =       | -1268.417869 |
| G (1 atm) =          | -1268.012919 |
| qh-G (1 mol/L) =     | -1268.005188 |
| qh-G (24.56 mol/L) = | -1268.002165 |
| Lowest Frequency =   | -1224.78     |

|                           |              |
|---------------------------|--------------|
| HF SCF energy (TZ) =      | -1261.272053 |
| HF SCF energy (QZ) =      | -1261.346291 |
| Correlation energy (DZ) = | -4.714451    |
| Correlation energy (TZ) = | -5.751333    |
| DLPNO-CCSD(T1)/CBS =      | -1267.725880 |

|                     |              |
|---------------------|--------------|
| PBE0+D3BJ (ATZ) =   | -1268.356554 |
| M06-2X (ATZ) =      | -1269.053588 |
| wB97M-V (ATZ) =     | -1269.129404 |
| B2GP-PLYP (ATZ) =   | -1268.389963 |
| B2K-PLYP (ATZ) =    | -1268.224294 |
| PWPB95 (ATZ) =      | -1268.724225 |
| PWPB95+D3BJ (ATZ) = | -1268.766020 |
| PWPB95+D4 (ATZ) =   | -1268.780050 |

\*xyz 0 1

|    |           |           |           |
|----|-----------|-----------|-----------|
| Ru | -0.072231 | 0.550217  | 0.504588  |
| C  | 0.641460  | 1.038844  | 2.560473  |
| C  | -0.664513 | 1.582115  | 2.352756  |
| C  | 0.843247  | -0.332777 | 2.292149  |
| C  | 1.780525  | 1.922218  | 2.934209  |
| C  | -1.718744 | 0.754580  | 1.917444  |
| C  | -0.234354 | -1.157762 | 1.850771  |
| C  | -1.539318 | -0.645865 | 1.677765  |
| C  | -1.528477 | 0.635435  | -1.199163 |
| N  | 0.816377  | -0.677145 | -0.996124 |
| H  | -0.647249 | 1.565262  | -1.320690 |
| O  | 1.284604  | 2.051101  | -0.117052 |
| H  | -0.827004 | 2.656107  | 2.465318  |

#### cis-TS(D<sup>+</sup>-E<sup>+</sup>)<sub>2</sub>

CPCM (MeOH)

|                        |              |
|------------------------|--------------|
| wB97X-D3 SCF (DZ) =    | -1269.049411 |
| G (1 atm) =            | -1268.632403 |
| qh G-E (1 mol/L) =     | 0.427438     |
| qh G-E (24.56 mol/L) = | 0.430461     |
| Lowest Frequency =     | -1123.81     |

|                           |              |
|---------------------------|--------------|
| HF SCF energy (TZ) =      | -1261.275612 |
| HF SCF energy (QZ) =      | -1261.348299 |
| Correlation energy (DZ) = | -4.714641    |
| Correlation energy (TZ) = | -5.751095    |
| DLPNO-CCSD(T1)/CBS =      | -1267.726932 |

|                     |              |
|---------------------|--------------|
| PBE0+D3BJ (ATZ) =   | -1268.356979 |
| M06-2X (ATZ) =      | -1269.064659 |
| wB97M-V (ATZ) =     | -1269.135493 |
| B2GP-PLYP (ATZ) =   | -1268.402852 |
| B2K-PLYP (ATZ) =    | -1268.239081 |
| PWPB95 (ATZ) =      | -1268.733062 |
| PWPB95+D3BJ (ATZ) = | -1268.774368 |
| PWPB95+D4 (ATZ) =   | -1268.788632 |

SMD (MeOH)

|                           |              |
|---------------------------|--------------|
| HF SCF energy (TZ) =      | -1261.291123 |
| HF SCF energy (QZ) =      | -1261.363790 |
| Correlation energy (DZ) = | -4.711281    |
| Correlation energy (TZ) = | -5.748204    |
| DLPNO-CCSD(T1)/CBS =      | -1267.739801 |

\*xyz 0 1

|    |           |           |           |
|----|-----------|-----------|-----------|
| Ru | -0.346987 | -0.102092 | -0.279959 |
| C  | -1.277513 | 0.594517  | -2.126542 |
| C  | 0.018998  | 0.140979  | -2.437612 |
| C  | -2.213301 | -0.228478 | -1.423722 |
| C  | 1.015757  | 1.025059  | -3.127977 |
| C  | 0.364721  | -1.195728 | -2.037002 |

|       |           |           |           |   |           |           |           |
|-------|-----------|-----------|-----------|---|-----------|-----------|-----------|
| H     | 1.851916  | -0.750551 | 2.350061  | C | -1.863116 | -1.527660 | -1.012043 |
| H     | 1.833583  | 2.002470  | 4.032115  | C | -0.551380 | -2.007234 | -1.353776 |
| H     | 1.648237  | 2.933991  | 2.526895  | C | -2.783696 | -2.412539 | -0.195808 |
| H     | 2.736468  | 1.514155  | 2.575694  | C | -3.822908 | -1.639615 | 0.614070  |
| H     | -2.690797 | 1.206353  | 1.698414  | C | -3.443852 | -3.432344 | -1.132971 |
| H     | -0.017899 | -2.193583 | 1.575576  | H | -1.546626 | 1.627044  | -2.353964 |
| C     | -2.713410 | -1.493122 | 1.254269  | H | -3.176331 | 0.194267  | -1.139508 |
| C     | -2.815952 | 1.187287  | -1.219248 | H | 2.040630  | 0.779822  | -2.819152 |
| C     | -1.278012 | -0.476514 | -2.047836 | H | 0.944434  | 0.874733  | -4.215701 |
| C     | 2.095797  | -1.278972 | -0.832903 | H | 0.818312  | 2.083350  | -2.911423 |
| C     | 0.050751  | -1.037522 | -1.976718 | H | 1.384033  | -1.555703 | -2.192110 |
| O     | 0.115907  | 2.545243  | -1.944549 | H | -0.223222 | -2.979149 | -0.980411 |
| C     | 1.108155  | 2.709271  | -1.195009 | H | -2.136391 | -2.961486 | 0.507834  |
| C     | -3.598239 | -1.736889 | 2.476583  | H | -3.359344 | -0.866624 | 1.246229  |
| C     | -2.323813 | -2.811813 | 0.606946  | H | -4.565299 | -1.150427 | -0.036208 |
| H     | -3.291375 | -0.895182 | 0.524242  | H | -4.369167 | -2.332954 | 1.269910  |
| C     | -3.822112 | 0.630565  | -2.009838 | H | -2.694511 | -4.022156 | -1.682141 |
| H     | -3.028892 | 2.086067  | -0.631773 | H | -4.086682 | -2.923691 | -1.868934 |
| C     | -2.276273 | -1.021160 | -2.857217 | H | -4.068699 | -4.127358 | -0.553051 |
| C     | 3.203928  | -0.478416 | -0.539402 | C | -0.748680 | 1.951408  | 0.495488  |
| C     | 2.230193  | -2.668109 | -0.916337 | C | -1.923190 | 2.710429  | 0.406107  |
| H     | 0.404217  | -1.757907 | -2.728314 | C | 0.481815  | 2.652461  | 0.523572  |
| C     | 2.168891  | 3.700612  | -1.556201 | N | 1.584908  | 0.588182  | 0.266121  |
| H     | -4.487369 | -2.321074 | 2.193175  | C | -1.874769 | 4.102691  | 0.317039  |
| H     | -3.046237 | -2.306635 | 3.243672  | C | 0.535411  | 4.046648  | 0.457183  |
| H     | -3.941115 | -0.795284 | 2.933579  | C | 1.690728  | 1.843599  | 0.541362  |
| H     | -3.222524 | -3.316768 | 0.221106  | C | 2.761565  | -0.225182 | 0.221751  |
| H     | -1.627319 | -2.680039 | -0.237281 | C | -0.649452 | 4.771482  | 0.345031  |
| H     | -1.856033 | -3.495621 | 1.335900  | C | 2.763299  | -1.458747 | 0.878281  |
| C     | -3.555669 | -0.471843 | -2.823544 | C | 3.881817  | 0.195348  | -0.500274 |
| H     | -4.821828 | 1.071642  | -2.004931 | C | 3.901461  | -2.258791 | 0.828265  |
| H     | -2.055277 | -1.881992 | -3.494422 | C | 5.013941  | -0.617747 | -0.548638 |
| C     | 4.448580  | -1.073054 | -0.363815 | C | 5.028270  | -1.843056 | 0.115908  |
| H     | 3.074472  | 0.603635  | -0.459268 | H | -2.893198 | 2.206572  | 0.428877  |
| C     | 3.480712  | -3.251957 | -0.731074 | H | -2.803280 | 4.672716  | 0.240226  |
| H     | 1.348344  | -3.289942 | -1.096940 | H | 1.500455  | 4.558238  | 0.474067  |
| H     | 2.410805  | 4.327290  | -0.687108 | H | 2.666276  | 2.287699  | 0.773872  |
| H     | 3.083570  | 3.150569  | -1.827088 | H | -0.618415 | 5.860933  | 0.282925  |
| H     | 1.855392  | 4.321436  | -2.403009 | H | 1.875794  | -1.771382 | 1.429519  |
| H     | -4.347635 | -0.896461 | -3.443982 | H | 3.861582  | 1.146220  | -1.037636 |
| C     | 4.591876  | -2.457667 | -0.459687 | H | 3.906435  | -3.217357 | 1.351211  |
| H     | 5.317182  | -0.446621 | -0.147745 | H | 5.886095  | -0.289684 | -1.117748 |
| H     | 3.581088  | -4.338196 | -0.789381 | H | 5.916106  | -2.477345 | 0.076017  |
| H     | 5.571354  | -2.918310 | -0.312238 | H | -0.978076 | 1.010371  | 1.402593  |
| *     |           |           |           | O | -0.302687 | -1.185137 | 1.536085  |
| ----- |           |           |           | O | -1.270152 | 0.494717  | 2.611827  |
|       |           |           |           | C | -0.828142 | -0.685203 | 2.581524  |
|       |           |           |           | C | -0.953082 | -1.558373 | 3.793652  |
|       |           |           |           | H | -0.129366 | -2.280426 | 3.834770  |
|       |           |           |           | H | -1.898545 | -2.115977 | 3.708161  |
|       |           |           |           | H | -0.988080 | -0.950127 | 4.704465  |
|       |           |           |           | * |           |           |           |
| ----- |           |           |           |   |           |           |           |

**TS(D<sup>+</sup>-E<sup>+</sup>)2•S<sup>P</sup>**

CPCM (MeOH)  
wB97X-D3 SCF (DZ) = -1384.762812  
G (1 atm) = -1384.297313  
qh G-E (1 mol/L) = 0.478354  
qh G-E (24.56 mol/L) = 0.481377  
Lowest Frequency = -1193.32

SMD (MeOH)  
HF SCF energy (TZ) = -1376.385505  
HF SCF energy (QZ) = -1376.466790  
Correlation energy (DZ) = -5.092514

Correlation energy (TZ) = -6.221497  
DLPNO-CCSD(T1)/CBS = -1383.372484

\*xyz 0 1

|    |           |           |           |
|----|-----------|-----------|-----------|
| Ru | -0.617299 | -0.089665 | -0.313486 |
| C  | -1.259723 | 0.445724  | -2.331159 |
| C  | 0.416923  | -1.255237 | -1.857910 |
| C  | -2.262874 | -0.379208 | -1.729272 |
| C  | 0.086568  | 0.036697  | -2.397709 |
| H  | -1.530261 | 1.446240  | -2.671767 |
| C  | -0.567443 | -2.065797 | -1.277272 |
| C  | -1.323077 | 1.930714  | 0.283109  |
| N  | 1.144121  | 0.830758  | 0.445531  |
| H  | -1.539176 | 1.031846  | 1.255929  |
| O  | -0.729648 | -1.101721 | 1.547661  |
| H  | 1.460671  | -1.574701 | -1.827587 |
| C  | -1.934993 | -1.632086 | -1.178853 |
| H  | -3.275155 | 0.012584  | -1.633610 |
| C  | 1.147198  | 0.923226  | -2.981049 |
| H  | -0.268511 | -2.996056 | -0.790180 |
| C  | -2.553896 | 2.546935  | 0.019994  |
| C  | -0.190826 | 2.770626  | 0.426002  |
| C  | 2.394895  | 0.154757  | 0.609690  |
| C  | 1.082180  | 2.103599  | 0.647371  |
| O  | -1.853535 | 0.575476  | 2.454081  |
| C  | -1.333506 | -0.582162 | 2.528808  |
| C  | -2.939759 | -2.512168 | -0.462887 |
| H  | 2.120324  | 0.739493  | -2.506678 |
| H  | 1.248631  | 0.706983  | -4.055326 |
| H  | 0.882801  | 1.982832  | -2.865442 |
| C  | -2.647372 | 3.932507  | -0.125695 |
| H  | -3.459697 | 1.938619  | -0.048475 |
| C  | -0.280939 | 4.158665  | 0.301628  |
| C  | 2.429422  | -1.061799 | 1.296730  |
| C  | 3.563559  | 0.689296  | 0.059780  |
| H  | 1.965873  | 2.665311  | 0.974347  |
| H  | -1.333658 | 1.571364  | 4.022708  |
| C  | -1.446537 | -1.344536 | 3.811203  |
| C  | -4.092930 | -1.738329 | 0.173881  |
| C  | -3.446829 | -3.579284 | -1.441479 |
| H  | -2.381686 | -3.018782 | 0.341720  |
| C  | -1.515899 | 4.738269  | 0.015768  |
| H  | -3.616377 | 4.389971  | -0.337421 |
| H  | 0.612711  | 4.777372  | 0.411907  |
| C  | 3.642255  | -1.728437 | 1.449824  |
| H  | 1.506880  | -1.468814 | 1.712034  |
| C  | 4.771431  | 0.009888  | 0.214020  |
| H  | 3.525598  | 1.623383  | -0.505165 |
| O  | -0.734548 | 1.794636  | 4.753671  |
| H  | -0.810878 | -2.235726 | 3.795079  |
| H  | -2.497543 | -1.639386 | 3.946459  |
| H  | -1.173361 | -0.676937 | 4.639494  |
| H  | -3.731838 | -0.936372 | 0.836338  |
| H  | -4.752143 | -1.287622 | -0.584820 |
| H  | -4.707435 | -2.423592 | 0.775503  |
| H  | -2.617082 | -4.165057 | -1.865367 |
| H  | -3.997133 | -3.112118 | -2.273958 |
| H  | -4.126885 | -4.273899 | -0.926584 |
| H  | -1.598397 | 5.821520  | -0.091528 |
| C  | 4.815195  | -1.197015 | 0.910249  |
| H  | 3.669162  | -2.673823 | 1.995640  |
| H  | 5.681085  | 0.427156  | -0.222619 |
| C  | 0.547322  | 1.968187  | 4.184333  |
| H  | 5.762076  | -1.728170 | 1.026864  |
| H  | 0.584905  | 2.828140  | 3.489774  |
| H  | 0.896068  | 1.069917  | 3.638973  |

H 1.257026 2.161258 5.001630  
\*

-----  
**TS(D<sup>+</sup>-E<sup>+</sup>)2•S<sup>r</sup>**

CPCM (MeOH)

wB97X-D3 SCF (DZ) = -1384.747642  
G (1 atm) = -1384.281202  
qh G-E (1 mol/L) = 0.477161  
qh G-E (24.56 mol/L) = 0.480184  
Lowest Frequency = -1297.25

SMD (MeOH)

HF SCF energy (TZ) = -1376.359408  
HF SCF energy (QZ) = -1376.440157  
Correlation energy (DZ) = -5.098837  
Correlation energy (TZ) = -6.227880  
DLPNO-CCSD(T1)/CBS = -1383.352107

\*xyz 0 1

|    |           |           |           |
|----|-----------|-----------|-----------|
| Ru | -0.491555 | -0.230169 | -0.212095 |
| C  | -1.054499 | 0.299451  | -2.249813 |
| C  | 0.458344  | -1.535706 | -1.700775 |
| C  | -2.130578 | -0.422766 | -1.652957 |
| C  | 0.248660  | -0.241158 | -2.282958 |
| H  | -1.229020 | 1.307232  | -2.628452 |
| C  | -0.610284 | -2.229620 | -1.111850 |
| C  | -1.939011 | -1.691648 | -1.072787 |
| C  | -1.289827 | 1.771819  | 0.394128  |
| H  | -1.629530 | 0.890230  | 1.362646  |
| N  | 1.273007  | 0.803929  | 0.434251  |
| O  | -0.148128 | -1.208080 | 1.658563  |
| H  | 1.466142  | -1.950817 | -1.650721 |
| H  | -3.108456 | 0.053946  | -1.592855 |
| C  | 1.386583  | 0.529049  | -2.883242 |
| H  | -0.404709 | -3.165319 | -0.586677 |
| C  | -3.066585 | -2.495591 | -0.457606 |
| C  | -2.516962 | 2.366412  | 0.057433  |
| C  | -0.190991 | 2.648929  | 0.578209  |
| O  | -2.168931 | 0.560530  | 2.502589  |
| C  | 2.595513  | 0.249917  | 0.452452  |
| C  | 1.120429  | 2.045235  | 0.746886  |
| C  | -0.824134 | -2.046739 | 2.352846  |
| H  | 2.347124  | 0.231573  | -2.443896 |
| H  | 1.425430  | 0.315306  | -3.962265 |
| H  | 1.244855  | 1.610204  | -2.752272 |
| C  | -4.212156 | -1.634178 | 0.066807  |
| C  | -3.555411 | -3.520645 | -1.489365 |
| H  | -2.635860 | -3.040511 | 0.396244  |
| C  | -2.645860 | 3.748732  | -0.093600 |
| H  | -3.405953 | 1.740398  | -0.055605 |
| C  | -0.317126 | 4.034834  | 0.458330  |
| C  | -3.351827 | 1.242508  | 2.914220  |
| H  | -2.270274 | -0.456608 | 2.520380  |
| C  | 2.807911  | -1.038682 | 0.950265  |
| C  | 3.667029  | 0.985246  | -0.067446 |
| H  | 1.971736  | 2.648511  | 1.085660  |
| C  | -0.038641 | -3.201530 | 2.923716  |
| O  | -2.049160 | -1.948026 | 2.582845  |
| H  | -3.844015 | -0.863708 | 0.759164  |
| H  | -4.762398 | -1.139738 | -0.749553 |
| H  | -4.929451 | -2.264023 | 0.612626  |
| H  | -2.735889 | -4.170749 | -1.831951 |
| H  | -3.982108 | -3.014639 | -2.370453 |
| H  | -4.335510 | -4.159344 | -1.048983 |
| C  | -1.551135 | 4.586388  | 0.117528  |



|   |           |           |           |
|---|-----------|-----------|-----------|
| H | -3.615676 | 4.174585  | -0.360168 |
| H | 0.555948  | 4.675803  | 0.602885  |
| H | -4.225850 | 0.931207  | 2.321851  |
| H | -3.185240 | 2.319357  | 2.779318  |
| H | -3.533181 | 1.037714  | 3.978747  |
| C | 4.093860  | -1.573285 | 0.950597  |
| H | 1.958995  | -1.595878 | 1.345167  |
| C | 4.949602  | 0.439545  | -0.064434 |
| H | 3.495383  | 1.972377  | -0.502081 |
| H | -0.648643 | -3.784342 | 3.623000  |
| H | 0.292259  | -3.846213 | 2.095359  |
| H | 0.862362  | -2.824540 | 3.427187  |
| H | -1.657148 | 5.667817  | 0.012821  |
| C | 5.168494  | -0.838691 | 0.447087  |
| H | 4.255274  | -2.576670 | 1.350456  |
| H | 5.778883  | 1.017746  | -0.477122 |
| H | 6.173569  | -1.265554 | 0.445521  |

\*

-----

**TS(D<sup>+</sup>-E<sup>+</sup>)2•S<sub>2</sub><sup>RP</sup>**

CPCM (MeOH)

|                        |              |
|------------------------|--------------|
| wB97X-D3 SCF (DZ) =    | -1500.476528 |
| G (1 atm) =            | -1499.961655 |
| qh G-E (1 mol/L) =     | 0.529629     |
| qh G-E (24.56 mol/L) = | 0.532652     |
| Lowest Frequency =     | -1226.26     |

SMD (MeOH)

|                           |              |
|---------------------------|--------------|
| HF SCF energy (TZ) =      | -1491.480146 |
| HF SCF energy (QZ) =      | -1491.569592 |
| Correlation energy (DZ) = | -5.474460    |
| Correlation energy (TZ) = | -6.694312    |
| DLPNO-CCSD(T1)/CBS =      | -1499.003659 |

\*xyz 0 1

|    |           |           |           |
|----|-----------|-----------|-----------|
| Ru | -0.599916 | -0.083853 | -0.319226 |
| C  | -1.283568 | 0.425085  | -2.325453 |
| C  | 0.470142  | -1.201592 | -1.875826 |
| C  | -2.246797 | -0.444433 | -1.721853 |
| C  | 0.080235  | 0.077670  | -2.404591 |
| H  | -1.598977 | 1.415132  | -2.658198 |
| C  | -0.470537 | -2.059797 | -1.292708 |
| C  | -1.304484 | 1.938579  | 0.249990  |
| N  | 1.158459  | 0.840811  | 0.444897  |
| H  | -1.515308 | 1.063232  | 1.255826  |
| O  | -0.741960 | -1.073388 | 1.569494  |
| H  | 1.527964  | -1.471996 | -1.850600 |
| C  | -1.854175 | -1.682712 | -1.180935 |
| H  | -3.275145 | -0.099551 | -1.617460 |
| C  | 1.095129  | 1.015515  | -2.989692 |
| H  | -0.130416 | -2.968594 | -0.789728 |
| C  | -2.534253 | 2.551474  | -0.025621 |
| C  | -0.175234 | 2.781379  | 0.400947  |
| C  | 2.410089  | 0.165814  | 0.608996  |
| C  | 1.095893  | 2.115581  | 0.636270  |
| O  | -1.795701 | 0.649754  | 2.462201  |
| C  | -1.305135 | -0.515186 | 2.559517  |
| H  | -0.225317 | -2.876498 | 1.566846  |
| C  | -2.806173 | -2.611372 | -0.454552 |
| H  | 2.075127  | 0.884760  | -2.511557 |
| H  | 1.211164  | 0.801405  | -4.062860 |
| H  | 0.775855  | 2.060395  | -2.878333 |
| C  | -2.628766 | 3.936552  | -0.176203 |
| H  | -3.437823 | 1.940761  | -0.102259 |
| C  | -0.266353 | 4.168846  | 0.271995  |

|   |           |           |           |
|---|-----------|-----------|-----------|
| C | 2.442777  | -1.066579 | 1.266595  |
| C | 3.582732  | 0.712188  | 0.078709  |
| H | 1.977796  | 2.680225  | 0.962718  |
| H | -1.273419 | 1.698615  | 4.016973  |
| C | -1.403102 | -1.241180 | 3.862578  |
| O | 0.187198  | -3.723161 | 1.320693  |
| C | -4.002505 | -1.902198 | 0.175721  |
| C | -3.246153 | -3.719821 | -1.419358 |
| H | -2.216626 | -3.077435 | 0.350917  |
| C | -1.500075 | 4.744840  | -0.026713 |
| H | -3.596495 | 4.391810  | -0.398292 |
| H | 0.624877  | 4.789800  | 0.388820  |
| C | 3.653640  | -1.737987 | 1.410386  |
| H | 1.523060  | -1.494844 | 1.662219  |
| C | 4.790052  | 0.030470  | 0.226594  |
| H | 3.549081  | 1.656657  | -0.468912 |
| O | -0.670276 | 1.909748  | 4.747193  |
| H | -0.713150 | -2.091093 | 3.892079  |
| H | -2.435786 | -1.602973 | 3.976819  |
| H | -1.193004 | -0.534558 | 4.675843  |
| C | -0.425846 | -4.760421 | 2.064311  |
| H | -3.689633 | -1.070213 | 0.825475  |
| H | -4.689856 | -1.502717 | -0.586721 |
| H | -4.571534 | -2.615478 | 0.789340  |
| H | -2.381206 | -4.259058 | -1.834550 |
| H | -3.824069 | -3.299817 | -2.258182 |
| H | -3.881663 | -4.448069 | -0.894130 |
| H | -1.583888 | 5.827600  | -0.137810 |
| C | 4.830408  | -1.193040 | 0.893740  |
| H | 3.672260  | -2.699402 | 1.927832  |
| H | 5.702072  | 0.458127  | -0.194803 |
| C | 0.619243  | 2.035893  | 4.181872  |
| H | -1.508645 | -4.837396 | 1.857388  |
| H | -0.288354 | -4.629932 | 3.152127  |
| H | 0.047344  | -5.707506 | 1.769203  |
| H | 5.776650  | -1.726962 | 1.002703  |
| H | 1.330300  | 2.216032  | 5.000643  |
| H | 0.942066  | 1.120954  | 3.648663  |
| H | 0.686601  | 2.886143  | 3.477860  |

\*

-----

**TS(D<sup>+</sup>-E<sup>+</sup>)2•S<sub>2</sub><sup>r</sup>**

CPCM (MeOH)

|                        |              |
|------------------------|--------------|
| wB97X-D3 SCF (DZ) =    | -1500.458310 |
| G (1 atm) =            | -1499.944212 |
| qh G-E (1 mol/L) =     | 0.527485     |
| qh G-E (24.56 mol/L) = | 0.530508     |
| Lowest Frequency =     | -1256.33     |

SMD (MeOH)

|                           |              |
|---------------------------|--------------|
| HF SCF energy (TZ) =      | -1491.451114 |
| HF SCF energy (QZ) =      | -1491.540059 |
| Correlation energy (DZ) = | -5.485464    |
| Correlation energy (TZ) = | -6.706328    |
| DLPNO-CCSD(T1)/CBS =      | -1498.986582 |

\*xyz 0 1

|    |           |           |           |
|----|-----------|-----------|-----------|
| Ru | -0.619365 | -0.153497 | -0.134521 |
| C  | -1.180211 | 0.375855  | -2.163770 |
| C  | 0.490602  | -1.316614 | -1.627933 |
| C  | -2.201706 | -0.467049 | -1.625220 |
| C  | 0.172393  | -0.023565 | -2.168813 |
| H  | -1.442794 | 1.374717  | -2.513970 |
| C  | -0.515043 | -2.132115 | -1.094334 |
| C  | -1.892787 | -1.722899 | -1.072981 |

|   |           |           |           |
|---|-----------|-----------|-----------|
| C | -1.423574 | 1.845319  | 0.410620  |
| H | -1.854155 | 0.975102  | 1.370156  |
| N | 1.099340  | 0.837890  | 0.662765  |
| O | -0.428960 | -1.183069 | 1.736351  |
| H | 1.533463  | -1.630540 | -1.557097 |
| H | -3.223728 | -0.092111 | -1.584004 |
| C | 1.248016  | 0.882180  | -2.691290 |
| H | -0.231477 | -3.059494 | -0.591912 |
| C | -2.938790 | -2.653243 | -0.491351 |
| C | -2.607197 | 2.462018  | -0.028031 |
| C | -0.340156 | 2.702476  | 0.726769  |
| O | -2.430235 | 0.690243  | 2.489013  |
| C | 2.406645  | 0.259571  | 0.766229  |
| C | 0.936984  | 2.067937  | 1.012410  |
| C | -1.148142 | -1.954195 | 2.455159  |
| H | 2.202118  | 0.702331  | -2.178685 |
| H | 1.396261  | 0.683894  | -3.763514 |
| H | 0.967179  | 1.936829  | -2.570461 |
| C | -4.209069 | -1.941175 | -0.036444 |
| C | -3.244507 | -3.747720 | -1.522920 |
| H | -2.481589 | -3.133091 | 0.388683  |
| C | -2.706658 | 3.849286  | -0.151827 |
| H | -3.484956 | 1.849038  | -0.250354 |
| C | -0.438390 | 4.091249  | 0.631372  |
| C | -3.664086 | 1.359232  | 2.767026  |
| H | -2.521018 | -0.350405 | 2.546787  |
| H | -0.835594 | 1.298436  | 3.420482  |
| C | 2.560723  | -1.056495 | 1.212464  |
| C | 3.527759  | 0.998375  | 0.371995  |
| H | 1.760661  | 2.641169  | 1.452884  |
| C | -0.438483 | -3.136291 | 3.064117  |
| O | -2.365717 | -1.767667 | 2.693594  |
| H | -3.980757 | -1.123107 | 0.661410  |
| H | -4.774119 | -1.532458 | -0.888822 |
| H | -4.865032 | -2.653936 | 0.483720  |
| H | -2.336075 | -4.296934 | -1.813454 |
| H | -3.687932 | -3.311731 | -2.432557 |
| H | -3.960453 | -4.471006 | -1.105233 |
| C | -1.628580 | 4.666345  | 0.187497  |
| H | -3.640531 | 4.294357  | -0.501844 |
| H | 0.422161  | 4.717602  | 0.878132  |
| H | -4.456487 | 1.021311  | 2.083164  |
| H | -3.502551 | 2.437691  | 2.642685  |
| H | -3.951161 | 1.151494  | 3.806665  |
| O | -0.011417 | 1.702754  | 3.738241  |
| C | 3.834175  | -1.613683 | 1.290909  |
| H | 1.675584  | -1.619061 | 1.507323  |
| C | 4.798576  | 0.430393  | 0.452471  |
| H | 3.406563  | 2.008634  | -0.024575 |
| H | -1.100528 | -3.690137 | 3.738852  |
| H | -0.089808 | -3.798117 | 2.257641  |
| H | 0.449185  | -2.784558 | 3.608920  |
| H | -1.712935 | 5.751383  | 0.101952  |
| C | 0.788814  | 0.671452  | 4.284132  |
| C | 4.957356  | -0.874505 | 0.915686  |
| H | 3.947336  | -2.638137 | 1.651984  |
| H | 5.666846  | 1.012976  | 0.137849  |
| H | 1.062169  | -0.083786 | 3.527641  |
| H | 0.289579  | 0.155999  | 5.124984  |
| H | 1.712247  | 1.130642  | 4.666221  |
| H | 5.952858  | -1.319061 | 0.975677  |

\*

*trans*-TS(D<sup>+</sup>-E)2  
CPCM (MeOH)

*trans*-TS(D<sup>+</sup>-E)2  
CPCM (MeOH)

M06 SCF (DZ) = -1496.947906  
 G (1 atm) = -1496.501420  
 qh-G (1 mol/L) = -1496.492080  
 qh-G (24.56 mol/L) = -1496.489058  
 Lowest Frequency = -1519.6507

HF SCF energy (TZ) = -1488.697333  
 HF SCF energy (QZ) = -1488.788123  
 Correlation energy (DZ) = -5.416970  
 Correlation energy (TZ) = -6.626930  
 DLPNO-CCSD(T1)/CBS = -1496.149432

\*xyz 0 1

|    |           |           |           |
|----|-----------|-----------|-----------|
| Ru | 0.512068  | -0.214553 | -0.374000 |
| C  | 0.313716  | 1.968200  | 0.165029  |
| N  | -1.169233 | -0.136446 | 0.915511  |
| C  | 1.338215  | 2.903144  | -0.054602 |
| C  | -0.330533 | 1.992233  | 1.426813  |
| H  | -0.537290 | 1.849279  | -0.777179 |
| O  | 1.635044  | -0.079061 | 1.410124  |
| C  | -2.184843 | -1.130829 | 0.998395  |
| C  | -1.293763 | 0.935956  | 1.631777  |
| C  | 1.698487  | 3.815771  | 0.932961  |
| H  | 1.846811  | 2.933882  | -1.024218 |
| C  | -0.000525 | 2.922294  | 2.410881  |
| O  | -1.533301 | 2.144954  | -1.722899 |
| C  | 1.823273  | -1.086442 | 2.201375  |
| C  | -3.513499 | -0.777125 | 0.744812  |
| C  | -1.839091 | -2.450576 | 1.298356  |
| H  | -2.088306 | 1.017070  | 2.386363  |
| C  | 1.026383  | 3.828344  | 2.159958  |
| H  | 2.495711  | 4.540001  | 0.746229  |
| H  | -0.518934 | 2.917396  | 3.373951  |
| C  | -2.697462 | 2.383803  | -1.228602 |
| C  | 2.766151  | -0.757875 | 3.338125  |
| O  | 1.333459  | -2.211360 | 2.083396  |
| C  | -4.498855 | -1.762323 | 0.782141  |
| H  | -3.744189 | 0.263398  | 0.491931  |
| C  | -2.835706 | -3.421218 | 1.337196  |
| H  | -0.790312 | -2.678010 | 1.518147  |
| H  | 1.310217  | 4.554507  | 2.925810  |
| C  | -3.768699 | 2.685941  | -2.255930 |
| O  | -2.993508 | 2.348703  | -0.025148 |
| H  | 3.764960  | -0.535913 | 2.928131  |
| H  | 2.428744  | 0.148225  | 3.863789  |
| H  | 2.840981  | -1.595309 | 4.043698  |
| C  | -4.164041 | -3.083117 | 1.072894  |
| H  | -5.537736 | -1.493034 | 0.574717  |
| H  | -2.573318 | -4.454072 | 1.580599  |
| H  | -3.358469 | 3.220948  | -3.123990 |
| H  | -4.181119 | 1.729798  | -2.621632 |
| H  | -4.593263 | 3.256100  | -1.806309 |
| H  | -4.939782 | -3.852556 | 1.096726  |
| C  | 0.386990  | -0.011707 | -2.537932 |
| C  | -0.475464 | -1.070147 | -2.166453 |
| C  | 1.764866  | -0.007493 | -2.162229 |
| H  | -0.037130 | 0.856680  | -3.046462 |
| C  | -1.918279 | -1.075191 | -2.549778 |
| C  | 0.080088  | -2.123710 | -1.377830 |
| C  | 2.301577  | -1.040134 | -1.368219 |
| H  | 2.378750  | 0.859832  | -2.414683 |
| H  | -2.527264 | -1.618716 | -1.810088 |
| H  | -2.292934 | -0.045870 | -2.643529 |
| H  | -2.046217 | -1.579124 | -3.521804 |
| C  | 1.429053  | -2.108675 | -0.979824 |
| H  | -0.580196 | -2.910804 | -1.003065 |

wB97X-D3 SCF (DZ) = -1497.642667  
 G (1 atm) = -1497.181307  
 qh G-E (1 mol/L) = 0.475418  
 qh G-E (24.56 mol/L) = 0.478441  
 Lowest Frequency = -1065.42

HF SCF energy (TZ) = -1488.702380  
 HF SCF energy (QZ) = -1488.791984  
 Correlation energy (DZ) = -5.415147  
 Correlation energy (TZ) = -6.625039  
 DLPNO-CCSD(T1)/CBS = -1496.151005

SMD (MeOH)

HF SCF energy (TZ) = -1488.721048  
 HF SCF energy (QZ) = -1488.810353  
 Correlation energy (DZ) = -5.409308  
 Correlation energy (TZ) = -6.619722  
 DLPNO-CCSD(T1)/CBS = -1496.164272

\*xyz 0 1

|    |           |           |           |
|----|-----------|-----------|-----------|
| Ru | 0.491874  | -0.183049 | -0.410317 |
| C  | 0.298204  | 1.988399  | 0.199053  |
| N  | -1.156300 | -0.165739 | 0.905498  |
| C  | 1.291105  | 2.957730  | -0.012455 |
| C  | -0.339554 | 1.968357  | 1.459051  |
| C  | -2.135673 | -1.201554 | 1.030829  |
| C  | -1.278964 | 0.875926  | 1.657303  |
| C  | 1.630534  | 3.861724  | 0.992483  |
| C  | -0.030009 | 2.886006  | 2.463535  |
| C  | -1.734239 | -2.489065 | 1.392297  |
| C  | -3.477435 | -0.911057 | 0.774631  |
| C  | 0.966669  | 3.830006  | 2.224662  |
| C  | -2.693753 | -3.492963 | 1.503097  |
| C  | -4.427098 | -1.927827 | 0.884918  |
| C  | -4.039221 | -3.217197 | 1.247571  |
| C  | 0.392028  | 0.083102  | -2.568776 |
| C  | -0.502671 | -0.956472 | -2.233197 |
| C  | 1.767203  | 0.047714  | -2.180054 |
| C  | -1.941597 | -0.926060 | -2.659092 |
| C  | 0.016621  | -2.041858 | -1.460515 |
| C  | 2.269177  | -1.020360 | -1.415765 |
| C  | 1.363125  | -2.073968 | -1.058416 |
| C  | 3.695765  | -1.077860 | -0.907464 |
| C  | 4.330293  | 0.293201  | -0.685562 |
| C  | 4.527900  | -1.939135 | -1.866555 |
| H  | 1.791662  | 3.018891  | -0.982562 |
| H  | -2.050132 | 0.917130  | 2.435083  |
| H  | 2.405847  | 4.610798  | 0.815466  |
| H  | -0.540258 | 2.846027  | 3.428795  |
| H  | -0.675316 | -2.673913 | 1.593796  |
| H  | -3.750996 | 0.103946  | 0.474710  |
| H  | 1.231873  | 4.549417  | 3.002506  |
| H  | -2.387581 | -4.500482 | 1.793347  |
| H  | -5.477414 | -1.707529 | 0.682036  |
| H  | -4.785722 | -4.009831 | 1.333574  |
| H  | 0.002034  | 0.970812  | -3.065459 |
| H  | 2.400030  | 0.903974  | -2.410891 |
| H  | -2.590222 | -1.381142 | -1.897877 |
| H  | -2.055959 | -1.499951 | -3.591264 |
| H  | -2.264951 | 0.106127  | -2.838833 |
| H  | -0.662150 | -2.821692 | -1.110936 |
| H  | 1.699037  | -2.859529 | -0.384023 |
| H  | 3.652861  | -1.597311 | 0.063717  |
| H  | 3.707938  | 0.914981  | -0.025402 |
| H  | 4.484812  | 0.832040  | -1.633959 |
| H  | 5.316809  | 0.172158  | -0.214213 |

|   |          |           |           |
|---|----------|-----------|-----------|
| C | 3.727060 | -1.043651 | -0.875904 |
| H | 1.790129 | -2.866249 | -0.281685 |
| C | 4.307255 | 0.340953  | -0.641456 |
| C | 4.573853 | -1.844933 | -1.862915 |
| H | 3.719139 | -1.582369 | 0.090326  |
| H | 5.317489 | 0.253410  | -0.211638 |
| H | 3.683662 | 0.921937  | 0.056666  |
| H | 4.409212 | 0.907397  | -1.583443 |
| H | 5.611478 | -1.927999 | -1.503363 |
| H | 4.178775 | -2.863467 | -2.007235 |
| H | 4.593259 | -1.345754 | -2.847372 |

\*

-----

|   |           |           |           |
|---|-----------|-----------|-----------|
| H | 4.087093  | -2.939326 | -1.996175 |
| H | 4.596222  | -1.463805 | -2.858387 |
| H | 5.548505  | -2.064072 | -1.474920 |
| H | -0.536086 | 1.839654  | -0.768416 |
| O | 1.601332  | -0.105518 | 1.374027  |
| C | 1.844276  | -1.107030 | 2.156136  |
| C | 2.658068  | -0.720591 | 3.377947  |
| O | 1.472618  | -2.273534 | 1.987718  |
| H | 3.554102  | -0.160058 | 3.074716  |
| H | 2.946295  | -1.610587 | 3.950680  |
| H | 2.053841  | -0.056825 | 4.015422  |
| O | -1.482083 | 2.232412  | -1.717619 |
| C | -2.671999 | 2.447606  | -1.275134 |
| C | -3.662677 | 2.941346  | -2.317417 |
| O | -3.049370 | 2.254101  | -0.109075 |
| H | -4.086048 | 2.065109  | -2.834656 |
| H | -4.487007 | 3.485859  | -1.839174 |
| H | -3.169103 | 3.570903  | -3.069401 |

\*

-----

**TS(E-H)1•S**

CPCM (MeOH)

|                      |              |
|----------------------|--------------|
| M06 SCF (DZ) =       | -1383.633117 |
| G (1 atm) =          | -1383.189114 |
| qh-G (1 mol/L) =     | -1383.180652 |
| qh-G (24.56 mol/L) = | -1383.177629 |
| Lowest Frequency =   | -144.5168    |

|                           |              |
|---------------------------|--------------|
| HF SCF energy (TZ) =      | -1375.895629 |
| HF SCF energy (QZ) =      | -1375.978873 |
| Correlation energy (DZ) = | -5.098784    |
| Correlation energy (TZ) = | -6.232027    |
| DLPNO-CCSD(T1)/CBS =      | -1382.898175 |

|                     |              |
|---------------------|--------------|
| PBE0+D3BJ (ATZ) =   | -1383.545672 |
| M06-2X (ATZ) =      | -1384.336327 |
| wB97M-V (ATZ) =     | -1384.403420 |
| B2GP-PLYP (ATZ) =   | -1383.605573 |
| B2K-PLYP (ATZ) =    | -1383.439911 |
| PWPB95 (ATZ) =      | -1383.964145 |
| PWPB95+D3BJ (ATZ) = | -1384.010141 |
| PWPB95+D4 (ATZ) =   | -1384.026794 |

\*xyz 0 1

|    |           |           |           |
|----|-----------|-----------|-----------|
| Ru | 0.149185  | 0.037392  | -0.633247 |
| C  | 1.330225  | 0.781726  | 0.892125  |
| N  | -1.028412 | -0.329101 | 1.130682  |
| C  | 0.818551  | 0.620444  | 2.202234  |
| C  | 2.582033  | 1.394885  | 0.776077  |
| O  | 2.406240  | -1.471367 | -0.824325 |
| O  | 0.222113  | -2.703543 | -0.207711 |
| C  | -2.374663 | -0.778583 | 1.117116  |
| C  | -0.481611 | 0.014697  | 2.257257  |
| C  | 1.523152  | 1.033141  | 3.342823  |
| C  | 3.284530  | 1.816781  | 1.905490  |
| H  | 3.035148  | 1.542210  | -0.210572 |
| C  | 3.358655  | -1.548998 | 0.038228  |
| H  | 1.144705  | -2.389188 | -0.434892 |
| C  | 0.280159  | -3.326060 | 1.055483  |
| C  | -2.741635 | -1.869956 | 0.321547  |
| C  | -3.351666 | -0.095294 | 1.851287  |
| H  | -1.005992 | -0.149461 | 3.210683  |
| C  | 2.763551  | 1.636515  | 3.191692  |
| H  | 1.090477  | 0.879315  | 4.336591  |
| H  | 4.258879  | 2.300215  | 1.783065  |

**TS(E-H)1•S**

CPCM (MeOH)

|                        |              |
|------------------------|--------------|
| wB97X-D3 SCF (DZ) =    | -1384.297459 |
| G (1 atm) =            | -1383.838839 |
| qh G-E (1 mol/L) =     | 0.469618     |
| qh G-E (24.56 mol/L) = | 0.472641     |
| Lowest Frequency =     | -145.27      |

|                           |              |
|---------------------------|--------------|
| HF SCF energy (TZ) =      | -1375.902684 |
| HF SCF energy (QZ) =      | -1375.984734 |
| Correlation energy (DZ) = | -5.094933    |
| Correlation energy (TZ) = | -6.227825    |
| DLPNO-CCSD(T1)/CBS =      | -1382.899271 |

|                     |              |
|---------------------|--------------|
| PBE0+D3BJ (ATZ) =   | -1383.546907 |
| M06-2X (ATZ) =      | -1384.349462 |
| wB97M-V (ATZ) =     | -1384.411347 |
| B2GP-PLYP (ATZ) =   | -1383.619050 |
| B2K-PLYP (ATZ) =    | -1383.442052 |
| PWPB95 (ATZ) =      | -1383.974137 |
| PWPB95+D3BJ (ATZ) = | -1384.019845 |
| PWPB95+D4 (ATZ) =   | -1384.036265 |

SMD (MeOH)

|                           |              |
|---------------------------|--------------|
| HF SCF energy (TZ) =      | -1375.920004 |
| HF SCF energy (QZ) =      | -1376.001758 |
| Correlation energy (DZ) = | -5.090547    |
| Correlation energy (TZ) = | -6.224286    |
| DLPNO-CCSD(T1)/CBS =      | -1382.913161 |

\*xyz 0 1

|    |           |           |           |
|----|-----------|-----------|-----------|
| Ru | 0.121913  | 0.070274  | -0.630637 |
| C  | 1.312556  | 0.796426  | 0.892875  |
| N  | -1.041633 | -0.328824 | 1.117042  |
| C  | 0.830141  | 0.559826  | 2.200566  |
| C  | 2.561065  | 1.424536  | 0.791807  |
| C  | -2.392111 | -0.790498 | 1.100932  |
| C  | -0.484039 | -0.049370 | 2.247985  |
| C  | 1.549245  | 0.909629  | 3.351566  |
| C  | 3.282648  | 1.788291  | 1.930859  |
| C  | -2.733457 | -1.920918 | 0.352171  |
| C  | -3.380047 | -0.078410 | 1.787569  |
| C  | 2.785473  | 1.530829  | 3.213635  |
| C  | -4.058065 | -2.346978 | 0.315447  |
| C  | -4.705752 | -0.510997 | 1.740193  |

|   |           |           |           |
|---|-----------|-----------|-----------|
| C | 4.716577  | -1.108829 | -0.482102 |
| O | 3.255318  | -1.962120 | 1.199770  |
| H | -0.691521 | -3.209419 | 1.567238  |
| H | 0.475297  | -4.412273 | 0.963502  |
| H | 1.078189  | -2.886493 | 1.678160  |
| C | -4.068857 | -2.283863 | 0.287652  |
| H | -1.964383 | -2.381833 | -0.251675 |
| C | -4.678804 | -0.516163 | 1.806955  |
| H | -3.072614 | 0.787357  | 2.434429  |
| H | 3.326804  | 1.971778  | 4.065690  |
| H | 4.631549  | -0.155800 | -1.027773 |
| H | 5.092202  | -1.853950 | -1.203017 |
| H | 5.446170  | -1.010554 | 0.334412  |
| C | -5.042179 | -1.611947 | 1.028225  |
| H | -4.347108 | -3.143330 | -0.327575 |
| H | -5.434974 | 0.028808  | 2.377525  |
| H | -6.084579 | -1.937152 | 0.989799  |
| C | 0.489106  | 1.815688  | -1.773178 |
| C | 1.057807  | 0.742134  | -2.502792 |
| C | -0.874171 | 1.776483  | -1.346945 |
| H | 1.131261  | 2.642845  | -1.459725 |
| C | 0.272489  | -0.397757 | -2.841129 |
| H | 2.126681  | 0.739666  | -2.727818 |
| C | -1.545853 | 2.879328  | -0.565923 |
| C | -1.641526 | 0.626324  | -1.723357 |
| C | 0.913446  | -1.565152 | -3.512794 |
| C | -1.101134 | -0.422981 | -2.493738 |
| C | -0.603749 | 3.718202  | 0.281399  |
| C | -2.322629 | 3.758513  | -1.545234 |
| H | -2.272966 | 2.382482  | 0.106646  |
| H | -2.667398 | 0.540056  | -1.347346 |
| H | 1.875706  | -1.789178 | -3.029194 |
| H | 1.101053  | -1.326895 | -4.572635 |
| H | 0.270881  | -2.455931 | -3.466871 |
| H | -1.698921 | -1.312446 | -2.704844 |
| H | -0.018845 | 3.103873  | 0.984863  |
| H | 0.101581  | 4.291327  | -0.345129 |
| H | -1.181581 | 4.451900  | 0.864697  |
| H | -3.050057 | 3.175649  | -2.132593 |
| H | -1.630272 | 4.247763  | -2.252589 |
| H | -2.870845 | 4.547716  | -1.007228 |

\*

-----

|   |           |           |           |
|---|-----------|-----------|-----------|
| C | -5.048688 | -1.645308 | 1.006266  |
| C | 0.458566  | 1.840880  | -1.785026 |
| C | 1.037491  | 0.764262  | -2.499637 |
| C | -0.905654 | 1.799050  | -1.365636 |
| C | 0.262942  | -0.386826 | -2.820830 |
| C | -1.590441 | 2.934658  | -0.629270 |
| C | -1.664947 | 0.641972  | -1.730281 |
| C | 0.911056  | -1.555633 | -3.503489 |
| C | -1.110977 | -0.421830 | -2.470038 |
| C | -0.697126 | 3.670995  | 0.367086  |
| C | -2.182441 | 3.895525  | -1.669573 |
| H | 2.994600  | 1.631159  | -0.190592 |
| H | -0.999128 | -0.253111 | 3.195635  |
| H | 1.136866  | 0.696374  | 4.341554  |
| H | 4.252252  | 2.281180  | 1.818395  |
| H | -1.942700 | -2.451974 | -0.179928 |
| H | -3.112230 | 0.827231  | 2.336974  |
| H | 3.362442  | 1.816915  | 4.095332  |
| H | -4.319426 | -3.235554 | -0.263415 |
| H | -5.474731 | 0.051448  | 2.274001  |
| H | -6.087660 | -1.979050 | 0.965397  |
| H | 1.091163  | 2.679003  | -1.490302 |
| H | 2.100698  | 0.781176  | -2.738262 |
| H | -2.424167 | 2.479463  | -0.068081 |
| H | -2.690957 | 0.555945  | -1.364689 |
| H | 1.883633  | -1.762041 | -3.039471 |
| H | 1.062960  | -1.314394 | -4.566737 |
| H | 0.281580  | -2.452684 | -3.435950 |
| H | -1.707166 | -1.310080 | -2.680187 |
| H | -0.281501 | 2.984118  | 1.118032  |
| H | 0.142394  | 4.179993  | -0.132954 |
| H | -1.282738 | 4.441632  | 0.890023  |
| H | -2.853275 | 3.369306  | -2.365535 |
| H | -1.380884 | 4.369357  | -2.259758 |
| H | -2.757716 | 4.692110  | -1.174623 |
| O | 2.361649  | -1.568603 | -0.792868 |
| C | 3.390509  | -1.590933 | -0.020641 |
| C | 4.675581  | -1.066337 | -0.648094 |
| O | 3.407549  | -2.021627 | 1.141862  |
| H | 4.486705  | -0.121256 | -1.177086 |
| H | 5.033241  | -1.792427 | -1.395708 |
| H | 5.456841  | -0.923091 | 0.109756  |
| O | 0.237897  | -2.755830 | -0.038861 |
| C | 0.347128  | -3.275837 | 1.271368  |
| H | 1.140920  | -2.405393 | -0.305816 |
| H | -0.607997 | -3.134016 | 1.804081  |
| H | 0.564275  | -4.360373 | 1.256947  |
| H | 1.154453  | -2.773766 | 1.828011  |

\*

-----

### TS(E-H)1•S<sub>2</sub>

CPCM (MeOH)

wB97X-D3 SCF (DZ) = -1500.010742

G (1 atm) = -1499.502379

qh G-E (1 mol/L) = 0.521027

qh G-E (24.56 mol/L) = 0.524050

Lowest Frequency = -133.93

SMD (MeOH)

HF SCF energy (TZ) = -1491.018735

HF SCF energy (QZ) = -1491.108410

Correlation energy (DZ) = -5.471341

Correlation energy (TZ) = -6.695887

DLPNO-CCSD(T1)/CBS = -1498.546863

\*xyz 0 1

|    |           |           |           |
|----|-----------|-----------|-----------|
| Ru | 0.210704  | -0.032766 | -0.529832 |
| C  | 1.509967  | 0.705693  | 0.892091  |
| C  | 2.816008  | 1.185860  | 0.721779  |
| C  | 1.031356  | 0.650380  | 2.221810  |
| C  | 3.595186  | 1.570342  | 1.815999  |
| C  | 1.806689  | 1.021068  | 3.328513  |
| C  | -0.339104 | 0.201280  | 2.344321  |
| C  | 3.100484  | 1.485780  | 3.122171  |
| N  | -0.966949 | -0.091734 | 1.253045  |
| C  | -2.363782 | -0.380806 | 1.324377  |
| C  | -3.208148 | 0.453749  | 2.065565  |
| C  | -2.897305 | -1.463648 | 0.618970  |
| C  | -4.578175 | 0.197846  | 2.107846  |
| C  | -4.266519 | -1.712443 | 0.669425  |
| C  | -5.112106 | -0.884614 | 1.410594  |
| C  | 0.312652  | 1.750729  | -1.654006 |
| C  | 1.205510  | 0.842162  | -2.294022 |
| C  | -1.058923 | 1.412134  | -1.462138 |
| C  | 0.760005  | -0.433367 | -2.680312 |
| C  | -2.058131 | 2.378008  | -0.855485 |
| C  | -1.519763 | 0.143390  | -1.952648 |
| C  | 1.694347  | -1.416623 | -3.319351 |
| C  | -0.626607 | -0.772181 | -2.504249 |
| C  | -1.469690 | 3.305550  | 0.205945  |
| C  | -2.712492 | 3.169710  | -1.995413 |
| H  | 3.252609  | 1.256421  | -0.277825 |
| H  | 4.609284  | 1.942945  | 1.647810  |
| H  | 1.392136  | 0.945258  | 4.337420  |
| H  | -0.840702 | 0.129190  | 3.317678  |
| H  | 3.722501  | 1.785041  | 3.968057  |
| H  | -2.795399 | 1.323663  | 2.581601  |
| H  | -2.221138 | -2.107764 | 0.055475  |
| H  | -5.230142 | 0.858928  | 2.682712  |
| H  | -4.676978 | -2.564742 | 0.123543  |
| H  | -6.186077 | -1.080371 | 1.438361  |
| H  | 0.694701  | 2.701058  | -1.281628 |
| H  | 2.259526  | 1.098743  | -2.405996 |
| H  | -2.838915 | 1.763777  | -0.378205 |
| H  | -2.559256 | -0.144092 | -1.784672 |
| H  | 1.465331  | -2.444781 | -3.014733 |
| H  | 1.577645  | -1.342293 | -4.412547 |
| H  | 2.737821  | -1.197274 | -3.062560 |
| H  | -0.967305 | -1.775335 | -2.766370 |
| H  | -2.276600 | 3.886937  | 0.675880  |
| H  | -0.755888 | 4.024476  | -0.226235 |
| H  | -0.951678 | 2.742063  | 0.996384  |
| H  | -3.180624 | 2.499292  | -2.732150 |
| H  | -1.964766 | 3.785576  | -2.521123 |
| H  | -3.490818 | 3.839411  | -1.600194 |
| O  | 2.199364  | -2.065041 | -0.407104 |
| C  | 3.203996  | -2.044204 | 0.411658  |
| C  | 4.551048  | -1.779570 | -0.241265 |
| O  | 3.126697  | -2.237165 | 1.628743  |
| H  | 4.491999  | -0.883408 | -0.875915 |
| H  | 4.811974  | -2.625257 | -0.896318 |
| H  | 5.337373  | -1.651061 | 0.513313  |
| O  | -0.111965 | -2.748531 | 0.452091  |
| C  | -0.120001 | -3.142167 | 1.809646  |
| H  | 0.837466  | -2.581468 | 0.192166  |
| H  | -1.067126 | -2.824211 | 2.275884  |
| H  | -0.045703 | -4.240917 | 1.908947  |
| H  | 0.723033  | -2.691349 | 2.357828  |
| O  | 1.831998  | -4.383088 | -1.824577 |
| C  | 3.070924  | -4.812036 | -2.345253 |
| H  | 2.001953  | -3.554996 | -1.326817 |

|   |          |           |           |
|---|----------|-----------|-----------|
| H | 3.506473 | -4.081772 | -3.053866 |
| H | 2.908311 | -5.754063 | -2.890434 |
| H | 3.818253 | -5.003904 | -1.552712 |

\*

**TS(E-H)2•S**

CPCM (MeOH)  
M06 SCF (DZ) = -1615.478232  
G (1 atm) = -1615.079353  
qh-G (1 mol/L) = -1615.071525  
qh-G (24.56 mol/L) = -1615.068503  
Lowest Frequency = -127.4500

HF SCF energy (TZ) = -1608.142414  
HF SCF energy (QZ) = -1608.212753  
Correlation energy (DZ) = -4.564008  
Correlation energy (TZ) = -5.596404  
DLPNO-CCSD(T1)/CBS = -1614.433616

PBE0+D3BJ (ATZ) = -1615.316916  
M06-2X (ATZ) = -1616.084390  
wB97M-V (ATZ) = -1616.129743  
B2GP-PLYP (ATZ) = -1615.304934  
B2K-PLYP (ATZ) = -1615.122314  
PWPB95 (ATZ) = -1615.737300  
PWPB95+D3BJ (ATZ) = -1615.780453  
PWPB95+D4 (ATZ) = -1615.793820

\*xyz 0 1

|    |           |           |           |
|----|-----------|-----------|-----------|
| Ru | -0.439749 | -0.478092 | 0.331787  |
| C  | -0.635109 | -0.118422 | 2.409010  |
| C  | -1.653879 | 1.145619  | -0.065174 |
| C  | 0.754050  | -0.114458 | 2.065943  |
| C  | -1.454481 | -1.244170 | 2.119355  |
| N  | 0.762888  | 0.711714  | -0.997973 |
| C  | -1.161780 | 2.046370  | -1.040704 |
| C  | -2.916556 | 1.428561  | 0.468766  |
| C  | 1.666234  | 1.048296  | 2.368394  |
| C  | 1.307019  | -1.310220 | 1.494994  |
| C  | -0.907491 | -2.358803 | 1.443156  |
| C  | 2.151036  | 0.532770  | -1.247812 |
| C  | 0.165416  | 1.751337  | -1.500425 |
| C  | -1.895898 | 3.157258  | -1.483848 |
| C  | -3.642773 | 2.544203  | 0.049356  |
| C  | 0.980127  | 2.404390  | 2.337738  |
| C  | 2.328694  | 0.802335  | 3.723048  |
| C  | 0.501152  | -2.402478 | 1.183390  |
| C  | -1.769933 | -3.499257 | 1.016208  |
| C  | 2.664724  | -0.735665 | -1.534945 |
| C  | 3.020434  | 1.627422  | -1.147688 |
| C  | -3.144027 | 3.407965  | -0.932731 |
| C  | 4.031199  | -0.894404 | -1.743866 |
| C  | 4.386411  | 1.456141  | -1.356153 |
| C  | 4.897140  | 0.195741  | -1.656908 |
| H  | -1.091129 | 0.777664  | 2.838037  |
| H  | -2.529195 | -1.209605 | 2.314065  |
| H  | -3.363288 | 0.764299  | 1.216374  |
| H  | 2.455312  | 1.037363  | 1.591464  |
| H  | 2.361284  | -1.311800 | 1.198729  |
| H  | 0.681135  | 2.396130  | -2.227501 |
| H  | -1.476527 | 3.817023  | -2.250110 |
| H  | -4.622350 | 2.744747  | 0.494117  |
| H  | 0.441647  | 2.575861  | 1.391499  |
| H  | 0.259130  | 2.513572  | 3.166174  |
| H  | 1.727302  | 3.204560  | 2.456822  |

**TS(E-H)2•S**

CPCM (MeOH)  
wB97X-D3 SCF (DZ) = -1616.087577  
G (1 atm) = -1615.676383  
qh G-E (1 mol/L) = 0.421050  
qh G-E (24.56 mol/L) = 0.424073  
Lowest Frequency = -123.98

HF SCF energy (TZ) = -1608.149614  
HF SCF energy (QZ) = -1608.218795  
Correlation energy (DZ) = -4.559583  
Correlation energy (TZ) = -5.592020  
DLPNO-CCSD(T1)/CBS = -1614.434950

PBE0+D3BJ (ATZ) = -1615.317887  
M06-2X (ATZ) = -1616.096228  
wB97M-V (ATZ) = -1616.136113  
B2GP-PLYP (ATZ) = -1615.319380  
B2K-PLYP (ATZ) = -1615.139393  
PWPB95 (ATZ) = -1615.746402  
PWPB95+D3BJ (ATZ) = -1615.789164  
PWPB95+D4 (ATZ) = -1615.802393

SMD (MeOH)

HF SCF energy (TZ) = -1608.158937  
HF SCF energy (QZ) = -1608.228211  
Correlation energy (DZ) = -4.557891  
Correlation energy (TZ) = -5.590725  
DLPNO-CCSD(T1)/CBS = -1614.443331

\*xyz 0 1

|    |           |           |           |
|----|-----------|-----------|-----------|
| Ru | -0.416462 | -0.459291 | 0.356249  |
| C  | -0.592227 | -0.102838 | 2.432951  |
| C  | -1.663262 | 1.130052  | -0.058848 |
| C  | 0.790453  | -0.114751 | 2.081171  |
| C  | -1.431321 | -1.216377 | 2.141921  |
| N  | 0.768272  | 0.724477  | -0.971161 |
| C  | -1.181747 | 2.024644  | -1.042866 |
| C  | -2.931735 | 1.410694  | 0.468387  |
| C  | 1.724209  | 1.037674  | 2.397259  |
| C  | 1.324229  | -1.311657 | 1.492213  |
| C  | -0.909566 | -2.327931 | 1.446646  |
| C  | 2.163709  | 0.549473  | -1.226819 |
| C  | 0.164823  | 1.743054  | -1.494246 |
| C  | -1.918969 | 3.127024  | -1.499430 |
| C  | -3.667600 | 2.515956  | 0.036378  |
| C  | 1.075285  | 2.417121  | 2.295800  |
| C  | 2.331279  | 0.804146  | 3.786792  |
| C  | 0.497415  | -2.383654 | 1.166466  |
| C  | -1.793921 | -3.464220 | 1.020830  |
| C  | 2.665298  | -0.709435 | -1.566722 |
| C  | 3.034672  | 1.634779  | -1.079144 |
| C  | -3.172655 | 3.374178  | -0.953048 |
| C  | 4.032368  | -0.871731 | -1.776734 |
| C  | 4.402334  | 1.461318  | -1.289572 |
| C  | 4.905485  | 0.209121  | -1.638697 |
| H  | -1.029897 | 0.790764  | 2.878631  |
| H  | -2.498829 | -1.168917 | 2.358704  |
| H  | -3.370069 | 0.757381  | 1.227187  |
| H  | 2.539846  | 0.986991  | 1.656678  |



|    |           |           |           |
|----|-----------|-----------|-----------|
| H  | 2.870615  | -0.156691 | 3.745697  |
| H  | 1.569460  | 0.782506  | 4.524372  |
| H  | 3.045360  | 1.605838  | 3.954760  |
| H  | 0.912724  | -3.246911 | 0.626896  |
| H  | -1.449132 | -3.879239 | 0.034202  |
| H  | -1.676196 | -4.320541 | 1.746192  |
| H  | -2.826683 | -3.205141 | 0.958653  |
| H  | 1.970123  | -1.577373 | -1.616798 |
| H  | 2.626647  | 2.610410  | -0.871506 |
| H  | -3.729483 | 4.272062  | -1.255098 |
| H  | 4.424879  | -1.886462 | -1.979971 |
| H  | 5.055719  | 2.315453  | -1.267806 |
| H  | 5.969941  | 0.060731  | -1.814514 |
| O  | -2.734640 | -1.333750 | -1.095614 |
| C  | -3.229386 | -0.602197 | -2.192862 |
| H  | -2.036370 | -1.926823 | -1.461000 |
| H  | -3.869765 | -1.224675 | -2.846263 |
| H  | -2.412106 | -0.181578 | -2.809949 |
| H  | -3.836552 | 0.235671  | -1.815468 |
| Cl | -0.248268 | -2.498410 | -2.208671 |

\*

-----

|    |           |           |           |
|----|-----------|-----------|-----------|
| H  | 2.374697  | -1.331047 | 1.194327  |
| H  | 0.678754  | 2.384554  | -2.221487 |
| H  | -1.503730 | 3.784950  | -2.267719 |
| H  | -4.648910 | 2.711901  | 0.477253  |
| H  | 0.614738  | 2.578646  | 1.309885  |
| H  | 0.299988  | 2.563277  | 3.064559  |
| H  | 1.837804  | 3.195159  | 2.448691  |
| H  | 2.831826  | -0.174225 | 3.847130  |
| H  | 1.549387  | 0.836680  | 4.562960  |
| H  | 3.074114  | 1.582842  | 4.015508  |
| H  | 0.897793  | -3.230520 | 0.609014  |
| H  | -1.481199 | -3.845987 | 0.039689  |
| H  | -1.702517 | -4.279932 | 1.754833  |
| H  | -2.844510 | -3.154697 | 0.965956  |
| H  | 1.968643  | -1.542967 | -1.679483 |
| H  | 2.645071  | 2.606848  | -0.767741 |
| H  | -3.762557 | 4.231035  | -1.284477 |
| H  | 4.418501  | -1.855763 | -2.051496 |
| H  | 5.076970  | 2.311157  | -1.166528 |
| H  | 5.977562  | 0.072580  | -1.795156 |
| O  | -2.784013 | -1.390657 | -1.173788 |
| C  | -3.334560 | -0.647188 | -2.243439 |
| H  | -2.042356 | -1.915168 | -1.550332 |
| H  | -3.917183 | -1.289933 | -2.928276 |
| H  | -2.554631 | -0.127508 | -2.827933 |
| H  | -4.008990 | 0.113726  | -1.824400 |
| Cl | -0.267054 | -2.498964 | -2.306683 |

\*

-----

**TS(E-H)2•S<sub>2</sub>**

CPCM (MeOH)

wB97X-D3 SCF (DZ) = -1731.801080

G (1 atm) = -1731.341828

qh G-E (1 mol/L) = 0.472130

qh G-E (24.56 mol/L) = 0.475153

Lowest Frequency = -116.45

SMD (MeOH)

HF SCF energy (TZ) = -1723.256572

HF SCF energy (QZ) = -1723.334302

Correlation energy (DZ) = -4.938168

Correlation energy (TZ) = -6.062795

DLPNO-CCSD(T1)/CBS = -1730.077678

\*xyz 0 1

|    |           |           |           |
|----|-----------|-----------|-----------|
| Ru | -0.416462 | -0.459291 | 0.356249  |
| C  | -0.592227 | -0.102838 | 2.432951  |
| C  | -1.663262 | 1.130052  | -0.058848 |
| C  | 0.790453  | -0.114751 | 2.081171  |
| C  | -1.431321 | -1.216377 | 2.141921  |
| N  | 0.768272  | 0.724477  | -0.971161 |
| C  | -1.181747 | 2.024644  | -1.042866 |
| C  | -2.931735 | 1.410694  | 0.468387  |
| C  | 1.724209  | 1.037674  | 2.397259  |
| C  | 1.324229  | -1.311657 | 1.492213  |
| C  | -0.909566 | -2.327931 | 1.446646  |
| C  | 2.163709  | 0.549473  | -1.226819 |
| C  | 0.164823  | 1.743054  | -1.494246 |
| C  | -1.918969 | 3.127024  | -1.499430 |
| C  | -3.667600 | 2.515956  | 0.036378  |
| C  | 1.075285  | 2.417121  | 2.295800  |
| C  | 2.331279  | 0.804146  | 3.786792  |
| C  | 0.497415  | -2.383654 | 1.166466  |
| C  | -1.793921 | -3.464220 | 1.020830  |
| C  | 2.665298  | -0.709435 | -1.566722 |

|    |           |           |           |
|----|-----------|-----------|-----------|
| C  | 3.034672  | 1.634779  | -1.079144 |
| C  | -3.172655 | 3.374178  | -0.953048 |
| C  | 4.032368  | -0.871731 | -1.776734 |
| C  | 4.402334  | 1.461318  | -1.289572 |
| C  | 4.905485  | 0.209121  | -1.638697 |
| H  | -1.029897 | 0.790764  | 2.878631  |
| H  | -2.498829 | -1.168917 | 2.358704  |
| H  | -3.370069 | 0.757381  | 1.227187  |
| H  | 2.539846  | 0.986991  | 1.656678  |
| H  | 2.374697  | -1.331047 | 1.194327  |
| H  | 0.678754  | 2.384554  | -2.221487 |
| H  | -1.503730 | 3.784950  | -2.267719 |
| H  | -4.648910 | 2.711901  | 0.477253  |
| H  | 0.614738  | 2.578646  | 1.309885  |
| H  | 0.299988  | 2.563277  | 3.064559  |
| H  | 1.837804  | 3.195159  | 2.448691  |
| H  | 2.831826  | -0.174225 | 3.847130  |
| H  | 1.549387  | 0.836680  | 4.562960  |
| H  | 3.074114  | 1.582842  | 4.015508  |
| H  | 0.897793  | -3.230520 | 0.609014  |
| H  | -1.481199 | -3.845987 | 0.039689  |
| H  | -1.702517 | -4.279932 | 1.754833  |
| H  | -2.844510 | -3.154697 | 0.965956  |
| H  | 1.968643  | -1.542967 | -1.679483 |
| H  | 2.645071  | 2.606848  | -0.767741 |
| H  | -3.762557 | 4.231035  | -1.284477 |
| H  | 4.418501  | -1.855763 | -2.051496 |
| H  | 5.076970  | 2.311157  | -1.166528 |
| H  | 5.977562  | 0.072580  | -1.795156 |
| O  | -2.784013 | -1.390657 | -1.173788 |
| C  | -3.334560 | -0.647188 | -2.243439 |
| H  | -2.042356 | -1.915168 | -1.550332 |
| H  | -3.917183 | -1.289933 | -2.928276 |
| H  | -2.554631 | -0.127508 | -2.827933 |
| H  | -4.008990 | 0.113726  | -1.824400 |
| Cl | -0.267054 | -2.498964 | -2.306683 |

\*

-----

**TS(F-F<sup>A</sup>)**

CPCM (MeOH)  
M06 SCF (DZ) = -1663.658080  
G (1 atm) = -1664.099701  
qh-G (1 mol/L) = -1663.647700  
qh-G (24.56 mol/L) = -1663.644678  
Lowest Frequency = -66.20

HF SCF energy (TZ) = -1655.136388  
HF SCF energy (QZ) = -1655.235195  
Correlation energy (DZ) = -5.812494  
Correlation energy (TZ) = -7.123236  
DLPNO-CCSD(T1)/CBS = -1663.162635

\*xyz 0 1

|    |           |           |           |
|----|-----------|-----------|-----------|
| Ru | -0.381062 | -0.411227 | 0.160683  |
| N  | -1.375709 | 1.382681  | -0.187429 |
| N  | 2.398526  | -1.279680 | 0.823363  |
| C  | -0.690518 | 2.545116  | 0.304196  |
| C  | -2.554401 | 1.613135  | -0.679076 |
| O  | -1.846182 | -0.777082 | 1.684064  |
| O  | 1.028516  | 0.067815  | -1.397450 |
| O  | -0.837027 | -0.902441 | -1.893768 |
| O  | -0.059942 | 0.353416  | 2.132330  |
| C  | 1.206690  | -1.997762 | 1.035881  |
| C  | 3.102478  | -1.496151 | -0.221851 |
| C  | 0.583426  | 2.870034  | -0.165929 |

**TS(F-F<sup>A</sup>)**

CPCM (MeOH)  
WB97X-D3 SCF (DZ) = -1664.870652  
G (1 atm) = -1664.415274  
qh G-E (1 mol/L) = 0.471048  
qh G-E (24.56 mol/L) = 0.474071  
Lowest Frequency = -55.91

HF SCF energy (TZ) = -1655.155464  
HF SCF energy (QZ) = -1655.254021  
Correlation energy (DZ) = -5.807349  
Correlation energy (TZ) = -7.117297  
DLPNO-CCSD(T1)/CBS = -1663.166465

SMD (MeOH)

HF SCF energy (TZ) = -1655.175138  
HF SCF energy (QZ) = -1655.273466  
Correlation energy (DZ) = -5.800659  
Correlation energy (TZ) = -7.112093  
DLPNO-CCSD(T1)/CBS = -1663.181505

\*xyz 0 1

|    |           |          |           |
|----|-----------|----------|-----------|
| Ru | -0.274496 | 0.092507 | 0.540139  |
| N  | -1.893982 | 1.022202 | -0.203679 |
| C  | -2.021511 | 2.405105 | 0.190492  |
| C  | -2.826512 | 0.583597 | -0.981035 |
| C  | -1.137230 | 3.355676 | -0.319461 |

C -1.297708 3.331916 1.285966  
C -3.592039 0.698064 -1.135912  
H -2.837325 2.674202 -0.774322  
C -1.165916 -0.123971 2.533406  
C 0.248810 -0.382367 -2.292937  
C 0.926626 -2.337862 2.396177  
C 0.401528 -2.584328 0.022809  
C 4.282147 -0.692144 -0.544549  
H 2.859943 -2.295630 -0.950799  
C 1.231798 3.994411 0.335725  
H 1.051628 2.233334 -0.919193  
C -0.636420 4.450173 1.788416  
H -2.279898 3.043796 1.673334  
C -3.608875 -0.694617 -0.944254  
C -4.684104 1.301782 -1.786210  
C -1.623910 0.066019 3.936819  
C 0.600731 -0.295259 -3.737071  
C -0.075253 -3.216816 2.716170  
H 1.562584 -1.893387 3.166610  
C -0.626240 -3.500390 0.385890  
H 0.726653 -2.573756 -1.019970  
C 4.630018 0.429614 0.222558  
C 5.067461 -1.032869 -1.652494  
C 0.628572 4.786861 1.312869  
H 2.225385 4.251810 -0.040592  
H -1.113303 5.056037 2.562950  
C -4.682674 -1.446914 -1.401068  
H -2.778619 -1.180687 -0.431150  
C -5.750961 0.543782 -2.251345  
H -4.687290 2.386937 -1.927346  
H -0.998516 -0.551277 4.601264  
H -1.487457 1.114885 4.237405  
H -2.673439 -0.230275 4.054502  
H -0.051508 -0.938011 -4.340648  
H 1.653795 -0.575762 -3.881982  
H 0.488211 0.746550 -4.074427  
C -0.871703 -3.803580 1.701307  
H -0.255828 -3.475135 3.763535  
H -1.210681 -3.970800 -0.410766  
C 5.744015 1.187544 -0.112351  
H 4.004605 0.691247 1.079903  
C 6.185196 -0.272902 -1.986675  
H 4.793104 -1.904603 -2.255453  
H 1.148732 5.662815 1.708000  
C -5.751953 -0.836162 -2.058197  
H -4.687113 -2.528045 -1.241376  
H -6.586175 1.031051 -2.759460  
H -1.667532 -4.502816 1.969045  
C 6.525301 0.837828 -1.217050  
H 6.008875 2.061957 0.487784  
H 6.792866 -0.547105 -2.852587  
H -6.590958 -1.438786 -2.415274  
H 7.400608 1.437653 -1.479307

\*

-----

TS(F-F<sup>A</sup>)  
CPCM (MeOH)  
M06 SCF (DZ) = -1663.658080

C -3.016413 2.769411 1.097122  
C -3.012347 -0.783690 -1.485386  
C -1.259454 4.684285 0.081386  
C -3.126079 4.101170 1.497388  
C -2.635588 -1.934982 -0.779029  
C -3.647037 -0.916174 -2.729509  
C -2.248756 5.060195 0.992187  
C -2.859418 -3.192123 -1.331302  
C -3.852148 -2.175529 -3.286934  
C -3.455056 -3.316141 -2.588242  
H -3.564659 1.318034 -1.330170  
H -0.360038 3.040675 -1.016338  
H -3.690933 2.007450 1.494132  
H -0.571640 5.431740 -0.320079  
H -3.901023 4.386600 2.211930  
H -2.179223 -1.841536 0.205846  
H -3.968114 -0.021353 -3.269238  
H -2.334254 6.101849 1.308847  
H -2.565217 -4.084141 -0.773984  
H -4.330283 -2.266760 -4.264300  
H -3.619521 -4.306061 -3.019836  
N 2.675005 -0.725515 0.942640  
C 1.892673 -1.597972 1.736763  
C 3.341812 -1.222591 -0.028355  
C 1.826308 -1.343687 3.115443  
C 1.171219 -2.676736 1.198167  
C 4.126692 -0.393481 -0.957159  
C 1.095059 -2.184704 3.947130  
C 0.434213 -3.509092 2.040178  
C 4.270767 0.988644 -0.770073  
C 4.715230 -1.003912 -2.071089  
C 0.402792 -3.274479 3.412389  
C 4.986771 1.745196 -1.690348  
C 5.428326 -0.243460 -2.996587  
C 5.562927 1.131394 -2.807520  
H 3.358017 -2.309514 -0.224047  
H 2.369881 -0.486649 3.518477  
H 1.174964 -2.848036 0.119928  
H 1.061876 -1.987648 5.020932  
H -0.126754 -4.342576 1.611793  
H 3.810317 1.457168 0.100638  
H 4.600220 -2.081269 -2.217567  
H -0.178744 -3.927493 4.066561  
H 5.097992 2.821432 -1.541722  
H 5.878805 -0.724384 -3.867317  
H 6.121696 1.730038 -3.530531  
O -1.478759 -0.866584 2.043833  
O -0.518276 1.033928 2.442521  
C -1.242322 0.076087 2.860701  
C -1.814080 0.080482 4.243256  
H -1.078004 0.477444 4.953848  
H -2.693951 0.741796 4.256458  
H -2.122021 -0.930274 4.535327  
O 0.955305 1.093592 -0.894713  
O 0.135794 -0.858452 -1.350563  
C 0.825661 0.141317 -1.725037  
C 1.421071 0.210952 -3.096498  
H 1.693191 -0.793407 -3.443991  
H 2.299191 0.868754 -3.100583  
H 0.665211 0.622532 -3.782803

\*

-----

TS(F-F<sup>A</sup>)  
CPCM (MeOH)  
WB97X-D3 SCF (DZ) = -1664.870652



|   |           |           |           |
|---|-----------|-----------|-----------|
| H | 4.793104  | -1.904603 | -2.255453 |
| H | 1.148732  | 5.662815  | 1.708000  |
| C | -5.751953 | -0.836162 | -2.058197 |
| H | -4.687113 | -2.528045 | -1.241376 |
| H | -6.586175 | 1.031051  | -2.759460 |
| H | -1.667532 | -4.502816 | 1.969045  |
| C | 6.525301  | 0.837828  | -1.217050 |
| H | 6.008875  | 2.061957  | 0.487784  |
| H | 6.792866  | -0.547105 | -2.852587 |
| H | -6.590958 | -1.438786 | -2.415274 |
| H | 7.400608  | 1.437653  | -1.479307 |

\*

-----

|   |           |           |           |
|---|-----------|-----------|-----------|
| H | -0.178744 | -3.927493 | 4.066561  |
| H | 5.097992  | 2.821432  | -1.541722 |
| H | 5.878805  | -0.724384 | -3.867317 |
| H | 6.121696  | 1.730038  | -3.530531 |
| O | -1.478759 | -0.866584 | 2.043833  |
| O | -0.518276 | 1.033928  | 2.442521  |
| C | -1.242322 | 0.076087  | 2.860701  |
| C | -1.814080 | 0.080482  | 4.243256  |
| H | -1.078004 | 0.477444  | 4.953848  |
| H | -2.693951 | 0.741796  | 4.256458  |
| H | -2.122021 | -0.930274 | 4.535327  |
| O | 0.955305  | 1.093592  | -0.894713 |
| O | 0.135794  | -0.858452 | -1.350563 |
| C | 0.825661  | 0.141317  | -1.725037 |
| C | 1.421071  | 0.210952  | -3.096498 |
| H | 1.693191  | -0.793407 | -3.443991 |
| H | 2.299191  | 0.868754  | -3.100583 |
| H | 0.665211  | 0.622532  | -3.782803 |

\*

-----

### cis-TS(F-F<sup>A</sup>)

CPCM (MeOH)

|                      |              |
|----------------------|--------------|
| M06 SCF (DZ) =       | -1664.097149 |
| G (1 atm) =          | -1663.657701 |
| qh-G (1 mol/L) =     | -1663.646296 |
| qh-G (24.56 mol/L) = | -1663.643274 |
| Lowest Frequency =   | -25.8462     |

|                           |              |
|---------------------------|--------------|
| HF SCF energy (TZ) =      | -1655.150292 |
| HF SCF energy (QZ) =      | -1655.250935 |
| Correlation energy (DZ) = | -5.803901    |
| Correlation energy (TZ) = | -7.113431    |
| DLPNO-CCSD(T1)/CBS =      | -1663.159896 |

|                     |              |
|---------------------|--------------|
| PBE0+D3BJ (ATZ) =   | -1663.950620 |
| M06-2X (ATZ) =      | -1664.966681 |
| wB97M-V (ATZ) =     | -1665.067165 |
| B2GP-PLYP (ATZ) =   | -1664.041438 |
| B2K-PLYP (ATZ) =    | -1663.818000 |
| PWPB95 (ATZ) =      | -1664.492143 |
| PWPB95+D3BJ (ATZ) = | -1664.539206 |
| PWPB95+D4 (ATZ) =   | -1664.560889 |

\*xyz 0 1

|    |           |           |           |
|----|-----------|-----------|-----------|
| Ru | -0.526496 | -1.314343 | -0.230268 |
| N  | -1.470259 | -0.096414 | 1.110151  |
| N  | 1.235445  | 1.260731  | -1.360091 |
| C  | -2.852738 | 0.109470  | 0.783052  |
| C  | -1.006028 | 0.685158  | 2.040549  |
| O  | -1.195222 | -0.626816 | -2.110883 |
| O  | 0.256350  | -2.247183 | -2.027378 |
| O  | 0.084427  | -2.563411 | 1.446147  |
| O  | -1.620420 | -3.011769 | 0.190246  |
| C  | 0.302784  | 2.313653  | -1.314885 |
| C  | 2.450463  | 1.519047  | -1.048912 |
| C  | -3.788314 | -0.911464 | 0.956914  |
| C  | -3.247039 | 1.345595  | 0.265682  |
| C  | 0.364445  | 0.866335  | 2.500091  |
| H  | -1.736507 | 1.341869  | 2.539268  |
| C  | -0.399386 | -1.410153 | -2.721855 |
| C  | -0.885576 | -3.331212 | 1.188175  |
| C  | -0.597310 | 2.462580  | -2.378195 |
| C  | 0.216025  | 3.181111  | -0.216036 |
| C  | 3.507233  | 0.511818  | -0.971217 |
| H  | 2.771488  | 2.555999  | -0.817800 |

### cis-TS(F-F<sup>A</sup>)

CPCM (MeOH)

|                        |              |
|------------------------|--------------|
| wB97X-D3 SCF (DZ) =    | -1664.869319 |
| G (1 atm) =            | -1664.415288 |
| qh G-E (1 mol/L) =     | 0.471078     |
| qh G-E (24.56 mol/L) = | 0.474100     |
| Lowest Frequency =     | -38.10       |

|                           |              |
|---------------------------|--------------|
| HF SCF energy (TZ) =      | -1655.152168 |
| HF SCF energy (QZ) =      | -1655.251033 |
| Correlation energy (DZ) = | -5.803910    |
| Correlation energy (TZ) = | -7.114057    |
| DLPNO-CCSD(T1)/CBS =      | -1663.160446 |

|                     |              |
|---------------------|--------------|
| PBE0+D3BJ (ATZ) =   | -1663.949743 |
| M06-2X (ATZ) =      | -1664.987765 |
| wB97M-V (ATZ) =     | -1665.077539 |
| B2GP-PLYP (ATZ) =   | -1664.067735 |
| B2K-PLYP (ATZ) =    | -1663.849073 |
| PWPB95 (ATZ) =      | -1664.506833 |
| PWPB95+D3BJ (ATZ) = | -1664.553560 |
| PWPB95+D4 (ATZ) =   | -1664.575425 |

SMD (MeOH)

|                           |              |
|---------------------------|--------------|
| HF SCF energy (TZ) =      | -1655.169269 |
| HF SCF energy (QZ) =      | -1655.267942 |
| Correlation energy (DZ) = | -5.796564    |
| Correlation energy (TZ) = | -7.108349    |
| DLPNO-CCSD(T1)/CBS =      | -1663.172545 |

\*xyz 0 1

|    |           |           |           |
|----|-----------|-----------|-----------|
| Ru | -0.574274 | -1.283179 | -0.037524 |
| N  | -1.850516 | -0.030626 | 0.965092  |
| N  | 1.759125  | 1.433258  | -0.827602 |
| C  | -3.239113 | -0.131216 | 0.611541  |
| C  | -1.557071 | 0.834694  | 1.875962  |
| O  | -0.485936 | -0.568108 | -2.034479 |
| O  | 0.695122  | -2.303330 | -1.460116 |
| O  | -0.721439 | -2.613073 | 1.650756  |
| O  | -1.967655 | -2.801844 | -0.112523 |
| C  | 0.923188  | 2.536113  | -0.533608 |
| C  | 2.942431  | 1.662410  | -1.246519 |
| C  | -4.185027 | -0.496309 | 1.569626  |
| C  | -3.621881 | 0.105173  | -0.710600 |
| C  | -0.221534 | 1.115793  | 2.407947  |

|   |           |           |           |   |           |           |           |
|---|-----------|-----------|-----------|---|-----------|-----------|-----------|
| C | -5.119875 | -0.683532 | 0.622139  | H | -2.367927 | 1.452824  | 2.282766  |
| H | -3.464089 | -1.875640 | 1.353421  | C | 0.367641  | -1.460152 | -2.351986 |
| C | -4.578940 | 1.558812  | -0.080325 | C | -1.650042 | -3.231612 | 1.049825  |
| H | -2.496880 | 2.129763  | 0.121553  | C | -0.409908 | 2.492678  | -0.960661 |
| C | 1.498348  | 0.215773  | 1.983819  | C | 1.366091  | 3.620168  | 0.235075  |
| C | 0.550290  | 1.828125  | 3.510940  | C | 3.919273  | 0.586156  | -1.497273 |
| C | -0.191958 | -1.291561 | -4.190780 | H | 3.295658  | 2.689583  | -1.449754 |
| C | -1.209226 | -4.528468 | 2.008338  | C | -5.526490 | -0.614570 | 1.202463  |
| C | -1.541538 | 3.482340  | -2.358498 | H | -3.865627 | -0.706054 | 2.593008  |
| H | -0.534012 | 1.765655  | -3.217042 | C | -4.963715 | -0.005364 | -1.064983 |
| C | -0.747393 | 4.188117  | -0.194137 | H | -2.864390 | 0.369320  | -1.450619 |
| H | 0.890138  | 3.038909  | 0.635977  | C | 0.942341  | 0.421525  | 2.045795  |
| C | 4.782008  | 0.916324  | -0.554810 | C | -0.115897 | 2.178472  | 3.319059  |
| C | 3.275544  | -0.838755 | -1.272720 | C | 0.988997  | -1.470969 | -3.712726 |
| C | -5.519787 | 0.547108  | 0.099296  | C | -2.378533 | -4.382317 | 1.663003  |
| H | -5.854491 | -1.479216 | 0.770556  | C | -1.282701 | 3.527149  | -0.635015 |
| H | -4.877510 | 2.526013  | -0.494601 | H | -0.738326 | 1.631818  | -1.545058 |
| C | 2.766053  | 0.519211  | 2.464825  | C | 0.483709  | 4.648459  | 0.565315  |
| H | 1.395190  | -0.537997 | 1.199493  | H | 2.391779  | 3.634133  | 0.611635  |
| C | 1.819233  | 2.134559  | 3.985531  | C | 5.144071  | 0.906361  | -2.095167 |
| H | -0.322254 | 2.347606  | 3.918921  | C | 3.649966  | -0.744620 | -1.147773 |
| H | -1.055930 | -0.817752 | -4.674087 | C | -5.919126 | -0.366743 | -0.111763 |
| H | 0.692057  | -0.652449 | -4.356334 | H | -6.265428 | -0.907564 | 1.951381  |
| H | 0.015635  | -2.272444 | -4.638262 | H | -5.265128 | 0.188523  | -2.096652 |
| H | -0.311011 | -4.905090 | 2.513430  | C | 2.176326  | 0.783453  | 2.572674  |
| H | -1.660490 | -5.312464 | 1.386240  | H | 0.912477  | -0.441861 | 1.366188  |
| H | -1.944438 | -4.242195 | 2.777475  | C | 1.118161  | 2.541239  | 3.849393  |
| C | -1.624663 | 4.347823  | -1.265612 | H | -1.016119 | 2.728684  | 3.603804  |
| H | -2.227828 | 3.598912  | -3.201587 | H | 0.231129  | -1.254883 | -4.476719 |
| H | -0.814108 | 4.850442  | 0.673392  | H | 1.745840  | -0.671856 | -3.748490 |
| C | 5.810020  | -0.012376 | -0.422679 | H | 1.476353  | -2.432573 | -3.910625 |
| H | 4.959124  | 1.971216  | -0.321380 | H | -1.812114 | -4.788280 | 2.508780  |
| C | 4.303903  | -1.762826 | -1.139483 | H | -2.557969 | -5.159391 | 0.908995  |
| H | 2.283752  | -1.156633 | -1.608660 | H | -3.354930 | -4.022123 | 2.021044  |
| H | -6.565741 | 0.714713  | -0.169010 | C | -0.841816 | 4.607925  | 0.132996  |
| C | 2.933823  | 1.480157  | 3.461853  | H | -2.320785 | 3.481917  | -0.973754 |
| H | 3.634119  | 0.000953  | 2.046153  | H | 0.834788  | 5.480984  | 1.179711  |
| H | 1.940713  | 2.888360  | 4.766898  | C | 6.084955  | -0.090286 | -2.351521 |
| H | -2.378900 | 5.138611  | -1.246067 | H | 5.358082  | 1.944747  | -2.363143 |
| C | 5.569779  | -1.354331 | -0.711065 | C | 4.588608  | -1.737979 | -1.404716 |
| H | 6.800251  | 0.310303  | -0.092421 | H | 2.695916  | -0.993585 | -0.681410 |
| H | 4.121269  | -2.814747 | -1.373116 | H | -6.969054 | -0.460543 | -0.397104 |
| H | 3.934436  | 1.718832  | 3.830735  | C | 2.267651  | 1.845357  | 3.474220  |
| H | 6.373396  | -2.087832 | -0.606798 | H | 3.071512  | 0.234953  | 2.273150  |

\*

-----

\*

-----

### TS(F-F<sup>5</sup>)

CPCM (MeOH)

|                      |              |
|----------------------|--------------|
| M06 SCF (DZ) =       | -1223.415304 |
| G (1 atm) =          | -1223.115442 |
| qh-G (1 mol/L) =     | -1223.106496 |
| qh-G (24.56 mol/L) = | -1223.103474 |
| Lowest Frequency =   | -8.73        |

|                           |              |
|---------------------------|--------------|
| HF SCF energy (TZ) =      | -1216.935081 |
| HF SCF energy (QZ) =      | -1217.010753 |
| Correlation energy (DZ) = | -4.157044    |
| Correlation energy (TZ) = | -5.159743    |

### TS(F-F<sup>5</sup>)

CPCM (MeOH)

|                        |              |
|------------------------|--------------|
| wB97X-D3 SCF (DZ) =    | -1223.920773 |
| G (1 atm) =            | -1223.609090 |
| qh G-E (1 mol/L) =     | 0.324063     |
| qh G-E (24.56 mol/L) = | 0.327086     |
| Lowest Frequency =     | -201.15      |

|                           |              |
|---------------------------|--------------|
| HF SCF energy (TZ) =      | -1216.937734 |
| HF SCF energy (QZ) =      | -1217.012360 |
| Correlation energy (DZ) = | -4.156222    |
| Correlation energy (TZ) = | -5.157644    |

DLPNO-CCSD(T1)/CBS = -1222.779210  
 PBE0+D3BJ (ATZ) = -1223.285959  
 M06-2X (ATZ) = -1223.988919  
 WB97M-V (ATZ) = -1224.064012  
 B2GP-PLYP (ATZ) = -1223.370835  
 B2K-PLYP (ATZ) = -1223.212912  
 PWPB95 (ATZ) = -1223.678360  
 PWPB95+D3BJ (ATZ) = -1223.706055  
 PWPB95+D4 (ATZ) = -1223.721115

DLPNO-CCSD(T1)/CBS = -1222.777656  
 PBE0+D3BJ (ATZ) = -1223.284757  
 M06-2X (ATZ) = -1223.995054  
 WB97M-V (ATZ) = -1224.065296  
 B2GP-PLYP (ATZ) = -1223.372310  
 B2K-PLYP (ATZ) = -1223.215691  
 PWPB95 (ATZ) = -1223.678869  
 PWPB95+D3BJ (ATZ) = -1223.708870  
 PWPB95+D4 (ATZ) = -1223.721755

\*xyz 0 1

|    |           |           |           |
|----|-----------|-----------|-----------|
| Ru | -0.252470 | 0.855900  | 0.512370  |
| N  | -0.308791 | -1.035028 | -0.068690 |
| O  | 0.768316  | 3.734761  | 0.075845  |
| C  | -1.642642 | -1.568984 | -0.154770 |
| C  | 0.632018  | -1.840792 | -0.473580 |
| O  | -0.783485 | 0.415434  | 2.539385  |
| O  | 0.243227  | 1.456087  | -1.503935 |
| O  | 1.297517  | 0.441404  | 1.941445  |
| O  | -1.824705 | 1.377215  | -0.855925 |
| C  | -0.147281 | 4.594582  | -0.567771 |
| H  | 0.945926  | 3.005768  | -0.543224 |
| C  | -2.403992 | -1.754323 | 0.999185  |
| C  | -2.168170 | -1.884975 | -1.408684 |
| C  | 2.060266  | -1.625524 | -0.643501 |
| H  | 0.301010  | -2.858445 | -0.730657 |
| C  | 0.438841  | 0.264537  | 2.858508  |
| C  | -0.995073 | 1.610550  | -1.782299 |
| H  | 0.202718  | 4.902211  | -1.570581 |
| H  | -0.254793 | 5.501690  | 0.045063  |
| H  | -1.151983 | 4.141229  | -0.675601 |
| C  | -3.692333 | -2.269300 | 0.890302  |
| H  | -1.976334 | -1.486592 | 1.967347  |
| C  | -3.462281 | -2.390532 | -1.507502 |
| H  | -1.560290 | -1.717399 | -2.303130 |
| C  | 2.723395  | -0.388291 | -0.569366 |
| C  | 2.815744  | -2.775361 | -0.942804 |
| C  | 0.836913  | -0.134919 | 4.235965  |
| C  | -1.435091 | 2.025518  | -3.141161 |
| C  | -4.226315 | -2.585577 | -0.359203 |
| H  | -4.286802 | -2.424800 | 1.794140  |
| H  | -3.874342 | -2.630732 | -2.490745 |
| C  | 4.094497  | -0.316818 | -0.778520 |
| H  | 2.154415  | 0.514819  | -0.347175 |
| C  | 4.187724  | -2.700365 | -1.142922 |
| H  | 2.308614  | -3.742417 | -1.014647 |
| H  | 0.143730  | 0.286644  | 4.975519  |
| H  | 1.866961  | 0.177822  | 4.448287  |
| H  | 0.786077  | -1.232385 | 4.314241  |
| H  | -2.351821 | 2.626908  | -3.079662 |
| H  | -1.663041 | 1.123243  | -3.730926 |
| H  | -0.639428 | 2.581200  | -3.653910 |
| H  | -5.241233 | -2.982882 | -0.437024 |
| C  | 4.832192  | -1.467054 | -1.060920 |
| H  | 4.596338  | 0.652237  | -0.721222 |
| H  | 4.755937  | -3.605828 | -1.367992 |
| H  | 5.911118  | -1.400156 | -1.221824 |

\*

-----

SMD (MeOH)

HF SCF energy (TZ) = -1216.949642  
 HF SCF energy (QZ) = -1217.024069  
 Correlation energy (DZ) = -4.150360  
 Correlation energy (TZ) = -5.152950  
 DLPNO-CCSD(T1)/CBS = -1222.785295

\*xyz 0 1

|    |           |           |           |
|----|-----------|-----------|-----------|
| Ru | -0.143113 | 0.922339  | 0.194050  |
| N  | -0.345197 | -1.028583 | -0.290270 |
| C  | -1.707021 | -1.503334 | -0.357249 |
| C  | 0.560852  | -1.919288 | -0.517941 |
| C  | -2.498775 | -1.507672 | 0.791467  |
| C  | -2.219738 | -1.931500 | -1.581343 |
| C  | 2.009093  | -1.698317 | -0.623502 |
| C  | -3.814423 | -1.957846 | 0.707668  |
| C  | -3.539922 | -2.375526 | -1.655306 |
| C  | 2.561876  | -0.566264 | -1.236670 |
| C  | 2.853489  | -2.702688 | -0.130667 |
| C  | -4.338545 | -2.390127 | -0.512674 |
| C  | 3.944468  | -0.430365 | -1.319275 |
| C  | 4.236098  | -2.551273 | -0.195283 |
| C  | 4.782827  | -1.412962 | -0.788850 |
| H  | 0.222524  | -2.957814 | -0.632163 |
| H  | -2.075343 | -1.156533 | 1.733586  |
| H  | -1.589102 | -1.900003 | -2.472607 |
| H  | -4.436138 | -1.970166 | 1.605458  |
| H  | -3.943512 | -2.708942 | -2.613709 |
| H  | 1.906075  | 0.195631  | -1.659863 |
| H  | 2.420561  | -3.599348 | 0.320262  |
| H  | -5.372917 | -2.735126 | -0.572000 |
| H  | 4.372310  | 0.451255  | -1.801052 |
| H  | 4.888612  | -3.327618 | 0.209288  |
| H  | 5.867201  | -1.296374 | -0.849753 |
| O  | 1.033563  | 3.597391  | -0.002204 |
| C  | -0.214658 | 3.956634  | 0.573788  |
| H  | 0.862395  | 3.188052  | -0.865957 |
| H  | -0.910480 | 4.383320  | -0.166210 |
| H  | -0.027346 | 4.703306  | 1.357466  |
| H  | -0.719185 | 3.097165  | 1.071554  |
| O  | -0.452801 | 0.475040  | 2.283068  |
| O  | 1.556890  | 0.545964  | 1.473191  |
| C  | 0.801710  | 0.371189  | 2.479839  |
| C  | 1.362293  | 0.084406  | 3.836205  |
| H  | 0.583122  | -0.301920 | 4.503159  |
| H  | 1.763177  | 1.019847  | 4.254242  |
| H  | 2.189445  | -0.632301 | 3.753224  |
| O  | 0.148933  | 1.569230  | -1.870920 |
| O  | -1.859557 | 1.418881  | -1.057541 |
| C  | -1.115957 | 1.666453  | -2.051385 |
| C  | -1.669080 | 2.037205  | -3.388876 |
| H  | -2.750340 | 2.203067  | -3.330488 |
| H  | -1.458723 | 1.219148  | -4.093462 |
| H  | -1.162212 | 2.937890  | -3.760391 |

\*

**TS(F<sup>c</sup>-F)**

CPCM (MeOH)

M06 SCF (DZ) = -1496.953559  
G (1 atm) = -1496.504730  
qh-G (1 mol/L) = -1496.493474  
qh-G (24.56 mol/L) = -1496.490451  
Lowest Frequency = -40.95

HF SCF energy (TZ) = -1488.806656  
HF SCF energy (QZ) = -1488.897019  
Correlation energy (DZ) = -5.310318  
Correlation energy (TZ) = -6.515314  
DLPNO-CCSD(T1)/CBS = -1496.143682

PBE0+D3BJ (ATZ) = -1496.836035  
M06-2X (ATZ) = -1497.723123  
wB97M-V (ATZ) = -1497.796822  
B2GP-PLYP (ATZ) = -1496.903168  
B2K-PLYP (ATZ) = -1496.704348  
PWPB95 (ATZ) = -1497.301181  
PWPB95+D3BJ (ATZ) = -1497.344178  
PWPB95+D4 (ATZ) = -1497.364941

**\*xyz 0 1**

|    |           |           |           |
|----|-----------|-----------|-----------|
| Ru | 0.070136  | 0.119289  | 0.117012  |
| C  | 3.110921  | -1.254113 | 0.786954  |
| C  | 2.214053  | -2.271629 | 0.456608  |
| C  | 3.779991  | -0.530107 | -0.206807 |
| H  | 3.282067  | -1.020309 | 1.843691  |
| N  | -1.740620 | 0.912150  | 0.123235  |
| O  | -0.297728 | -0.582033 | -1.881291 |
| O  | 0.713612  | 1.304974  | -1.547230 |
| O  | -0.428188 | -1.094715 | 1.824686  |
| O  | 0.597794  | 0.796316  | 2.081881  |
| C  | 1.965097  | -2.615468 | -0.877020 |
| H  | 1.697430  | -2.814645 | 1.255259  |
| C  | 4.706875  | 0.609712  | 0.150314  |
| C  | 3.532716  | -0.879102 | -1.538274 |
| C  | -1.758667 | 2.345781  | 0.007673  |
| C  | -2.915667 | 0.348178  | 0.138420  |
| C  | 0.287406  | 0.435332  | -2.368572 |
| C  | 0.143085  | -0.271131 | 2.601874  |
| C  | 0.958420  | -3.663685 | -1.235960 |
| C  | 2.648717  | -1.904279 | -1.867474 |
| C  | 3.952891  | 1.726359  | 0.867653  |
| C  | 5.896286  | 0.140283  | 0.982226  |
| H  | 5.097104  | 1.016889  | -0.801448 |
| H  | 4.037867  | -0.324125 | -2.336743 |
| C  | -1.267124 | 3.140187  | 1.043633  |
| C  | -2.274931 | 2.930546  | -1.150062 |
| C  | -3.290522 | -1.057627 | 0.137950  |
| H  | -3.771193 | 1.040289  | 0.164792  |
| C  | 0.461412  | 0.610396  | -3.837746 |
| C  | 0.331333  | -0.572128 | 4.047351  |
| H  | 1.383257  | -4.430938 | -1.903475 |
| H  | 0.565569  | -4.170372 | -0.340520 |
| H  | 0.107589  | -3.204214 | -1.769345 |
| H  | 2.463244  | -2.145016 | -2.920576 |
| H  | 3.096773  | 2.083849  | 0.271795  |
| H  | 3.554529  | 1.375437  | 1.835581  |
| H  | 4.617574  | 2.582389  | 1.070032  |
| H  | 6.585160  | 0.977047  | 1.184653  |
| H  | 5.567229  | -0.257411 | 1.958138  |
| H  | 6.463481  | -0.653532 | 0.469853  |

-----  
**TS(F<sup>c</sup>-F) (Ru-C(*p*-cym) distance constrained at 4.43 Å)**

CPCM (MeOH)

wB97X-D3 SCF (DZ) = -1497.650511  
G (1 atm) = -1497.187056  
qh G-E (1 mol/L) = 0.478519  
qh G-E (24.56 mol/L) = 0.481541  
Lowest Frequency = -33.14

HF SCF energy (TZ) = -1488.816636  
HF SCF energy (QZ) = -1488.905892  
Correlation energy (DZ) = -5.290877  
Correlation energy (TZ) = -6.496312  
DLPNO-CCSD(T1)/CBS = -1496.133477

PBE0+D3BJ (ATZ) = -1496.826507  
M06-2X (ATZ) = -1497.730282  
wB97M-V (ATZ) = -1497.794503  
B2GP-PLYP (ATZ) = -1496.917804  
B2K-PLYP (ATZ) = -1496.722460  
PWPB95 (ATZ) = -1497.307115  
PWPB95+D3BJ (ATZ) = -1497.345903  
PWPB95+D4 (ATZ) = -1497.366946

**SMD (MeOH)**

HF SCF energy (TZ) = -1488.832961  
HF SCF energy (QZ) = -1488.922055  
Correlation energy (DZ) = -5.284457  
Correlation energy (TZ) = -6.491225  
DLPNO-CCSD(T1)/CBS = -1496.145282

**\*xyz 0 1**

|    |           |           |           |
|----|-----------|-----------|-----------|
| Ru | 0.106638  | 0.332639  | 0.838824  |
| N  | -1.724393 | 0.939621  | 0.311588  |
| C  | -1.860716 | 2.377277  | 0.276480  |
| C  | -2.786579 | 0.282311  | -0.018368 |
| C  | -1.969968 | -2.109475 | -0.363770 |
| C  | -1.876869 | 3.102663  | 1.467636  |
| C  | -1.961598 | 3.023304  | -0.955204 |
| C  | -2.987525 | -1.164746 | -0.157707 |
| C  | -2.290825 | -3.454716 | -0.516227 |
| C  | -2.005293 | 4.489283  | 1.418704  |
| C  | -2.083868 | 4.412007  | -0.993575 |
| C  | -4.323994 | -1.597544 | -0.126464 |
| C  | -3.619767 | -3.878439 | -0.454898 |
| C  | -2.106144 | 5.147100  | 0.191367  |
| C  | -4.638734 | -2.946583 | -0.258954 |
| H  | -3.683719 | 0.884335  | -0.213594 |
| H  | -0.931750 | -1.787935 | -0.425428 |
| H  | -1.781125 | 2.575663  | 2.417559  |
| H  | -1.932602 | 2.436741  | -1.876111 |
| H  | -1.494389 | -4.181171 | -0.688813 |
| H  | -2.026087 | 5.059950  | 2.349645  |
| H  | -2.160436 | 4.919673  | -1.957386 |
| H  | -5.122280 | -0.863422 | 0.011083  |
| H  | -3.861124 | -4.937290 | -0.571510 |
| H  | -2.201259 | 6.234489  | 0.159231  |
| H  | -5.680987 | -3.269148 | -0.219780 |
| C  | 3.201282  | -2.836066 | 0.869161  |
| C  | 4.091612  | -1.798385 | 0.607967  |
| C  | 2.544647  | -3.506995 | -0.172509 |
| C  | 4.392195  | -1.411842 | -0.707265 |
| C  | 1.544644  | -4.595655 | 0.123227  |



|   |           |           |           |
|---|-----------|-----------|-----------|
| C | -1.316214 | 4.525836  | 0.922501  |
| H | -0.855130 | 2.658692  | 1.932934  |
| C | -2.309156 | 4.318509  | -1.265960 |
| H | -2.636635 | 2.288648  | -1.959192 |
| C | -2.430611 | -2.138549 | -0.124829 |
| C | -4.648480 | -1.326573 | 0.393410  |
| H | 1.497424  | 0.907819  | -4.056931 |
| H | -0.194493 | 1.422699  | -4.188630 |
| H | 0.210966  | -0.312252 | -4.376244 |
| H | 0.452955  | 0.350834  | 4.628019  |
| H | 1.248622  | -1.173232 | 4.159053  |
| H | -0.507427 | -1.166485 | 4.432104  |
| C | -1.835235 | 5.118883  | -0.229069 |
| H | -0.946750 | 5.150310  | 1.739876  |
| H | -2.711089 | 4.775070  | -2.173952 |
| C | -2.920643 | -3.437868 | -0.120215 |
| H | -1.377449 | -1.949135 | -0.336392 |
| C | -5.130895 | -2.628877 | 0.410658  |
| H | -5.329778 | -0.492395 | 0.587802  |
| H | -1.868264 | 6.207554  | -0.317581 |
| C | -4.265718 | -3.690797 | 0.152361  |
| H | -2.241903 | -4.268083 | -0.333473 |
| H | -6.186340 | -2.816281 | 0.621628  |
| H | -4.639990 | -4.717625 | 0.158194  |

\*

-----

|   |           |           |           |
|---|-----------|-----------|-----------|
| C | 2.851252  | -3.130565 | -1.481783 |
| C | 5.361558  | -0.279721 | -1.000164 |
| C | 3.761989  | -2.103759 | -1.743592 |
| C | 6.806162  | -0.700295 | -0.705122 |
| C | 4.993761  | 1.003930  | -0.247540 |
| H | 2.988688  | -3.112949 | 1.906105  |
| H | 4.569562  | -1.287078 | 1.448330  |
| H | 2.018402  | -5.442292 | 0.644489  |
| H | 1.087343  | -4.978988 | -0.799677 |
| H | 0.739788  | -4.221930 | 0.775323  |
| H | 2.361148  | -3.639894 | -2.316429 |
| H | 5.284952  | -0.070380 | -2.080961 |
| H | 3.977360  | -1.828733 | -2.780488 |
| H | 7.509223  | 0.111254  | -0.950932 |
| H | 6.933720  | -0.944849 | 0.362412  |
| H | 7.089239  | -1.588093 | -1.291655 |
| H | 3.945789  | 1.289243  | -0.428808 |
| H | 5.125411  | 0.883176  | 0.840090  |
| H | 5.637872  | 1.837754  | -0.567237 |
| O | 0.534184  | -0.243760 | -1.180749 |
| O | 1.088715  | 1.724789  | -0.462221 |
| C | 1.083436  | 0.879776  | -1.413121 |
| C | 1.717759  | 1.178309  | -2.733701 |
| H | 2.749904  | 0.795159  | -2.718079 |
| H | 1.747604  | 2.260369  | -2.907850 |
| H | 1.175988  | 0.668550  | -3.539799 |
| O | -0.664798 | -1.112385 | 2.225988  |
| O | -0.121147 | 0.877202  | 2.890270  |
| C | -0.560973 | -0.282606 | 3.181248  |
| C | -0.909819 | -0.654534 | 4.587151  |
| H | -1.557418 | -1.538762 | 4.601048  |
| H | 0.019649  | -0.886065 | 5.128898  |
| H | -1.396492 | 0.190140  | 5.090777  |

\*

-----

### TS(F<sup>c</sup>-F<sup>s</sup>)

CPCM (MeOH)

M06 SCF (DZ) = -1612.622302  
 G (1 atm) = -1612.125063  
 qh-G (1 mol/L) = -1612.113068  
 qh-G (24.56 mol/L) = -1612.110045  
 Lowest Frequency = -10.19

HF SCF energy (TZ) = -1603.896805  
 HF SCF energy (QZ) = -1603.995458  
 Correlation energy (DZ) = -5.690289  
 Correlation energy (TZ) = -6.987678  
 DLPNO-CCSD(T1)/CBS = -1611.770972

\*xyz 0 1

|    |           |           |           |
|----|-----------|-----------|-----------|
| Ru | -0.243436 | -0.124735 | 0.329288  |
| C  | 2.858940  | -1.157531 | 0.990132  |
| C  | 2.292179  | -2.354825 | 0.564552  |
| C  | 3.860016  | -0.514998 | 0.246301  |
| H  | 2.524333  | -0.707245 | 1.933388  |
| N  | -1.398205 | 1.308631  | -0.399588 |
| O  | -0.462117 | -2.854889 | 2.434058  |
| O  | 0.340468  | 1.145507  | 1.985611  |
| O  | -1.368054 | -0.175189 | 2.169625  |
| O  | -0.784472 | -1.495439 | -1.217943 |
| O  | 0.911226  | -0.176770 | -1.473134 |
| C  | 2.692047  | -2.952845 | -0.639174 |
| H  | 1.518669  | -2.826856 | 1.182881  |
| C  | 4.407749  | 0.814941  | 0.716995  |
| C  | 4.272272  | -1.126566 | -0.937196 |

|   |           |           |           |
|---|-----------|-----------|-----------|
| C | -0.667407 | 2.537617  | -0.589931 |
| C | -2.657276 | 1.366732  | -0.721538 |
| C | -1.111364 | -3.722821 | 1.535990  |
| H | -0.930197 | -2.001227 | 2.426399  |
| C | -0.616193 | 0.718299  | 2.692166  |
| C | 0.190710  | -1.108689 | -1.939473 |
| C | 2.046525  | -4.223292 | -1.104215 |
| C | 3.695265  | -2.322214 | -1.373227 |
| H | 5.059243  | -0.668980 | -1.544562 |
| C | 0.099959  | 2.721522  | -1.739686 |
| C | -0.750201 | 3.541396  | 0.374958  |
| C | -3.701557 | 0.358413  | -0.636715 |
| H | -2.994294 | 2.330203  | -1.134273 |
| H | -0.458937 | -4.597043 | 1.374188  |
| H | -2.077018 | -4.095806 | 1.929979  |
| H | -1.293855 | -3.254930 | 0.549203  |
| C | -0.893039 | 1.249913  | 4.054150  |
| C | 0.461185  | -1.707294 | -3.275655 |
| H | 2.423012  | -4.534867 | -2.090588 |
| H | 2.222733  | -5.052047 | -0.397748 |
| H | 0.951930  | -4.101844 | -1.180986 |
| H | 4.038529  | -2.774216 | -2.310859 |
| C | 0.803112  | 3.910528  | -1.910522 |
| H | 0.148308  | 1.923007  | -2.481719 |
| C | -0.038475 | 4.725247  | 0.198017  |
| H | -1.369952 | 3.384758  | 1.261942  |
| C | -3.572595 | -0.903813 | -0.033101 |
| C | -4.939756 | 0.712373  | -1.204326 |
| H | -1.351407 | 0.477170  | 4.684893  |
| H | -1.609755 | 2.082579  | 3.969009  |
| H | 0.024572  | 1.634767  | 4.516392  |
| H | 1.544826  | -1.822619 | -3.421007 |
| H | 0.086381  | -1.028081 | -4.057421 |
| H | -0.045749 | -2.675201 | -3.380418 |
| C | 0.743133  | 4.911149  | -0.941190 |
| H | 1.403332  | 4.055475  | -2.812424 |
| H | -0.099890 | 5.509782  | 0.956418  |
| C | -4.651136 | -1.778700 | -0.010313 |
| H | -2.620332 | -1.184583 | 0.417453  |
| C | -6.013163 | -0.168410 | -1.185238 |
| H | -5.051516 | 1.696145  | -1.670443 |
| H | 1.301164  | 5.840763  | -1.077353 |
| C | -5.870443 | -1.419144 | -0.586556 |
| H | -4.541343 | -2.757187 | 0.464285  |
| H | -6.964693 | 0.122259  | -1.636521 |
| H | -6.712615 | -2.115401 | -0.565823 |
| H | 4.403783  | 0.787139  | 1.824317  |
| C | 5.832280  | 1.091026  | 0.258964  |
| H | 6.215016  | 2.010738  | 0.729775  |
| H | 6.517372  | 0.265964  | 0.513372  |
| H | 5.880917  | 1.246158  | -0.833074 |
| C | 3.480834  | 1.949731  | 0.280238  |
| H | 2.450613  | 1.798190  | 0.643912  |
| H | 3.843648  | 2.921460  | 0.656737  |
| H | 3.443756  | 2.007272  | -0.823030 |

\*

-----

**TS(F<sup>c</sup>-F<sup>s</sup>)1**

CPCM (MeOH)

M06 SCF (DZ) = -1612.620024

G (1 atm) = -1612.118435

qh-G (1 mol/L) = -1612.108549

qh-G (24.56 mol/L) = -1612.105526

Lowest Frequency = -125.60

HF SCF energy (TZ) = -1603.868371  
 HF SCF energy (QZ) = -1603.966590  
 Correlation energy (DZ) = -5.717552  
 Correlation energy (TZ) = -7.016033  
 DLPNO-CCSD(T1)/CBS = -1611.770967

\*xyz 0 1

|    |           |           |           |
|----|-----------|-----------|-----------|
| Ru | 0.155070  | -0.181047 | 0.327231  |
| C  | 2.139627  | -1.218500 | 1.038390  |
| C  | 1.095324  | -2.106389 | 1.350080  |
| C  | 3.039566  | -1.506911 | -0.034194 |
| H  | 2.396053  | -0.405066 | 1.723379  |
| N  | -1.249346 | 1.174812  | -0.363982 |
| O  | 2.122597  | 1.752238  | 1.397148  |
| O  | -1.088846 | -0.429949 | 2.005260  |
| O  | -0.486047 | -1.431031 | -1.198310 |
| O  | 1.109851  | -0.031624 | -1.597723 |
| O  | -0.177711 | 1.463990  | 2.735243  |
| C  | 0.916854  | -3.308657 | 0.603708  |
| H  | 0.544231  | -1.997217 | 2.288069  |
| C  | 4.121925  | -0.502525 | -0.346412 |
| C  | 2.856469  | -2.681112 | -0.730975 |
| C  | -0.736751 | 2.501130  | -0.599731 |
| C  | -2.505451 | 1.051921  | -0.663032 |
| C  | 2.597313  | 2.879988  | 0.707180  |
| H  | 1.281368  | 1.939513  | 1.860546  |
| C  | -1.007355 | 0.539646  | 2.837582  |
| C  | 0.355723  | -0.949163 | -2.030739 |
| C  | -0.238606 | -4.199406 | 0.922317  |
| C  | 1.803837  | -3.574494 | -0.413146 |
| C  | 4.821598  | -0.743791 | -1.672961 |
| C  | 5.143529  | -0.421970 | 0.786405  |
| H  | 3.606348  | 0.475799  | -0.400320 |
| H  | 3.526544  | -2.941752 | -1.555240 |
| C  | -0.227659 | 2.832223  | -1.855971 |
| C  | -0.815133 | 3.461581  | 0.408832  |
| C  | -3.417215 | -0.085982 | -0.601795 |
| H  | -2.989290 | 1.962084  | -1.055309 |
| H  | 2.575064  | 3.796057  | 1.325874  |
| H  | 2.029008  | 3.077866  | -0.222068 |
| H  | 3.647833  | 2.692545  | 0.428019  |
| C  | -2.010633 | 0.530350  | 3.957118  |
| C  | 0.450350  | -1.466108 | -3.420732 |
| H  | -1.184268 | -3.719266 | 0.609203  |
| H  | -0.322360 | -4.388574 | 2.005351  |
| H  | -0.168227 | -5.167570 | 0.404512  |
| H  | 1.693381  | -4.495699 | -0.995902 |
| H  | 5.531079  | 0.071955  | -1.885019 |
| H  | 5.402089  | -1.683351 | -1.659049 |
| H  | 4.107145  | -0.798895 | -2.510705 |
| H  | 5.895589  | 0.357530  | 0.578269  |
| H  | 5.675584  | -1.383572 | 0.897684  |
| H  | 4.672259  | -0.181680 | 1.752855  |
| C  | 0.196953  | 4.135801  | -2.102268 |
| H  | -0.175969 | 2.064396  | -2.631733 |
| C  | -0.387696 | 4.762110  | 0.151399  |
| H  | -1.200204 | 3.172193  | 1.389263  |
| C  | -3.166024 | -1.331839 | -0.001329 |
| C  | -4.667424 | 0.126786  | -1.211948 |
| H  | -2.174714 | -0.490426 | 4.329003  |
| H  | -2.974748 | 0.896812  | 3.568338  |
| H  | -1.690722 | 1.189581  | 4.774042  |
| H  | -0.437431 | -2.052520 | -3.687884 |
| H  | 1.340756  | -2.111720 | -3.493296 |
| H  | 0.585533  | -0.632517 | -4.124210 |
| C  | 0.115936  | 5.103993  | -1.102290 |

|   |           |           |           |
|---|-----------|-----------|-----------|
| H | 0.586748  | 4.397359  | -3.089255 |
| H | -0.456001 | 5.516456  | 0.939486  |
| C | -4.136288 | -2.324865 | -0.029018 |
| H | -2.218562 | -1.506119 | 0.504561  |
| C | -5.630789 | -0.873406 | -1.246490 |
| H | -4.877822 | 1.096808  | -1.672728 |
| H | 0.444817  | 6.126813  | -1.301539 |
| C | -5.365168 | -2.105608 | -0.653614 |
| H | -3.933679 | -3.287475 | 0.447969  |
| H | -6.591507 | -0.689205 | -1.732617 |
| H | -6.119205 | -2.896560 | -0.670982 |

\*

-----

**TS(F<sup>c</sup>-F<sup>s</sup>)2**

CPCM (MeOH)

|                      |              |
|----------------------|--------------|
| M06 SCF (DZ) =       | -1612.619686 |
| G (1 atm) =          | -1612.121567 |
| qh-G (1 mol/L) =     | -1612.110050 |
| qh-G (24.56 mol/L) = | -1612.107027 |
| Lowest Frequency =   | -32.05       |

|                           |              |
|---------------------------|--------------|
| HF SCF energy (TZ) =      | -1603.900002 |
| HF SCF energy (QZ) =      | -1603.998607 |
| Correlation energy (DZ) = | -5.685052    |
| Correlation energy (TZ) = | -6.982518    |
| DLPNO-CCSD(T1)/CBS =      | -1611.768990 |

\*xyz 0 1

|    |           |           |           |
|----|-----------|-----------|-----------|
| Ru | 0.528820  | -0.259699 | 0.697396  |
| C  | -3.114084 | -0.580930 | 1.091218  |
| C  | -2.738079 | 0.685331  | 1.534259  |
| C  | -3.959261 | -0.743158 | -0.009388 |
| H  | -2.715564 | -1.465448 | 1.600624  |
| N  | 1.337319  | 0.832635  | -0.809509 |
| O  | -0.276615 | -1.268314 | 2.475022  |
| O  | 1.015016  | 1.442915  | 1.989849  |
| O  | -1.165157 | -1.329558 | -1.559887 |
| O  | 0.412052  | -2.129202 | -0.200482 |
| O  | 2.337183  | -0.245579 | 1.684524  |
| C  | -3.191886 | 1.842066  | 0.892759  |
| H  | -2.070692 | 0.786951  | 2.397102  |
| C  | -4.368044 | -2.128925 | -0.455497 |
| C  | -4.429111 | 0.413051  | -0.640222 |
| C  | 0.520295  | 1.973203  | -1.130286 |
| C  | 2.526446  | 0.856944  | -1.335626 |
| C  | 0.414330  | -2.437747 | 2.926883  |
| H  | -0.323768 | -0.634268 | 3.206694  |
| C  | 2.134920  | 0.900382  | 2.216325  |
| C  | -0.464630 | -2.258913 | -1.140181 |
| C  | -2.775409 | 3.201475  | 1.366835  |
| C  | -4.049760 | 1.679796  | -0.198971 |
| C  | -4.334714 | -2.310616 | -1.967185 |
| C  | -5.743553 | -2.480969 | 0.105986  |
| H  | -3.630770 | -2.828484 | -0.015772 |
| H  | -5.098966 | 0.329695  | -1.502775 |
| C  | -0.677182 | 1.789740  | -1.823765 |
| C  | 0.933935  | 3.256815  | -0.761787 |
| C  | 3.597408  | -0.123738 | -1.225807 |
| H  | 2.770982  | 1.733595  | -1.956649 |
| H  | -0.130618 | -2.895276 | 3.765875  |
| H  | 1.445087  | -2.195868 | 3.228530  |
| H  | 0.438688  | -3.128909 | 2.075906  |
| C  | 3.204905  | 1.554193  | 3.016668  |
| C  | -0.609890 | -3.657207 | -1.686383 |
| H  | -2.751738 | 3.925716  | 0.537036  |

|   |           |           |           |
|---|-----------|-----------|-----------|
| H | -3.469544 | 3.597905  | 2.128579  |
| H | -1.773352 | 3.175389  | 1.826077  |
| H | -4.420458 | 2.568019  | -0.722918 |
| H | -4.550222 | -3.359391 | -2.232849 |
| H | -5.098541 | -1.689506 | -2.467264 |
| H | -3.343235 | -2.041387 | -2.364337 |
| H | -6.035482 | -3.508531 | -0.169163 |
| H | -6.510485 | -1.794408 | -0.295568 |
| H | -5.765212 | -2.400360 | 1.205407  |
| C | -1.442300 | 2.900466  | -2.171149 |
| H | -0.988168 | 0.771075  | -2.071284 |
| C | 0.155590  | 4.358552  | -1.106610 |
| H | 1.861593  | 3.378760  | -0.195215 |
| C | 3.402619  | -1.473163 | -0.890210 |
| C | 4.895229  | 0.323105  | -1.526674 |
| H | 2.774423  | 2.238969  | 3.758430  |
| H | 3.842194  | 2.140706  | 2.334605  |
| H | 3.837578  | 0.801553  | 3.505155  |
| H | -1.398352 | -4.181049 | -1.121302 |
| H | -0.917965 | -3.629408 | -2.740710 |
| H | 0.318437  | -4.234105 | -1.574716 |
| C | -1.030223 | 4.185066  | -1.819726 |
| H | -2.372558 | 2.756506  | -2.727551 |
| H | 0.480863  | 5.361188  | -0.816992 |
| C | 4.488984  | -2.337564 | -0.838170 |
| H | 2.394270  | -1.840815 | -0.686403 |
| C | 5.980688  | -0.542204 | -1.452587 |
| H | 5.048770  | 1.369102  | -1.810265 |
| H | -1.635583 | 5.051979  | -2.097435 |
| C | 5.779148  | -1.877421 | -1.106843 |
| H | 4.327296  | -3.389008 | -0.586076 |
| H | 6.986190  | -0.175744 | -1.672890 |
| H | 6.627537  | -2.564726 | -1.056162 |

\*

-----

**TS(F<sup>S</sup>-F<sup>A</sup>)**

CPCM (MeOH)

M06 SCF (DZ) = -1779.770970

G (1 atm) = -1779.281047

qh-G (1 mol/L) = -1779.269863

qh-G (24.56 mol/L) = -1779.266841

Lowest Frequency = -40.7338

HF SCF energy (TZ) = -1770.240924

HF SCF energy (QZ) = -1770.349197

Correlation energy (DZ) = -6.190395

Correlation energy (TZ) = -7.592049

DLPNO-CCSD(T1)/CBS = -1778.792907

\*xyz 0 1

|    |           |           |           |
|----|-----------|-----------|-----------|
| Ru | 0.380597  | -0.109723 | 0.241820  |
| N  | 1.939529  | 0.581077  | -0.757390 |
| O  | -0.613677 | -1.612815 | 2.665818  |
| C  | 1.666350  | 1.832395  | -1.418321 |
| C  | 3.171051  | 0.168872  | -0.848235 |
| N  | -2.818350 | 0.201505  | 0.621469  |
| O  | -0.748450 | -0.412741 | -1.563661 |
| O  | 1.435829  | 0.140143  | 2.113690  |
| O  | 0.449996  | -2.011125 | -0.731270 |
| O  | 0.251139  | 1.761097  | 1.299971  |
| C  | -1.449419 | -0.868132 | 3.522314  |
| H  | 0.277354  | -1.226881 | 2.719073  |
| C  | 0.961535  | 1.855147  | -2.621609 |
| C  | 2.120361  | 3.018903  | -0.841273 |
| C  | 3.827361  | -0.993795 | -0.269559 |

|   |           |           |           |
|---|-----------|-----------|-----------|
| H | 3.833905  | 0.796324  | -1.463842 |
| C | -2.807914 | 1.607295  | 0.598476  |
| C | -3.443113 | -0.407773 | -0.313595 |
| C | -0.349278 | -1.615000 | -1.638285 |
| C | 0.994546  | 1.337029  | 2.226379  |
| H | -1.358976 | -1.191617 | 4.576153  |
| H | -2.491022 | -1.014191 | 3.195341  |
| H | -1.241006 | 0.217974  | 3.472331  |
| C | 0.706879  | 3.075434  | -3.241724 |
| H | 0.611333  | 0.916065  | -3.052637 |
| C | 1.856158  | 4.234914  | -1.465898 |
| H | 2.670698  | 2.978276  | 0.103012  |
| C | 3.237399  | -1.930619 | 0.597038  |
| C | 5.181418  | -1.160572 | -0.617365 |
| C | -2.496875 | 2.326422  | -0.564188 |
| C | -3.058851 | 2.303380  | 1.787307  |
| C | -3.468357 | -1.863755 | -0.458814 |
| H | -4.024605 | 0.151938  | -1.075527 |
| C | -0.776716 | -2.523635 | -2.737513 |
| C | 1.364121  | 2.186121  | 3.391542  |
| C | 1.147059  | 4.266925  | -2.665403 |
| H | 0.161003  | 3.093619  | -4.188525 |
| H | 2.209432  | 5.163526  | -1.010652 |
| C | 3.984452  | -2.992893 | 1.089658  |
| H | 2.190120  | -1.817012 | 0.878309  |
| C | 5.923740  | -2.225027 | -0.123240 |
| H | 5.652201  | -0.435577 | -1.288437 |
| C | -2.442951 | 3.717691  | -0.532485 |
| H | -2.246936 | 1.775689  | -1.475939 |
| C | -3.024251 | 3.693591  | 1.807101  |
| H | -3.290068 | 1.731738  | 2.690887  |
| C | -4.299049 | -2.426848 | -1.436389 |
| C | -2.680311 | -2.702769 | 0.343696  |
| H | -1.529861 | -2.042604 | -3.373946 |
| H | -1.184674 | -3.452240 | -2.309044 |
| H | 0.098269  | -2.797800 | -3.346428 |
| H | 2.348752  | 2.643472  | 3.204187  |
| H | 1.447130  | 1.574287  | 4.300065  |
| H | 0.629510  | 2.989659  | 3.531798  |
| H | 0.941731  | 5.221788  | -3.155600 |
| C | 5.325021  | -3.146431 | 0.734305  |
| H | 3.513439  | -3.713220 | 1.763142  |
| H | 6.973038  | -2.335712 | -0.406401 |
| C | -2.710671 | 4.407710  | 0.649228  |
| H | -2.181191 | 4.267876  | -1.441184 |
| H | -3.236270 | 4.226766  | 2.738024  |
| C | -4.351266 | -3.806376 | -1.611935 |
| H | -4.909256 | -1.768753 | -2.063467 |
| C | -2.733828 | -4.079981 | 0.163058  |
| H | -2.014563 | -2.263017 | 1.093507  |
| H | 5.903741  | -3.985735 | 1.128227  |
| H | -2.668016 | 5.499703  | 0.671129  |
| C | -3.567097 | -4.635266 | -0.811342 |
| H | -5.003723 | -4.236733 | -2.375640 |
| H | -2.116422 | -4.732636 | 0.786157  |
| H | -3.603326 | -5.719436 | -0.946688 |

\*

-----

**cis-TS(F<sup>A</sup>-G<sup>A</sup>)1**

CPCM (MeOH)

|                      |              |
|----------------------|--------------|
| M06 SCF (DZ) =       | -1664.113119 |
| G (1 atm) =          | -1663.671374 |
| qh-G (1 mol/L) =     | -1663.660703 |
| qh-G (24.56 mol/L) = | -1663.657681 |
| Lowest Frequency =   | -85.62       |

**cis-TS(F<sup>A</sup>-G<sup>A</sup>)1**

CPCM (MeOH)

|                        |              |
|------------------------|--------------|
| wB97X-D3 SCF (DZ) =    | -1664.887603 |
| G (1 atm) =            | -1664.428557 |
| qh G-E (1 mol/L) =     | 0.473392     |
| qh G-E (24.56 mol/L) = | 0.476415     |
| Lowest Frequency =     | -71.97       |

HF SCF energy (TZ) = -1655.145302  
 HF SCF energy (QZ) = -1655.245906  
 Correlation energy (DZ) = -5.830395  
 Correlation energy (TZ) = -7.143540  
 DLPNO-CCSD(T1)/CBS = -1663.187076

PBE0+D3BJ (ATZ) = -1663.975662  
 M06-2X (ATZ) = -1664.979338  
 wB97M-V (ATZ) = -1665.088631  
 B2GP-PLYP (ATZ) = -1664.059615  
 B2K-PLYP (ATZ) = -1663.834922  
 PWPB95 (ATZ) = -1664.508762  
 PWPB95+D3BJ (ATZ) = -1664.559079  
 PWPB95+D4 (ATZ) = -1664.580802

\*xyz 0 1

|    |           |           |           |
|----|-----------|-----------|-----------|
| Ru | 0.094399  | -0.954469 | 0.115993  |
| C  | 2.583424  | -1.641244 | -1.038223 |
| N  | -1.099537 | 0.342441  | 1.075850  |
| C  | 3.642068  | -2.401656 | -0.551462 |
| C  | 2.814930  | -0.343007 | -1.521906 |
| H  | 1.595867  | -2.122108 | -1.158800 |
| O  | -0.060135 | -3.335983 | -1.451828 |
| N  | 0.527248  | 0.409558  | -1.393676 |
| O  | 0.048489  | -2.376705 | 1.728710  |
| O  | -1.479596 | -1.670188 | -1.041051 |
| O  | 1.564160  | -0.816152 | 1.754913  |
| C  | -2.475138 | -0.078389 | 1.156801  |
| C  | -0.881657 | 1.526269  | 1.576040  |
| C  | 4.934893  | -1.878773 | -0.549559 |
| H  | 3.456800  | -3.413625 | -0.181558 |
| C  | 4.123793  | 0.157926  | -1.557898 |
| C  | 1.713164  | 0.517217  | -1.913364 |
| C  | -1.176320 | -2.805301 | -1.566728 |
| C  | -0.435668 | 1.378204  | -1.841818 |
| C  | 1.069132  | -1.856888 | 2.281785  |
| C  | -2.823800 | -1.223229 | 1.872361  |
| C  | -3.452126 | 0.668598  | 0.497232  |
| C  | 0.289652  | 2.393674  | 1.573975  |
| H  | -1.756900 | 1.995902  | 2.049807  |
| C  | 5.176942  | -0.603567 | -1.063405 |
| H  | 5.763988  | -2.475233 | -0.160638 |
| H  | 4.302909  | 1.163590  | -1.950606 |
| H  | 1.909560  | 1.317978  | -2.642290 |
| C  | -2.283820 | -3.450850 | -2.356729 |
| C  | -1.614597 | 0.956436  | -2.460150 |
| C  | -0.190217 | 2.742603  | -1.662967 |
| C  | 1.693519  | -2.481431 | 3.482569  |
| C  | -4.157838 | -1.614628 | 1.925839  |
| H  | -2.041015 | -1.798299 | 2.370330  |
| C  | -4.783556 | 0.262293  | 0.547590  |
| H  | -3.155046 | 1.553343  | -0.074643 |
| C  | 1.587811  | 2.063372  | 1.149149  |
| C  | 0.042722  | 3.715070  | 1.993696  |
| H  | 6.192773  | -0.201817 | -1.076016 |
| H  | -2.505141 | -2.838752 | -3.245815 |
| H  | -3.204989 | -3.490523 | -1.756312 |
| H  | -2.000606 | -4.461348 | -2.677339 |
| C  | -2.536944 | 1.901147  | -2.900661 |
| H  | -1.797801 | 0.112714  | -2.572798 |
| C  | -1.131019 | 3.679165  | -2.085092 |
| H  | 0.729997  | 3.067713  | -1.168803 |
| H  | 0.950217  | -3.042993 | 4.062776  |
| H  | 2.469536  | -3.187536 | 3.145742  |
| H  | 2.178375  | -1.720692 | 4.107854  |

HF SCF energy (TZ) = -1655.156379  
 HF SCF energy (QZ) = -1655.255441  
 Correlation energy (DZ) = -5.820983  
 Correlation energy (TZ) = -7.133279  
 DLPNO-CCSD(T1)/CBS = -1663.185391

PBE0+D3BJ (ATZ) = -1663.976330  
 M06-2X (ATZ) = -1665.008504  
 wB97M-V (ATZ) = -1665.099868  
 B2GP-PLYP (ATZ) = -1664.090789  
 B2K-PLYP (ATZ) = -1663.873080  
 PWPB95 (ATZ) = -1664.526026  
 PWPB95+D3BJ (ATZ) = -1664.578527  
 PWPB95+D4 (ATZ) = -1664.597565

SMD (MeOH)

HF SCF energy (TZ) = -1655.173397  
 HF SCF energy (QZ) = -1655.272205  
 Correlation energy (DZ) = -5.814879  
 Correlation energy (TZ) = -7.128243  
 DLPNO-CCSD(T1)/CBS = -1663.197666

\*xyz 0 1

|    |           |           |           |
|----|-----------|-----------|-----------|
| Ru | -0.368408 | -0.523833 | -0.367189 |
| C  | -2.801546 | -1.822687 | 0.501005  |
| N  | -0.810885 | 0.082385  | 1.611348  |
| C  | -3.836468 | -2.393806 | -0.235315 |
| C  | -3.067088 | -0.766973 | 1.383617  |
| N  | 0.802624  | 1.110858  | -0.721650 |
| C  | 0.116729  | 0.803158  | 2.447601  |
| C  | -1.986395 | -0.095779 | 2.112721  |
| C  | -5.139534 | -1.914484 | -0.095073 |
| C  | -4.381889 | -0.313406 | 1.548744  |
| C  | 2.148910  | 0.798948  | -1.153564 |
| C  | 0.604954  | 2.377086  | -0.542739 |
| C  | 1.403976  | 0.299476  | 2.645723  |
| C  | -0.266054 | 2.002812  | 3.055474  |
| C  | -5.411998 | -0.878149 | 0.800390  |
| C  | 2.368447  | 0.177081  | -2.382483 |
| C  | 3.223592  | 1.131541  | -0.327406 |
| C  | -0.550198 | 3.106871  | 0.000947  |
| C  | 2.295157  | 0.988463  | 3.465955  |
| C  | 0.635772  | 2.690503  | 3.865594  |
| C  | 3.672496  | -0.109124 | -2.781019 |
| C  | 4.524731  | 0.836466  | -0.732285 |
| C  | -1.876060 | 2.653003  | 0.040290  |
| C  | -0.247590 | 4.369853  | 0.538495  |
| C  | 1.918379  | 2.185766  | 4.075981  |
| C  | 4.753451  | 0.215256  | -1.959132 |
| C  | -2.863046 | 3.432905  | 0.636522  |
| C  | -1.233003 | 5.138859  | 1.149556  |
| C  | -2.545234 | 4.668001  | 1.204291  |
| H  | -1.795170 | -2.268132 | 0.439847  |
| H  | -3.622422 | -3.217955 | -0.918906 |
| H  | -2.212036 | 0.292392  | 3.114282  |
| H  | -5.950285 | -2.358646 | -0.676650 |
| H  | -4.590026 | 0.499968  | 2.248348  |
| H  | 1.455106  | 3.031070  | -0.776093 |
| H  | 1.694393  | -0.619749 | 2.137563  |
| H  | -1.259608 | 2.416884  | 2.871320  |
| H  | -6.432915 | -0.508876 | 0.916621  |
| H  | 1.517343  | -0.086953 | -3.009665 |
| H  | 3.035680  | 1.602753  | 0.639499  |
| H  | 3.298343  | 0.585205  | 3.621698  |
| H  | 0.330775  | 3.633635  | 4.324143  |

```

C -5.140209 -0.879451 1.261278
H -4.433443 -2.506917 2.493868
H -5.545022 0.843598 0.021347
C 2.587871 3.027027 1.128695
H 1.811332 1.046124 0.839355
C 1.041738 4.679625 1.961050
H -0.960811 3.988078 2.334002
C -2.305844 3.262772 -2.707354
H -3.452642 1.565941 -3.394849
H -0.937902 4.743264 -1.926145
H -6.184758 -1.198221 1.300673
C 2.320521 4.338466 1.524012
H 3.591022 2.748781 0.794280
H 0.821979 5.701253 2.279423
H -3.040593 3.998701 -3.043071
H 3.110881 5.092674 1.496835

```

\*

-----

```

H 3.843368 -0.590429 -3.746466
H 5.362191 1.093642 -0.080174
H -2.138114 1.702009 -0.415645
H 0.780533 4.738406 0.498210
H 2.624334 2.727472 4.709139
H 5.772869 -0.016734 -2.274725
H -3.892504 3.068853 0.658009
H -0.976370 6.108584 1.580565
H -3.323773 5.268369 1.680119
O -0.073622 -3.364493 0.095672
O 1.273264 -1.608757 0.329175
C 1.032225 -2.871043 0.380936
C 2.181426 -3.735223 0.848188
H 3.128814 -3.386631 0.416103
H 2.262224 -3.648531 1.943051
H 2.005650 -4.786372 0.589992
O -0.410875 -1.138058 -2.453414
O -1.974295 0.195106 -1.734031
C -1.483178 -0.492370 -2.679687
C -2.166013 -0.579336 -4.010330
H -2.762917 0.321402 -4.196203
H -2.840867 -1.448980 -3.994814
H -1.429587 -0.728634 -4.809337

```

\*

-----

#### TS(F<sup>A</sup>-G<sup>A</sup>)1

CPCM (MeOH)

```

wB97X-D3 SCF (DZ) = -1664.889819
G (1 atm) = -1664.428557
qh G-E (1 mol/L) = 0.471897
qh G-E (24.56 mol/L) = 0.474920
Lowest Frequency = -75.41

```

```

HF SCF energy (TZ) = -1655.165780
HF SCF energy (QZ) = -1655.264686
Correlation energy (DZ) = -5.813660
Correlation energy (TZ) = -7.123642
DLPNO-CCSD(T1)/CBS = -1663.183599

```

SMD (MeOH)

```

HF SCF energy (TZ) = -1655.165781
HF SCF energy (QZ) = -1655.281997
Correlation energy (DZ) = -5.807311
Correlation energy (TZ) = -7.118543
DLPNO-CCSD(T1)/CBS = -1663.201757

```

\*xyz 0 1

```

Ru -0.040317 0.079470 0.203910
C -2.855830 0.456917 0.909533
N 0.204770 -1.948799 -0.283158
C -3.998516 -0.318166 0.731731
C -2.839148 1.791565 0.477180
H -2.016562 0.033142 1.482278
N -0.440702 2.113703 0.538914
O -0.785009 -0.878849 2.879139
O 1.330876 0.621002 -1.258864
O 1.081472 -0.103825 1.958616
O -0.748732 0.393606 -1.826688
C -1.070715 -2.622289 -0.305623
C 1.187864 -2.653102 -0.725979
C -5.130311 0.230504 0.125898
H -4.002507 -1.355969 1.070730
C -3.991100 2.348522 -0.093862
C -1.628253 2.613115 0.553255
C 0.653368 3.042096 0.519627

```



|   |           |           |           |
|---|-----------|-----------|-----------|
| C | 0.423733  | -0.599048 | 2.946640  |
| C | 0.437890  | 0.672247  | -2.170058 |
| C | -1.541584 | -3.244711 | 0.850625  |
| C | -1.824562 | -2.639677 | -1.480275 |
| C | 2.602348  | -2.262974 | -0.823154 |
| H | 0.959448  | -3.663176 | -1.096560 |
| C | -5.129377 | 1.566753  | -0.278122 |
| H | -6.022059 | -0.383459 | -0.019275 |
| H | -3.983310 | 3.393141  | -0.415565 |
| H | -1.756291 | 3.703753  | 0.585261  |
| C | 1.686163  | 2.903221  | 1.449362  |
| C | 0.706395  | 4.046344  | -0.450111 |
| C | 1.221141  | -0.836114 | 4.208888  |
| C | 0.804002  | 1.060243  | -3.566997 |
| C | -2.771822 | -3.901066 | 0.822609  |
| H | -0.949509 | -3.195562 | 1.764941  |
| C | -3.056660 | -3.291719 | -1.495920 |
| H | -1.442789 | -2.130522 | -2.366594 |
| C | 3.366157  | -2.898135 | -1.813624 |
| C | 3.213801  | -1.337181 | 0.033547  |
| H | -6.018548 | 2.001418  | -0.739366 |
| C | 2.758063  | 3.791920  | 1.421247  |
| H | 1.644632  | 2.082664  | 2.166268  |
| C | 1.788749  | 4.926216  | -0.475375 |
| H | -0.085896 | 4.121915  | -1.198632 |
| H | 0.569011  | -1.170269 | 5.024378  |
| H | 1.985796  | -1.603172 | 4.014841  |
| H | 1.745685  | 0.084828  | 4.501025  |
| H | -0.052835 | 0.938690  | -4.239072 |
| H | 1.646800  | 0.444364  | -3.909731 |
| H | 1.130576  | 2.110546  | -3.570027 |
| C | -3.531928 | -3.926481 | -0.347545 |
| H | -3.138197 | -4.394892 | 1.725434  |
| H | -3.647257 | -3.304692 | -2.414628 |
| C | 4.711754  | -2.579163 | -1.980070 |
| H | 2.895772  | -3.639047 | -2.465855 |
| C | 4.563744  | -1.037261 | -0.123948 |
| H | 2.630326  | -0.866296 | 0.826060  |
| C | 2.813681  | 4.805532  | 0.461896  |
| H | 3.561604  | 3.687139  | 2.153766  |
| H | 1.830720  | 5.705451  | -1.239528 |
| H | -4.496359 | -4.438649 | -0.363791 |
| C | 5.312024  | -1.646035 | -1.134203 |
| H | 5.294245  | -3.066503 | -2.764688 |
| H | 5.037765  | -0.319289 | 0.549188  |
| H | 3.660843  | 5.494419  | 0.440025  |
| H | 6.369555  | -1.399983 | -1.255397 |

\*

**cis-TS(F<sup>A</sup>-G<sup>A</sup>)<sub>2</sub>**

CPCM (MeOH)  
M06 SCF (DZ) = -1664.112029  
G (1 atm) = -1663.674318  
qh-G (1 mol/L) = -1663.664186  
qh-G (24.56 mol/L) = -1663.661164  
Lowest Frequency = -1224.78

HF SCF energy (TZ) = -1655.100673  
HF SCF energy (QZ) = -1655.199453  
Correlation energy (DZ) = -5.876654  
Correlation energy (TZ) = -7.189370  
DLPNO-CCSD(T1)/CBS = -1663.185653

PBE0+D3BJ (ATZ) = -1663.976735  
M06-2X (ATZ) = -1664.994049

**cis-TS(F<sup>A</sup>-G<sup>A</sup>)<sub>2</sub>**

CPCM (MeOH)  
wB97X-D3 SCF (DZ) = -1664.881340  
G (1 atm) = -1664.427266  
qh G-E (1 mol/L) = 0.467178  
qh G-E (24.56 mol/L) = 0.470200  
Lowest Frequency = -1201.08

HF SCF energy (TZ) = -1655.107416  
HF SCF energy (QZ) = -1655.206079  
Correlation energy (DZ) = -5.869774  
Correlation energy (TZ) = -7.182639  
DLPNO-CCSD(T1)/CBS = -1663.185599

PBE0+D3BJ (ATZ) = -1663.974902  
M06-2X (ATZ) = -1664.995384

wB97M-V (ATZ) = -1665.091724  
 B2GP-PLYP (ATZ) = -1664.092813  
 B2K-PLYP (ATZ) = -1663.874959  
 PWPB95 (ATZ) = -1664.526447  
 PWPB95+D3BJ (ATZ) = -1664.576851  
 PWPB95+D4 (ATZ) = -1664.597740

wB97M-V (ATZ) = -1665.092658  
 B2GP-PLYP (ATZ) = -1664.090324  
 B2K-PLYP (ATZ) = -1663.872515  
 PWPB95 (ATZ) = -1664.523993  
 PWPB95+D3BJ (ATZ) = -1664.574528  
 PWPB95+D4 (ATZ) = -1664.595306

\*xyz 0 1

|    |           |           |           |
|----|-----------|-----------|-----------|
| Ru | -0.885225 | 0.130366  | 0.175705  |
| C  | -2.501444 | -1.098676 | -0.297287 |
| N  | -0.048430 | -1.068370 | -1.306664 |
| C  | -2.127506 | -2.145447 | -1.189626 |
| H  | -2.503757 | 0.248792  | -0.753683 |
| C  | -3.751955 | -1.230442 | 0.338854  |
| N  | 0.991319  | 1.023872  | 0.873262  |
| O  | -0.877157 | 1.658387  | -1.262109 |
| O  | -1.964622 | 0.993595  | 1.849445  |
| O  | -0.996945 | -0.940902 | 2.055347  |
| C  | 1.279511  | -0.981432 | -1.811834 |
| C  | -0.816363 | -2.026180 | -1.753117 |
| C  | -2.962142 | -3.246757 | -1.432784 |
| O  | -3.049754 | 1.281977  | -1.488148 |
| C  | -4.568023 | -2.333385 | 0.110279  |
| H  | -4.094137 | -0.436632 | 1.012332  |
| C  | 1.020395  | 2.453901  | 0.740393  |
| C  | 2.110532  | 0.518737  | 1.286089  |
| C  | -2.013938 | 1.951661  | -1.749064 |
| C  | -1.707152 | -0.020684 | 2.567153  |
| C  | 1.799486  | 0.261138  | -2.183118 |
| C  | 2.081140  | -2.124788 | -1.907660 |
| H  | -0.458005 | -2.714280 | -2.531423 |
| C  | -4.182908 | -3.343440 | -0.781771 |
| H  | -2.632247 | -4.031479 | -2.121261 |
| H  | -5.531015 | -2.407497 | 0.624407  |
| C  | 0.056723  | 3.241852  | 1.373772  |
| C  | 2.003325  | 3.061968  | -0.046361 |
| C  | 2.538976  | -0.867493 | 1.438898  |
| H  | 2.906765  | 1.236231  | 1.547672  |
| C  | -2.086646 | 3.126102  | -2.671666 |
| C  | -2.257682 | -0.155640 | 3.945068  |
| C  | 3.109985  | 0.352385  | -2.644255 |
| H  | 1.158072  | 1.142852  | -2.112078 |
| C  | 3.392114  | -2.023797 | -2.364001 |
| H  | 1.684544  | -3.091548 | -1.585102 |
| H  | -4.837981 | -4.199562 | -0.959275 |
| C  | 0.086451  | 4.624557  | 1.223100  |
| H  | -0.712834 | 2.757795  | 1.977033  |
| C  | 2.018831  | 4.446439  | -0.201158 |
| H  | 2.742506  | 2.440695  | -0.560234 |
| C  | 1.730891  | -2.009174 | 1.312528  |
| C  | 3.907658  | -1.040327 | 1.715246  |
| H  | -1.727469 | 2.820887  | -3.666697 |
| H  | -1.426779 | 3.928032  | -2.312687 |
| H  | -3.117577 | 3.487204  | -2.767633 |
| H  | -2.422392 | 0.829747  | 4.399249  |
| H  | -3.229954 | -0.670885 | 3.882139  |
| H  | -1.593019 | -0.764395 | 4.571533  |
| C  | 3.913328  | -0.784380 | -2.730631 |
| H  | 3.507920  | 1.326971  | -2.941193 |
| H  | 4.013681  | -2.921277 | -2.419694 |
| C  | 1.061465  | 5.233960  | 0.432892  |
| H  | -0.665274 | 5.234743  | 1.730771  |
| H  | 2.785589  | 4.908969  | -0.827979 |
| C  | 2.282951  | -3.275167 | 1.462433  |
| H  | 0.667742  | -1.899367 | 1.103844  |
| C  | 4.460244  | -2.308183 | 1.844676  |

SMD (MeOH)

HF SCF energy (TZ) = -1655.122195  
 HF SCF energy (QZ) = -1655.220673  
 Correlation energy (DZ) = -5.863936  
 Correlation energy (TZ) = -7.177996  
 DLPNO-CCSD(T1)/CBS = -1663.196194

\*xyz 0 1

|    |           |           |           |
|----|-----------|-----------|-----------|
| Ru | -0.889741 | 0.191328  | 0.209243  |
| C  | -2.581135 | -0.916446 | -0.371448 |
| N  | -0.052996 | -1.107681 | -1.203945 |
| C  | -2.211725 | -2.038274 | -1.159583 |
| C  | -3.881243 | -0.929773 | 0.169527  |
| C  | 1.288216  | -1.097845 | -1.702268 |
| C  | -0.851971 | -2.025383 | -1.653490 |
| C  | -3.085867 | -3.108870 | -1.395937 |
| C  | -4.747307 | -1.999140 | -0.048767 |
| C  | 1.843143  | 0.107844  | -2.136791 |
| C  | 2.044586  | -2.272671 | -1.748863 |
| C  | -4.358075 | -3.090400 | -0.837108 |
| C  | 3.148263  | 0.132667  | -2.623631 |
| C  | 3.350689  | -2.238691 | -2.232755 |
| C  | 3.907542  | -1.037851 | -2.671983 |
| H  | -4.220185 | -0.080180 | 0.769519  |
| H  | -0.504839 | -2.759740 | -2.390629 |
| H  | -2.758105 | -3.955767 | -2.005094 |
| H  | -5.748046 | -1.982120 | 0.391104  |
| H  | 1.236217  | 1.012926  | -2.090657 |
| H  | 1.622917  | -3.206301 | -1.371565 |
| H  | -5.048902 | -3.918145 | -1.009749 |
| H  | 3.573853  | 1.077454  | -2.969695 |
| H  | 3.940801  | -3.157594 | -2.249215 |
| H  | 4.933774  | -1.012749 | -3.044661 |
| H  | -2.412262 | 0.393122  | -0.969284 |
| N  | 1.028855  | 0.996150  | 0.984032  |
| C  | 1.091964  | 2.436009  | 0.919509  |
| C  | 2.152659  | 0.454517  | 1.306652  |
| C  | 0.256320  | 3.212481  | 1.722999  |
| C  | 1.985128  | 3.053638  | 0.040137  |
| C  | 2.513539  | -0.967636 | 1.399344  |
| C  | 0.317190  | 4.602714  | 1.642055  |
| C  | 2.034104  | 4.444217  | -0.042036 |
| C  | 1.611945  | -2.015248 | 1.629401  |
| C  | 3.879784  | -1.255889 | 1.257553  |
| C  | 1.199559  | 5.224617  | 0.757336  |
| C  | 2.074734  | -3.326512 | 1.691254  |
| C  | 4.335087  | -2.570219 | 1.297975  |
| C  | 3.430609  | -3.609438 | 1.514720  |
| H  | 2.995087  | 1.131197  | 1.514066  |
| H  | -0.445948 | 2.720810  | 2.394941  |
| H  | 2.626692  | 2.440798  | -0.595991 |
| H  | -0.334750 | 5.206150  | 2.277817  |
| H  | 2.728365  | 4.917025  | -0.740321 |
| H  | 0.557551  | -1.796776 | 1.787130  |
| H  | 4.588243  | -0.439171 | 1.095685  |
| H  | 1.236298  | 6.314102  | 0.691198  |
| H  | 1.368109  | -4.137684 | 1.879582  |
| H  | 5.397974  | -2.782644 | 1.166897  |
| H  | 3.784334  | -4.642082 | 1.557404  |

|   |          |           |           |
|---|----------|-----------|-----------|
| H | 4.545770 | -0.157567 | 1.820162  |
| H | 4.944703 | -0.703757 | -3.082545 |
| H | 1.072818 | 6.319899  | 0.311196  |
| C | 3.645092 | -3.431659 | 1.720124  |
| H | 1.641543 | -4.155058 | 1.367317  |
| H | 5.527484 | -2.420007 | 2.049080  |
| H | 4.070744 | -4.432479 | 1.828217  |

\*

-----

**TS(F<sup>A</sup>-G<sup>A</sup>)<sub>2</sub>**

CPCM (MeOH)

|                      |              |
|----------------------|--------------|
| M06 SCF (DZ) =       | -1664.111476 |
| G (1 atm) =          | -1663.674285 |
| qh-G (1 mol/L) =     | -1663.663828 |
| qh-G (24.56 mol/L) = | -1663.660805 |
| Lowest Frequency =   | -1264.46     |

|                           |              |
|---------------------------|--------------|
| HF SCF energy (TZ) =      | -1655.099952 |
| HF SCF energy (QZ) =      | -1655.200359 |
| Correlation energy (DZ) = | -5.875218    |
| Correlation energy (TZ) = | -7.187225    |
| DLPNO-CCSD(T1)/CBS =      | -1663.184490 |

\*xyz 0 1

|    |           |           |           |
|----|-----------|-----------|-----------|
| Ru | -0.338553 | -0.012652 | -0.042207 |
| C  | 0.795600  | -1.144801 | 1.277538  |
| N  | -1.756676 | -1.373145 | 0.602716  |
| H  | 0.261414  | 0.067778  | 1.761024  |
| C  | 0.116344  | -2.362791 | 1.595693  |
| C  | 2.144315  | -1.062912 | 1.684417  |
| N  | 1.226992  | 1.330041  | -0.649957 |
| O  | -1.395086 | 0.320905  | -1.945775 |
| O  | -1.213563 | 1.537235  | 1.045303  |
| O  | -0.083285 | -1.400078 | -1.683011 |
| C  | -3.110236 | -1.375007 | 0.181454  |
| C  | -1.271845 | -2.400057 | 1.243694  |
| O  | 0.058650  | 0.987463  | 2.768979  |
| C  | 0.774577  | -3.445693 | 2.198847  |
| C  | 2.793188  | -2.138817 | 2.277163  |
| H  | 2.689372  | -0.123717 | 1.542748  |
| C  | 0.777680  | 2.693057  | -0.548730 |
| C  | 2.490411  | 1.239523  | -0.927171 |
| C  | -0.908316 | -0.752004 | -2.407675 |
| C  | -0.817101 | 1.722954  | 2.237912  |
| C  | -3.658701 | -2.489462 | -0.460867 |
| C  | -3.885745 | -0.227648 | 0.376077  |
| H  | -1.916705 | -3.245276 | 1.524646  |
| C  | 2.117838  | -3.342414 | 2.526039  |
| H  | 0.218807  | -4.366941 | 2.401409  |
| H  | 3.845437  | -2.040921 | 2.562308  |
| C  | -0.153380 | 3.190163  | -1.459692 |
| C  | 1.254430  | 3.499679  | 0.484950  |
| C  | 3.354178  | 0.070235  | -1.059557 |
| H  | 3.033170  | 2.193359  | -1.042512 |
| C  | -1.317878 | -1.276694 | -3.741797 |
| C  | -1.427563 | 2.838628  | 3.022633  |
| C  | -4.988045 | -2.464397 | -0.878094 |
| H  | -3.031487 | -3.365038 | -0.653291 |

|   |           |           |           |
|---|-----------|-----------|-----------|
| O | -0.673824 | 1.736919  | -1.200311 |
| O | -2.745708 | 1.307510  | -1.833243 |
| C | -1.677640 | 1.985615  | -1.926930 |
| C | -1.577349 | 3.085131  | -2.940372 |
| H | -1.167590 | 2.657594  | -3.868327 |
| H | -0.890067 | 3.863229  | -2.587365 |
| H | -2.566152 | 3.505280  | -3.157339 |
| O | -1.969025 | 1.119352  | 1.856806  |
| O | -1.222172 | -0.912200 | 2.045582  |
| C | -1.854748 | 0.066751  | 2.553814  |
| C | -2.472496 | -0.042145 | 3.913563  |
| H | -2.598806 | 0.950786  | 4.361174  |
| H | -3.463837 | -0.508613 | 3.806070  |
| H | -1.859574 | -0.682818 | 4.559630  |

\*

-----

**TS(F<sup>A</sup>-G<sup>A</sup>)<sub>2</sub>**

CPCM (MeOH)

|                        |              |
|------------------------|--------------|
| wB97X-D3 SCF (DZ) =    | -1664.880050 |
| G (1 atm) =            | -1664.426861 |
| qh G-E (1 mol/L) =     | 0.467475     |
| qh G-E (24.56 mol/L) = | 0.470498     |
| Lowest Frequency =     | -1267.03     |

|                           |              |
|---------------------------|--------------|
| HF SCF energy (TZ) =      | -1655.108552 |
| HF SCF energy (QZ) =      | -1655.207085 |
| Correlation energy (DZ) = | -5.868614    |
| Correlation energy (TZ) = | -7.180264    |
| DLPNO-CCSD(T1)/CBS =      | -1663.183482 |

SMD (MeOH)

|                           |              |
|---------------------------|--------------|
| HF SCF energy (TZ) =      | -1655.123973 |
| HF SCF energy (QZ) =      | -1655.222333 |
| Correlation energy (DZ) = | -5.862895    |
| Correlation energy (TZ) = | -7.175678    |
| DLPNO-CCSD(T1)/CBS =      | -1663.194754 |

\*xyz 0 1

|    |           |           |           |
|----|-----------|-----------|-----------|
| Ru | -0.315271 | -0.036351 | -0.029543 |
| C  | 0.798491  | -1.168957 | 1.307068  |
| N  | -1.752411 | -1.386645 | 0.599744  |
| H  | 0.276255  | 0.054502  | 1.775980  |
| C  | 0.104454  | -2.374203 | 1.623981  |
| C  | 2.152322  | -1.119873 | 1.704339  |
| N  | 1.256155  | 1.342875  | -0.637528 |
| O  | -1.369531 | 0.300840  | -1.909675 |
| O  | -1.199108 | 1.520369  | 1.032842  |
| O  | -0.059194 | -1.422807 | -1.690413 |
| C  | -3.118123 | -1.373635 | 0.192025  |
| C  | -1.295450 | -2.399642 | 1.264388  |
| O  | 0.043053  | 0.975022  | 2.776564  |
| C  | 0.738481  | -3.472810 | 2.222786  |
| C  | 2.785498  | -2.210161 | 2.291599  |
| H  | 2.717183  | -0.195978 | 1.562385  |
| C  | 0.791874  | 2.708199  | -0.561146 |
| C  | 2.511627  | 1.265691  | -0.923886 |
| C  | -0.888498 | -0.765156 | -2.398164 |
| C  | -0.830940 | 1.706227  | 2.234073  |
| C  | -3.659664 | -2.450149 | -0.514789 |
| C  | -3.900979 | -0.252067 | 0.478885  |
| H  | -1.951915 | -3.230246 | 1.552815  |
| C  | 2.086379  | -3.397947 | 2.546763  |
| H  | 0.165689  | -4.381458 | 2.427646  |
| H  | 3.840270  | -2.133532 | 2.568777  |
| C  | -0.119694 | 3.183263  | -1.503209 |

|   |           |           |           |
|---|-----------|-----------|-----------|
| C | -5.213248 | -0.215751 | -0.036061 |
| H | -3.424895 | 0.641220  | 0.852696  |
| H | 2.640752  | -4.181395 | 2.990953  |
| C | -0.605577 | 4.499774  | -1.329027 |
| H | -0.527164 | 2.534298  | -2.248918 |
| C | 0.787968  | 4.806245  | 0.614542  |
| H | 1.970385  | 3.083360  | 1.201315  |
| C | 2.928255  | -1.216391 | -1.416951 |
| C | 4.718165  | 0.290673  | -0.801652 |
| H | -1.583447 | -0.452373 | -4.416219 |
| H | -2.212217 | -1.906454 | -3.608059 |
| H | -0.526108 | -1.896661 | -4.181356 |
| H | -2.150791 | 2.418503  | 3.739062  |
| H | -1.946933 | 3.546550  | 2.364696  |
| H | -0.651096 | 3.354869  | 3.604171  |
| C | -5.770224 | -1.332477 | -0.661842 |
| H | -5.410572 | -3.336132 | -1.384138 |
| H | -5.820730 | 0.677707  | 0.129452  |
| C | -0.143348 | 5.309756  | -0.291173 |
| H | -1.330862 | 4.892302  | -2.046554 |
| H | 1.154422  | 5.431920  | 1.432648  |
| C | 3.847058  | -2.257265 | -1.485097 |
| H | 1.878123  | -1.391859 | -1.651882 |
| C | 5.626934  | -0.759789 | -0.839416 |
| H | 5.060216  | 1.298778  | -0.547484 |
| H | -6.812129 | -1.314572 | -0.990656 |
| H | -0.509461 | 6.334364  | -0.189780 |
| C | 5.190830  | -2.039492 | -1.180976 |
| H | 3.508998  | -3.255576 | -1.774719 |
| H | 6.680497  | -0.578134 | -0.614316 |
| H | 5.904001  | -2.866680 | -1.224476 |

\*

-----

|   |           |           |           |
|---|-----------|-----------|-----------|
| C | 1.241202  | 3.534666  | 0.469079  |
| C | 3.385462  | 0.089088  | -1.053603 |
| H | 3.045455  | 2.217642  | -1.060368 |
| C | -1.319087 | -1.266082 | -3.741905 |
| C | -1.473249 | 2.812301  | 3.016936  |
| C | -4.995398 | -2.410749 | -0.916073 |
| H | -3.028667 | -3.306112 | -0.764986 |
| C | -5.234404 | -0.224911 | 0.080552  |
| H | -3.447191 | 0.587776  | 1.007479  |
| H | 2.591199  | -4.247035 | 3.011858  |
| C | -0.583063 | 4.493573  | -1.407660 |
| H | -0.473116 | 2.513219  | -2.287646 |
| C | 0.765116  | 4.842427  | 0.562673  |
| H | 1.942205  | 3.141667  | 1.209293  |
| C | 2.962255  | -1.190324 | -1.432654 |
| C | 4.745238  | 0.311435  | -0.781981 |
| H | -1.616038 | -0.428863 | -4.385036 |
| H | -2.192472 | -1.920610 | -3.597525 |
| H | -0.519737 | -1.851534 | -4.211782 |
| H | -2.160228 | 2.367876  | 3.752817  |
| H | -2.033876 | 3.483845  | 2.357021  |
| H | -0.704806 | 3.369364  | 3.568605  |
| C | -5.786494 | -1.302856 | -0.615958 |
| H | -5.415582 | -3.252353 | -1.471025 |
| H | -5.848649 | 0.647386  | 0.314497  |
| C | -0.148339 | 5.325466  | -0.373792 |
| H | -1.295293 | 4.866546  | -2.147057 |
| C | 1.108608  | 5.483667  | 1.377410  |
| H | 3.884601  | -2.229979 | -1.514004 |
| H | 1.913977  | -1.367160 | -1.667552 |
| C | 5.659499  | -0.736456 | -0.838681 |
| H | 5.083005  | 1.314010  | -0.506346 |
| H | -6.831520 | -1.274301 | -0.931648 |
| H | -0.523656 | 6.348235  | -0.298732 |
| C | 5.228360  | -2.011789 | -1.205966 |
| H | 3.548941  | -3.224552 | -1.815583 |
| H | 6.711061  | -0.554646 | -0.607728 |
| H | 5.943773  | -2.835373 | -1.263237 |

\*

-----

#### TS(F<sup>c</sup>-G<sup>c</sup>)1

CPCM (MeOH)  
M06 SCF (DZ) = -1496.948782  
G (1 atm) = -1496.499343  
qh-G (1 mol/L) = -1496.488861  
qh-G (24.56 mol/L) = -1496.485838  
Lowest Frequency = -71.83

HF SCF energy (TZ) = -1488.775095  
HF SCF energy (QZ) = -1488.865598  
Correlation energy (DZ) = -5.339143  
Correlation energy (TZ) = -6.545609  
DLPNO-CCSD(T1)/CBS = -1496.143458

PBE0+D3BJ (ATZ) = -1496.833198  
M06-2X (ATZ) = -1497.716326  
wB97M-V (ATZ) = -1497.794599  
B2GP-PLYP (ATZ) = -1496.903294  
B2K-PLYP (ATZ) = -1496.705013  
PWPB95 (ATZ) = -1497.298074  
PWPB95+D3BJ (ATZ) = -1497.343420  
PWPB95+D4 (ATZ) = -1497.364029

\*xyz 0 1

Ru -0.079692 -0.242430 0.349160

#### TS(F<sup>c</sup>-G<sup>c</sup>)1

CPCM (MeOH)  
wB97X-D3 SCF (DZ) = -1497.654045  
G (1 atm) = -1497.187470  
qh G-E (1 mol/L) = 0.479009  
qh G-E (24.56 mol/L) = 0.482032  
Lowest Frequency = -37.28

HF SCF energy (TZ) = -1488.778756  
HF SCF energy (QZ) = -1488.867757  
Correlation energy (DZ) = -5.338506  
Correlation energy (TZ) = -6.544363  
DLPNO-CCSD(T1)/CBS = -1496.143563

PBE0+D3BJ (ATZ) = -1496.834655  
M06-2X (ATZ) = -1497.735544  
wB97M-V (ATZ) = -1497.802896  
B2GP-PLYP (ATZ) = -1496.921987  
B2K-PLYP (ATZ) = -1496.728697  
PWPB95 (ATZ) = -1497.310560  
PWPB95+D3BJ (ATZ) = -1497.356978  
PWPB95+D4 (ATZ) = -1497.376950

SMD (MeOH)

HF SCF energy (TZ) = -1488.794978

|   |           |           |           |
|---|-----------|-----------|-----------|
| C | 2.046044  | -1.217820 | 0.471239  |
| C | 1.121382  | -2.099062 | 1.075677  |
| C | 2.646523  | -1.561108 | -0.780248 |
| H | 2.497737  | -0.426451 | 1.082984  |
| C | 0.985545  | 2.505192  | 0.796044  |
| H | 0.676719  | 1.695087  | 1.475278  |
| O | 0.801594  | 0.432722  | 3.110070  |
| N | -1.513643 | 1.226087  | -0.099338 |
| O | 0.297389  | -0.119708 | -1.794830 |
| O | -1.130349 | -1.478623 | -0.906361 |
| O | -0.988544 | -0.532468 | 2.206374  |
| C | 0.729468  | -3.304004 | 0.420461  |
| H | 0.899465  | -2.007164 | 2.141189  |
| C | 3.764998  | -0.736880 | -1.374112 |
| C | 2.241854  | -2.727980 | -1.391181 |
| C | 2.230645  | 3.088248  | 0.993653  |
| C | 0.100549  | 3.037936  | -0.152346 |
| C | -0.315496 | -0.096319 | 3.215570  |
| C | -2.847198 | 0.807263  | -0.402983 |
| C | -1.210648 | 2.453135  | -0.372900 |
| C | -0.573772 | -1.019095 | -1.963614 |
| C | -0.279249 | -4.186962 | 1.077674  |
| C | 1.281378  | -3.587420 | -0.807744 |
| C | 3.523674  | 0.763997  | -1.309507 |
| C | 5.087943  | -1.091595 | -0.695517 |
| H | 3.843879  | -1.030419 | -2.438341 |
| H | 2.693525  | -3.008180 | -2.349909 |
| C | 2.615033  | 4.191835  | 0.230652  |
| H | 2.902098  | 2.678952  | 1.753966  |
| C | 0.479191  | 4.166163  | -0.891995 |
| C | -0.988207 | -0.265726 | 4.551995  |
| C | -3.596417 | 0.148306  | 0.573422  |
| C | -3.379348 | 1.023073  | -1.676140 |
| H | -1.986390 | 3.108674  | -0.799399 |
| C | -0.940212 | -1.546319 | -3.303782 |
| H | -1.255310 | -3.673366 | 1.139159  |
| H | 0.012689  | -4.431393 | 2.112952  |
| H | -0.423800 | -5.128263 | 0.527201  |
| H | 0.991862  | -4.504547 | -1.331851 |
| H | 2.561611  | 1.046319  | -1.765708 |
| H | 3.517510  | 1.119444  | -0.265363 |
| H | 4.331520  | 1.305014  | -1.829506 |
| H | 5.924145  | -0.527620 | -1.141597 |
| H | 5.052483  | -0.841992 | 0.380085  |
| H | 5.311361  | -2.167164 | -0.783480 |
| C | 1.739111  | 4.728044  | -0.713166 |
| H | 3.597881  | 4.645023  | 0.381732  |
| H | -0.217648 | 4.591293  | -1.620153 |
| H | -1.881468 | 0.376699  | 4.596985  |
| H | -1.331298 | -1.302906 | 4.678873  |
| H | -0.307916 | 0.007194  | 5.368468  |
| C | -4.891404 | -0.264229 | 0.277370  |
| H | -3.140052 | -0.038222 | 1.548365  |
| C | -4.672913 | 0.593915  | -1.965679 |
| H | -2.767285 | 1.502804  | -2.446245 |
| H | -0.810575 | -0.768477 | -4.067802 |
| H | -0.267929 | -2.383942 | -3.550070 |
| H | -1.972310 | -1.920940 | -3.305365 |
| H | 2.036180  | 5.597039  | -1.304612 |
| C | -5.433843 | -0.044320 | -0.989422 |
| H | -5.483413 | -0.769289 | 1.044849  |
| H | -5.083475 | 0.755990  | -2.965363 |
| H | -6.448373 | -0.379877 | -1.217545 |

\*

-----

HF SCF energy (QZ) = -1488.883762  
 Correlation energy (DZ) = -5.331916  
 Correlation energy (TZ) = -6.538885  
 DLPNO-CCSD(T1)/CBS = -1496.154674

\*xyz 0 1

|    |           |           |           |
|----|-----------|-----------|-----------|
| Ru | -0.432224 | 0.805777  | 0.132237  |
| C  | 2.045464  | -0.474838 | -1.715285 |
| O  | 0.945633  | 2.446215  | -1.860747 |
| N  | -0.795289 | -1.049017 | -0.775419 |
| O  | -0.675353 | 2.756583  | 1.047649  |
| O  | -2.264464 | 1.291065  | 0.942160  |
| O  | -1.141324 | 1.729265  | -1.569015 |
| C  | 3.413167  | -0.395437 | -1.963806 |
| C  | 1.422067  | -1.722614 | -1.622294 |
| C  | -0.251189 | 2.428906  | -2.188270 |
| C  | -2.174229 | -1.471908 | -0.719993 |
| C  | -0.012161 | -1.880417 | -1.374545 |
| C  | -1.893059 | 2.475255  | 1.249674  |
| C  | 4.170659  | -1.558818 | -2.101982 |
| C  | 2.180630  | -2.889341 | -1.797601 |
| C  | -0.761901 | 3.257598  | -3.343258 |
| C  | -3.168841 | -0.629232 | -1.221063 |
| C  | -2.509308 | -2.722115 | -0.196791 |
| C  | -2.867814 | 3.477518  | 1.774352  |
| C  | 3.552168  | -2.808159 | -2.017759 |
| C  | -4.497531 | -1.045396 | -1.194966 |
| C  | -3.843697 | -3.126084 | -0.164906 |
| C  | -4.841260 | -2.289869 | -0.663634 |
| H  | 1.470925  | 0.455050  | -1.648479 |
| H  | 3.888452  | 0.584006  | -2.049872 |
| H  | -0.450078 | -2.813601 | -1.752603 |
| H  | 5.245084  | -1.492285 | -2.286879 |
| H  | 1.690047  | -3.864492 | -1.742989 |
| H  | 0.050285  | 3.472492  | -4.048713 |
| H  | -1.586518 | 2.746002  | -3.856435 |
| H  | -1.146638 | 4.210446  | -2.947948 |
| H  | -2.885671 | 0.340706  | -1.630298 |
| H  | -1.726234 | -3.373838 | 0.195118  |
| H  | -2.346931 | 4.240423  | 2.364468  |
| H  | -3.352203 | 3.965383  | 0.914896  |
| H  | -3.642260 | 2.983001  | 2.373207  |
| H  | 4.139590  | -3.721057 | -2.134016 |
| H  | -5.272526 | -0.387623 | -1.594367 |
| H  | -4.100297 | -4.100524 | 0.256129  |
| H  | -5.886101 | -2.606732 | -0.639761 |
| C  | 0.994829  | 0.529114  | 1.954235  |
| C  | -0.145785 | -0.230100 | 2.286421  |
| C  | 2.213622  | -0.122537 | 1.600250  |
| C  | -0.090554 | -1.651833 | 2.309988  |
| C  | 3.498503  | 0.666917  | 1.416822  |
| C  | 2.212931  | -1.502299 | 1.542699  |
| C  | -1.256834 | -2.420350 | 2.868916  |
| C  | 1.075694  | -2.263643 | 1.895173  |
| C  | 3.294027  | 2.042243  | 0.776933  |
| C  | 4.216701  | 0.803049  | 2.767508  |
| H  | 1.014269  | 1.589732  | 2.209605  |
| H  | -0.997536 | 0.257570  | 2.764932  |
| H  | 4.143453  | 0.069060  | 0.750821  |
| H  | 3.128494  | -2.024465 | 1.248407  |
| H  | -2.210804 | -2.045420 | 2.470784  |
| H  | -1.293044 | -2.303864 | 3.964571  |
| H  | -1.180996 | -3.493803 | 2.646674  |
| H  | 1.139955  | -3.355113 | 1.880227  |
| H  | 2.714871  | 1.988675  | -0.156632 |
| H  | 2.760466  | 2.726477  | 1.456761  |

|   |          |           |          |
|---|----------|-----------|----------|
| H | 4.268197 | 2.502615  | 0.550968 |
| H | 5.178786 | 1.325966  | 2.648186 |
| H | 3.601770 | 1.382366  | 3.476542 |
| H | 4.413792 | -0.182065 | 3.216873 |

\*

-----

**TS(F<sup>c</sup>-G<sup>c</sup>)2**

CPCM (MeOH)  
wB97X-D3 SCF (DZ) = -1497.650864  
G (1 atm) = -1497.190627  
qh G-E (1 mol/L) = 0.474742  
qh G-E (24.56 mol/L) = 0.477765  
Lowest Frequency = -1275.87

HF SCF energy (TZ) = -1488.740922  
HF SCF energy (QZ) = -1488.829788  
Correlation energy (DZ) = -5.373448  
Correlation energy (TZ) = -6.581538  
DLPNO-CCSD(T1)/CBS = -1496.144032

PBE0+D3BJ (ATZ) = -1496.837185  
M06-2X (ATZ) = -1497.727951  
wB97M-V (ATZ) = -1497.796353  
B2GP-PLYP (ATZ) = -1496.921694  
B2K-PLYP (ATZ) = -1496.728527  
PWPB95 (ATZ) = -1497.309272  
PWPB95+D3BJ (ATZ) = -1497.356787  
PWPB95+D4 (ATZ) = -1497.377166

**SMD (MeOH)**

HF SCF energy (TZ) = -1488.754719  
HF SCF energy (QZ) = -1488.843438  
Correlation energy (DZ) = -5.367819  
Correlation energy (TZ) = -6.577095  
DLPNO-CCSD(T1)/CBS = -1496.153888

\*xyz 0 1

|    |           |           |           |
|----|-----------|-----------|-----------|
| Ru | 0.260953  | 0.718570  | 0.234627  |
| C  | -0.766457 | -0.663426 | 1.446818  |
| C  | -1.964778 | -0.513830 | 2.169042  |
| C  | -0.326855 | -1.992060 | 1.210735  |
| N  | 1.425540  | -0.986418 | 0.032451  |
| O  | 1.783067  | 1.539384  | 1.349075  |
| C  | -2.699473 | -1.620815 | 2.586026  |
| C  | -1.057960 | -3.110277 | 1.635084  |
| C  | 0.933002  | -2.089249 | 0.506369  |
| O  | 0.915247  | 0.539322  | 3.118191  |
| C  | 2.738490  | -0.982558 | -0.520261 |
| C  | 1.800485  | 1.272799  | 2.589167  |
| C  | -2.251867 | -2.922544 | 2.319316  |
| C  | 3.011049  | -0.161896 | -1.619010 |
| C  | 3.762474  | -1.752542 | 0.043525  |
| C  | 2.917277  | 1.812950  | 3.427626  |
| C  | 4.287921  | -0.146206 | -2.174356 |
| C  | 5.038808  | -1.728513 | -0.516172 |
| C  | 5.305146  | -0.931477 | -1.629205 |
| H  | -2.322579 | 0.490397  | 2.413867  |
| H  | -3.632210 | -1.473700 | 3.137069  |
| H  | -0.690390 | -4.117036 | 1.419114  |
| H  | 1.459634  | -3.044312 | 0.391477  |
| H  | -2.835292 | -3.782257 | 2.655454  |
| H  | 2.218417  | 0.463692  | -2.030073 |
| H  | 3.568774  | -2.350007 | 0.936876  |
| H  | 3.708776  | 1.049305  | 3.471516  |
| H  | 3.332160  | 2.722991  | 2.979792  |

**TS(F<sup>c</sup>-G<sup>c</sup>)2**

CPCM (MeOH)  
M06 SCF (DZ) = -1496.948021  
G (1 atm) = -1496.502568  
qh-G (1 mol/L) = -1496.492655  
qh-G (24.56 mol/L) = -1496.489632  
Lowest Frequency = -1325.57

HF SCF energy (TZ) = -1488.719478  
HF SCF energy (QZ) = -1488.809549  
Correlation energy (DZ) = -5.394410  
Correlation energy (TZ) = -6.602948  
DLPNO-CCSD(T1)/CBS = -1496.145830

PBE0+D3BJ (ATZ) = -1496.838839  
M06-2X (ATZ) = -1497.705880  
wB97M-V (ATZ) = -1497.790158  
B2GP-PLYP (ATZ) = -1496.905003  
B2K-PLYP (ATZ) = -1496.707675  
PWPB95 (ATZ) = -1497.299379  
PWPB95+D3BJ (ATZ) = -1497.347416  
PWPB95+D4 (ATZ) = -1497.366707

\*xyz 0 1

|    |           |           |           |
|----|-----------|-----------|-----------|
| Ru | 0.148148  | 0.673374  | 0.097336  |
| C  | -0.839627 | -0.721451 | 1.324828  |
| C  | -1.830331 | 0.480411  | -1.365916 |
| C  | -2.013697 | -0.565469 | 2.085215  |
| C  | -0.356385 | -2.049675 | 1.154256  |
| H  | 0.125579  | 0.054701  | 1.901680  |
| C  | -0.759658 | -0.170979 | -2.013848 |
| N  | 1.349919  | -1.001402 | -0.040606 |
| O  | 0.711160  | 2.314267  | -1.270822 |
| O  | 1.682012  | 1.510434  | 1.217610  |
| O  | -0.729791 | 2.643712  | 0.332193  |
| C  | -2.954535 | -0.261227 | -0.913122 |
| H  | -1.918244 | 1.565271  | -1.436247 |
| C  | -2.690687 | -1.667843 | 2.593787  |
| H  | -2.388991 | 0.443829  | 2.289556  |
| C  | -1.037613 | -3.161670 | 1.669517  |
| C  | 0.896880  | -2.117772 | 0.467104  |
| O  | 0.988317  | 0.340437  | 2.969262  |
| C  | -0.790088 | -1.573776 | -2.237061 |
| H  | -0.035814 | 0.430332  | -2.572406 |
| C  | 2.686659  | -0.935976 | -0.509045 |
| C  | -0.010426 | 3.116420  | -0.601830 |
| C  | 1.801370  | 1.131235  | 2.427562  |
| C  | -4.189689 | 0.404226  | -0.344332 |
| C  | -2.932346 | -1.632168 | -1.085406 |
| C  | -2.210752 | -2.969351 | 2.383112  |
| H  | -3.604547 | -1.518128 | 3.176583  |
| H  | -0.637847 | -4.167618 | 1.507503  |
| H  | 1.478799  | -3.047367 | 0.395882  |
| C  | 0.299229  | -2.238482 | -3.018309 |
| C  | -1.869000 | -2.279671 | -1.741460 |
| C  | 2.987839  | -0.179797 | -1.646670 |
| C  | 3.717503  | -1.580543 | 0.185823  |
| C  | 0.003626  | 4.580744  | -0.887096 |
| C  | 2.982455  | 1.637675  | 3.191789  |

|   |           |           |           |
|---|-----------|-----------|-----------|
| C | -5.335689 | 0.329530  | -1.353810 |
| C | -3.983619 | 1.845555  | 0.093885  |
| H | -4.483691 | -0.189179 | 0.545010  |
| H | -3.781703 | -2.228522 | -0.732569 |
| H | -2.752046 | -3.824662 | 2.794440  |
| H | 0.566101  | -1.649272 | -3.911567 |
| H | 1.225330  | -2.341144 | -2.425816 |
| H | 0.002366  | -3.245499 | -3.347062 |
| H | -1.916442 | -3.363473 | -1.893918 |
| C | 4.298424  | -0.108856 | -2.106049 |
| H | 2.185037  | 0.347397  | -2.166186 |
| C | 5.027509  | -1.499925 | -0.278292 |
| H | 3.493191  | -2.119471 | 1.110669  |
| H | 0.205288  | 4.765822  | -1.950192 |
| H | -0.944673 | 5.045172  | -0.587502 |
| H | 0.812959  | 5.046160  | -0.302916 |
| H | 3.852639  | 1.013343  | 2.933693  |
| H | 3.216866  | 2.670381  | 2.903345  |
| H | 2.809803  | 1.565135  | 4.272188  |
| H | -5.562823 | -0.707846 | -1.645619 |
| H | -6.253656 | 0.776700  | -0.937661 |
| H | -5.073792 | 0.887291  | -2.270578 |
| H | -3.127889 | 1.962895  | 0.775941  |
| H | -3.802682 | 2.505542  | -0.773284 |
| H | -4.888446 | 2.219504  | 0.598905  |
| C | 5.322278  | -0.770321 | -1.427962 |
| H | 4.522407  | 0.473958  | -3.002832 |
| H | 5.825885  | -2.001108 | 0.274550  |
| H | 6.351708  | -0.704681 | -1.788120 |

\*

-----

|   |           |           |           |
|---|-----------|-----------|-----------|
| H | 2.567545  | 2.004072  | 4.449012  |
| H | 4.489525  | 0.490391  | -3.038546 |
| H | 5.833168  | -2.328740 | -0.067252 |
| H | 6.307264  | -0.911117 | -2.062635 |
| C | -1.875004 | 0.479350  | -1.455065 |
| C | -0.798085 | -0.143242 | -2.104059 |
| C | -2.967526 | -0.274958 | -0.980586 |
| C | -0.773519 | -1.538502 | -2.298568 |
| C | -4.201538 | 0.364806  | -0.362440 |
| C | -2.910850 | -1.655396 | -1.141049 |
| C | 0.359801  | -2.202515 | -3.035991 |
| C | -1.836152 | -2.276388 | -1.788832 |
| C | -5.404305 | 0.226182  | -1.307108 |
| C | -4.009826 | 1.825425  | 0.042947  |
| H | -1.925303 | 1.567314  | -1.431274 |
| H | -0.033095 | 0.478823  | -2.573179 |
| H | -4.425216 | -0.213952 | 0.551294  |
| H | -3.731449 | -2.273786 | -0.765705 |
| H | 0.917007  | -1.478704 | -3.647297 |
| H | 1.076226  | -2.660719 | -2.334837 |
| H | -0.010240 | -3.001959 | -3.694406 |
| H | -1.843601 | -3.363546 | -1.909982 |
| H | -5.600775 | -0.825547 | -1.564342 |
| H | -6.313428 | 0.637440  | -0.840646 |
| H | -5.224335 | 0.776322  | -2.245762 |
| H | -3.123018 | 1.966175  | 0.677195  |
| H | -3.891505 | 2.475285  | -0.840091 |
| H | -4.892797 | 2.180901  | 0.595438  |
| H | 0.197000  | 0.179578  | 2.091835  |
| O | 0.811636  | 2.318189  | -1.175812 |
| O | -0.667039 | 2.662315  | 0.389255  |
| C | 0.032696  | 3.118022  | -0.569212 |
| C | -0.043306 | 4.564800  | -0.953329 |
| H | 0.170470  | 4.688493  | -2.021948 |
| H | -1.029626 | 4.975887  | -0.706120 |
| H | 0.718035  | 5.116433  | -0.380950 |

\*

-----

### TS(F<sup>S</sup>-G<sup>S</sup>)1

CPCM (MeOH)

|                      |              |
|----------------------|--------------|
| M06 SCF (DZ) =       | -1223.418182 |
| G (1 atm) =          | -1223.117705 |
| qh-G (1 mol/L) =     | -1223.109067 |
| qh-G (24.56 mol/L) = | -1223.106045 |
| Lowest Frequency =   | -96.9592     |

|                           |              |
|---------------------------|--------------|
| HF SCF energy (TZ) =      | -1216.944599 |
| HF SCF energy (QZ) =      | -1217.020748 |
| Correlation energy (DZ) = | -4.158022    |
| Correlation energy (TZ) = | -5.160734    |
| DLPNO-CCSD(T1)/CBS =      | -1222.790347 |

|                     |              |
|---------------------|--------------|
| PBE0+D3BJ (ATZ) =   | -1223.295957 |
| M06-2X (ATZ) =      | -1224.001390 |
| wB97M-V (ATZ) =     | -1224.075544 |
| B2GP-PLYP (ATZ) =   | -1223.382940 |
| B2K-PLYP (ATZ) =    | -1223.225856 |
| PWPB95 (ATZ) =      | -1223.688115 |
| PWPB95+D3BJ (ATZ) = | -1223.716849 |
| PWPB95+D4 (ATZ) =   | -1223.731590 |

\*xyz 0 1

|    |          |           |           |
|----|----------|-----------|-----------|
| Ru | 0.131336 | 0.687770  | 0.386100  |
| C  | 2.553683 | -0.602319 | -0.591936 |
| O  | 0.648272 | 2.431594  | 1.598479  |

### TS(F<sup>S</sup>-G<sup>S</sup>)1

CPCM (MeOH)

|                        |              |
|------------------------|--------------|
| wB97X-D3 SCF (DZ) =    | -1223.933120 |
| G (1 atm) =            | -1223.620696 |
| qh G-E (1 mol/L) =     | 0.323998     |
| qh G-E (24.56 mol/L) = | 0.327020     |
| Lowest Frequency =     | -82.11       |

|                           |              |
|---------------------------|--------------|
| HF SCF energy (TZ) =      | -1216.950758 |
| HF SCF energy (QZ) =      | -1217.025753 |
| Correlation energy (DZ) = | -4.153804    |
| Correlation energy (TZ) = | -5.155707    |
| DLPNO-CCSD(T1)/CBS =      | -1222.789506 |

|                     |              |
|---------------------|--------------|
| PBE0+D3BJ (ATZ) =   | -1223.297479 |
| M06-2X (ATZ) =      | -1224.005619 |
| wB97M-V (ATZ) =     | -1224.076789 |
| B2GP-PLYP (ATZ) =   | -1223.385447 |
| B2K-PLYP (ATZ) =    | -1223.229121 |
| PWPB95 (ATZ) =      | -1223.689368 |
| PWPB95+D3BJ (ATZ) = | -1223.719687 |
| PWPB95+D4 (ATZ) =   | -1223.732506 |

\*xyz 0 1

|    |          |           |           |
|----|----------|-----------|-----------|
| Ru | 0.129112 | 0.701671  | 0.429491  |
| C  | 2.564247 | -0.556938 | -0.589024 |
| C  | 3.918355 | -0.501888 | -0.269229 |

|   |           |           |           |
|---|-----------|-----------|-----------|
| C | 3.913494  | -0.536462 | -0.307586 |
| C | 1.917650  | -1.850139 | -0.707793 |
| H | 2.028459  | 0.331407  | -0.853660 |
| O | 1.655282  | 2.281304  | -1.484220 |
| N | -0.346343 | -0.996990 | -0.635009 |
| O | -0.514370 | 2.036781  | -1.057226 |
| O | -1.517058 | 0.450287  | 1.618589  |
| O | 0.335108  | -0.533706 | 2.173342  |
| C | -0.362307 | 3.417355  | 1.829456  |
| H | 1.014887  | 2.147522  | 2.449510  |
| C | 4.652327  | -1.708309 | -0.140842 |
| H | 4.402934  | 0.437954  | -0.233407 |
| C | 2.677086  | -0.302229 | -0.579989 |
| C | 0.489026  | -1.950044 | -0.928705 |
| C | 0.472400  | 2.610450  | -1.657757 |
| C | -1.734129 | -1.269662 | -0.857638 |
| C | -0.884486 | -0.309732 | 2.430111  |
| H | 0.065608  | 4.276997  | 2.365813  |
| H | -1.206042 | 2.995636  | 2.397331  |
| H | -0.717018 | 3.737195  | 0.841518  |
| C | 4.034551  | -2.950853 | -0.287948 |
| H | 5.719825  | -1.653062 | 0.086781  |
| H | 2.186204  | -3.993915 | -0.689299 |
| H | 0.098116  | -2.887759 | -1.349976 |
| C | 0.098854  | 3.747022  | -2.571277 |
| C | -2.503744 | -0.354286 | -1.577828 |
| C | -2.320016 | -2.422453 | -0.329883 |
| C | -1.581370 | -0.914810 | 3.596153  |
| H | 4.615950  | -3.868780 | -0.173915 |
| H | -0.811361 | 3.513494  | -3.141374 |
| H | -0.118869 | 4.638576  | -1.960771 |
| H | 0.925089  | 3.986305  | -3.253111 |
| C | -3.852311 | -0.616298 | -1.796041 |
| H | -2.028341 | 0.557889  | -1.945868 |
| C | -3.674750 | -2.669013 | -0.543624 |
| H | -1.716335 | -3.112740 | 0.266977  |
| H | -2.144716 | -1.797627 | 3.254496  |
| H | -2.302540 | -0.205089 | 4.022848  |
| H | -0.857764 | -1.234483 | 4.356137  |
| C | -4.442321 | -1.771795 | -1.282127 |
| H | -4.452022 | 0.094001  | -2.370964 |
| H | -4.131834 | -3.568077 | -0.122743 |
| H | -5.504298 | -1.967026 | -1.449826 |

\*

|   |           |           |           |
|---|-----------|-----------|-----------|
| C | 1.925318  | -1.798385 | -0.731019 |
| N | -0.351298 | -0.975462 | -0.654581 |
| C | 4.644941  | -1.681010 | -0.093240 |
| C | 2.668255  | -2.977729 | -0.587832 |
| C | 0.486735  | -1.899583 | -0.983414 |
| C | -1.740453 | -1.253849 | -0.896049 |
| C | 4.020732  | -2.918234 | -0.260525 |
| C | -2.484157 | -0.392776 | -1.704099 |
| C | -2.342767 | -2.358164 | -0.290812 |
| C | -3.834165 | -0.657247 | -1.922430 |
| C | -3.697689 | -2.608541 | -0.507492 |
| C | -4.445122 | -1.762212 | -1.325234 |
| H | 2.050343  | 0.385874  | -0.837318 |
| H | 4.410302  | 0.467955  | -0.170657 |
| H | 5.706515  | -1.635158 | 0.159401  |
| H | 2.175206  | -3.944758 | -0.714929 |
| H | 0.111462  | -2.823899 | -1.441562 |
| H | 4.590533  | -3.841290 | -0.136962 |
| H | -1.997837 | 0.481050  | -2.139051 |
| H | -1.752908 | -3.006064 | 0.361757  |
| H | -4.416933 | 0.009723  | -2.561545 |
| H | -4.169538 | -3.469107 | -0.028443 |
| H | -5.505835 | -1.959287 | -1.494185 |
| O | 0.724050  | 2.397706  | 1.671115  |
| C | -0.231762 | 3.436989  | 1.930373  |
| H | 1.070567  | 2.077322  | 2.516351  |
| H | 0.256363  | 4.262352  | 2.467316  |
| H | -1.081266 | 3.049879  | 2.511573  |
| H | -0.584882 | 3.785037  | 0.953204  |
| O | 1.594131  | 2.281006  | -1.520769 |
| O | -0.556235 | 2.046977  | -1.007951 |
| C | 0.399552  | 2.591620  | -1.675288 |
| C | -0.004009 | 3.673988  | -2.649827 |
| H | -0.991108 | 3.467255  | -3.083027 |
| H | -0.066270 | 4.628834  | -2.104727 |
| H | 0.748271  | 3.778190  | -3.441450 |
| O | -1.524814 | 0.428959  | 1.660246  |
| O | 0.334655  | -0.544058 | 2.220748  |
| C | -0.891380 | -0.336269 | 2.465844  |
| C | -1.597784 | -0.981614 | 3.614252  |
| H | -2.149278 | -1.853826 | 3.231216  |
| H | -2.323271 | -0.285112 | 4.052805  |
| H | -0.877091 | -1.318046 | 4.368276  |

\*

-----  
**TS(F<sup>5</sup>-G<sup>5</sup>)2**

CPCM (MeOH)

|                      |              |
|----------------------|--------------|
| M06 SCF (DZ) =       | -1223.422203 |
| G (1 atm) =          | -1223.125935 |
| qh-G (1 mol/L) =     | -1223.117742 |
| qh-G (24.56 mol/L) = | -1223.114720 |
| Lowest Frequency =   | -1122.89     |

|                           |              |
|---------------------------|--------------|
| HF SCF energy (TZ) =      | -1216.889216 |
| HF SCF energy (QZ) =      | -1216.964864 |
| Correlation energy (DZ) = | -4.218356    |
| Correlation energy (TZ) = | -5.221884    |
| DLPNO-CCSD(T1)/CBS =      | -1222.795939 |

|                   |              |
|-------------------|--------------|
| PBE0+D3BJ (ATZ) = | -1223.304086 |
| M06-2X (ATZ) =    | -1223.992008 |
| wB97M-V (ATZ) =   | -1224.070939 |
| B2GP-PLYP (ATZ) = | -1223.389409 |
| B2K-PLYP (ATZ) =  | -1223.232139 |
| PWPB95 (ATZ) =    | -1223.691911 |

-----  
**TS(F<sup>5</sup>-G<sup>5</sup>)2**

CPCM (MeOH)

|                        |              |
|------------------------|--------------|
| wB97X-D3 SCF (DZ) =    | -1223.930745 |
| G (1 atm) =            | -1223.623374 |
| qh G-E (1 mol/L) =     | 0.318628     |
| qh G-E (24.56 mol/L) = | 0.321651     |
| Lowest Frequency =     | -1202.57     |

|                           |              |
|---------------------------|--------------|
| HF SCF energy (TZ) =      | -1216.895958 |
| HF SCF energy (QZ) =      | -1216.970248 |
| Correlation energy (DZ) = | -4.212846    |
| Correlation energy (TZ) = | -5.216409    |
| DLPNO-CCSD(T1)/CBS =      | -1222.795460 |

|                   |              |
|-------------------|--------------|
| PBE0+D3BJ (ATZ) = | -1223.303512 |
| M06-2X (ATZ) =    | -1223.995465 |
| wB97M-V (ATZ) =   | -1224.072149 |
| B2GP-PLYP (ATZ) = | -1223.391195 |
| B2K-PLYP (ATZ) =  | -1223.234825 |
| PWPB95 (ATZ) =    | -1223.692448 |



PWPB95+D3BJ (ATZ) = -1223.721519  
PWPB95+D4 (ATZ) = -1223.735538

PWPB95+D3BJ (ATZ) = -1223.721932  
PWPB95+D4 (ATZ) = -1223.735907

\*xyz 0 1

|    |           |           |           |
|----|-----------|-----------|-----------|
| Ru | 0.339669  | -0.589354 | -0.038913 |
| C  | 1.711159  | 0.919218  | 0.117810  |
| H  | 1.186857  | 0.297792  | 1.317420  |
| C  | 1.152059  | 2.205049  | -0.147161 |
| C  | 3.115882  | 0.840063  | 0.192832  |
| N  | -0.878006 | 1.055961  | -0.238981 |
| O  | -1.146093 | -2.057582 | -0.844287 |
| O  | 1.271001  | -0.930004 | -1.935443 |
| O  | 1.809260  | -2.177410 | -0.232322 |
| O  | -0.541067 | -0.963106 | 1.821165  |
| O  | 1.024368  | 0.332737  | 2.701676  |
| C  | 1.956811  | 3.340174  | -0.322597 |
| C  | -0.273064 | 2.214496  | -0.281426 |
| C  | 3.908949  | 1.966838  | 0.001215  |
| H  | 3.588616  | -0.123036 | 0.414764  |
| C  | -2.280735 | 1.004588  | -0.462622 |
| C  | -1.372324 | -3.274674 | -0.131786 |
| H  | -0.861634 | -2.270078 | -1.746722 |
| C  | 1.980231  | -1.875097 | -1.450334 |
| C  | 0.010910  | -0.403620 | 2.823694  |
| C  | 3.336810  | 3.222172  | -0.250103 |
| H  | 1.488237  | 4.307344  | -0.531436 |
| H  | -0.843916 | 3.142391  | -0.422721 |
| H  | 4.997796  | 1.874038  | 0.056799  |
| C  | -3.089480 | 0.248068  | 0.391404  |
| C  | -2.853428 | 1.686659  | -1.541248 |
| H  | -2.119740 | -3.888864 | -0.655713 |
| H  | -1.757081 | -2.995239 | 0.856793  |
| H  | -0.436621 | -3.843778 | -0.009149 |
| C  | 3.001246  | -2.561613 | -2.289471 |
| C  | -0.600118 | -0.619994 | 4.170316  |
| H  | 3.974644  | 4.098083  | -0.389620 |
| C  | -4.463142 | 0.203181  | 0.179995  |
| H  | -2.620113 | -0.288127 | 1.219407  |
| C  | -4.229611 | 1.630131  | -1.748589 |
| H  | -2.212313 | 2.243398  | -2.230341 |
| H  | 2.675475  | -2.607647 | -3.336843 |
| H  | 3.932561  | -1.973623 | -2.252035 |
| H  | 3.212911  | -3.566905 | -1.904087 |
| H  | -1.359385 | 0.160287  | 4.337693  |
| H  | -1.101122 | -1.594826 | 4.221582  |
| H  | 0.157553  | -0.530395 | 4.958649  |
| C  | -5.039093 | 0.892874  | -0.887692 |
| H  | -5.092816 | -0.378770 | 0.857978  |
| H  | -4.668992 | 2.161350  | -2.596684 |
| H  | -6.118439 | 0.848285  | -1.052426 |

\*

\*xyz 0 1

|    |           |           |           |
|----|-----------|-----------|-----------|
| Ru | 0.333664  | -0.590218 | -0.035686 |
| C  | 1.709896  | 0.932128  | 0.165809  |
| C  | 1.152875  | 2.200686  | -0.156433 |
| C  | 3.114652  | 0.866791  | 0.257287  |
| N  | -0.888192 | 1.061208  | -0.278037 |
| C  | 1.949131  | 3.335101  | -0.371204 |
| C  | -0.283822 | 2.209504  | -0.318907 |
| C  | 3.907489  | 1.988285  | 0.025751  |
| C  | -2.301650 | 1.028271  | -0.482995 |
| C  | 3.331207  | 3.229294  | -0.281182 |
| C  | -3.109433 | 0.339060  | 0.426352  |
| C  | -2.875351 | 1.663914  | -1.587651 |
| C  | -4.489265 | 0.315896  | 0.243299  |
| C  | -4.258682 | 1.630970  | -1.765975 |
| C  | -5.069659 | 0.962232  | -0.850451 |
| H  | 3.590895  | -0.083908 | 0.513626  |
| H  | 1.479213  | 4.289853  | -0.622994 |
| H  | -0.845769 | 3.138295  | -0.474917 |
| H  | 4.995445  | 1.902283  | 0.092566  |
| H  | 3.964049  | 4.102424  | -0.452269 |
| H  | -2.640081 | -0.167277 | 1.270779  |
| H  | -2.236765 | 2.171605  | -2.314069 |
| H  | -5.117600 | -0.214159 | 0.962570  |
| H  | -4.701815 | 2.127518  | -2.631992 |
| H  | -6.152316 | 0.938279  | -0.991545 |
| H  | 1.171086  | 0.284199  | 1.397292  |
| O  | -1.149403 | -2.029829 | -0.836051 |
| C  | -1.300887 | -3.321164 | -0.231657 |
| H  | -0.976588 | -2.149022 | -1.781349 |
| H  | -2.124308 | -3.863103 | -0.717950 |
| H  | -1.545025 | -3.145142 | 0.821945  |
| H  | -0.368417 | -3.900319 | -0.303442 |
| O  | 1.319497  | -0.923878 | -1.908629 |
| O  | 1.813956  | -2.160590 | -0.185634 |
| C  | 2.005941  | -1.874376 | -1.406432 |
| C  | 3.024966  | -2.596692 | -2.231453 |
| H  | 2.685024  | -2.674445 | -3.271633 |
| H  | 3.957102  | -2.011226 | -2.218146 |
| H  | 3.226841  | -3.590213 | -1.814107 |
| O  | -0.574146 | -0.977233 | 1.816701  |
| O  | 1.035270  | 0.248996  | 2.699491  |
| C  | -0.003524 | -0.465711 | 2.826208  |
| C  | -0.596791 | -0.685819 | 4.184318  |
| H  | -1.375131 | 0.076108  | 4.344010  |
| H  | -1.068925 | -1.674023 | 4.238447  |
| H  | 0.165916  | -0.573453 | 4.963101  |

\*

-----  
**TS(F<sup>25</sup>-G<sup>25</sup>)1**

CPCM (MeOH)

M06 SCF (DZ) = -1339.100810

G (1 atm) = -1338.748924

qh-G (1 mol/L) = -1338.739830

qh-G (24.56 mol/L) = -1338.736807

Lowest Frequency = -78.25

HF SCF energy (TZ) = -1332.042359

HF SCF energy (QZ) = -1332.126821

Correlation energy (DZ) = -4.543825

Correlation energy (TZ) = -5.639746

DLPNO-CCSD(T1)/CBS = -1338.432403

```

*xyz 0 1
Ru -0.030986 0.542899 0.027017
C -2.380443 -1.129642 0.752436
O 1.643815 1.054042 -1.147788
C -1.884685 -2.230201 0.034195
C -3.751593 -0.951872 0.901562
H -1.702187 -0.459038 1.308812
O -1.008825 0.479154 -1.957940
O -0.982057 0.838046 2.751761
N 0.394301 -1.436591 -0.082602
O 1.020355 0.814608 1.774920
O -0.489340 2.635635 0.053252
C 2.836666 1.505593 -0.507426
H 1.255021 1.816577 -1.661889
C -2.785227 -3.160196 -0.504787
C -0.458458 -2.412553 -0.163864
C -4.641498 -1.863406 0.333062
H -4.126483 -0.100058 1.474826
C -2.426100 0.567353 -2.087847
H -0.644817 1.335243 -2.291895
C 0.252002 0.946247 2.801525
C 1.774365 -1.783877 -0.242985
C -0.360332 3.360543 -0.979988
H 2.634282 2.378473 0.134143
H 3.221233 0.683580 0.109843
H 3.577094 1.765739 -1.279151
C -4.155658 -2.970159 -0.365417
H -2.399256 -4.026618 -1.049999
H -0.090904 -3.423138 -0.396943
H -5.718832 -1.719869 0.446783
H -2.691509 0.818681 -3.126477
H -2.843703 1.329136 -1.405544
H -2.855050 -0.411492 -1.836532
C 0.962590 1.262544 4.091140
C 2.602615 -1.827494 0.878276
C 2.284603 -2.041380 -1.514269
C -0.775389 4.799664 -0.876838
O 0.087122 2.946948 -2.091805
H -4.851667 -3.691573 -0.799924
H 1.870276 0.650705 4.196578
H 1.280911 2.317003 4.080113
H 0.297445 1.105663 4.949979
C 3.949515 -2.144190 0.721538
H 2.180323 -1.597928 1.859371
C 3.636092 -2.344149 -1.663161
H 1.616712 -1.982658 -2.378828
H -1.605274 4.981744 -1.576842
H 0.056653 5.443762 -1.197422
H -1.087716 5.065989 0.140117
C 4.470056 -2.397992 -0.547412
H 4.598935 -2.189058 1.599465
H 4.039149 -2.540516 -2.659877
H 5.529340 -2.638240 -0.666871

```

\*

-----

**TS(F<sup>25</sup>-G<sup>25</sup>)2**

CPCM (MeOH)

M06 SCF (DZ) = -1339.106590

G (1 atm) = -1338.760354

qh-G (1 mol/L) = -1338.750771

qh-G (24.56 mol/L) = -1338.747748

Lowest Frequency = -1188.18

HF SCF energy (TZ) = -1331.993210

HF SCF energy (QZ) = -1332.077134  
 Correlation energy (DZ) = -4.599512  
 Correlation energy (TZ) = -5.696445  
 DLPNO-CCSD(T1)/CBS = -1338.439843

```
*xyz 0 1
Ru  0.279383 -0.336510 -0.021300
C   1.417664  1.350490  0.322898
N  -1.166117  1.116261 -0.038385
C   2.815888  1.481517  0.409945
C   0.665663  2.549305  0.143933
H   1.072551  0.525719  1.411720
O  -0.920056 -1.988461 -0.975257
O   0.723018  0.004229 -2.146974
O   1.897272 -1.743294  0.020685
O  -0.340654 -1.113407  1.794701
C  -2.547429  0.851617 -0.230491
C  -0.748515  2.352244 -0.002290
C   3.430143  2.723951  0.288044
H   3.423854  0.585130  0.573803
C   1.287998  3.800319  0.034445
O   1.069925  0.276861  2.785060
C  -1.474263 -3.035448 -0.187606
H  -0.198234 -2.379205 -1.523120
C   1.723036  0.866660 -2.678955
H   1.004697 -0.927861 -2.350747
C   2.153302 -2.506105 -0.961307
C   0.211751 -0.641491  2.840583
C  -3.243577  1.422964 -1.298847
C  -3.202403 -0.011746  0.652500
H  -1.455868  3.189991 -0.075825
C   2.672016  3.887856  0.101584
H   4.520322  2.795372  0.345938
H   0.678259  4.695996 -0.121250
H  -1.960926 -3.779109 -0.838219
H  -2.226215 -2.596603  0.480728
H  -0.700800 -3.529467  0.424535
H   1.717176  0.798609 -3.777893
H   2.725114  0.602859 -2.298626
H   1.489988  1.898008 -2.381670
C   3.317075 -3.446155 -0.823396
O   1.498134 -2.526901 -2.044474
C  -0.206826 -1.188484  4.167031
C  -4.596740  1.139722 -1.472766
H  -2.713556  2.072851 -2.000880
C  -4.555081 -0.281810  0.475492
H  -2.631439 -0.451144  1.474898
H   3.168011  4.857183  0.012211
H   4.060775 -3.212391 -1.600437
H   2.975988 -4.475107 -1.011082
H   3.785629 -3.381592  0.166040
H   0.669789 -1.309342  4.817326
H  -0.739140 -2.140846  4.057948
H  -0.876663 -0.461445  4.651849
C  -5.256120  0.290719 -0.586881
H  -5.136584  1.583299 -2.313133
H  -5.068293 -0.947005  1.174698
H  -6.317092  0.069737 -0.726344
```

\*

-----  
**TS(E<sup>+</sup>-H)3**

CPCM (MeOH)

M06 SCF (DZ) = -1728.799344

G (1 atm) = -1728.392004

qh-G (1 mol/L) = -1728.384073

qh-G (24.56 mol/L) = -1728.381051  
Lowest Frequency = -108.8494

HF SCF energy (TZ) = -1720.956043  
HF SCF energy (QZ) = -1721.034278  
Correlation energy (DZ) = -4.873564  
Correlation energy (TZ) = -5.982501  
DLPNO-CCSD(T1)/CBS = -1727.688344

\*xyz 0 1

|    |           |           |           |
|----|-----------|-----------|-----------|
| Ru | 0.431775  | 0.071043  | -0.627528 |
| C  | 0.081482  | 2.117715  | -1.134372 |
| C  | 1.402906  | 1.759857  | -1.542329 |
| C  | -0.246046 | 3.288737  | -0.240238 |
| C  | -0.994734 | 1.324545  | -1.653953 |
| C  | 1.619935  | 0.288591  | 1.062411  |
| N  | -0.980111 | -0.137536 | 1.005724  |
| O  | -0.520315 | -2.580885 | -0.675121 |
| Cl | 2.796895  | -2.163841 | -0.854065 |
| C  | 1.625840  | 0.643829  | -2.380933 |
| H  | 2.263163  | 2.290392  | -1.126249 |
| C  | -0.695190 | 4.453024  | -1.122896 |
| C  | 0.879675  | 3.720255  | 0.684664  |
| H  | -1.107766 | 2.971568  | 0.380288  |
| C  | -0.787631 | 0.257424  | -2.555578 |
| H  | -2.010516 | 1.532794  | -1.298521 |
| C  | 0.948920  | 0.161455  | 2.302460  |
| C  | 2.993786  | 0.553685  | 1.118136  |
| C  | -2.396248 | -0.101721 | 0.873611  |
| C  | -0.464823 | -0.053361 | 2.196717  |
| C  | -0.375336 | -3.254079 | 0.338592  |
| H  | 1.488576  | -2.940018 | 0.391388  |
| C  | 0.531454  | -0.127349 | -2.881076 |
| H  | 2.645900  | 0.313981  | -2.586407 |
| H  | -1.546034 | 4.177698  | -1.766244 |
| H  | -0.997633 | 5.312681  | -0.504722 |
| H  | 0.132652  | 4.779102  | -1.776462 |
| H  | 1.748317  | 4.095099  | 0.115894  |
| H  | 1.221366  | 2.901433  | 1.337750  |
| H  | 0.536030  | 4.547657  | 1.324777  |
| H  | -1.631130 | -0.353334 | -2.884905 |
| C  | 1.605377  | 0.294496  | 3.536853  |
| C  | 3.648881  | 0.703972  | 2.340040  |
| H  | 3.572848  | 0.641460  | 0.193644  |
| C  | -3.050919 | -0.937843 | -0.037763 |
| C  | -3.139284 | 0.826225  | 1.615503  |
| H  | -1.104899 | -0.119155 | 3.089690  |
| C  | -1.504012 | -3.955664 | 1.024833  |
| O  | 0.782589  | -3.400388 | 0.950294  |
| C  | 0.797776  | -1.342433 | -3.703938 |
| C  | 2.962873  | 0.574276  | 3.554088  |
| H  | 1.040585  | 0.185971  | 4.468288  |
| H  | 4.719804  | 0.929275  | 2.349988  |
| C  | -4.432890 | -0.861190 | -0.177248 |
| H  | -2.458758 | -1.652229 | -0.614567 |
| C  | -4.522057 | 0.896568  | 1.465843  |
| H  | -2.625182 | 1.516368  | 2.290919  |
| H  | -1.154733 | -4.839193 | 1.573979  |
| H  | -1.952727 | -3.257868 | 1.752007  |
| H  | -2.280000 | -4.228348 | 0.298338  |
| H  | 1.619314  | -1.926224 | -3.261267 |
| H  | 1.096891  | -1.038392 | -4.720835 |
| H  | -0.095613 | -1.977611 | -3.782168 |
| H  | 3.493103  | 0.694283  | 4.501712  |
| C  | -5.174998 | 0.052186  | 0.571583  |
| H  | -4.936959 | -1.525857 | -0.883512 |

|   |           |          |          |
|---|-----------|----------|----------|
| H | -5.088560 | 1.629388 | 2.045752 |
| H | -6.259172 | 0.112194 | 0.450249 |

\*

-----

**TS(E<sup>+</sup>-H)<sub>4</sub>**

CPCM (MeOH)  
M06 SCF (DZ) = -1268.416760  
G (1 atm) = -1268.011559  
qh-G (1 mol/L) = -1728.384073  
qh-G (24.56 mol/L) = -1728.381051  
Lowest Frequency = -57.63

HF SCF energy (TZ) = -1261.294216  
HF SCF energy (QZ) = -1261.369040  
Correlation energy (DZ) = -4.690241  
Correlation energy (TZ) = -5.725121  
DLPNO-CCSD(T1)/CBS = -1267.721424

\*xyz 0 1

|    |           |           |           |
|----|-----------|-----------|-----------|
| Ru | -0.113436 | -0.443906 | 0.670661  |
| C  | 1.465395  | -1.005528 | -0.555687 |
| N  | -0.331638 | 0.856952  | -0.988401 |
| C  | 2.483743  | -1.928079 | -0.296537 |
| C  | 1.551360  | -0.283065 | -1.776276 |
| O  | 1.882273  | 2.295968  | 1.182982  |
| C  | 0.532054  | 0.722160  | -1.946253 |
| C  | -1.371962 | 1.819736  | -1.095116 |
| C  | 3.521919  | -2.133330 | -1.216766 |
| H  | 2.492773  | -2.500859 | 0.637017  |
| C  | 2.580989  | -0.485930 | -2.698385 |
| C  | 3.061228  | 2.255397  | 0.890537  |
| H  | 0.496234  | 1.375231  | -2.830309 |
| C  | -2.204267 | 1.843261  | -2.216639 |
| C  | -1.567235 | 2.727107  | -0.050237 |
| C  | 3.571001  | -1.423819 | -2.415123 |
| H  | 4.302054  | -2.865223 | -0.990188 |
| H  | 2.609904  | 0.096455  | -3.623891 |
| C  | 4.018111  | 3.393297  | 1.022280  |
| O  | 3.657024  | 1.162182  | 0.406646  |
| C  | -3.226971 | 2.786371  | -2.294094 |
| H  | -2.058484 | 1.109467  | -3.014779 |
| C  | -2.587215 | 3.667722  | -0.140601 |
| H  | -0.895722 | 2.699552  | 0.813230  |
| H  | 4.383589  | -1.597364 | -3.123580 |
| H  | 4.460567  | 3.618643  | 0.040874  |
| H  | 4.844412  | 3.103073  | 1.687772  |
| H  | 3.507958  | 4.277513  | 1.418616  |
| H  | 2.984776  | 0.453716  | 0.328047  |
| C  | -3.420284 | 3.698619  | -1.259837 |
| H  | -3.881293 | 2.800061  | -3.168919 |
| H  | -2.731361 | 4.386046  | 0.669869  |
| H  | -4.225087 | 4.434700  | -1.322527 |
| C  | -0.362383 | -2.442022 | 1.499307  |
| C  | -0.203318 | -1.551915 | 2.574126  |
| C  | -1.324554 | -2.184153 | 0.471690  |
| H  | 0.332453  | -3.278282 | 1.379140  |
| C  | -1.060494 | -0.409883 | 2.723653  |
| H  | 0.622812  | -1.691939 | 3.275960  |
| C  | -1.445556 | -3.123632 | -0.700859 |
| C  | -2.174504 | -1.043997 | 0.644269  |
| C  | -0.791951 | 0.573123  | 3.812974  |
| C  | -2.088008 | -0.206334 | 1.785393  |
| C  | -2.367068 | -4.273679 | -0.297177 |
| C  | -1.931359 | -2.457727 | -1.977622 |
| H  | -0.432811 | -3.531099 | -0.880578 |

|   |           |           |           |
|---|-----------|-----------|-----------|
| H | -2.876055 | -0.776228 | -0.151162 |
| H | -1.292583 | 1.532835  | 3.623802  |
| H | -1.156442 | 0.176852  | 4.774862  |
| H | 0.289376  | 0.748991  | 3.922191  |
| H | -2.719051 | 0.682762  | 1.853473  |
| H | -2.001466 | -4.795184 | 0.601603  |
| H | -3.382278 | -3.896511 | -0.083708 |
| H | -2.442988 | -5.008884 | -1.113181 |
| H | -1.306216 | -1.594256 | -2.257496 |
| H | -2.976373 | -2.115175 | -1.887270 |
| H | -1.902449 | -3.179081 | -2.808284 |

\*

-----

**TS(E<sup>+</sup>-H)<sub>5</sub>**

CPCM (MeOH)

M06 SCF (DZ) = -1499.786929

G (1 atm) = -1499.439567

qh-G (1 mol/L) = -1499.431204

qh-G (24.56 mol/L) = -1499.428181

Lowest Frequency = -18.24

HF SCF energy (TZ) = -1493.058681

HF SCF energy (QZ) = -1493.122159

Correlation energy (DZ) = -4.152133

Correlation energy (TZ) = -5.095264

DLPNO-CCSD(T1)/CBS = -1498.787655

\*xyz 0 1

|    |           |           |           |
|----|-----------|-----------|-----------|
| Ru | -0.298544 | -0.505077 | -0.428603 |
| C  | -0.414327 | -1.298517 | 1.529309  |
| N  | 0.500403  | 1.347416  | 0.186132  |
| C  | -1.641461 | -1.581109 | 0.849325  |
| C  | 0.839481  | -1.801139 | 1.063612  |
| H  | -0.430136 | -0.679193 | 2.430593  |
| C  | -1.753803 | 0.836218  | -1.031319 |
| Cl | 4.181815  | -0.385505 | -2.779286 |
| C  | 1.743838  | 1.434044  | 0.868942  |
| C  | -0.238184 | 2.395125  | -0.008578 |
| C  | -2.986418 | -1.188303 | 1.404763  |
| C  | -1.552719 | -2.300011 | -0.382331 |
| C  | 0.925494  | -2.460788 | -0.164237 |
| H  | 1.753477  | -1.550326 | 1.609756  |
| C  | -1.497210 | 2.187435  | -0.677531 |
| C  | -2.929994 | 0.584783  | -1.741683 |
| C  | 1.813834  | 1.980685  | 2.151933  |
| C  | 2.881544  | 0.900219  | 0.260083  |
| H  | 0.106952  | 3.390995  | 0.306356  |
| C  | -2.971788 | 0.074803  | 2.249859  |
| C  | -3.523998 | -2.374897 | 2.204706  |
| H  | -3.652615 | -1.021963 | 0.538010  |
| C  | -0.293622 | -2.648328 | -0.904143 |
| H  | -2.456064 | -2.481602 | -0.970745 |
| C  | 2.232614  | -2.864045 | -0.757577 |
| C  | -2.382999 | 3.225847  | -0.982375 |
| C  | -3.821866 | 1.620287  | -2.048331 |
| H  | -3.178614 | -0.431578 | -2.065383 |
| C  | 3.035334  | 1.995792  | 2.824116  |
| H  | 0.906248  | 2.365541  | 2.626839  |
| C  | 4.094982  | 0.928073  | 0.937249  |
| H  | 2.838503  | 0.473146  | -0.750584 |
| H  | -2.547985 | 0.933479  | 1.703464  |
| H  | -2.397968 | -0.064530 | 3.181886  |
| H  | -4.000055 | 0.335131  | 2.544518  |
| H  | -3.586201 | -3.287907 | 1.591494  |
| H  | -2.868445 | -2.587614 | 3.067107  |

|   |           |           |           |
|---|-----------|-----------|-----------|
| H | -4.530708 | -2.151843 | 2.590961  |
| H | -0.232586 | -3.068302 | -1.912444 |
| H | 2.293695  | -3.962288 | -0.828537 |
| H | 2.360672  | -2.451091 | -1.771712 |
| H | 3.074315  | -2.504285 | -0.148761 |
| C | -3.559934 | 2.935683  | -1.665414 |
| H | -2.145541 | 4.252025  | -0.685914 |
| H | -4.743749 | 1.390042  | -2.590334 |
| C | 4.176118  | 1.469626  | 2.221401  |
| H | 3.089926  | 2.414168  | 3.832120  |
| H | 4.979789  | 0.515991  | 0.443564  |
| H | -4.269787 | 3.730530  | -1.904532 |
| H | 5.129648  | 1.477665  | 2.755067  |

\*

-----

### Cartesian coordinates (Å) and energies (a.u.) for IRC calculations on selected TS structures

Structures generated by IRC calculations at  $\omega$ B97X-D3/cc-pVDZ-PP[Ru](CPCM) level are tabulated in two columns. The left column includes the cartesian coordinates and energies obtained by following the IRC path from the TS structure in the backward direction, while the right column includes the corresponding values by following the IRC path in the forward direction from the same TS structure. DZ is used as abbreviation for the basis sets cc-pVDZ-PP[Ru].

| IRC backward from TS(C <sup>1</sup> -D <sup>+</sup> ) |            |              |           | IRC forward from TS(C <sup>1</sup> -D <sup>+</sup> ) |            |              |           |
|-------------------------------------------------------|------------|--------------|-----------|------------------------------------------------------|------------|--------------|-----------|
| wB97X-D3                                              | SCF (DZ) = | -1729.437542 |           | wB97X-D3                                             | SCF (DZ) = | -1729.437542 |           |
| *xyz                                                  | 0 1        |              |           | *xyz                                                 | 0 1        |              |           |
| Ru                                                    | -0.343397  | 0.651573     | 0.714665  | Ru                                                   | 0.014848   | 0.273348     | 0.929553  |
| C                                                     | 1.545766   | 0.826203     | 1.802318  | C                                                    | 1.699592   | 1.008311     | 2.037271  |
| C                                                     | 1.805661   | 0.960768     | 0.427602  | C                                                    | 2.063189   | 1.016245     | 0.669428  |
| C                                                     | 0.569623   | 1.658304     | 2.439730  | C                                                    | 0.537878   | 1.684441     | 2.509015  |
| C                                                     | 1.103785   | 1.899369     | -0.394339 | C                                                    | 1.258410   | 1.683651     | -0.293826 |
| C                                                     | 0.252606   | 1.500227     | 3.897157  | C                                                    | 0.143879   | 1.647081     | 3.957526  |
| C                                                     | -0.110854  | 2.597398     | 1.641535  | C                                                    | -0.268828  | 2.315658     | 1.528507  |
| C                                                     | 1.401514   | 1.953151     | -1.881047 | C                                                    | 1.720466   | 1.714057     | -1.737506 |
| C                                                     | 0.149312   | 2.713205     | 0.240593  | C                                                    | 0.070566   | 2.317565     | 0.146630  |
| C                                                     | 0.322198   | 2.663597     | -2.693809 | C                                                    | 0.608612   | 1.712790     | -2.782191 |
| C                                                     | 2.777002   | 2.596710     | -2.096957 | C                                                    | 2.620375   | 2.950115     | -1.892526 |
| H                                                     | 2.031502   | 0.035176     | 2.370496  | H                                                    | 2.282074   | 0.398744     | 2.731520  |
| H                                                     | 2.521160   | 0.287017     | -0.041301 | H                                                    | 2.942440   | 0.459950     | 0.343895  |
| H                                                     | 0.392579   | 0.457797     | 4.206318  | H                                                    | 0.497218   | 0.722941     | 4.434215  |
| H                                                     | 0.932238   | 2.137600     | 4.483695  | H                                                    | 0.598033   | 2.499800     | 4.484166  |
| H                                                     | -0.778658  | 1.810194     | 4.112161  | H                                                    | -0.946206  | 1.714418     | 4.070288  |
| H                                                     | -0.919771  | 3.182549     | 2.079729  | H                                                    | -1.235613  | 2.728938     | 1.824752  |
| H                                                     | 1.461922   | 0.906480     | -2.225960 | H                                                    | 2.346359   | 0.820669     | -1.890600 |
| H                                                     | -0.477617  | 3.380909     | -0.348363 | H                                                    | -0.634874  | 2.773640     | -0.556436 |
| H                                                     | -0.677625  | 2.247311     | -2.497593 | H                                                    | 0.004222   | 0.796322     | -2.736680 |
| H                                                     | 0.294612   | 3.742318     | -2.472261 | H                                                    | -0.067919  | 2.574101     | -2.670048 |
| H                                                     | 0.530937   | 2.550841     | -3.767641 | H                                                    | 1.055528   | 1.767426     | -3.785615 |
| H                                                     | 3.569369   | 2.050717     | -1.562689 | H                                                    | 3.444646   | 2.945145     | -1.163576 |
| H                                                     | 2.779279   | 3.639567     | -1.741125 | H                                                    | 2.038160   | 3.874554     | -1.749295 |
| H                                                     | 3.031231   | 2.598931     | -3.167390 | H                                                    | 3.055507   | 2.971471     | -2.902484 |
| C                                                     | 2.096760   | -2.222317    | 0.536668  | C                                                    | 2.327097   | -2.256999    | 0.372367  |
| N                                                     | -0.472785  | -0.965914    | -0.828766 | N                                                    | -0.319186  | -1.082504    | -0.729020 |
| C                                                     | 1.803208   | -1.957991    | -0.804194 | C                                                    | 1.964177   | -1.967496    | -0.948973 |
| C                                                     | 3.422939   | -2.392903    | 0.929662  | C                                                    | 3.671328   | -2.408045    | 0.702888  |
| C                                                     | -1.736329  | -1.110918    | -1.516658 | C                                                    | -1.670329  | -1.205250    | -1.218282 |
| C                                                     | 0.421446   | -1.768552    | -1.285832 | C                                                    | 0.557773   | -1.796844    | -1.345686 |
| C                                                     | 2.833626   | -1.912742    | -1.752784 | C                                                    | 2.949625   | -1.876198    | -1.940793 |
| C                                                     | 4.454433   | -2.294713    | -0.004977 | C                                                    | 4.655298   | -2.259939    | -0.276097 |
| C                                                     | -1.905851  | -0.551912    | -2.780588 | C                                                    | -2.411982  | -0.064537    | -1.529428 |
| C                                                     | -2.760193  | -1.839169    | -0.915096 | C                                                    | -2.241352  | -2.473499    | -1.342541 |
| C                                                     | 4.158663   | -2.056652    | -1.348483 | C                                                    | 4.293931   | -1.998092    | -1.598788 |
| C                                                     | -3.123594  | -0.708346    | -3.442923 | C                                                    | -3.713838  | -0.201389    | -2.000809 |
| C                                                     | -3.969363  | -1.999606    | -1.587039 | C                                                    | -3.551951  | -2.600116    | -1.804475 |
| C                                                     | -4.158145  | -1.428899    | -2.847532 | C                                                    | -4.289124  | -1.466399    | -2.139677 |
| H                                                     | 1.301564   | -2.263406    | 1.282923  | H                                                    | 1.554295   | -2.374093    | 1.133406  |
| H                                                     | 3.650681   | -2.593307    | 1.978942  | H                                                    | 3.951347   | -2.637816    | 1.732801  |
| H                                                     | 0.145485   | -2.393123    | -2.149133 | H                                                    | 0.242070   | -2.321680    | -2.258534 |
| H                                                     | 2.596757   | -1.734576    | -2.804807 | H                                                    | 2.661627   | -1.682366    | -2.977289 |
| H                                                     | 5.492829   | -2.412754    | 0.312497  | H                                                    | 5.709524   | -2.363088    | -0.010088 |
| H                                                     | -1.086586  | 0.004891     | -3.239858 | H                                                    | -1.988422  | 0.933669     | -1.403677 |
| H                                                     | -2.604853  | -2.252400    | 0.082298  | H                                                    | -1.668441  | -3.357889    | -1.054526 |
| H                                                     | 4.961943   | -1.988351    | -2.084734 | H                                                    | 5.061557   | -1.895505    | -2.368190 |
| H                                                     | -3.258897  | -0.264359    | -4.431600 | H                                                    | -4.282842  | 0.696256     | -2.252092 |
| H                                                     | -4.774077  | -2.570434    | -1.118444 | H                                                    | -3.996623  | -3.593382    | -1.893402 |



|    |           |           |           |
|----|-----------|-----------|-----------|
| H  | -5.111148 | -1.549923 | -3.366947 |
| O  | 0.323079  | -1.670212 | 3.154911  |
| O  | -1.315017 | -0.806304 | 1.868821  |
| C  | -0.849224 | -1.611012 | 2.765071  |
| C  | -1.897983 | -2.555866 | 3.325014  |
| H  | -2.807347 | -2.003167 | 3.598253  |
| H  | -2.175533 | -3.283757 | 2.547147  |
| H  | -1.506411 | -3.094057 | 4.196551  |
| Cl | -2.678610 | 1.303043  | 0.222297  |

\*

|    |           |           |           |
|----|-----------|-----------|-----------|
| H  | -5.315177 | -1.565651 | -2.499723 |
| O  | -0.268754 | -1.502707 | 2.122397  |
| O  | -1.961431 | -0.292505 | 1.537718  |
| C  | -1.531613 | -1.339467 | 2.114893  |
| C  | -2.456737 | -2.350321 | 2.704031  |
| H  | -3.436743 | -1.902979 | 2.903683  |
| H  | -2.577983 | -3.164453 | 1.973502  |
| H  | -2.024938 | -2.770644 | 3.620455  |
| Cl | -2.739596 | 3.681531  | -1.519154 |

\*

-----

IRC backward from **TS(C<sup>1</sup>-D<sup>+</sup>)•S**

wB97X-D3 SCF (DZ) = -1845.159673

\*xyz 0 1

|    |           |           |           |
|----|-----------|-----------|-----------|
| Ru | -0.325873 | 0.677553  | 0.724838  |
| C  | 2.175239  | -2.138378 | 0.311557  |
| C  | 0.477807  | 1.819924  | 2.420791  |
| C  | 1.814110  | 1.025516  | 0.502452  |
| H  | 1.931730  | 0.176964  | 2.492653  |
| O  | -0.520588 | -2.707431 | 1.765330  |
| N  | -0.524063 | -0.892683 | -0.773845 |
| Cl | -3.052977 | 1.727825  | 0.698092  |
| O  | -1.287817 | -0.604392 | 2.011789  |
| C  | 1.765381  | -1.817322 | -0.987928 |
| C  | 3.534204  | -2.273170 | 0.590725  |
| C  | 1.462449  | 0.939461  | 1.868148  |
| H  | 1.410749  | -2.281917 | 1.079260  |
| C  | 0.082643  | 1.725751  | 3.863588  |
| C  | -0.173425 | 2.691796  | 1.530420  |
| C  | 1.166105  | 1.924154  | -0.395202 |
| H  | 2.571184  | 0.349052  | 0.110240  |
| C  | -1.356820 | -1.890021 | 2.154054  |
| C  | -1.878511 | -1.101324 | -1.227040 |
| C  | 0.334393  | -1.676999 | -1.325257 |
| H  | -2.618041 | 2.837608  | -1.059288 |
| C  | 2.712845  | -1.679474 | -2.010862 |
| C  | 4.482601  | -2.079434 | -0.415137 |
| H  | 3.855210  | -2.522416 | 1.604560  |
| H  | 0.112357  | 0.683113  | 4.206675  |
| H  | 0.787995  | 2.309713  | 4.474065  |
| H  | -0.927311 | 2.125645  | 4.020754  |
| C  | 0.131573  | 2.720252  | 0.132135  |
| H  | -1.023926 | 3.270791  | 1.887273  |
| C  | 1.631963  | 2.012974  | -1.838199 |
| C  | -2.622158 | -2.338225 | 2.859032  |
| C  | -2.552457 | -0.093045 | -1.912648 |
| C  | -2.499888 | -2.322275 | -0.958777 |
| H  | -0.023405 | -2.316169 | -2.146779 |
| C  | 4.071079  | -1.785900 | -1.716821 |
| H  | 2.387700  | -1.461857 | -3.031566 |
| H  | 5.547269  | -2.169666 | -0.187457 |
| H  | -0.492507 | 3.323766  | -0.530242 |
| C  | 0.519132  | 1.888627  | -2.876687 |
| C  | 2.412678  | 3.324822  | -2.001283 |
| H  | 2.337718  | 1.180314  | -1.989886 |
| H  | -2.808729 | -1.719031 | 3.747002  |
| H  | -3.471157 | -2.194980 | 2.171858  |
| H  | -2.558858 | -3.396832 | 3.137537  |
| C  | -3.854142 | -0.319906 | -2.350448 |
| H  | -2.077850 | 0.872468  | -2.087529 |
| C  | -3.808794 | -2.534706 | -1.389884 |
| H  | -1.959385 | -3.085623 | -0.394647 |
| H  | 4.811097  | -1.647096 | -2.507814 |
| H  | 0.935616  | 2.047586  | -3.882694 |
| H  | -0.284334 | 2.622957  | -2.715541 |

-----

IRC forward from **TS(C<sup>1</sup>-D<sup>+</sup>)•S**

wB97X-D3 SCF (DZ) = -1845.156979

\*xyz 0 1

|    |           |           |           |
|----|-----------|-----------|-----------|
| Ru | -0.147844 | 0.507089  | 0.707565  |
| C  | 2.223386  | -2.109204 | 0.305531  |
| C  | 0.463333  | 1.804533  | 2.374117  |
| C  | 1.915533  | 1.120552  | 0.482782  |
| H  | 2.091157  | 0.344195  | 2.503449  |
| O  | -0.578077 | -2.712748 | 1.777501  |
| N  | -0.416445 | -0.990384 | -0.802415 |
| Cl | -3.705028 | 2.261218  | 0.878912  |
| O  | -1.312617 | -0.597654 | 1.916538  |
| C  | 1.852385  | -1.859647 | -1.022006 |
| C  | 3.574599  | -2.202938 | 0.633493  |
| C  | 1.552552  | 1.039192  | 1.854908  |
| H  | 1.440853  | -2.245773 | 1.057325  |
| C  | 0.060267  | 1.697538  | 3.814513  |
| C  | -0.298702 | 2.541008  | 1.445135  |
| C  | 1.179216  | 1.907758  | -0.440164 |
| H  | 2.737865  | 0.502784  | 0.118713  |
| C  | -1.438536 | -1.890550 | 2.077321  |
| C  | -1.794017 | -1.143819 | -1.201633 |
| C  | 0.433817  | -1.751444 | -1.393577 |
| H  | -2.869556 | 2.903686  | -0.936482 |
| C  | 2.826687  | -1.737366 | -2.020185 |
| C  | 4.548709  | -2.031521 | -0.351738 |
| H  | 3.868483  | -2.405193 | 1.665774  |
| H  | 0.252546  | 0.686571  | 4.200543  |
| H  | 0.653060  | 2.411977  | 4.407327  |
| H  | -1.004122 | 1.937427  | 3.942365  |
| C  | 0.030686  | 2.568140  | 0.054220  |
| H  | -1.247039 | 2.987992  | 1.753659  |
| C  | 1.629294  | 1.999461  | -1.885593 |
| C  | -2.758299 | -2.287767 | 2.695990  |
| C  | -2.507810 | -0.043835 | -1.682076 |
| C  | -2.405563 | -2.396257 | -1.076301 |
| H  | 0.081240  | -2.363935 | -2.235670 |
| C  | 4.175242  | -1.799201 | -1.677717 |
| H  | 2.526329  | -1.566898 | -3.057332 |
| H  | 5.607073  | -2.091327 | -0.088038 |
| H  | -0.664102 | 3.064694  | -0.631158 |
| C  | 0.507415  | 1.852234  | -2.911681 |
| C  | 2.377519  | 3.329516  | -2.052940 |
| H  | 2.350778  | 1.180957  | -2.042243 |
| H  | -2.916180 | -1.727311 | 3.628570  |
| H  | -3.572539 | -2.018351 | 2.005566  |
| H  | -2.781307 | -3.365968 | 2.893936  |
| C  | -3.836337 | -0.211006 | -2.071218 |
| H  | -2.045798 | 0.941817  | -1.767499 |
| C  | -3.736125 | -2.548417 | -1.459397 |
| H  | -1.842257 | -3.234149 | -0.655731 |
| H  | 4.937741  | -1.674805 | -2.449154 |
| H  | 0.914212  | 2.001163  | -3.922774 |
| H  | -0.298680 | 2.585360  | -2.756396 |

|   |           |           |           |
|---|-----------|-----------|-----------|
| H | 0.070946  | 0.885192  | -2.855912 |
| H | 3.219037  | 3.408349  | -1.256704 |
| H | 1.745541  | 4.194042  | -1.883490 |
| H | 2.864540  | 3.374207  | -3.003319 |
| C | -4.486189 | -1.536252 | -2.089759 |
| H | -4.380889 | 0.471298  | -2.888219 |
| H | -4.296194 | -3.488223 | -1.176594 |
| H | -5.510538 | -1.703431 | -2.428722 |
| C | -3.417645 | 4.146240  | -2.265397 |
| H | -3.104619 | 4.699824  | -3.162460 |
| H | -4.310402 | 3.549063  | -2.524077 |
| H | -3.705298 | 4.880624  | -1.491836 |
| O | -2.335331 | 3.335286  | -1.855900 |

\*

|   |           |           |           |
|---|-----------|-----------|-----------|
| H | 0.063552  | 0.846955  | -2.875575 |
| H | 3.194750  | 3.424792  | -1.321867 |
| H | 1.692484  | 4.181823  | -1.915142 |
| H | 2.809385  | 3.396170  | -3.062508 |
| C | -4.451707 | -1.458137 | -1.964359 |
| H | -4.391150 | 0.650996  | -2.452945 |
| H | -4.214762 | -3.525602 | -1.358264 |
| H | -5.494139 | -1.580408 | -2.266374 |
| C | -3.354238 | 4.181368  | -2.335269 |
| H | -2.889968 | 4.592445  | -3.245812 |
| H | -4.316656 | 3.715832  | -2.617326 |
| H | -3.569191 | 5.022316  | -1.650348 |
| O | -2.459321 | 3.243533  | -1.767856 |

\*

IRC backward from  $\text{TS}(\text{C}^1\text{-D}^+)\bullet\text{S}_2$   
 wB97X-D3 SCF (DZ) = -1960.874852

|          |           |           |           |
|----------|-----------|-----------|-----------|
| *xyz 0 1 |           |           |           |
| Ru       | -0.523526 | 0.493557  | 0.604505  |
| C        | 1.200464  | 0.872360  | 1.842753  |
| C        | 1.586120  | 1.005665  | 0.492111  |
| C        | 0.120960  | 1.639045  | 2.375183  |
| H        | 1.687350  | 0.125218  | 2.468494  |
| C        | -0.198077 | 2.595388  | 0.099342  |
| C        | -0.573698 | 2.469860  | 1.472106  |
| C        | 0.910516  | 1.888955  | -0.403338 |
| C        | 1.864633  | -2.174643 | 0.356880  |
| O        | 0.153854  | -1.666701 | 3.210388  |
| Cl       | -3.319900 | 1.140084  | 0.588143  |
| N        | -0.611838 | -0.908889 | -1.070630 |
| O        | -1.279254 | -1.151990 | 1.553776  |
| H        | 2.406040  | 0.396129  | 0.112636  |
| C        | -0.305004 | 1.513440  | 3.808912  |
| H        | -0.832218 | 3.185095  | -0.564490 |
| H        | -1.490252 | 2.955308  | 1.807266  |
| C        | 1.448406  | 2.055491  | -1.812783 |
| C        | 1.657060  | -1.892682 | -0.998233 |
| C        | 3.158632  | -2.372695 | 0.832683  |
| H        | 1.020658  | -2.218901 | 1.046099  |
| C        | -0.969054 | -1.680094 | 2.703474  |
| H        | -3.473345 | 0.860912  | 2.744879  |
| H        | -2.992419 | 2.669964  | -0.972875 |
| C        | -1.894309 | -1.056933 | -1.709074 |
| C        | 0.306197  | -1.680947 | -1.546696 |
| H        | 0.182036  | 0.653554  | 4.283558  |
| H        | -0.023793 | 2.427746  | 4.353035  |
| H        | -1.394328 | 1.381811  | 3.880526  |
| C        | 0.393642  | 2.118066  | -2.913175 |
| C        | 2.334381  | 3.310981  | -1.814333 |
| H        | 2.096280  | 1.185294  | -2.008099 |
| C        | 2.747084  | -1.857924 | -1.878936 |
| C        | 4.248064  | -2.284562 | -0.035281 |
| H        | 3.315456  | -2.586200 | 1.892005  |
| C        | -2.152186 | -2.319913 | 3.397041  |
| O        | -3.566695 | 0.818838  | 3.717440  |
| O        | -2.688122 | 3.313828  | -1.643353 |
| C        | -2.523238 | 0.036653  | -2.301782 |
| C        | -2.510621 | -2.309781 | -1.707212 |
| H        | 0.067584  | -2.251283 | -2.455862 |
| H        | 0.875485  | 2.373442  | -3.868626 |
| H        | -0.380864 | 2.873138  | -2.710106 |
| H        | -0.101611 | 1.146213  | -3.040942 |
| H        | 3.108228  | 3.259018  | -1.033573 |
| H        | 1.728002  | 4.214198  | -1.638347 |
| H        | 2.835147  | 3.417995  | -2.788058 |

IRC forward from  $\text{TS}(\text{C}^1\text{-D}^+)\bullet\text{S}_2$   
 wB97X-D3 SCF (DZ) = -1960.870189

|          |           |           |           |
|----------|-----------|-----------|-----------|
| *xyz 0 1 |           |           |           |
| Ru       | -0.331957 | 0.328779  | 0.548792  |
| C        | 1.261507  | 0.933496  | 1.832920  |
| C        | 1.679492  | 1.081313  | 0.482502  |
| C        | 0.095149  | 1.587754  | 2.318274  |
| H        | 1.808549  | 0.252399  | 2.485939  |
| C        | -0.261912 | 2.438846  | 0.011091  |
| C        | -0.676991 | 2.293832  | 1.368932  |
| C        | 0.947621  | 1.872236  | -0.443863 |
| C        | 1.984105  | -2.160440 | 0.326929  |
| O        | -0.018738 | -1.721736 | 3.149149  |
| Cl       | -4.201286 | 1.760654  | 0.802923  |
| N        | -0.453605 | -1.022374 | -1.121752 |
| O        | -1.339008 | -1.146094 | 1.442109  |
| H        | 2.556309  | 0.530951  | 0.137666  |
| C        | -0.361837 | 1.445122  | 3.739059  |
| H        | -0.947093 | 2.934520  | -0.682552 |
| H        | -1.671142 | 2.652939  | 1.646198  |
| C        | 1.472147  | 2.045887  | -1.856220 |
| C        | 1.814831  | -1.925155 | -1.044533 |
| C        | 3.266132  | -2.310106 | 0.849632  |
| H        | 1.118348  | -2.227120 | 0.989757  |
| C        | -1.129461 | -1.661254 | 2.634725  |
| H        | -3.806935 | 1.087831  | 2.800124  |
| H        | -3.251526 | 2.761936  | -0.860532 |
| C        | -1.766114 | -1.144865 | -1.698321 |
| C        | 0.476104  | -1.754747 | -1.627035 |
| H        | 0.152557  | 0.614028  | 4.234880  |
| H        | -0.134294 | 2.376733  | 4.279416  |
| H        | -1.447739 | 1.274286  | 3.781939  |
| C        | 0.398750  | 2.051645  | -2.941579 |
| C        | 2.303777  | 3.336955  | -1.882858 |
| H        | 2.151276  | 1.198248  | -2.046212 |
| C        | 2.930176  | -1.885424 | -1.891331 |
| C        | 4.378882  | -2.221306 | 0.011736  |
| H        | 3.395288  | -2.493687 | 1.918252  |
| C        | -2.375803 | -2.175709 | 3.306968  |
| O        | -3.653375 | 0.892476  | 3.749331  |
| O        | -2.798553 | 3.225270  | -1.597915 |
| C        | -2.503149 | 0.002310  | -1.999218 |
| C        | -2.311005 | -2.416093 | -1.917386 |
| H        | 0.260203  | -2.302942 | -2.555158 |
| H        | 0.864812  | 2.255133  | -3.916666 |
| H        | -0.366256 | 2.824135  | -2.767766 |
| H        | -0.107582 | 1.078806  | -3.011775 |
| H        | 3.089473  | 3.325753  | -1.112422 |
| H        | 1.661417  | 4.214864  | -1.706674 |
| H        | 2.786045  | 3.455678  | -2.864361 |

|   |           |           |           |
|---|-----------|-----------|-----------|
| C | 4.041324  | -2.030057 | -1.392173 |
| H | 2.581279  | -1.669778 | -2.942532 |
| H | 5.262215  | -2.424125 | 0.345668  |
| H | -2.817559 | -1.508655 | 3.733721  |
| H | -2.721368 | -2.945176 | 2.695612  |
| H | -1.828338 | -2.911707 | 4.261002  |
| C | -4.212566 | 2.010791  | 4.121841  |
| C | -3.821933 | 3.987182  | -2.156997 |
| C | -3.749628 | -0.139004 | -2.935259 |
| H | -2.078301 | 1.028517  | -2.248156 |
| C | -3.747772 | -2.473804 | -2.328729 |
| H | -2.026033 | -3.149242 | -1.202584 |
| H | 4.891663  | -1.972432 | -2.074660 |
| H | -4.415503 | 1.936611  | 5.201435  |
| H | -5.178958 | 2.155399  | 3.601074  |
| H | -3.590420 | 2.905427  | 3.950585  |
| H | -4.405298 | 4.483625  | -1.361374 |
| H | -4.492284 | 3.307553  | -2.710839 |
| H | -3.465015 | 4.758969  | -2.853617 |
| C | -4.365345 | -1.390788 | -2.953092 |
| H | -4.232860 | 0.720458  | -3.405241 |
| H | -4.226935 | -3.454148 | -2.322113 |
| H | -5.332760 | -1.518186 | -3.442995 |

\*

|   |           |           |           |
|---|-----------|-----------|-----------|
| C | 4.210497  | -2.011635 | -1.358483 |
| H | 2.791363  | -1.731513 | -2.964163 |
| H | 5.383275  | -2.329412 | 0.426896  |
| H | -2.968638 | -1.305245 | 3.631338  |
| H | -2.985505 | -2.753755 | 2.599541  |
| H | -2.113655 | -2.789012 | 4.176956  |
| C | -4.075865 | 2.021863  | 4.489630  |
| C | -3.740670 | 4.064869  | -2.237626 |
| C | -3.770152 | -0.122107 | -2.567184 |
| H | -2.107573 | 1.001970  | -1.809857 |
| C | -3.580887 | -2.529968 | -2.479053 |
| H | -1.750903 | -3.311316 | -1.632029 |
| H | 5.080717  | -1.955855 | -2.015166 |
| H | -3.854847 | 1.841958  | 5.553535  |
| H | -5.161188 | 2.209980  | 4.390169  |
| H | -3.537378 | 2.935766  | 4.180034  |
| H | -4.219045 | 4.767934  | -1.533166 |
| H | -4.534764 | 3.484335  | -2.739767 |
| H | -3.209201 | 4.652835  | -3.000352 |
| C | -4.308001 | -1.384899 | -2.813970 |
| H | -4.336455 | 0.782678  | -2.804562 |
| H | -4.003330 | -3.524238 | -2.644456 |
| H | -5.302331 | -1.477126 | -3.256044 |

\*

IRC backward from  $TS(C^1-D^+) \cdot S_3$   
 wB97X-D3 SCF (DZ) = -2076.588614

\*xyz 0 1

|    |           |           |           |
|----|-----------|-----------|-----------|
| Ru | -0.529321 | 0.480909  | 0.622870  |
| C  | 1.183896  | 0.956975  | 1.845399  |
| C  | 1.566208  | 1.053836  | 0.491358  |
| C  | 0.077493  | 1.707200  | 2.349514  |
| H  | 1.686418  | 0.241462  | 2.494738  |
| C  | -0.634011 | 2.492916  | 1.419705  |
| C  | -0.261845 | 2.579585  | 0.043308  |
| C  | 0.863419  | 1.883269  | -0.435346 |
| Cl | -3.291877 | 0.944227  | 0.595326  |
| C  | 2.013328  | -2.114356 | 0.375574  |
| N  | -0.571550 | -0.990497 | -1.000125 |
| O  | 0.301892  | -1.570022 | 3.267371  |
| O  | -1.199001 | -1.172234 | 1.638066  |
| H  | 2.401591  | 0.453637  | 0.132558  |
| C  | -0.359276 | 1.608793  | 3.783231  |
| H  | -1.557262 | 2.976454  | 1.740266  |
| H  | -0.911205 | 3.128255  | -0.641321 |
| C  | 1.395445  | 2.019123  | -1.850488 |
| H  | -3.006147 | 2.439995  | -1.053405 |
| H  | -5.202607 | 1.027166  | -0.812909 |
| H  | -3.431664 | 0.456793  | 2.749044  |
| C  | 1.746187  | -1.855308 | -0.973613 |
| C  | 3.331791  | -2.238711 | 0.808468  |
| H  | 1.195052  | -2.199904 | 1.091647  |
| C  | -1.866963 | -1.236236 | -1.583808 |
| C  | 0.364455  | -1.734413 | -1.475961 |
| C  | -0.808680 | -1.707896 | 2.756859  |
| H  | -1.441181 | 1.423790  | 3.847340  |
| H  | -0.130269 | 2.551233  | 4.302821  |
| H  | 0.161608  | 0.787203  | 4.289036  |
| C  | 0.337783  | 1.996313  | -2.950144 |
| C  | 2.231624  | 3.307372  | -1.900711 |
| H  | 2.077804  | 1.168665  | -2.013462 |
| O  | -2.783321 | 3.047711  | -1.782548 |
| O  | -6.049775 | 1.212453  | -1.251209 |
| O  | -3.540564 | 0.379943  | 3.715473  |
| C  | 2.802433  | -1.764042 | -1.890035 |

IRC forward from  $TS(C^1-D^+) \cdot S_3$   
 wB97X-D3 SCF (DZ) = -2076.583824

\*xyz 0 1

|    |           |           |           |
|----|-----------|-----------|-----------|
| Ru | -0.252477 | 0.276060  | 0.575838  |
| C  | 1.310966  | 1.007674  | 1.835159  |
| C  | 1.722239  | 1.132095  | 0.479081  |
| C  | 0.107048  | 1.608368  | 2.298868  |
| H  | 1.893548  | 0.377536  | 2.508752  |
| C  | -0.700996 | 2.240514  | 1.325706  |
| C  | -0.290175 | 2.365028  | -0.035526 |
| C  | 0.948158  | 1.848222  | -0.473272 |
| Cl | -4.193509 | 1.556211  | 0.860097  |
| C  | 2.166966  | -2.091856 | 0.318725  |
| N  | -0.375075 | -1.116477 | -1.054268 |
| O  | 0.157006  | -1.680426 | 3.225847  |
| O  | -1.205375 | -1.203822 | 1.520509  |
| H  | 2.628746  | 0.618768  | 0.152331  |
| C  | -0.348807 | 1.485185  | 3.722467  |
| H  | -1.716427 | 2.548240  | 1.587521  |
| H  | -0.998477 | 2.801957  | -0.745278 |
| C  | 1.454255  | 2.003009  | -1.894711 |
| H  | -3.256734 | 2.545963  | -0.834421 |
| H  | -5.650315 | 1.270047  | -0.746161 |
| H  | -3.693352 | 0.794635  | 2.832445  |
| C  | 1.931370  | -1.895574 | -1.048831 |
| C  | 3.474804  | -2.132049 | 0.796533  |
| H  | 1.330876  | -2.214642 | 1.011468  |
| C  | -1.712774 | -1.312394 | -1.547234 |
| C  | 0.559002  | -1.830520 | -1.574820 |
| C  | -0.950258 | -1.722293 | 2.701377  |
| H  | -1.430119 | 1.288753  | 3.775126  |
| H  | -0.142981 | 2.434317  | 4.240834  |
| H  | 0.186618  | 0.678811  | 4.236666  |
| C  | 0.373314  | 1.900834  | -2.968900 |
| C  | 2.201783  | 3.342284  | -1.974576 |
| H  | 2.184132  | 1.193369  | -2.060624 |
| O  | -2.913545 | 2.990803  | -1.636623 |
| O  | -6.388061 | 1.329416  | -1.383744 |
| O  | -3.586241 | 0.575800  | 3.779972  |
| C  | 3.008312  | -1.778111 | -1.936554 |

|   |           |           |           |
|---|-----------|-----------|-----------|
| C | 4.385324  | -2.096222 | -0.096101 |
| H | 3.535791  | -2.438373 | 1.862520  |
| C | -2.537749 | -0.231752 | -2.279843 |
| C | -2.449898 | -2.492144 | -1.415840 |
| H | 0.121905  | -2.358521 | -2.349434 |
| C | -1.947251 | -2.542019 | 3.408987  |
| H | 0.810677  | 2.216077  | -3.918800 |
| H | -0.458223 | 2.737744  | -2.783192 |
| H | -0.129750 | 1.005459  | -3.026144 |
| H | 3.002299  | 3.319992  | -1.114920 |
| H | 1.589848  | 4.193077  | -1.765781 |
| H | 2.734829  | 3.393950  | -2.875399 |
| C | -3.947057 | 3.797132  | -2.088718 |
| C | -6.857762 | 1.909184  | -0.322501 |
| C | -4.555169 | 1.288399  | 4.096853  |
| C | 4.119725  | -1.859955 | -1.446122 |
| H | 2.592341  | -1.592385 | -2.948789 |
| H | 5.418144  | -2.179654 | 0.249983  |
| C | -3.783935 | -0.501208 | -2.835757 |
| H | -2.112242 | 0.767632  | -2.361068 |
| C | -3.706904 | -2.749082 | -1.962377 |
| H | -1.924341 | -3.257926 | -0.839986 |
| H | -2.347269 | -3.220972 | 2.674032  |
| H | -2.677038 | -1.852007 | 3.756997  |
| H | -1.493360 | -3.110567 | 4.257103  |
| H | -4.164906 | 4.555498  | -1.315057 |
| H | -4.826497 | 3.141551  | -2.196091 |
| H | -3.770729 | 4.318548  | -3.040315 |
| H | -7.831437 | 2.095454  | -0.799627 |
| H | -7.034737 | 1.326483  | 0.599676  |
| H | -6.425942 | 2.886207  | -0.036411 |
| H | -5.521629 | 1.065170  | 3.609273  |
| H | -4.286036 | 2.335788  | 3.868505  |
| H | -4.693191 | 1.200184  | 5.184256  |
| H | 4.942176  | -1.758263 | -2.157309 |
| C | -4.374177 | -1.755779 | -2.678243 |
| H | -4.309163 | 0.289398  | -3.375331 |
| H | -4.161931 | -3.731835 | -1.823816 |
| H | -5.359105 | -1.953945 | -3.105322 |

\*  
-----

IRC backward from  $TS(C^1-D^+) \bullet S_3^P$   
wB97X-D3 SCF (DZ) = -2076.595330  
\*xyz 0 1

|    |           |           |           |
|----|-----------|-----------|-----------|
| Ru | -0.552447 | 0.675482  | 0.672721  |
| O  | 0.165515  | -1.411725 | 3.307174  |
| C  | 1.813908  | -2.171769 | 0.518454  |
| C  | -0.953914 | -1.545059 | 2.783167  |
| H  | 0.975811  | -2.206934 | 1.213161  |
| H  | 1.245729  | -2.715549 | 3.778205  |
| N  | -0.662106 | -0.840078 | -0.917730 |
| Cl | -3.109855 | 1.279601  | 0.583813  |
| O  | -1.351685 | -0.930570 | 1.725540  |
| C  | 1.600647  | -1.863456 | -0.829195 |
| C  | 3.103871  | -2.414130 | 0.986203  |
| C  | -1.994010 | -2.467494 | 3.379113  |
| O  | 1.876530  | -3.459142 | 3.870841  |
| C  | -1.950177 | -1.035151 | -1.534591 |
| C  | 0.241574  | -1.643755 | -1.362965 |
| H  | -2.804360 | 2.754075  | -1.096193 |
| H  | -3.310060 | 0.662120  | 2.746695  |
| C  | 2.686871  | -1.840475 | -1.715119 |
| C  | 4.189483  | -2.335725 | 0.112843  |
| H  | 3.238010  | -2.666941 | 2.040555  |
| H  | -2.401631 | -3.133475 | 2.605900  |

|   |           |           |           |
|---|-----------|-----------|-----------|
| C | 4.546037  | -1.965876 | -0.082796 |
| H | 3.656278  | -2.288836 | 1.861819  |
| C | -2.492766 | -0.208913 | -1.901575 |
| C | -2.236189 | -2.609026 | -1.617015 |
| H | 0.324041  | -2.434189 | -2.463190 |
| C | -2.143726 | -2.386150 | 3.340108  |
| H | 0.820684  | 2.080062  | -3.957337 |
| H | -0.427867 | 2.642697  | -2.825745 |
| H | -0.083609 | 0.901250  | -2.986065 |
| H | 2.995063  | 3.406163  | -1.214382 |
| H | 1.507714  | 4.183991  | -1.818020 |
| H | 2.665179  | 3.459354  | -2.965442 |
| C | -3.971106 | 3.778601  | -2.158528 |
| C | -7.412693 | 2.061674  | -0.741962 |
| C | -4.596026 | 1.271034  | 4.485758  |
| C | 4.312693  | -1.790458 | -1.448543 |
| H | 2.819745  | -1.648894 | -3.005116 |
| H | 5.570258  | -1.984987 | 0.296263  |
| C | -3.792353 | -0.406263 | -2.366501 |
| H | -2.111464 | 0.811544  | -1.826834 |
| C | -3.538701 | -2.795339 | -2.076320 |
| H | -1.633335 | -3.461811 | -1.288829 |
| H | -2.641695 | -3.047591 | 2.617618  |
| H | -2.856623 | -1.595875 | 3.624868  |
| H | -1.838902 | -2.953470 | 4.227513  |
| H | -4.151284 | 4.685616  | -1.552920 |
| H | -4.906910 | 3.197671  | -2.206778 |
| H | -3.694862 | 4.093818  | -3.175625 |
| H | -8.262706 | 2.145438  | -1.436316 |
| H | -7.769985 | 1.565724  | 0.179578  |
| H | -7.092229 | 3.084627  | -0.469879 |
| H | -5.611297 | 0.965848  | 4.173729  |
| H | -4.515657 | 2.365192  | 4.356054  |
| H | -4.485413 | 1.039096  | 5.555803  |
| H | 5.151309  | -1.669929 | -2.137082 |
| C | -4.315269 | -1.696379 | -2.455537 |
| H | -4.403114 | 0.459566  | -2.638628 |
| H | -3.945424 | -3.808993 | -2.124600 |
| H | -5.339237 | -1.841119 | -2.807378 |

\*  
-----

IRC forward from  $TS(C^1-D^+) \bullet S_3^P$   
wB97X-D3 SCF (DZ) = -2076.583586  
\*xyz 0 1

|    |           |           |           |
|----|-----------|-----------|-----------|
| Ru | -0.257082 | 0.366595  | 0.584579  |
| O  | -0.102174 | -1.468802 | 3.266487  |
| C  | 2.043039  | -2.139766 | 0.465735  |
| C  | -1.198137 | -1.520265 | 2.702428  |
| H  | 1.173796  | -2.188777 | 1.126200  |
| H  | 1.155061  | -2.638264 | 3.682764  |
| N  | -0.379526 | -1.067505 | -1.003392 |
| Cl | -4.337550 | 2.224643  | 0.924943  |
| O  | -1.412802 | -0.983918 | 1.535051  |
| C  | 1.879575  | -1.958943 | -0.914368 |
| C  | 3.319658  | -2.271487 | 1.006116  |
| C  | -2.397118 | -2.200848 | 3.305172  |
| O  | 1.819980  | -3.349666 | 3.740784  |
| C  | -1.716312 | -1.182482 | -1.515131 |
| C  | 0.536499  | -1.824426 | -1.497198 |
| H  | -3.285331 | 2.835276  | -0.878082 |
| H  | -3.770141 | 1.160083  | 2.734571  |
| C  | 3.001731  | -1.939550 | -1.753705 |
| C  | 4.437197  | -2.200949 | 0.173333  |
| H  | 3.417792  | -2.446232 | 2.079261  |
| H  | -2.872746 | -2.859813 | 2.566784  |

|   |           |           |           |
|---|-----------|-----------|-----------|
| H | -2.815400 | -1.837539 | 3.752777  |
| H | -1.572107 | -3.056123 | 4.202349  |
| C | 1.223546  | -4.607986 | 3.375912  |
| C | -2.559830 | -0.018893 | -2.266550 |
| C | -2.581114 | -2.268977 | -1.375326 |
| H | -0.018848 | -2.260736 | -2.236330 |
| O | -2.533746 | 3.350464  | -1.819101 |
| O | -3.429060 | 0.542255  | 3.706948  |
| C | 3.979724  | -2.048923 | -1.237708 |
| H | 2.521731  | -1.633704 | -2.775377 |
| H | 5.202694  | -2.511256 | 0.482385  |
| H | 1.939756  | -5.443449 | 3.385114  |
| H | 0.355397  | -4.899632 | 3.996679  |
| H | 0.868755  | -4.479702 | 2.335581  |
| C | -3.784784 | -0.262076 | -2.881807 |
| H | -2.101137 | 0.966272  | -2.339551 |
| C | -3.817731 | -2.498155 | -1.979646 |
| H | -2.106824 | -3.041424 | -0.767470 |
| C | -3.688732 | 4.020303  | -2.290983 |
| C | -4.324366 | 1.541249  | 4.155860  |
| H | 4.827908  | -1.997508 | -1.923951 |
| C | -4.416138 | -1.499063 | -2.742763 |
| H | -4.252715 | 0.531015  | -3.466996 |
| H | -4.304572 | -3.466715 | -1.851580 |
| H | -4.139241 | 4.671176  | -1.519588 |
| H | -4.460532 | 3.314654  | -2.647735 |
| H | -3.384548 | 4.652961  | -3.137510 |
| H | -5.309120 | 1.477789  | 3.657613  |
| H | -3.923847 | 2.561706  | 4.007038  |
| H | -4.478114 | 1.390871  | 5.234753  |
| H | -5.379194 | -1.677421 | -3.226390 |
| C | 1.215592  | 0.985970  | 1.885944  |
| C | 1.600900  | 1.038094  | 0.533962  |
| C | 0.186543  | 1.841755  | 2.389360  |
| H | 1.651253  | 0.232020  | 2.538897  |
| C | 0.972737  | 1.919160  | -0.398843 |
| H | 2.374952  | 0.360143  | 0.179329  |
| C | -0.252255 | 1.792238  | 3.825570  |
| C | -0.445455 | 2.690872  | 1.459798  |
| C | 1.514067  | 1.995900  | -1.815349 |
| C | -0.076518 | 2.726071  | 0.079183  |
| H | -1.332231 | 1.598750  | 3.890589  |
| H | -0.036050 | 2.752875  | 4.315761  |
| H | 0.270043  | 0.990358  | 4.360493  |
| H | -1.307441 | 3.274219  | 1.784051  |
| C | 0.457549  | 2.047346  | -2.913953 |
| C | 2.454799  | 3.209606  | -1.880000 |
| H | 2.124586  | 1.090917  | -1.968300 |
| H | -0.671241 | 3.330961  | -0.607187 |
| H | 0.944208  | 2.220591  | -3.885178 |
| H | -0.279872 | 2.847425  | -2.751225 |
| H | -0.085258 | 1.094888  | -2.979788 |
| H | 3.222848  | 3.167094  | -1.092727 |
| H | 1.889966  | 4.148113  | -1.758970 |
| H | 2.965643  | 3.240989  | -2.854080 |

\*

|   |           |           |           |
|---|-----------|-----------|-----------|
| H | -3.117746 | -1.413488 | 3.575719  |
| H | -2.111755 | -2.770876 | 4.195856  |
| C | 1.188295  | -4.519396 | 3.265418  |
| C | -2.453148 | -0.023228 | -1.766271 |
| C | -2.299625 | -2.440802 | -1.682778 |
| H | 0.306156  | -2.417416 | -2.393958 |
| O | -2.808591 | 3.153100  | -1.674305 |
| O | -3.623103 | 0.808177  | 3.636930  |
| C | 4.278398  | -2.033303 | -1.204490 |
| H | 2.871341  | -1.824155 | -2.832321 |
| H | 5.439170  | -2.293203 | 0.598196  |
| H | 1.923848  | -5.337314 | 3.281541  |
| H | 0.330511  | -4.820055 | 3.895795  |
| H | 0.825224  | -4.411006 | 2.225951  |
| C | -3.765366 | -0.120993 | -2.222400 |
| H | -2.022068 | 0.969251  | -1.634884 |
| C | -3.610752 | -2.529185 | -2.143870 |
| H | -1.739877 | -3.344482 | -1.428101 |
| C | -3.582512 | 4.172532  | -2.274732 |
| C | -4.331648 | 1.643583  | 4.529505  |
| H | 5.154207  | -1.988152 | -1.854980 |
| C | -4.343145 | -1.372114 | -2.417976 |
| H | -4.326827 | 0.796018  | -2.415069 |
| H | -4.059386 | -3.514923 | -2.273510 |
| H | -3.757476 | 5.023287  | -1.595565 |
| H | -4.561169 | 3.797647  | -2.617620 |
| H | -3.030124 | 4.545022  | -3.147513 |
| H | -5.411225 | 1.674834  | 4.302485  |
| H | -3.951343 | 2.679651  | 4.525316  |
| H | -4.207168 | 1.239359  | 5.543462  |
| H | -5.371945 | -1.443613 | -2.773944 |
| C | 1.302381  | 1.058459  | 1.865342  |
| C | 1.751099  | 1.148123  | 0.517787  |
| C | 0.114597  | 1.713371  | 2.296338  |
| H | 1.848091  | 0.417840  | 2.558985  |
| C | 1.023950  | 1.872986  | -0.460742 |
| H | 2.645045  | 0.595975  | 0.220371  |
| C | -0.374266 | 1.635474  | 3.711286  |
| C | -0.655490 | 2.349366  | 1.297408  |
| C | 1.561698  | 1.983627  | -1.874927 |
| C | -0.210057 | 2.430544  | -0.056584 |
| H | -1.444560 | 1.381365  | 3.738789  |
| H | -0.241391 | 2.621311  | 4.181914  |
| H | 0.187442  | 0.889094  | 4.283399  |
| H | -1.671264 | 2.684866  | 1.524845  |
| C | 0.495528  | 1.914348  | -2.966016 |
| C | 2.372514  | 3.285339  | -1.962097 |
| H | 2.255593  | 1.138573  | -2.016235 |
| H | -0.899715 | 2.865295  | -0.786221 |
| H | 0.966724  | 2.056438  | -3.949287 |
| H | -0.271673 | 2.695557  | -2.849437 |
| H | -0.008697 | 0.937746  | -2.977237 |
| H | 3.158369  | 3.323526  | -1.192700 |
| H | 1.717151  | 4.160732  | -1.826482 |
| H | 2.854173  | 3.367837  | -2.947748 |

\*

IRC backward from TS(C<sup>2</sup>-D<sup>+</sup>)

wB97X-D3 SCF (DZ) = -1497.645249

\*xyz 0 1

|    |           |           |           |
|----|-----------|-----------|-----------|
| Ru | 0.182042  | -0.642478 | 0.061960  |
| O  | -0.028500 | -0.759140 | -1.953839 |
| C  | -0.444495 | -1.824284 | -2.593473 |
| C  | -1.412058 | -1.502324 | -3.710274 |
| O  | -0.134513 | -2.980224 | -2.322535 |

IRC forward from TS(C<sup>2</sup>-D<sup>+</sup>)

wB97X-D3 SCF (DZ) = -1497.641965

\*xyz 0 1

|    |           |           |           |
|----|-----------|-----------|-----------|
| Ru | 0.396100  | -0.590969 | 0.020065  |
| O  | -0.196479 | -0.701648 | -1.869359 |
| C  | -0.558746 | -1.780321 | -2.547634 |
| C  | -1.656488 | -1.504477 | -3.541375 |
| O  | -0.066837 | -2.887034 | -2.384891 |

|   |           |           |           |   |           |           |           |
|---|-----------|-----------|-----------|---|-----------|-----------|-----------|
| C | 2.026236  | -1.148685 | 1.064016  | C | 2.089369  | -1.211707 | 1.170356  |
| C | 1.258203  | -0.346724 | 1.949425  | C | 1.313421  | -0.384696 | 2.016273  |
| C | 1.503463  | -2.348402 | 0.503692  | C | 1.539637  | -2.373908 | 0.543716  |
| C | -0.074360 | -0.676969 | 2.260487  | C | -0.062591 | -0.634316 | 2.193874  |
| C | 2.352599  | -3.187654 | -0.401650 | C | 2.399417  | -3.228730 | -0.337193 |
| C | 0.154963  | -2.681099 | 0.795377  | C | 0.159898  | -2.628614 | 0.722233  |
| C | -0.955130 | 0.157823  | 3.168285  | C | -0.958398 | 0.216390  | 3.071341  |
| C | -0.616735 | -1.839800 | 1.634468  | C | -0.635334 | -1.737353 | 1.487417  |
| C | -0.493886 | 1.606439  | 3.317688  | C | -0.482897 | 1.656977  | 3.240016  |
| C | -1.042752 | -0.537997 | 4.532469  | C | -1.086534 | -0.491925 | 4.428900  |
| H | -1.087760 | -0.621163 | -4.279497 | H | -1.464895 | -0.569630 | -4.085372 |
| H | -2.369613 | -1.257328 | -3.224742 | H | -2.578606 | -1.385948 | -2.950791 |
| H | -1.546553 | -2.363986 | -4.375086 | H | -1.767967 | -2.342135 | -4.240084 |
| H | 3.035986  | -0.835361 | 0.798670  | H | 3.125119  | -0.939155 | 0.961927  |
| H | 1.686933  | 0.593731  | 2.299769  | H | 1.766806  | 0.519652  | 2.423855  |
| H | 3.127509  | -2.578976 | -0.886321 | H | 3.190941  | -2.630436 | -0.808642 |
| H | 2.854746  | -3.957341 | 0.205440  | H | 2.880257  | -4.000091 | 0.283928  |
| H | 1.734006  | -3.666656 | -1.167069 | H | 1.796632  | -3.708264 | -1.115509 |
| H | -0.319216 | -3.515475 | 0.280722  | H | -0.320931 | -3.423248 | 0.152766  |
| H | -1.958725 | 0.131939  | 2.713536  | H | -1.953332 | 0.204922  | 2.598336  |
| H | -1.691562 | -2.001459 | 1.725652  | H | -1.728199 | -1.810246 | 1.457089  |
| H | -0.353693 | 2.101913  | 2.344751  | H | -0.327824 | 2.154933  | 2.271051  |
| H | 0.454168  | 1.674840  | 3.874634  | H | 0.458830  | 1.711475  | 3.808956  |
| H | -1.247322 | 2.178250  | 3.878974  | H | -1.237346 | 2.231587  | 3.796782  |
| H | -1.428606 | -1.564292 | 4.436220  | H | -1.492661 | -1.508646 | 4.315475  |
| H | -0.051767 | -0.587268 | 5.012407  | H | -0.106987 | -0.566519 | 4.928751  |
| H | -1.718751 | 0.019413  | 5.197765  | H | -1.763772 | 0.074663  | 5.085399  |
| N | 0.358437  | 1.476778  | -0.443531 | N | 0.425692  | 1.528043  | -0.454218 |
| C | 1.430871  | 2.187933  | -0.474500 | C | 1.487651  | 2.253748  | -0.448908 |
| C | -0.877801 | 2.170063  | -0.673590 | C | -0.832655 | 2.172517  | -0.699760 |
| C | 2.798059  | 1.639529  | -0.470811 | C | 2.843112  | 1.681696  | -0.427944 |
| C | -2.004623 | 1.815391  | 0.066420  | C | -1.980510 | 1.685958  | -0.071447 |
| C | -0.969393 | 3.161747  | -1.656188 | C | -0.926138 | 3.253351  | -1.583852 |
| C | 3.740849  | 2.136879  | 0.437126  | C | 3.789817  | 2.159496  | 0.485930  |
| C | 3.167947  | 0.658403  | -1.399712 | C | 3.195679  | 0.682623  | -1.346320 |
| C | -3.210340 | 2.477116  | -0.142464 | C | -3.201012 | 2.328337  | -0.260039 |
| C | -2.179663 | 3.821761  | -1.859743 | C | -2.153562 | 3.884093  | -1.776670 |
| C | 5.031328  | 1.611656  | 0.454116  | C | 5.064801  | 1.600366  | 0.516648  |
| C | 4.469688  | 0.163459  | -1.401618 | C | 4.483153  | 0.151085  | -1.332542 |
| C | -3.301145 | 3.486682  | -1.100108 | C | -3.290696 | 3.435358  | -1.103706 |
| C | 5.396571  | 0.627263  | -0.466101 | C | 5.412350  | 0.598744  | -0.392647 |
| H | 1.338141  | 3.282814  | -0.526146 | H | 1.394254  | 3.347910  | -0.483379 |
| H | -1.962382 | 1.002286  | 0.790568  | H | -1.952297 | 0.797581  | 0.563870  |
| H | -0.104067 | 3.401566  | -2.278132 | H | -0.049033 | 3.586368  | -2.142924 |
| H | 3.454526  | 2.916976  | 1.146700  | H | 3.516749  | 2.950580  | 1.188038  |
| H | 2.429960  | 0.285290  | -2.113296 | H | 2.465763  | 0.337864  | -2.082930 |
| H | -4.082029 | 2.181505  | 0.445121  | H | -4.079503 | 1.940974  | 0.259674  |
| H | -2.247301 | 4.593663  | -2.628892 | H | -2.218941 | 4.726340  | -2.468731 |
| H | 5.757737  | 1.978011  | 1.182475  | H | 5.794404  | 1.953121  | 1.248042  |
| H | 4.758896  | -0.596119 | -2.130512 | H | 4.759064  | -0.618357 | -2.056188 |
| H | -4.249556 | 4.001238  | -1.265539 | H | -4.249655 | 3.935795  | -1.252766 |
| H | 6.411835  | 0.224665  | -0.460136 | H | 6.416897  | 0.170848  | -0.374086 |
| O | -2.514545 | -1.093932 | -0.549917 | O | -3.106892 | -1.743089 | -0.589285 |
| C | -3.575998 | -0.913128 | 0.126778  | C | -3.910284 | -1.099215 | 0.133354  |
| C | -4.900981 | -0.921129 | -0.648709 | C | -5.266721 | -0.739544 | -0.493407 |
| O | -3.628459 | -0.686388 | 1.358899  | O | -3.694868 | -0.707476 | 1.313067  |
| H | -4.956718 | -1.765349 | -1.351648 | H | -5.667125 | -1.592536 | -1.061390 |
| H | -4.959124 | 0.006292  | -1.242054 | H | -5.117193 | 0.090894  | -1.203532 |
| H | -5.768015 | -0.947047 | 0.027613  | H | -6.001026 | -0.417101 | 0.259059  |

\*

\*

-----  
 IRC backward from **cis-TS(D<sup>+</sup>-E<sup>+</sup>)1**  
 wB97X-D3 SCF (DZ) = -1384.300159  
 \* xyz 0 1  
 Ru 0.176936 0.085383 -0.644281

-----  
 IRC forward from **cis-TS(D<sup>+</sup>-E<sup>+</sup>)1**  
 wB97X-D3 SCF (DZ) = -1384.300446  
 \* xyz 0 1  
 Ru 0.073069 0.044254 -0.612379

|   |           |           |           |
|---|-----------|-----------|-----------|
| C | 1.310527  | 0.837384  | 0.896696  |
| N | -1.012083 | -0.363814 | 1.106994  |
| C | 0.831980  | 0.571854  | 2.199706  |
| C | 2.559364  | 1.463115  | 0.799490  |
| C | -2.370451 | -0.808339 | 1.093600  |
| C | -0.472875 | -0.055828 | 2.239936  |
| C | 1.553273  | 0.909055  | 3.353338  |
| C | 3.285015  | 1.806584  | 1.941057  |
| C | -2.722911 | -1.938115 | 0.350048  |
| C | -3.355288 | -0.084892 | 1.776672  |
| C | 2.788547  | 1.532884  | 3.221029  |
| C | -4.051368 | -2.353465 | 0.314100  |
| C | -4.684859 | -0.508111 | 1.732179  |
| C | -5.037056 | -1.642627 | 1.002665  |
| C | 0.458434  | 1.857764  | -1.807830 |
| C | 1.031733  | 0.781323  | -2.524597 |
| C | -0.899553 | 1.804487  | -1.362933 |
| C | 0.259930  | -0.381200 | -2.835237 |
| C | -1.588692 | 2.938711  | -0.628607 |
| C | -1.644968 | 0.635517  | -1.701615 |
| C | 0.912629  | -1.548735 | -3.513635 |
| C | -1.100089 | -0.428052 | -2.457545 |
| C | -0.697592 | 3.677609  | 0.367524  |
| C | -2.182836 | 3.897347  | -1.669747 |
| H | 2.988916  | 1.677358  | -0.182992 |
| H | -0.997816 | -0.246375 | 3.185332  |
| H | 1.144117  | 0.680616  | 4.341353  |
| H | 4.256345  | 2.296176  | 1.832206  |
| H | -1.931810 | -2.477529 | -0.173976 |
| H | -3.085471 | 0.822214  | 2.323045  |
| H | 3.367289  | 1.807427  | 4.104950  |
| H | -4.319863 | -3.242058 | -0.261377 |
| H | -5.450473 | 0.060856  | 2.264860  |
| H | -6.078635 | -1.969389 | 0.963839  |
| H | 1.089493  | 2.701758  | -1.527361 |
| H | 2.092558  | 0.801393  | -2.773326 |
| H | -2.421873 | 2.482094  | -0.067573 |
| H | -2.665121 | 0.541271  | -1.320689 |
| H | 1.875360  | -1.762359 | -3.032061 |
| H | 1.088480  | -1.303859 | -4.571788 |
| H | 0.278192  | -2.443323 | -3.459897 |
| H | -1.698542 | -1.316882 | -2.659554 |
| H | -0.285783 | 2.992561  | 1.121930  |
| H | 0.144776  | 4.182212  | -0.132266 |
| H | -1.282960 | 4.451507  | 0.885775  |
| H | -2.852551 | 3.368823  | -2.365087 |
| H | -1.382341 | 4.372118  | -2.260647 |
| H | -2.759612 | 4.693578  | -1.175861 |
| O | 2.225587  | -1.457097 | -0.718996 |
| C | 3.303697  | -1.549565 | -0.005780 |
| C | 4.588071  | -1.073261 | -0.679313 |
| O | 3.362484  | -2.015956 | 1.138057  |
| H | 4.421277  | -0.130593 | -1.218822 |
| H | 4.919756  | -1.820333 | -1.418678 |
| H | 5.390250  | -0.941529 | 0.060600  |
| O | 0.214224  | -2.954126 | -0.027637 |
| C | 0.341396  | -3.359672 | 1.318389  |
| H | 1.046774  | -2.469826 | -0.272062 |
| H | -0.614614 | -3.203302 | 1.848127  |
| H | 0.592214  | -4.433946 | 1.383386  |
| H | 1.134657  | -2.792476 | 1.831427  |

\*  
-----

IRC backward from  $TS(D^+-E^+)1\bullet S^p$   
 WB97X-D3 SCF (DZ) = -1384.776208

|   |           |           |           |
|---|-----------|-----------|-----------|
| C | 1.315165  | 0.751695  | 0.889881  |
| N | -1.069935 | -0.295253 | 1.129122  |
| C | 0.827937  | 0.547408  | 2.202065  |
| C | 2.562360  | 1.386362  | 0.785672  |
| C | -2.412790 | -0.772684 | 1.109212  |
| C | -0.494520 | -0.042150 | 2.257275  |
| C | 1.545078  | 0.911316  | 3.350344  |
| C | 3.279328  | 1.771182  | 1.921294  |
| C | -2.743151 | -1.903345 | 0.354654  |
| C | -3.404428 | -0.071875 | 1.798525  |
| C | 2.781964  | 1.529254  | 3.207304  |
| C | -4.064011 | -2.340161 | 0.316593  |
| C | -4.726189 | -0.513732 | 1.747908  |
| C | -5.059717 | -1.647796 | 1.009550  |
| C | 0.457875  | 1.821580  | -1.758767 |
| C | 1.043427  | 0.744496  | -2.471742 |
| C | -0.911102 | 1.793353  | -1.367471 |
| C | 0.266995  | -0.394158 | -2.806968 |
| C | -1.592116 | 2.931079  | -0.630204 |
| C | -1.681372 | 0.648162  | -1.755677 |
| C | 0.910037  | -1.562713 | -3.495106 |
| C | -1.119089 | -0.416426 | -2.480488 |
| C | -0.696864 | 3.664722  | 0.366813  |
| C | -2.182146 | 3.894448  | -1.669116 |
| H | 2.999859  | 1.585556  | -0.196674 |
| H | -1.000992 | -0.258088 | 3.206298  |
| H | 1.129310  | 0.712624  | 4.341892  |
| H | 4.247649  | 2.266615  | 1.805169  |
| H | -1.953473 | -2.427166 | -0.186111 |
| H | -3.139020 | 0.832417  | 2.350879  |
| H | 3.357555  | 1.826292  | 4.086506  |
| H | -4.318550 | -3.228603 | -0.265580 |
| H | -5.498660 | 0.042148  | 2.282686  |
| H | -6.096093 | -1.988458 | 0.966553  |
| H | 1.091547  | 2.655217  | -1.452613 |
| H | 2.108542  | 0.760908  | -2.702629 |
| H | -2.426358 | 2.477253  | -0.068752 |
| H | -2.714186 | 0.571502  | -1.408552 |
| H | 1.891846  | -1.761752 | -3.048280 |
| H | 1.038480  | -1.325981 | -4.562697 |
| H | 0.285823  | -2.462077 | -3.412476 |
| H | -1.715078 | -1.302189 | -2.701069 |
| H | -0.277547 | 2.975859  | 1.114282  |
| H | 0.140017  | 4.178070  | -0.133233 |
| H | -1.282575 | 4.432134  | 0.894547  |
| H | -2.853898 | 3.370359  | -2.365797 |
| H | -1.379426 | 4.367175  | -2.258623 |
| H | -2.756036 | 4.691512  | -1.173329 |
| O | 2.494083  | -1.685894 | -0.860187 |
| C | 3.470979  | -1.630569 | -0.034275 |
| C | 4.755586  | -1.059505 | -0.617526 |
| O | 3.445735  | -2.023671 | 1.144019  |
| H | 4.549636  | -0.111792 | -1.136223 |
| H | 5.142440  | -1.763818 | -1.370828 |
| H | 5.515737  | -0.906047 | 0.158523  |
| O | 0.282091  | -2.555340 | -0.049194 |
| C | 0.354906  | -3.185738 | 1.222380  |
| H | 1.231527  | -2.338856 | -0.343150 |
| H | -0.601776 | -3.059919 | 1.754307  |
| H | 0.535700  | -4.273526 | 1.124760  |
| H | 1.171925  | -2.757355 | 1.822526  |

\*  
-----

IRC forward from  $TS(D^+-E^+)1\bullet S^p$   
 WB97X-D3 SCF (DZ) = -1384.770132

\*xyz 0 1

|    |           |           |           |
|----|-----------|-----------|-----------|
| Ru | -0.261722 | 1.024661  | 0.084789  |
| C  | 1.592422  | 0.064106  | 2.318851  |
| O  | -0.865695 | 2.046056  | 2.393275  |
| C  | 2.819249  | 0.554873  | 2.750049  |
| C  | 1.468414  | -1.264136 | 1.893925  |
| H  | 0.711646  | 0.709942  | 2.366493  |
| N  | -0.630399 | -1.015516 | 0.711976  |
| O  | -2.194938 | 1.379026  | 0.789652  |
| C  | -2.035838 | 1.872323  | 1.957252  |
| H  | -0.868963 | 1.716371  | 4.265164  |
| C  | 3.931415  | -0.287027 | 2.765389  |
| H  | 2.899835  | 1.594124  | 3.075474  |
| C  | 2.575275  | -2.119840 | 1.956183  |
| C  | 0.195560  | -1.759421 | 1.360052  |
| C  | -1.857003 | -1.639422 | 0.270467  |
| C  | -3.256674 | 2.241069  | 2.749503  |
| O  | -1.086468 | 1.308051  | 5.122063  |
| C  | 3.806384  | -1.623771 | 2.379191  |
| H  | 4.897815  | 0.096900  | 3.098050  |
| H  | 2.477171  | -3.164126 | 1.650132  |
| H  | -0.052203 | -2.819485 | 1.510340  |
| C  | -1.880630 | -2.356952 | -0.926506 |
| C  | -3.012887 | -1.508396 | 1.040294  |
| H  | -3.083784 | 2.046728  | 3.815344  |
| H  | -3.440037 | 3.319074  | 2.621716  |
| H  | -4.134658 | 1.691967  | 2.387838  |
| C  | -1.047267 | -0.091626 | 4.927173  |
| H  | 4.675267  | -2.283549 | 2.410153  |
| C  | -3.075293 | -2.932274 | -1.361029 |
| H  | -0.966188 | -2.473494 | -1.511229 |
| C  | -4.200758 | -2.089097 | 0.599611  |
| H  | -2.978174 | -0.955907 | 1.979439  |
| H  | -0.019350 | -0.467130 | 4.767282  |
| H  | -1.664263 | -0.415464 | 4.067842  |
| H  | -1.448302 | -0.574002 | 5.830804  |
| C  | -4.237916 | -2.795102 | -0.603536 |
| H  | -3.091920 | -3.495151 | -2.296893 |
| H  | -5.104500 | -1.988164 | 1.204172  |
| H  | -5.172599 | -3.243049 | -0.947842 |
| C  | -0.789075 | 1.725494  | -1.831497 |
| C  | -0.037569 | 0.532765  | -1.979756 |
| C  | -0.274723 | 2.854312  | -1.115120 |
| H  | -1.822305 | 1.740271  | -2.184030 |
| C  | 1.281920  | 0.413758  | -1.437032 |
| H  | -0.497935 | -0.323803 | -2.474040 |
| C  | -1.143707 | 4.082018  | -0.933462 |
| C  | 0.990393  | 2.692613  | -0.517422 |
| C  | 2.078216  | -0.846270 | -1.601384 |
| C  | 1.758125  | 1.496169  | -0.679449 |
| C  | -0.752538 | 4.941079  | 0.267003  |
| C  | -1.129756 | 4.891770  | -2.236245 |
| H  | -2.168480 | 3.707813  | -0.770952 |
| H  | 1.372417  | 3.455017  | 0.161523  |
| H  | 1.438820  | -1.736375 | -1.529942 |
| H  | 2.539696  | -0.846229 | -2.601240 |
| H  | 2.878195  | -0.912066 | -0.852959 |
| H  | 2.703518  | 1.399142  | -0.144423 |
| H  | -0.727951 | 4.356119  | 1.198716  |
| H  | 0.234028  | 5.410591  | 0.125585  |
| H  | -1.486438 | 5.749820  | 0.393539  |
| H  | -1.458627 | 4.285526  | -3.093794 |
| H  | -0.116366 | 5.267239  | -2.449323 |
| H  | -1.805804 | 5.754800  | -2.149701 |

\*

\*xyz 0 1

|    |           |           |           |
|----|-----------|-----------|-----------|
| Ru | -0.069023 | 0.897793  | 0.066591  |
| C  | 1.328880  | 0.242537  | 1.969066  |
| O  | -0.842432 | 2.296937  | 2.910100  |
| C  | 2.488247  | 0.886648  | 2.388882  |
| C  | 1.295756  | -1.157318 | 1.838849  |
| H  | 0.392496  | 0.862291  | 2.022511  |
| N  | -0.697430 | -1.077061 | 0.571216  |
| O  | -1.807911 | 1.409119  | 1.098745  |
| C  | -1.851695 | 1.966453  | 2.258770  |
| H  | -1.053262 | 1.745254  | 4.608320  |
| C  | 3.626334  | 0.131698  | 2.669298  |
| H  | 2.490454  | 1.972166  | 2.504712  |
| C  | 2.430510  | -1.909464 | 2.143337  |
| C  | 0.078600  | -1.777286 | 1.317807  |
| C  | -1.940160 | -1.657359 | 0.141462  |
| C  | -3.236865 | 2.211925  | 2.805967  |
| O  | -1.267494 | 1.170473  | 5.368702  |
| C  | 3.595262  | -1.259094 | 2.548365  |
| H  | 4.538163  | 0.630572  | 3.000515  |
| H  | 2.405614  | -2.996326 | 2.042046  |
| H  | -0.168887 | -2.817800 | 1.563159  |
| C  | -1.989647 | -2.399318 | -1.038501 |
| C  | -3.082368 | -1.470079 | 0.920057  |
| H  | -3.263410 | 1.906975  | 3.861055  |
| H  | -3.442657 | 3.292338  | 2.763244  |
| H  | -3.999216 | 1.676615  | 2.228440  |
| C  | -0.997859 | -0.149128 | 4.948811  |
| H  | 4.487591  | -1.844619 | 2.775936  |
| C  | -3.202620 | -2.954809 | -1.444770 |
| H  | -1.080831 | -2.551832 | -1.624255 |
| C  | -4.288644 | -2.031372 | 0.504852  |
| H  | -3.016166 | -0.891752 | 1.842173  |
| H  | 0.079367  | -0.327523 | 4.766287  |
| H  | -1.544532 | -0.421580 | 4.024281  |
| H  | -1.323833 | -0.836276 | 5.743829  |
| C  | -4.352546 | -2.770025 | -0.677338 |
| H  | -3.243595 | -3.541779 | -2.364611 |
| H  | -5.183709 | -1.893004 | 1.114742  |
| H  | -5.300100 | -3.207353 | -0.998697 |
| C  | -0.820319 | 1.643756  | -1.787303 |
| C  | -0.059177 | 0.480799  | -2.043996 |
| C  | -0.254321 | 2.766581  | -1.094266 |
| H  | -1.877755 | 1.654755  | -2.055408 |
| C  | 1.293739  | 0.358119  | -1.600118 |
| H  | -0.549365 | -0.375806 | -2.509617 |
| C  | -1.123950 | 3.975685  | -0.827326 |
| C  | 1.070940  | 2.644998  | -0.638940 |
| C  | 2.084168  | -0.898974 | -1.819769 |
| C  | 1.819926  | 1.451651  | -0.882688 |
| C  | -0.652781 | 4.844284  | 0.336005  |
| C  | -1.221079 | 4.783835  | -2.129509 |
| H  | -2.126184 | 3.584596  | -0.586194 |
| H  | 1.519849  | 3.425100  | -0.024632 |
| H  | 1.435974  | -1.784256 | -1.765996 |
| H  | 2.547595  | -0.875760 | -2.817519 |
| H  | 2.882728  | -0.995197 | -1.071805 |
| H  | 2.811710  | 1.358914  | -0.435720 |
| H  | -0.539527 | 4.263212  | 1.263051  |
| H  | 0.306572  | 5.337246  | 0.112361  |
| H  | -1.393100 | 5.636227  | 0.520755  |
| H  | -1.608173 | 4.173781  | -2.959477 |
| H  | -0.231839 | 5.171138  | -2.420688 |
| H  | -1.898204 | 5.638650  | -1.989712 |

\*





```

*xyz 0 1
Ru -0.611745 -0.111818 -0.311400
C -1.257261 0.442976 -2.332306
C 0.416438 -1.251090 -1.855226
C -2.259422 -0.383012 -1.730032
C 0.087744 0.036488 -2.403000
H -1.529727 1.444754 -2.668715
C -0.568978 -2.063919 -1.273322
C -1.337833 1.977353 0.304108
N 1.143780 0.828786 0.448372
H -1.462392 1.066710 1.020201
O -0.738700 -1.092875 1.547028
H 1.459675 -1.571277 -1.822845
C -1.937944 -1.637812 -1.181924
H -3.269972 0.013308 -1.630720
C 1.148138 0.924113 -2.982623
H -0.266704 -2.992264 -0.785370
C -2.567638 2.565475 0.019326
C -0.186774 2.780090 0.428290
C 2.396421 0.154144 0.611997
C 1.081176 2.099766 0.652138
O -1.879544 0.556082 2.525147
C -1.346601 -0.573800 2.550699
C -2.941399 -2.514426 -0.463801
H 2.120279 0.739813 -2.506903
H 1.250062 0.708168 -4.056615
H 0.882955 1.983201 -2.865978
C -2.652632 3.946513 -0.140076
H -3.464108 1.942818 -0.032248
C -0.277715 4.165012 0.291025
C 2.429090 -1.062408 1.298158
C 3.563548 0.690009 0.060543
H 1.964804 2.663349 0.976269
H -1.329320 1.547922 4.019034
C -1.436657 -1.365043 3.818238
C -4.092430 -1.738613 0.173719
C -3.448217 -3.581029 -1.442235
H -2.382379 -3.018806 0.341253
C -1.515369 4.742454 0.009503
H -3.621494 4.403324 -0.344603
H 0.615533 4.781662 0.403511
C 3.641816 -1.728906 1.450342
H 1.504655 -1.467690 1.711972
C 4.770977 0.009789 0.213982
H 3.525727 1.623743 -0.504938
O -0.736705 1.798829 4.750278
H -0.802638 -2.256014 3.803848
H -2.490875 -1.650436 3.951599
H -1.168545 -0.690662 4.643258
H -3.729947 -0.938115 0.837369
H -4.752356 -1.287430 -0.583834
H -4.707300 -2.423382 0.775435
H -2.617656 -4.165343 -1.866530
H -3.997685 -3.112630 -2.274425
H -4.127435 -4.274909 -0.925973
H -1.597464 5.824988 -0.088068
C 4.814382 -1.197085 0.910185
H 3.669023 -2.674199 1.996071
H 5.680918 0.426882 -0.222182
C 0.545673 1.968764 4.184078
H 5.761500 -1.727761 1.026150
H 0.586089 2.828230 3.488538
H 0.894509 1.069901 3.639401
H 1.256743 2.163041 5.000354

```

\*

```

*xyz 0 1
Ru -0.620913 -0.056487 -0.336779
C -1.262056 0.445464 -2.335605
C 0.419014 -1.262979 -1.865576
C -2.266467 -0.377836 -1.734009
C 0.087420 0.034638 -2.395978
H -1.530380 1.446727 -2.675023
C -0.563561 -2.069228 -1.283542
C -1.286573 1.911617 0.177176
N 1.143636 0.834660 0.438034
H -1.645018 0.950977 1.534987
O -0.739846 -1.086626 1.545849
H 1.463265 -1.579774 -1.835632
C -1.929571 -1.627240 -1.178251
H -3.279021 0.011657 -1.637435
C 1.147088 0.922366 -2.980308
H -0.268506 -2.999745 -0.794443
C -2.535321 2.534820 0.001047
C -0.183287 2.773746 0.396263
C 2.391968 0.156986 0.608097
C 1.084302 2.110305 0.634351
O -1.861742 0.579097 2.466276
C -1.324082 -0.606567 2.529060
C -2.936413 -2.509672 -0.463332
H 2.120652 0.740755 -2.505884
H 1.248940 0.707445 -4.054709
H 0.882823 1.982096 -2.864656
C -2.641355 3.926014 -0.106755
H -3.448624 1.935568 -0.073229
C -0.283121 4.166448 0.313539
C 2.429028 -1.059739 1.295870
C 3.562885 0.689121 0.059670
H 1.966386 2.666340 0.975010
H -1.338952 1.600413 4.032613
C -1.450494 -1.338528 3.813727
C -4.092121 -1.739259 0.173467
C -3.445463 -3.577689 -1.441646
H -2.382308 -3.020374 0.341691
C -1.515441 4.743074 0.024000
H -3.612510 4.381136 -0.322140
H 0.611288 4.783625 0.425547
C 3.641459 -1.727660 1.449394
H 1.509429 -1.471042 1.712552
C 4.770703 0.009778 0.214330
C 3.526102 1.623166 -0.505311
O -0.729437 1.789511 4.760335
H -0.815118 -2.227947 3.793822
H -2.502330 -1.631730 3.944133
H -1.176900 -0.665512 4.637306
H -3.735008 -0.936571 0.836701
H -4.751502 -1.287664 -0.584212
H -4.707273 -2.424245 0.775038
H -2.616833 -4.164252 -1.866493
H -3.996615 -3.111330 -2.273950
H -4.125437 -4.272127 -0.925676
H -1.600931 5.824681 -0.094507
C 4.814819 -1.197241 0.910147
H 3.668143 -2.673030 1.995565
H 5.680745 0.426981 -0.221672
C 0.549858 1.968001 4.184207
H 5.761871 -1.728157 1.026340
H 0.582328 2.828310 3.490738
H 0.898295 1.070008 3.638204
H 1.259037 2.161755 5.000888

```

\*



```

* xyz 0 1
Ru -0.466622 -0.444565 0.369264
C -0.593781 -0.111150 2.454298
C -1.662487 1.175277 -0.021117
C 0.782910 -0.111703 2.078631
C -1.432108 -1.224186 2.163938
N 0.742927 0.713258 -0.984274
C -1.187577 2.043492 -1.030959
C -2.930330 1.455119 0.503602
C 1.721274 1.037130 2.397680
C 1.306995 -1.297772 1.464140
C -0.913582 -2.328217 1.447127
C 2.141274 0.540218 -1.234625
C 0.151320 1.745353 -1.494932
C -1.930467 3.134046 -1.504210
C -3.673753 2.545662 0.048810
C 1.075498 2.418128 2.298033
C 2.329968 0.801599 3.786154
C 0.485528 -2.377581 1.143924
C -1.798986 -3.463471 1.022474
C 2.646431 -0.716495 -1.577697
C 3.013221 1.625245 -1.079102
C -3.183241 3.386327 -0.957425
C 4.015271 -0.876824 -1.782492
C 4.382198 1.454168 -1.285650
C 4.887802 0.203668 -1.637529
H -1.028136 0.776689 2.914655
H -2.496536 -1.183757 2.395477
H -3.361598 0.809057 1.272763
H 2.536461 0.986307 1.656501
H 2.354200 -1.309917 1.152637
H 0.669605 2.386551 -2.219284
H -1.521146 3.777616 -2.287589
H -4.656254 2.742619 0.485501
H 0.619454 2.582701 1.310635
H 0.296610 2.562649 3.063536
H 1.838111 3.194947 2.456692
H 2.828613 -0.177887 3.845169
H 1.549336 0.835149 4.563592
H 3.074825 1.578505 4.015078
H 0.885781 -3.220023 0.580006
H -1.499526 -3.834271 0.032816
H -1.691190 -4.286155 1.746375
H -2.851946 -3.159484 0.989207
H 1.950798 -1.550535 -1.696955
H 2.624714 2.596816 -0.764580
H -3.777153 4.234275 -1.303324
H 4.404028 -1.859318 -2.059168
H 5.056352 2.304057 -1.157587
H 5.960826 0.068498 -1.790754
O -2.543033 -1.313068 -1.136171
C -3.232543 -0.639275 -2.182794
H -1.897829 -1.918436 -1.573875
H -3.868300 -1.334581 -2.760704
H -2.530415 -0.147486 -2.876255
H -3.881310 0.129409 -1.739668
Cl -0.233563 -2.634824 -2.426521

```

\*

```

-----
IRC backward from TS(F-FA)
wB97X-D3 SCF (DZ) = -1664.871123
* xyz 0 1
Ru -0.599990 -1.543528 -0.021557
N -1.734920 -0.155587 0.946127
C -3.142493 -0.087149 0.673467

```

```

* xyz 0 1
Ru -0.375059 -0.482749 0.333202
C -0.590070 -0.094413 2.409383
C -1.663694 1.083671 -0.098355
C 0.796523 -0.116882 2.082784
C -1.430109 -1.208596 2.117319
H -1.030865 0.803827 2.842573
N 0.791615 0.733691 -0.960277
O -3.010634 -1.470011 -1.230465
Cl -0.310118 -2.352241 -2.176191
C -1.175224 2.005509 -1.054716
C -2.932768 1.366224 0.432644
C 1.727048 1.038075 2.397327
C 1.337677 -1.322318 1.516489
C -0.905809 -2.329654 1.445559
H -2.499939 -1.154496 2.322341
C 2.184600 0.558482 -1.219523
C 0.178105 1.741345 -1.493616
C -3.429877 -0.653262 -2.300555
H -2.184157 -1.907947 -1.523313
C -1.907364 3.119661 -1.493600
C -3.661084 2.485992 0.024376
H -3.378207 0.705758 1.181045
C 1.075371 2.416106 2.293940
C 2.332942 0.806827 3.787727
H 2.543141 0.987551 1.657306
C 0.507411 -2.390295 1.187542
H 2.392178 -1.350422 1.235621
C -1.789280 -3.466576 1.020108
C 2.683817 -0.702343 -1.556230
C 3.055181 1.643895 -1.079140
H 0.688450 2.383600 -2.222249
H -3.947112 -1.240098 -3.081789
H -2.587878 -0.113910 -2.772020
H -4.130909 0.098281 -1.908009
C -3.162105 3.361479 -0.948161
H -1.486549 3.791397 -2.246901
H -4.641447 2.680520 0.469185
H 0.610334 2.574014 1.309479
H 0.303414 2.563764 3.065747
H 1.837575 3.195544 2.441049
H 2.835385 -0.170462 3.849301
H 1.549812 0.838175 4.562663
H 3.073814 1.587300 4.016437
H 0.910328 -3.241694 0.638766
H -1.463644 -3.859138 0.047819
H -1.714794 -4.275239 1.763311
H -2.836973 -3.150909 0.943650
C 4.049310 -0.866496 -1.771022
H 1.986927 -1.535787 -1.661885
C 4.421801 1.468388 -1.293304
H 2.665164 2.616737 -0.770785
H -3.748180 4.226785 -1.265267
C 4.922902 0.214670 -1.639786
H 4.433020 -1.851982 -2.043788
H 5.097017 2.318185 -1.175279
H 5.994131 0.076909 -1.799421

```

\*

```

-----
IRC forward from TS(F-FA)
wB97X-D3 SCF (DZ) = -1664.873500
* xyz 0 1
Ru -0.326457 -0.007699 0.597707
N -1.895086 1.001711 -0.187747
C -2.001721 2.388763 0.198003

```
